# Supplementary material for: Integrated analysis reveals five potential ceRNA biomarkers in human lung adenocarcinoma
Source: PeerJ. 2019 Apr 29;7:e6694. doi: 10.7717/peerj.6694 (PMC6497041; doi:10.7717/peerj.6694)
Supplement: Supplemental Information 4 [file peerj-07-6694-s004.xlsx]

## Sheet: Biological Process
category	over_represented_pvalue	under_represented_pvalue	numDEInCat	numInCat	term	ontology	over_represented_FDR	gene_id	gene_name
GO:0001944	1.04949e-26	1	108	600	vasculature development	BP	1.62598e-22	94|284|306|358|659|728|729|857|947|1003|1012|1285|1490|1524|1536|1634|1901|1906|1958|1960|2013|2022|2034|2247|2263|2277|2294|2624|2627|2701|2702|2719|2828|2852|3164|3202|3340|3373|3491|3553|3569|3953|4091|4211|4223|4327|4628|4638|4855|4881|4915|5155|5168|5175|5196|5740|5787|6237|6347|6369|6688|6886|6909|6910|6926|6943|7010|7048|7049|7075|7128|8322|8434|8613|8742|9021|9037|9314|9353|9444|9496|1020…	ACVRL1|ANGPT1|ANXA3|AQP1|BMPR2|C5AR1|C6|CAV1|CD34|CDH5|CDH13|COL4A3|CTGF|CX3CR1|CYBB|DCN|S1PR1|EDN1|EGR1|EGR3|EMP2|ENG|EPAS1|FGF2|FGFR2|VEGFD|FOXF1|GATA2|GATA6|GJA4|GJA5|GPC3|GPR4|GPER1|NR4A1|HOXA5|NDST1|HYAL1|CYR61|IL1B|IL6|LEPR|SMAD6|MEIS1|MEOX2|MMP19|MYH10|MYLK|NOTCH4|NPR1|NTRK2|PDGFB|ENPP2|PECAM1|PF4|PTGIS|PTPRB|RRAS|CCL2|CCL24|SPI1|TAL1|TBX2|TBX5|TBX3|TCF21|TEK|TGFBR2|TGFBR3|TIE1|TNFAIP3|FZD…
GO:0072358	3.86603e-26	1	108	609	cardiovascular system development	BP	2.30647e-22	94|284|306|358|659|728|729|857|947|1003|1012|1285|1490|1524|1536|1634|1901|1906|1958|1960|2013|2022|2034|2247|2263|2277|2294|2624|2627|2701|2702|2719|2828|2852|3164|3202|3340|3373|3491|3553|3569|3953|4091|4211|4223|4327|4628|4638|4855|4881|4915|5155|5168|5175|5196|5740|5787|6237|6347|6369|6688|6886|6909|6910|6926|6943|7010|7048|7049|7075|7128|8322|8434|8613|8742|9021|9037|9314|9353|9444|9496|1020…	ACVRL1|ANGPT1|ANXA3|AQP1|BMPR2|C5AR1|C6|CAV1|CD34|CDH5|CDH13|COL4A3|CTGF|CX3CR1|CYBB|DCN|S1PR1|EDN1|EGR1|EGR3|EMP2|ENG|EPAS1|FGF2|FGFR2|VEGFD|FOXF1|GATA2|GATA6|GJA4|GJA5|GPC3|GPR4|GPER1|NR4A1|HOXA5|NDST1|HYAL1|CYR61|IL1B|IL6|LEPR|SMAD6|MEIS1|MEOX2|MMP19|MYH10|MYLK|NOTCH4|NPR1|NTRK2|PDGFB|ENPP2|PECAM1|PF4|PTGIS|PTPRB|RRAS|CCL2|CCL24|SPI1|TAL1|TBX2|TBX5|TBX3|TCF21|TEK|TGFBR2|TGFBR3|TIE1|TNFAIP3|FZD…
GO:0072359	4.46615e-26	1	139	924	circulatory system development	BP	2.30647e-22	32|94|186|187|284|306|358|650|659|728|729|857|947|1003|1012|1285|1490|1524|1536|1634|1901|1906|1958|1960|2013|2022|2034|2078|2247|2263|2277|2294|2549|2624|2627|2697|2701|2702|2719|2828|2852|3084|3164|3202|3340|3373|3491|3553|3569|3953|4091|4211|4223|4327|4628|4629|4638|4855|4881|4915|5155|5168|5175|5196|5468|5740|5787|5950|6237|6347|6369|6445|6688|6886|6909|6910|6926|6943|7010|7048|7049|7075|7122…	ACACB|ACVRL1|AGTR2|APLNR|ANGPT1|ANXA3|AQP1|BMP2|BMPR2|C5AR1|C6|CAV1|CD34|CDH5|CDH13|COL4A3|CTGF|CX3CR1|CYBB|DCN|S1PR1|EDN1|EGR1|EGR3|EMP2|ENG|EPAS1|ERG|FGF2|FGFR2|VEGFD|FOXF1|GAB1|GATA2|GATA6|GJA1|GJA4|GJA5|GPC3|GPR4|GPER1|NRG1|NR4A1|HOXA5|NDST1|HYAL1|CYR61|IL1B|IL6|LEPR|SMAD6|MEIS1|MEOX2|MMP19|MYH10|MYH11|MYLK|NOTCH4|NPR1|NTRK2|PDGFB|ENPP2|PECAM1|PF4|PPARG|PTGIS|PTPRB|RBP4|RRAS|CCL2|CCL24|SGCG|S…
GO:0001568	9.3026e-26	1	104	577	blood vessel development	BP	3.60313e-22	94|284|306|358|659|728|729|857|947|1003|1012|1285|1490|1524|1536|1634|1901|1906|1958|1960|2013|2022|2034|2247|2263|2277|2294|2624|2627|2701|2702|2719|2828|2852|3164|3202|3340|3373|3491|3553|3569|3953|4091|4211|4223|4327|4628|4638|4855|4881|4915|5155|5168|5175|5196|5740|5787|6237|6347|6369|6688|6886|6909|6910|6926|6943|7010|7048|7049|7075|7128|8322|8434|8613|8742|9021|9037|9314|9353|9444|9496|1020…	ACVRL1|ANGPT1|ANXA3|AQP1|BMPR2|C5AR1|C6|CAV1|CD34|CDH5|CDH13|COL4A3|CTGF|CX3CR1|CYBB|DCN|S1PR1|EDN1|EGR1|EGR3|EMP2|ENG|EPAS1|FGF2|FGFR2|VEGFD|FOXF1|GATA2|GATA6|GJA4|GJA5|GPC3|GPR4|GPER1|NR4A1|HOXA5|NDST1|HYAL1|CYR61|IL1B|IL6|LEPR|SMAD6|MEIS1|MEOX2|MMP19|MYH10|MYLK|NOTCH4|NPR1|NTRK2|PDGFB|ENPP2|PECAM1|PF4|PTGIS|PTPRB|RRAS|CCL2|CCL24|SPI1|TAL1|TBX2|TBX5|TBX3|TCF21|TEK|TGFBR2|TGFBR3|TIE1|TNFAIP3|FZD…
GO:0051239	9.84423e-25	1	271	2641	regulation of multicellular organismal process	BP	3.05033e-21	32|94|153|154|177|185|186|284|306|322|341|358|408|477|482|554|627|650|659|695|710|714|728|729|745|845|857|947|948|1003|1178|1264|1268|1285|1361|1440|1490|1524|1536|1601|1634|1636|1674|1808|1839|1901|1906|1910|1958|1959|1960|2013|2022|2034|2078|2160|2202|2207|2219|2247|2263|2268|2277|2353|2532|2615|2621|2624|2627|2662|2690|2697|2702|2719|2824|2828|2852|3071|3084|3133|3142|3202|3373|3400|3491|3553|…	ACACB|ACVRL1|ADRB1|ADRB2|AGER|AGTR1|AGTR2|ANGPT1|ANXA3|APBB1|APOC1|AQP1|ARRB1|ATP1A2|ATP1B2|AVPR2|BDNF|BMP2|BMPR2|BTK|SERPING1|C1QC|C5AR1|C6|MYRF|CASQ2|CAV1|CD34|CD36|CDH5|CLC|CNN1|CNR1|COL4A3|CPB2|CSF3|CTGF|CX3CR1|CYBB|DAB2|DCN|ACE|DES|DPYSL2|HBEGF|S1PR1|EDN1|EDNRB|EGR1|EGR2|EGR3|EMP2|ENG|EPAS1|ERG|F11|EFEMP1|FCER1G|FCN1|FGF2|FGFR2|FGR|VEGFD|FOS|ACKR1|LRRC32|GAS6|GATA2|GATA6|GDF10|GHR|GJA1|GJA5|…
GO:0044707	5.57483e-23	1	488	6074	single-multicellular organism process	BP	1.33556e-19	2|32|33|94|104|153|154|177|181|185|186|187|240|246|284|306|322|341|358|361|408|467|477|482|554|590|597|627|650|659|660|695|710|713|714|728|729|745|845|847|857|858|894|947|948|1003|1012|1030|1036|1073|1178|1268|1271|1285|1305|1316|1361|1440|1490|1524|1536|1601|1602|1634|1636|1808|1827|1839|1843|1901|1906|1910|1958|1959|1960|2009|2012|2013|2022|2034|2078|2115|2157|2159|2160|2167|2192|2202|2207|2219…	A2M|ACACB|ACADL|ACVRL1|ADARB1|ADRB1|ADRB2|AGER|AGRP|AGTR1|AGTR2|APLNR|ALOX5|ALOX15|ANGPT1|ANXA3|APBB1|APOC1|AQP1|AQP4|ARRB1|ATF3|ATP1A2|ATP1B2|AVPR2|BCHE|BCL2A1|BDNF|BMP2|BMPR2|BMX|BTK|SERPING1|C1QB|C1QC|C5AR1|C6|MYRF|CASQ2|CAT|CAV1|CAV2|CCND2|CD34|CD36|CDH5|CDH13|CDKN2B|CDO1|CFL2|CLC|CNR1|CNTFR|COL4A3|COL13A1|KLF6|CPB2|CSF3|CTGF|CX3CR1|CYBB|DAB2|DACH1|DCN|ACE|DPYSL2|RCAN1|HBEGF|DUSP1|S1PR1|EDN1|…
GO:0040011	6.0343e-23	1	191	1645	locomotion	BP	1.33556e-19	94|104|177|185|186|284|306|477|482|627|650|659|667|683|728|857|858|947|1012|1490|1524|1601|1602|1634|1636|1808|1839|1901|1906|1910|1959|1960|2013|2022|2078|2115|2159|2192|2207|2247|2264|2268|2277|2294|2357|2358|2549|2621|2624|2674|2823|2852|2920|2921|2995|3036|3055|3071|3084|3164|3202|3373|3491|3553|3569|3577|3579|3730|4223|4628|4638|4915|4921|4973|5028|5155|5168|5175|5196|5295|5319|5473|5581|558…	ACVRL1|ADARB1|AGER|AGTR1|AGTR2|ANGPT1|ANXA3|ATP1A2|ATP1B2|BDNF|BMP2|BMPR2|DST|BST1|C5AR1|CAV1|CAV2|CD34|CDH13|CTGF|CX3CR1|DAB2|DACH1|DCN|ACE|DPYSL2|HBEGF|S1PR1|EDN1|EDNRB|EGR2|EGR3|EMP2|ENG|ERG|ETV1|F10|FBLN1|FCER1G|FGF2|FGFR4|FGR|VEGFD|FOXF1|FPR1|FPR2|GAB1|GAS6|GATA2|GFRA1|GPM6A|GPER1|CXCL2|CXCL3|GYPC|HAS1|HCK|NCKAP1L|NRG1|NR4A1|HOXA5|HYAL1|CYR61|IL1B|IL6|CXCR1|CXCR2|ANOS1|MEOX2|MYH10|MYLK|NTRK2…
GO:0006928	1.7301e-22	1	209	1884	movement of cell or subcellular component	BP	3.35055e-19	94|104|185|186|284|306|477|482|627|650|659|667|683|728|857|947|976|1012|1490|1524|1601|1602|1634|1636|1674|1770|1808|1839|1901|1906|1910|1959|1960|2013|2022|2078|2115|2159|2192|2207|2247|2264|2268|2277|2294|2357|2358|2549|2621|2624|2674|2697|2702|2823|2852|2920|2921|2995|3036|3055|3071|3084|3164|3202|3373|3491|3553|3569|3577|3579|3730|3762|4223|4628|4638|4915|4921|4973|5028|5155|5168|5175|5196|52…	ACVRL1|ADARB1|AGTR1|AGTR2|ANGPT1|ANXA3|ATP1A2|ATP1B2|BDNF|BMP2|BMPR2|DST|BST1|C5AR1|CAV1|CD34|ADGRE5|CDH13|CTGF|CX3CR1|DAB2|DACH1|DCN|ACE|DES|DNAH9|DPYSL2|HBEGF|S1PR1|EDN1|EDNRB|EGR2|EGR3|EMP2|ENG|ERG|ETV1|F10|FBLN1|FCER1G|FGF2|FGFR4|FGR|VEGFD|FOXF1|FPR1|FPR2|GAB1|GAS6|GATA2|GFRA1|GJA1|GJA5|GPM6A|GPER1|CXCL2|CXCL3|GYPC|HAS1|HCK|NCKAP1L|NRG1|NR4A1|HOXA5|HYAL1|CYR61|IL1B|IL6|CXCR1|CXCR2|ANOS1|KCNJ5…
GO:0048514	2.31419e-22	1	89	492	blood vessel morphogenesis	BP	3.98374e-19	94|284|306|358|659|728|729|857|947|1012|1285|1490|1524|1536|1634|1901|1906|1960|2013|2022|2034|2247|2263|2277|2294|2624|2627|2702|2828|3164|3202|3373|3491|3553|3569|3953|4211|4223|4327|4638|4855|4881|4915|5168|5196|5740|5787|6237|6347|6369|6688|6886|6909|6910|6943|7010|7048|7049|7075|7128|8322|8742|9037|9314|9353|9444|9496|10203|10266|10908|23328|23493|23554|28984|54345|54538|54922|55273|57493|64…	ACVRL1|ANGPT1|ANXA3|AQP1|BMPR2|C5AR1|C6|CAV1|CD34|CDH13|COL4A3|CTGF|CX3CR1|CYBB|DCN|S1PR1|EDN1|EGR3|EMP2|ENG|EPAS1|FGF2|FGFR2|VEGFD|FOXF1|GATA2|GATA6|GJA5|GPR4|NR4A1|HOXA5|HYAL1|CYR61|IL1B|IL6|LEPR|MEIS1|MEOX2|MMP19|MYLK|NOTCH4|NPR1|NTRK2|ENPP2|PF4|PTGIS|PTPRB|RRAS|CCL2|CCL24|SPI1|TAL1|TBX2|TBX5|TCF21|TEK|TGFBR2|TGFBR3|TIE1|TNFAIP3|FZD4|TNFSF12|SEMA5A|KLF4|SLIT2|QKI|TBX4|CALCRL|RAMP2|PNPLA6|SASH1…
GO:0001525	1.41021e-20	1	77	411	angiogenesis	BP	2.18484e-17	94|284|306|358|728|729|857|947|1012|1285|1490|1524|1536|1634|1901|1906|1960|2013|2022|2034|2247|2263|2277|2624|2627|2702|2828|3164|3202|3373|3491|3553|3569|3953|4211|4223|4327|4855|4881|5168|5196|5740|5787|6237|6347|6369|6886|6943|7010|7048|7075|7128|8742|9037|9314|9353|9496|10203|10266|10908|23328|23554|28984|54345|54538|54922|55273|64321|79625|79812|81575|83478|83700|90627|126393|168667|641700	ACVRL1|ANGPT1|ANXA3|AQP1|C5AR1|C6|CAV1|CD34|CDH13|COL4A3|CTGF|CX3CR1|CYBB|DCN|S1PR1|EDN1|EGR3|EMP2|ENG|EPAS1|FGF2|FGFR2|VEGFD|GATA2|GATA6|GJA5|GPR4|NR4A1|HOXA5|HYAL1|CYR61|IL1B|IL6|LEPR|MEIS1|MEOX2|MMP19|NOTCH4|NPR1|ENPP2|PF4|PTGIS|PTPRB|RRAS|CCL2|CCL24|TAL1|TCF21|TEK|TGFBR2|TIE1|TNFAIP3|TNFSF12|SEMA5A|KLF4|SLIT2|TBX4|CALCRL|RAMP2|PNPLA6|SASH1|TSPAN12|RGCC|SOX18|ROBO4|RASIP1|TMEM100|SOX17|NDNF|MM…
GO:0048870	2.2418e-20	1	166	1416	cell motility	BP	2.89435e-17	94|104|185|186|284|306|482|650|659|667|683|728|857|947|1012|1490|1524|1601|1602|1634|1636|1839|1901|1906|1910|1960|2013|2022|2078|2159|2192|2207|2247|2264|2268|2277|2294|2357|2358|2549|2621|2624|2823|2852|2920|2921|2995|3036|3055|3071|3084|3164|3202|3373|3491|3553|3569|3577|3579|4223|4628|4638|4915|4921|4973|5028|5155|5168|5175|5196|5295|5319|5473|5581|5588|5592|5627|5734|5800|6237|6283|6347|6358…	ACVRL1|ADARB1|AGTR1|AGTR2|ANGPT1|ANXA3|ATP1B2|BMP2|BMPR2|DST|BST1|C5AR1|CAV1|CD34|CDH13|CTGF|CX3CR1|DAB2|DACH1|DCN|ACE|HBEGF|S1PR1|EDN1|EDNRB|EGR3|EMP2|ENG|ERG|F10|FBLN1|FCER1G|FGF2|FGFR4|FGR|VEGFD|FOXF1|FPR1|FPR2|GAB1|GAS6|GATA2|GPM6A|GPER1|CXCL2|CXCL3|GYPC|HAS1|HCK|NCKAP1L|NRG1|NR4A1|HOXA5|HYAL1|CYR61|IL1B|IL6|CXCR1|CXCR2|MEOX2|MYH10|MYLK|NTRK2|DDR2|OLR1|P2RY1|PDGFB|ENPP2|PECAM1|PF4|PIK3R1|PLA2…
GO:0051674	2.2418e-20	1	166	1416	localization of cell	BP	2.89435e-17	94|104|185|186|284|306|482|650|659|667|683|728|857|947|1012|1490|1524|1601|1602|1634|1636|1839|1901|1906|1910|1960|2013|2022|2078|2159|2192|2207|2247|2264|2268|2277|2294|2357|2358|2549|2621|2624|2823|2852|2920|2921|2995|3036|3055|3071|3084|3164|3202|3373|3491|3553|3569|3577|3579|4223|4628|4638|4915|4921|4973|5028|5155|5168|5175|5196|5295|5319|5473|5581|5588|5592|5627|5734|5800|6237|6283|6347|6358…	ACVRL1|ADARB1|AGTR1|AGTR2|ANGPT1|ANXA3|ATP1B2|BMP2|BMPR2|DST|BST1|C5AR1|CAV1|CD34|CDH13|CTGF|CX3CR1|DAB2|DACH1|DCN|ACE|HBEGF|S1PR1|EDN1|EDNRB|EGR3|EMP2|ENG|ERG|F10|FBLN1|FCER1G|FGF2|FGFR4|FGR|VEGFD|FOXF1|FPR1|FPR2|GAB1|GAS6|GATA2|GPM6A|GPER1|CXCL2|CXCL3|GYPC|HAS1|HCK|NCKAP1L|NRG1|NR4A1|HOXA5|HYAL1|CYR61|IL1B|IL6|CXCR1|CXCR2|MEOX2|MYH10|MYLK|NTRK2|DDR2|OLR1|P2RY1|PDGFB|ENPP2|PECAM1|PF4|PIK3R1|PLA2…
GO:0050896	3.17905e-20	1	604	8443	response to stimulus	BP	3.7887e-17	2|21|32|94|104|153|154|177|181|185|186|187|240|241|246|284|306|322|358|361|366|395|408|467|477|554|590|627|650|659|660|667|683|687|695|710|712|713|714|728|729|730|732|761|820|845|847|857|858|894|945|947|948|968|976|1003|1012|1030|1036|1178|1262|1268|1271|1285|1326|1361|1410|1440|1490|1511|1524|1536|1572|1580|1601|1634|1675|1808|1827|1839|1843|1850|1901|1906|1910|1958|1959|1960|2013|2015|2022|2034…	A2M|ABCA3|ACACB|ACVRL1|ADARB1|ADRB1|ADRB2|AGER|AGRP|AGTR1|AGTR2|APLNR|ALOX5|ALOX5AP|ALOX15|ANGPT1|ANXA3|APBB1|AQP1|AQP4|AQP9|ARHGAP6|ARRB1|ATF3|ATP1A2|AVPR2|BCHE|BDNF|BMP2|BMPR2|BMX|DST|BST1|KLF9|BTK|SERPING1|C1QA|C1QB|C1QC|C5AR1|C6|C7|C8B|CA3|CAMP|CASQ2|CAT|CAV1|CAV2|CCND2|CD33|CD34|CD36|CD68|ADGRE5|CDH5|CDH13|CDKN2B|CDO1|CLC|CNGA4|CNR1|CNTFR|COL4A3|MAP3K8|CPB2|CRYAB|CSF3|CTGF|CTSG|CX3CR1|CYBB|C…
GO:0016477	2.65859e-19	1	153	1284	cell migration	BP	2.9421e-16	94|104|185|186|284|306|482|650|659|683|728|857|947|1012|1490|1524|1601|1602|1634|1636|1839|1901|1906|1910|1960|2013|2022|2078|2159|2207|2247|2264|2268|2277|2294|2357|2358|2549|2621|2624|2823|2852|2920|2921|2995|3036|3055|3071|3084|3164|3202|3373|3491|3553|3569|3577|3579|4223|4628|4638|4915|4921|4973|5028|5155|5168|5175|5196|5295|5319|5473|5581|5588|5592|5627|5734|5800|6237|6283|6347|6358|6368|636…	ACVRL1|ADARB1|AGTR1|AGTR2|ANGPT1|ANXA3|ATP1B2|BMP2|BMPR2|BST1|C5AR1|CAV1|CD34|CDH13|CTGF|CX3CR1|DAB2|DACH1|DCN|ACE|HBEGF|S1PR1|EDN1|EDNRB|EGR3|EMP2|ENG|ERG|F10|FCER1G|FGF2|FGFR4|FGR|VEGFD|FOXF1|FPR1|FPR2|GAB1|GAS6|GATA2|GPM6A|GPER1|CXCL2|CXCL3|GYPC|HAS1|HCK|NCKAP1L|NRG1|NR4A1|HOXA5|HYAL1|CYR61|IL1B|IL6|CXCR1|CXCR2|MEOX2|MYH10|MYLK|NTRK2|DDR2|OLR1|P2RY1|PDGFB|ENPP2|PECAM1|PF4|PIK3R1|PLA2G1B|PPBP|P…
GO:0006954	2.95209e-19	1	94	648	inflammatory response	BP	3.04911e-16	2|177|185|186|240|246|650|683|695|710|728|729|730|732|976|1036|1268|1524|1536|1910|2157|2167|2206|2207|2294|2353|2357|2358|2532|2697|2852|2920|2921|3055|3340|3373|3553|3568|3569|3577|3579|3949|3988|4023|4973|5023|5138|5196|5199|5320|5468|5473|5588|5627|5734|5740|5806|6283|6347|6358|6368|6369|6401|6403|6556|6614|6693|7010|7099|7128|7356|8639|9021|9034|9173|9314|9332|9450|9473|10203|51311|53342|549…	A2M|AGER|AGTR1|AGTR2|ALOX5|ALOX15|BMP2|BST1|BTK|SERPING1|C5AR1|C6|C7|C8B|ADGRE5|CDO1|CNR1|CX3CR1|CYBB|EDNRB|F8|FABP4|MS4A2|FCER1G|FOXF1|FOS|FPR1|FPR2|ACKR1|GJA1|GPER1|CXCL2|CXCL3|HCK|NDST1|HYAL1|IL1B|IL5RA|IL6|CXCR1|CXCR2|LDLR|LIPA|LPL|OLR1|P2RX1|PDE2A|PF4|CFP|PLA2G2A|PPARG|PPBP|PRKCQ|PROS1|PTGER4|PTGIS|PTX3|S100A12|CCL2|CCL14|CCL23|CCL24|SELE|SELP|SLC11A1|SIGLEC1|SPN|TEK|TLR4|TNFAIP3|SCGB1A1|AOC…
GO:0048731	4.2215e-18	1	370	4435	system development	BP	4.08773e-15	32|94|104|154|177|185|186|187|246|284|306|322|358|408|467|554|590|597|627|650|659|660|695|713|714|728|729|745|847|857|858|947|1003|1012|1030|1036|1073|1178|1268|1271|1285|1305|1316|1361|1440|1490|1524|1536|1601|1634|1636|1808|1827|1839|1901|1906|1910|1958|1959|1960|2009|2013|2022|2034|2078|2115|2202|2207|2247|2263|2273|2277|2294|2313|2353|2549|2621|2624|2627|2662|2674|2697|2701|2702|2719|2823|282…	ACACB|ACVRL1|ADARB1|ADRB2|AGER|AGTR1|AGTR2|APLNR|ALOX15|ANGPT1|ANXA3|APBB1|AQP1|ARRB1|ATF3|AVPR2|BCHE|BCL2A1|BDNF|BMP2|BMPR2|BMX|BTK|C1QB|C1QC|C5AR1|C6|MYRF|CAT|CAV1|CAV2|CD34|CDH5|CDH13|CDKN2B|CDO1|CFL2|CLC|CNR1|CNTFR|COL4A3|COL13A1|KLF6|CPB2|CSF3|CTGF|CX3CR1|CYBB|DAB2|DCN|ACE|DPYSL2|RCAN1|HBEGF|S1PR1|EDN1|EDNRB|EGR1|EGR2|EGR3|EML1|EMP2|ENG|EPAS1|ERG|ETV1|EFEMP1|FCER1G|FGF2|FGFR2|FHL1|VEGFD|FOXF…
GO:0048856	5.74139e-18	1	432	5447	anatomical structure development	BP	5.23243e-15	32|94|104|154|177|185|186|187|246|284|306|322|358|408|467|554|590|597|627|650|659|660|695|713|714|728|729|745|845|847|857|858|947|948|1003|1012|1030|1036|1073|1178|1268|1271|1285|1305|1316|1361|1440|1490|1524|1536|1601|1602|1634|1636|1776|1808|1827|1839|1843|1901|1906|1910|1958|1959|1960|2009|2012|2013|2022|2034|2078|2115|2171|2192|2202|2207|2247|2263|2268|2273|2277|2294|2313|2353|2549|2621|2624|…	ACACB|ACVRL1|ADARB1|ADRB2|AGER|AGTR1|AGTR2|APLNR|ALOX15|ANGPT1|ANXA3|APBB1|AQP1|ARRB1|ATF3|AVPR2|BCHE|BCL2A1|BDNF|BMP2|BMPR2|BMX|BTK|C1QB|C1QC|C5AR1|C6|MYRF|CASQ2|CAT|CAV1|CAV2|CD34|CD36|CDH5|CDH13|CDKN2B|CDO1|CFL2|CLC|CNR1|CNTFR|COL4A3|COL13A1|KLF6|CPB2|CSF3|CTGF|CX3CR1|CYBB|DAB2|DACH1|DCN|ACE|DNASE1L3|DPYSL2|RCAN1|HBEGF|DUSP1|S1PR1|EDN1|EDNRB|EGR1|EGR2|EGR3|EML1|EMP1|EMP2|ENG|EPAS1|ERG|ETV1|FAB…
GO:0032501	6.38256e-18	1	521	7117	multicellular organismal process	BP	5.49361e-15	2|32|33|94|104|153|154|177|181|185|186|187|240|246|284|306|322|341|358|361|366|408|467|477|482|554|590|597|627|650|659|660|695|710|713|714|728|729|745|845|847|857|858|894|947|948|1003|1012|1030|1036|1073|1178|1262|1264|1268|1271|1285|1305|1316|1359|1361|1410|1440|1490|1511|1524|1536|1601|1602|1634|1636|1674|1808|1827|1839|1843|1901|1906|1910|1958|1959|1960|2009|2012|2013|2022|2034|2078|2115|2157|…	A2M|ACACB|ACADL|ACVRL1|ADARB1|ADRB1|ADRB2|AGER|AGRP|AGTR1|AGTR2|APLNR|ALOX5|ALOX15|ANGPT1|ANXA3|APBB1|APOC1|AQP1|AQP4|AQP9|ARRB1|ATF3|ATP1A2|ATP1B2|AVPR2|BCHE|BCL2A1|BDNF|BMP2|BMPR2|BMX|BTK|SERPING1|C1QB|C1QC|C5AR1|C6|MYRF|CASQ2|CAT|CAV1|CAV2|CCND2|CD34|CD36|CDH5|CDH13|CDKN2B|CDO1|CFL2|CLC|CNGA4|CNN1|CNR1|CNTFR|COL4A3|COL13A1|KLF6|CPA3|CPB2|CRYAB|CSF3|CTGF|CTSG|CX3CR1|CYBB|DAB2|DACH1|DCN|ACE|DES|…
GO:0048583	7.09034e-18	1	319	3686	regulation of response to stimulus	BP	5.78162e-15	2|94|153|154|177|185|186|246|284|322|395|408|467|627|650|659|683|695|710|712|713|714|728|729|730|732|845|847|857|858|945|947|948|1012|1030|1178|1268|1326|1361|1410|1440|1490|1511|1524|1601|1634|1675|1827|1839|1843|1850|1901|1906|1910|1958|2013|2022|2040|2159|2160|2167|2192|2203|2206|2207|2214|2219|2247|2263|2264|2268|2277|2294|2353|2357|2358|2549|2621|2624|2627|2662|2690|2697|2719|2828|2852|2869|…	A2M|ACVRL1|ADRB1|ADRB2|AGER|AGTR1|AGTR2|ALOX15|ANGPT1|APBB1|ARHGAP6|ARRB1|ATF3|BDNF|BMP2|BMPR2|BST1|BTK|SERPING1|C1QA|C1QB|C1QC|C5AR1|C6|C7|C8B|CASQ2|CAT|CAV1|CAV2|CD33|CD34|CD36|CDH13|CDKN2B|CLC|CNR1|MAP3K8|CPB2|CRYAB|CSF3|CTGF|CTSG|CX3CR1|DAB2|DCN|CFD|RCAN1|HBEGF|DUSP1|DUSP8|S1PR1|EDN1|EDNRB|EGR1|EMP2|ENG|STOM|F10|F11|FABP4|FBLN1|FBP1|MS4A2|FCER1G|FCGR3A|FCN1|FGF2|FGFR2|FGFR4|FGR|VEGFD|FOXF1|FO…
GO:0042127	3.08018e-17	1	163	1524	regulation of cell proliferation	BP	2.38606e-14	94|104|177|185|186|284|358|467|554|590|650|659|660|683|687|695|728|857|858|894|945|1003|1012|1030|1178|1264|1271|1285|1361|1440|1490|1524|1602|1636|1805|1839|1901|1906|1910|1958|1960|2013|2192|2247|2263|2264|2268|2277|2294|2615|2621|2624|2627|2697|2719|2852|2869|2920|2921|3055|3071|3084|3133|3142|3164|3202|3373|3400|3491|3553|3569|3579|3727|3851|3977|4091|4332|4881|4883|4915|4921|4969|5155|5196|5…	ACVRL1|ADARB1|AGER|AGTR1|AGTR2|ANGPT1|AQP1|ATF3|AVPR2|BCHE|BMP2|BMPR2|BMX|BST1|KLF9|BTK|C5AR1|CAV1|CAV2|CCND2|CD33|CDH5|CDH13|CDKN2B|CLC|CNN1|CNTFR|COL4A3|CPB2|CSF3|CTGF|CX3CR1|DACH1|ACE|DPT|HBEGF|S1PR1|EDN1|EDNRB|EGR1|EGR3|EMP2|FBLN1|FGF2|FGFR2|FGFR4|FGR|VEGFD|FOXF1|LRRC32|GAS6|GATA2|GATA6|GJA1|GPC3|GPER1|GRK5|CXCL2|CXCL3|HCK|NCKAP1L|NRG1|HLA-E|HLX|NR4A1|HOXA5|HYAL1|ID4|CYR61|IL1B|IL6|CXCR2|JUND…
GO:0007155	3.83854e-17	1	154	1343	cell adhesion	BP	2.83193e-14	94|177|246|284|395|482|650|660|667|683|857|945|946|947|948|976|1003|1012|1178|1285|1305|1326|1490|1524|1805|1842|1901|1960|2013|2015|2022|2192|2294|2358|2615|2621|2824|2995|3036|3043|3055|3071|3133|3142|3373|3384|3491|3553|3569|3575|3730|4008|4045|4091|4239|4628|4739|4921|4973|4974|5010|5098|5175|5239|5295|5581|5588|5592|5789|5800|6092|6347|6387|6401|6403|6404|6441|6614|6693|6935|7010|7048|7122|7…	ACVRL1|AGER|ALOX15|ANGPT1|ARHGAP6|ATP1B2|BMP2|BMX|DST|BST1|CAV1|CD33|SIGLEC6|CD34|CD36|ADGRE5|CDH5|CDH13|CLC|COL4A3|COL13A1|MAP3K8|CTGF|CX3CR1|DPT|ECM2|S1PR1|EGR3|EMP2|ADGRE1|ENG|FBLN1|FOXF1|FPR2|LRRC32|GAS6|GPM6B|GYPC|HAS1|HBB|HCK|NCKAP1L|HLA-E|HLX|HYAL1|ICAM2|CYR61|IL1B|IL6|IL7R|ANOS1|LMO7|LSAMP|SMAD6|MFAP4|MYH10|NEDD9|DDR2|OLR1|OMG|CLDN11|PCDHGC3|PECAM1|PGM5|PIK3R1|PRKCE|PRKCQ|PRKG1|PTPRD|PTPR…
GO:0009653	4.20199e-17	1	232	2380	anatomical structure morphogenesis	BP	2.95915e-14	94|104|186|187|284|306|322|358|627|650|659|728|729|845|857|947|948|1012|1073|1285|1305|1361|1490|1524|1536|1601|1634|1808|1839|1843|1901|1906|1959|1960|2013|2022|2034|2078|2115|2192|2202|2247|2263|2268|2273|2277|2294|2313|2549|2624|2627|2674|2697|2702|2719|2823|2828|3055|3084|3142|3164|3201|3202|3340|3373|3400|3491|3553|3569|3575|3730|3899|3953|3988|4091|4211|4222|4223|4327|4628|4629|4638|4855|48…	ACVRL1|ADARB1|AGTR2|APLNR|ANGPT1|ANXA3|APBB1|AQP1|BDNF|BMP2|BMPR2|C5AR1|C6|CASQ2|CAV1|CD34|CD36|CDH13|CFL2|COL4A3|COL13A1|CPB2|CTGF|CX3CR1|CYBB|DAB2|DCN|DPYSL2|HBEGF|DUSP1|S1PR1|EDN1|EGR2|EGR3|EMP2|ENG|EPAS1|ERG|ETV1|FBLN1|EFEMP1|FGF2|FGFR2|FGR|FHL1|VEGFD|FOXF1|FLI1|GAB1|GATA2|GATA6|GFRA1|GJA1|GJA5|GPC3|GPM6A|GPR4|HCK|NRG1|HLX|NR4A1|HOXA4|HOXA5|NDST1|HYAL1|ID4|CYR61|IL1B|IL6|IL7R|ANOS1|AFF3|LEPR|…
GO:0022610	6.02945e-17	1	154	1350	biological adhesion	BP	4.06149e-14	94|177|246|284|395|482|650|660|667|683|857|945|946|947|948|976|1003|1012|1178|1285|1305|1326|1490|1524|1805|1842|1901|1960|2013|2015|2022|2192|2294|2358|2615|2621|2824|2995|3036|3043|3055|3071|3133|3142|3373|3384|3491|3553|3569|3575|3730|4008|4045|4091|4239|4628|4739|4921|4973|4974|5010|5098|5175|5239|5295|5581|5588|5592|5789|5800|6092|6347|6387|6401|6403|6404|6441|6614|6693|6935|7010|7048|7122|7…	ACVRL1|AGER|ALOX15|ANGPT1|ARHGAP6|ATP1B2|BMP2|BMX|DST|BST1|CAV1|CD33|SIGLEC6|CD34|CD36|ADGRE5|CDH5|CDH13|CLC|COL4A3|COL13A1|MAP3K8|CTGF|CX3CR1|DPT|ECM2|S1PR1|EGR3|EMP2|ADGRE1|ENG|FBLN1|FOXF1|FPR2|LRRC32|GAS6|GPM6B|GYPC|HAS1|HBB|HCK|NCKAP1L|HLA-E|HLX|HYAL1|ICAM2|CYR61|IL1B|IL6|IL7R|ANOS1|LMO7|LSAMP|SMAD6|MFAP4|MYH10|NEDD9|DDR2|OLR1|OMG|CLDN11|PCDHGC3|PECAM1|PGM5|PIK3R1|PRKCE|PRKCQ|PRKG1|PTPRD|PTPR…
GO:0007275	7.80234e-17	1	400	4997	multicellular organism development	BP	5.03673e-14	32|94|104|154|177|185|186|187|246|284|306|322|358|408|467|554|590|597|627|650|659|660|695|713|714|728|729|745|847|857|858|947|1003|1012|1030|1036|1073|1178|1268|1271|1285|1305|1316|1361|1440|1490|1524|1536|1601|1602|1634|1636|1808|1827|1839|1843|1901|1906|1910|1958|1959|1960|2009|2012|2013|2022|2034|2078|2115|2192|2202|2207|2247|2263|2273|2277|2294|2313|2353|2549|2621|2624|2627|2662|2674|2697|270…	ACACB|ACVRL1|ADARB1|ADRB2|AGER|AGTR1|AGTR2|APLNR|ALOX15|ANGPT1|ANXA3|APBB1|AQP1|ARRB1|ATF3|AVPR2|BCHE|BCL2A1|BDNF|BMP2|BMPR2|BMX|BTK|C1QB|C1QC|C5AR1|C6|MYRF|CAT|CAV1|CAV2|CD34|CDH5|CDH13|CDKN2B|CDO1|CFL2|CLC|CNR1|CNTFR|COL4A3|COL13A1|KLF6|CPB2|CSF3|CTGF|CX3CR1|CYBB|DAB2|DACH1|DCN|ACE|DPYSL2|RCAN1|HBEGF|DUSP1|S1PR1|EDN1|EDNRB|EGR1|EGR2|EGR3|EML1|EMP1|EMP2|ENG|EPAS1|ERG|ETV1|FBLN1|EFEMP1|FCER1G|FGF…
GO:0044767	8.43672e-17	1	447	5777	single-organism developmental process	BP	5.2284e-14	2|32|94|104|153|154|177|185|186|187|246|284|306|322|358|408|467|554|590|597|627|650|659|660|695|710|713|714|728|729|745|845|847|857|858|947|948|1003|1012|1030|1036|1073|1178|1268|1271|1285|1305|1316|1361|1410|1440|1490|1524|1536|1601|1602|1634|1636|1776|1808|1827|1839|1843|1901|1906|1910|1958|1959|1960|2009|2012|2013|2022|2034|2078|2115|2167|2192|2202|2207|2247|2263|2268|2273|2277|2294|2313|2353|…	A2M|ACACB|ACVRL1|ADARB1|ADRB1|ADRB2|AGER|AGTR1|AGTR2|APLNR|ALOX15|ANGPT1|ANXA3|APBB1|AQP1|ARRB1|ATF3|AVPR2|BCHE|BCL2A1|BDNF|BMP2|BMPR2|BMX|BTK|SERPING1|C1QB|C1QC|C5AR1|C6|MYRF|CASQ2|CAT|CAV1|CAV2|CD34|CD36|CDH5|CDH13|CDKN2B|CDO1|CFL2|CLC|CNR1|CNTFR|COL4A3|COL13A1|KLF6|CPB2|CRYAB|CSF3|CTGF|CX3CR1|CYBB|DAB2|DACH1|DCN|ACE|DNASE1L3|DPYSL2|RCAN1|HBEGF|DUSP1|S1PR1|EDN1|EDNRB|EGR1|EGR2|EGR3|EML1|EMP1|EM…
GO:0032502	1.51917e-16	1	451	5864	developmental process	BP	9.05249e-14	2|32|94|104|153|154|177|185|186|187|246|284|306|322|358|408|467|554|590|597|627|650|659|660|695|710|713|714|728|729|745|845|847|857|858|947|948|1003|1012|1030|1036|1073|1178|1268|1271|1285|1305|1316|1361|1410|1440|1490|1524|1536|1601|1602|1634|1636|1776|1808|1827|1839|1843|1901|1906|1910|1958|1959|1960|2009|2012|2013|2022|2034|2078|2115|2167|2171|2192|2202|2207|2247|2263|2268|2273|2277|2294|2313|…	A2M|ACACB|ACVRL1|ADARB1|ADRB1|ADRB2|AGER|AGTR1|AGTR2|APLNR|ALOX15|ANGPT1|ANXA3|APBB1|AQP1|ARRB1|ATF3|AVPR2|BCHE|BCL2A1|BDNF|BMP2|BMPR2|BMX|BTK|SERPING1|C1QB|C1QC|C5AR1|C6|MYRF|CASQ2|CAT|CAV1|CAV2|CD34|CD36|CDH5|CDH13|CDKN2B|CDO1|CFL2|CLC|CNR1|CNTFR|COL4A3|COL13A1|KLF6|CPB2|CRYAB|CSF3|CTGF|CX3CR1|CYBB|DAB2|DACH1|DCN|ACE|DNASE1L3|DPYSL2|RCAN1|HBEGF|DUSP1|S1PR1|EDN1|EDNRB|EGR1|EGR2|EGR3|EML1|EMP1|EM…
GO:0023052	1.72875e-16	1	468	6249	signaling	BP	9.91983e-14	2|94|104|153|154|177|181|185|186|187|246|284|322|395|408|467|477|482|554|590|627|650|659|660|667|683|695|712|728|845|847|857|858|945|946|947|948|976|1003|1012|1030|1268|1271|1285|1326|1410|1440|1490|1524|1536|1601|1634|1808|1827|1839|1843|1850|1901|1906|1910|1958|1959|1960|2013|2015|2022|2034|2040|2078|2159|2192|2202|2203|2206|2207|2214|2219|2247|2263|2264|2268|2277|2294|2353|2357|2358|2532|2549|…	A2M|ACVRL1|ADARB1|ADRB1|ADRB2|AGER|AGRP|AGTR1|AGTR2|APLNR|ALOX15|ANGPT1|APBB1|ARHGAP6|ARRB1|ATF3|ATP1A2|ATP1B2|AVPR2|BCHE|BDNF|BMP2|BMPR2|BMX|DST|BST1|BTK|C1QA|C5AR1|CASQ2|CAT|CAV1|CAV2|CD33|SIGLEC6|CD34|CD36|ADGRE5|CDH5|CDH13|CDKN2B|CNR1|CNTFR|COL4A3|MAP3K8|CRYAB|CSF3|CTGF|CX3CR1|CYBB|DAB2|DCN|DPYSL2|RCAN1|HBEGF|DUSP1|DUSP8|S1PR1|EDN1|EDNRB|EGR1|EGR2|EGR3|EMP2|ADGRE1|ENG|EPAS1|STOM|ERG|F10|FBLN1…
GO:0044700	2.30021e-16	1	467	6242	single organism signaling	BP	1.27275e-13	2|94|104|153|154|177|181|185|186|187|246|284|322|395|408|467|477|482|554|590|627|650|659|660|667|683|695|712|728|845|847|857|858|945|946|947|948|976|1003|1012|1030|1268|1271|1285|1326|1410|1440|1490|1524|1536|1601|1634|1808|1827|1839|1843|1850|1901|1906|1910|1958|1959|1960|2013|2015|2022|2034|2040|2078|2159|2192|2202|2203|2206|2207|2214|2219|2247|2263|2264|2268|2277|2294|2353|2357|2358|2532|2549|…	A2M|ACVRL1|ADARB1|ADRB1|ADRB2|AGER|AGRP|AGTR1|AGTR2|APLNR|ALOX15|ANGPT1|APBB1|ARHGAP6|ARRB1|ATF3|ATP1A2|ATP1B2|AVPR2|BCHE|BDNF|BMP2|BMPR2|BMX|DST|BST1|BTK|C1QA|C5AR1|CASQ2|CAT|CAV1|CAV2|CD33|SIGLEC6|CD34|CD36|ADGRE5|CDH5|CDH13|CDKN2B|CNR1|CNTFR|COL4A3|MAP3K8|CRYAB|CSF3|CTGF|CX3CR1|CYBB|DAB2|DCN|DPYSL2|RCAN1|HBEGF|DUSP1|DUSP8|S1PR1|EDN1|EDNRB|EGR1|EGR2|EGR3|EMP2|ADGRE1|ENG|EPAS1|STOM|ERG|F10|FBLN1…
GO:0008283	6.40348e-16	1	190	1936	cell proliferation	BP	3.421e-13	94|104|177|185|186|284|358|467|554|590|650|659|660|683|687|695|728|857|858|894|945|947|1003|1012|1030|1178|1264|1271|1285|1361|1440|1490|1524|1601|1602|1636|1805|1839|1901|1906|1910|1958|1960|2009|2012|2013|2078|2192|2247|2263|2264|2268|2277|2294|2549|2615|2621|2624|2627|2697|2719|2852|2869|2920|2921|3055|3071|3084|3133|3142|3164|3202|3373|3400|3491|3553|3568|3569|3575|3579|3727|3851|3977|3988|40…	ACVRL1|ADARB1|AGER|AGTR1|AGTR2|ANGPT1|AQP1|ATF3|AVPR2|BCHE|BMP2|BMPR2|BMX|BST1|KLF9|BTK|C5AR1|CAV1|CAV2|CCND2|CD33|CD34|CDH5|CDH13|CDKN2B|CLC|CNN1|CNTFR|COL4A3|CPB2|CSF3|CTGF|CX3CR1|DAB2|DACH1|ACE|DPT|HBEGF|S1PR1|EDN1|EDNRB|EGR1|EGR3|EML1|EMP1|EMP2|ERG|FBLN1|FGF2|FGFR2|FGFR4|FGR|VEGFD|FOXF1|GAB1|LRRC32|GAS6|GATA2|GATA6|GJA1|GPC3|GPER1|GRK5|CXCL2|CXCL3|HCK|NCKAP1L|NRG1|HLA-E|HLX|NR4A1|HOXA5|HYAL1|…
GO:0007154	7.38559e-16	1	466	6267	cell communication	BP	3.81416e-13	2|94|104|153|154|177|181|185|186|187|246|284|322|395|408|467|477|482|554|590|627|650|659|660|667|683|695|712|728|845|847|857|858|945|946|947|948|976|1003|1012|1030|1268|1271|1285|1326|1410|1440|1490|1524|1536|1601|1634|1808|1827|1839|1843|1850|1901|1906|1910|1958|1959|1960|2013|2015|2022|2034|2040|2078|2159|2192|2202|2203|2206|2207|2214|2219|2247|2263|2264|2268|2277|2294|2353|2357|2358|2532|2549|…	A2M|ACVRL1|ADARB1|ADRB1|ADRB2|AGER|AGRP|AGTR1|AGTR2|APLNR|ALOX15|ANGPT1|APBB1|ARHGAP6|ARRB1|ATF3|ATP1A2|ATP1B2|AVPR2|BCHE|BDNF|BMP2|BMPR2|BMX|DST|BST1|BTK|C1QA|C5AR1|CASQ2|CAT|CAV1|CAV2|CD33|SIGLEC6|CD34|CD36|ADGRE5|CDH5|CDH13|CDKN2B|CNR1|CNTFR|COL4A3|MAP3K8|CRYAB|CSF3|CTGF|CX3CR1|CYBB|DAB2|DCN|DPYSL2|RCAN1|HBEGF|DUSP1|DUSP8|S1PR1|EDN1|EDNRB|EGR1|EGR2|EGR3|EMP2|ADGRE1|ENG|EPAS1|STOM|ERG|F10|FBLN1…
GO:1901342	1.65685e-15	1	49	239	regulation of vasculature development	BP	8.10276e-13	94|306|358|728|729|947|1285|1524|1536|1634|1958|2013|2022|2247|2277|2624|2627|2828|2852|3202|3373|3553|3569|4223|4881|5155|5168|5196|5740|6237|6347|6369|7010|7048|7075|7128|8742|9037|9314|10266|23328|23493|23554|28984|55273|79812|90627|126393|641700	ACVRL1|ANXA3|AQP1|C5AR1|C6|CD34|COL4A3|CX3CR1|CYBB|DCN|EGR1|EMP2|ENG|FGF2|VEGFD|GATA2|GATA6|GPR4|GPER1|HOXA5|HYAL1|IL1B|IL6|MEOX2|NPR1|PDGFB|ENPP2|PF4|PTGIS|RRAS|CCL2|CCL24|TEK|TGFBR2|TIE1|TNFAIP3|TNFSF12|SEMA5A|KLF4|RAMP2|SASH1|HEY2|TSPAN12|RGCC|TMEM100|MMRN2|STARD13|HSPB6|ECSCR
GO:0048646	1.67358e-15	1	118	962	anatomical structure formation involved in morphogenesis	BP	8.10276e-13	94|284|306|358|659|728|729|845|857|947|948|1012|1073|1285|1490|1524|1536|1634|1843|1901|1906|1959|1960|2013|2022|2034|2078|2247|2263|2277|2294|2624|2627|2702|2828|3164|3202|3373|3491|3553|3569|3953|4211|4222|4223|4327|4628|4629|4855|4881|5168|5196|5740|5787|5950|5990|6237|6347|6369|6886|6909|6910|6926|6943|7010|7048|7049|7075|7111|7128|8013|8516|8742|9037|9314|9353|9496|9510|9839|10203|10266|1039…	ACVRL1|ANGPT1|ANXA3|AQP1|BMPR2|C5AR1|C6|CASQ2|CAV1|CD34|CD36|CDH13|CFL2|COL4A3|CTGF|CX3CR1|CYBB|DCN|DUSP1|S1PR1|EDN1|EGR2|EGR3|EMP2|ENG|EPAS1|ERG|FGF2|FGFR2|VEGFD|FOXF1|GATA2|GATA6|GJA5|GPR4|NR4A1|HOXA5|HYAL1|CYR61|IL1B|IL6|LEPR|MEIS1|MEOX1|MEOX2|MMP19|MYH10|MYH11|NOTCH4|NPR1|ENPP2|PF4|PTGIS|PTPRB|RBP4|RFX2|RRAS|CCL2|CCL24|TAL1|TBX2|TBX5|TBX3|TCF21|TEK|TGFBR2|TGFBR3|TIE1|TMOD1|TNFAIP3|NR4A3|ITGA8…
GO:0051240	2.19829e-15	1	154	1436	positive regulation of multicellular organismal process	BP	1.03206e-12	32|94|153|154|177|186|284|306|322|358|554|627|650|659|695|728|729|745|857|947|948|1268|1361|1440|1490|1524|1536|1601|1839|1906|1910|1958|1960|2022|2078|2207|2219|2247|2263|2268|2277|2353|2621|2624|2627|2690|2697|2702|2824|2852|3071|3084|3133|3142|3202|3373|3400|3491|3553|3569|3575|3727|4023|4881|4915|4921|5028|5155|5168|5196|5295|5468|5581|5588|5734|5740|5789|6092|6237|6347|6369|6387|6403|6505|65…	ACACB|ACVRL1|ADRB1|ADRB2|AGER|AGTR2|ANGPT1|ANXA3|APBB1|AQP1|AVPR2|BDNF|BMP2|BMPR2|BTK|C5AR1|C6|MYRF|CAV1|CD34|CD36|CNR1|CPB2|CSF3|CTGF|CX3CR1|CYBB|DAB2|HBEGF|EDN1|EDNRB|EGR1|EGR3|ENG|ERG|FCER1G|FCN1|FGF2|FGFR2|FGR|VEGFD|FOS|GAS6|GATA2|GATA6|GHR|GJA1|GJA5|GPM6B|GPER1|NCKAP1L|NRG1|HLA-E|HLX|HOXA5|HYAL1|ID4|CYR61|IL1B|IL6|IL7R|JUND|LPL|NPR1|NTRK2|DDR2|P2RY1|PDGFB|ENPP2|PF4|PIK3R1|PPARG|PRKCE|PRKCQ|P…
GO:0044699	2.27031e-15	1	837	13309	single-organism process	BP	1.03453e-12	2|21|32|33|54|94|104|125|153|154|177|181|185|186|187|203|216|240|241|246|284|306|322|341|358|361|366|395|408|467|477|482|554|590|597|627|650|659|660|667|683|687|695|710|712|713|714|728|729|730|745|761|762|820|845|847|857|858|894|945|946|947|948|968|976|1003|1012|1030|1036|1043|1073|1178|1262|1264|1268|1271|1285|1305|1316|1318|1326|1346|1361|1410|1440|1490|1511|1524|1536|1572|1580|1593|1601|1602|1…	A2M|ABCA3|ACACB|ACADL|ACP5|ACVRL1|ADARB1|ADH1B|ADRB1|ADRB2|AGER|AGRP|AGTR1|AGTR2|APLNR|AK1|ALDH1A1|ALOX5|ALOX5AP|ALOX15|ANGPT1|ANXA3|APBB1|APOC1|AQP1|AQP4|AQP9|ARHGAP6|ARRB1|ATF3|ATP1A2|ATP1B2|AVPR2|BCHE|BCL2A1|BDNF|BMP2|BMPR2|BMX|DST|BST1|KLF9|BTK|SERPING1|C1QA|C1QB|C1QC|C5AR1|C6|C7|MYRF|CA3|CA4|CAMP|CASQ2|CAT|CAV1|CAV2|CCND2|CD33|SIGLEC6|CD34|CD36|CD68|ADGRE5|CDH5|CDH13|CDKN2B|CDO1|CD52|CFL2|CL…
GO:0002376	2.97602e-15	1	243	2798	immune system process	BP	1.31735e-12	2|104|177|240|246|284|306|361|366|482|660|683|695|710|712|713|714|728|729|730|732|820|847|857|945|947|948|968|976|1030|1178|1268|1316|1326|1440|1511|1524|1536|1636|1675|1901|1906|1910|1958|1960|2009|2013|2015|2034|2040|2171|2206|2207|2214|2215|2219|2263|2268|2277|2294|2313|2352|2353|2357|2358|2615|2621|2624|2719|2852|2920|2921|2995|3043|3055|3071|3101|3133|3142|3202|3384|3553|3568|3569|3575|3577|…	A2M|ADARB1|AGER|ALOX5|ALOX15|ANGPT1|ANXA3|AQP4|AQP9|ATP1B2|BMX|BST1|BTK|SERPING1|C1QA|C1QB|C1QC|C5AR1|C6|C7|C8B|CAMP|CAT|CAV1|CD33|CD34|CD36|CD68|ADGRE5|CDKN2B|CLC|CNR1|KLF6|MAP3K8|CSF3|CTSG|CX3CR1|CYBB|ACE|CFD|S1PR1|EDN1|EDNRB|EGR1|EGR3|EML1|EMP2|ADGRE1|EPAS1|STOM|FABP5|MS4A2|FCER1G|FCGR3A|FCGR3B|FCN1|FGFR2|FGR|VEGFD|FOXF1|FLI1|FOLR3|FOS|FPR1|FPR2|LRRC32|GAS6|GATA2|GPC3|GPER1|CXCL2|CXCL3|GYPC|HB…
GO:0050793	4.77466e-15	1	213	2241	regulation of developmental process	BP	2.05483e-12	32|94|153|154|177|185|186|306|322|358|627|650|659|695|714|728|729|745|857|947|948|1003|1178|1268|1285|1361|1440|1490|1524|1536|1601|1634|1636|1808|1901|1906|1910|1958|1960|2013|2022|2078|2192|2202|2247|2263|2268|2277|2294|2353|2621|2624|2627|2662|2690|2697|2719|2824|2828|2852|3055|3071|3084|3142|3202|3373|3400|3491|3553|3569|3575|3727|4023|4211|4223|4481|4628|4855|4881|4915|4919|4921|4974|5155|51…	ACACB|ACVRL1|ADRB1|ADRB2|AGER|AGTR1|AGTR2|ANXA3|APBB1|AQP1|BDNF|BMP2|BMPR2|BTK|C1QC|C5AR1|C6|MYRF|CAV1|CD34|CD36|CDH5|CLC|CNR1|COL4A3|CPB2|CSF3|CTGF|CX3CR1|CYBB|DAB2|DCN|ACE|DPYSL2|S1PR1|EDN1|EDNRB|EGR1|EGR3|EMP2|ENG|ERG|FBLN1|EFEMP1|FGF2|FGFR2|FGR|VEGFD|FOXF1|FOS|GAS6|GATA2|GATA6|GDF10|GHR|GJA1|GPC3|GPM6B|GPR4|GPER1|HCK|NCKAP1L|NRG1|HLX|HOXA5|HYAL1|ID4|CYR61|IL1B|IL6|IL7R|JUND|LPL|MEIS1|MEOX2|MS…
GO:0048869	5.0984e-15	1	327	3978	cellular developmental process	BP	2.13485e-12	2|94|104|153|154|177|185|186|284|322|467|590|627|650|659|660|695|714|745|845|847|857|858|947|948|1003|1030|1073|1268|1305|1316|1440|1490|1524|1601|1636|1776|1808|1901|1906|1910|1958|1959|1960|2009|2013|2022|2034|2078|2115|2167|2192|2202|2207|2247|2263|2268|2273|2277|2294|2313|2353|2549|2621|2624|2627|2662|2674|2697|2719|2823|2824|2828|2852|2869|3055|3071|3084|3142|3164|3202|3400|3491|3553|3569|35…	A2M|ACVRL1|ADARB1|ADRB1|ADRB2|AGER|AGTR1|AGTR2|ANGPT1|APBB1|ATF3|BCHE|BDNF|BMP2|BMPR2|BMX|BTK|C1QC|MYRF|CASQ2|CAT|CAV1|CAV2|CD34|CD36|CDH5|CDKN2B|CFL2|CNR1|COL13A1|KLF6|CSF3|CTGF|CX3CR1|DAB2|ACE|DNASE1L3|DPYSL2|S1PR1|EDN1|EDNRB|EGR1|EGR2|EGR3|EML1|EMP2|ENG|EPAS1|ERG|ETV1|FABP4|FBLN1|EFEMP1|FCER1G|FGF2|FGFR2|FGR|FHL1|VEGFD|FOXF1|FLI1|FOS|GAB1|GAS6|GATA2|GATA6|GDF10|GFRA1|GJA1|GPC3|GPM6A|GPM6B|GPR4…
GO:0007165	9.89619e-15	1	428	5744	signal transduction	BP	4.03478e-12	2|94|153|154|177|181|185|186|187|246|284|322|395|408|467|477|554|627|650|659|660|667|683|695|728|845|847|857|858|945|947|948|976|1003|1012|1030|1268|1271|1285|1326|1410|1440|1490|1524|1536|1601|1634|1808|1827|1839|1843|1850|1901|1906|1910|1958|2013|2015|2022|2034|2040|2078|2159|2192|2202|2203|2206|2207|2214|2219|2247|2263|2264|2268|2277|2294|2353|2357|2358|2532|2549|2621|2624|2627|2662|2674|2690|…	A2M|ACVRL1|ADRB1|ADRB2|AGER|AGRP|AGTR1|AGTR2|APLNR|ALOX15|ANGPT1|APBB1|ARHGAP6|ARRB1|ATF3|ATP1A2|AVPR2|BDNF|BMP2|BMPR2|BMX|DST|BST1|BTK|C5AR1|CASQ2|CAT|CAV1|CAV2|CD33|CD34|CD36|ADGRE5|CDH5|CDH13|CDKN2B|CNR1|CNTFR|COL4A3|MAP3K8|CRYAB|CSF3|CTGF|CX3CR1|CYBB|DAB2|DCN|DPYSL2|RCAN1|HBEGF|DUSP1|DUSP8|S1PR1|EDN1|EDNRB|EGR1|EMP2|ADGRE1|ENG|EPAS1|STOM|ERG|F10|FBLN1|EFEMP1|FBP1|MS4A2|FCER1G|FCGR3A|FCN1|FGF2…
GO:0048584	1.12362e-14	1	196	2080	positive regulation of response to stimulus	BP	4.46367e-12	2|94|153|154|177|185|186|246|284|322|395|408|467|627|650|659|695|710|712|713|714|728|729|730|732|847|857|858|948|1012|1030|1268|1326|1361|1440|1490|1511|1601|1634|1675|1839|1901|1906|2013|2022|2159|2167|2207|2214|2219|2247|2263|2264|2268|2277|2357|2358|2549|2621|2624|2627|2662|2690|2697|2719|2828|2852|2920|2921|3055|3071|3084|3133|3142|3384|3491|3553|3569|3949|4023|4242|4332|4616|4638|4915|5028|5…	A2M|ACVRL1|ADRB1|ADRB2|AGER|AGTR1|AGTR2|ALOX15|ANGPT1|APBB1|ARHGAP6|ARRB1|ATF3|BDNF|BMP2|BMPR2|BTK|SERPING1|C1QA|C1QB|C1QC|C5AR1|C6|C7|C8B|CAT|CAV1|CAV2|CD36|CDH13|CDKN2B|CNR1|MAP3K8|CPB2|CSF3|CTGF|CTSG|DAB2|DCN|CFD|HBEGF|S1PR1|EDN1|EMP2|ENG|F10|FABP4|FCER1G|FCGR3A|FCN1|FGF2|FGFR2|FGFR4|FGR|VEGFD|FPR1|FPR2|GAB1|GAS6|GATA2|GATA6|GDF10|GHR|GJA1|GPC3|GPR4|GPER1|CXCL2|CXCL3|HCK|NCKAP1L|NRG1|HLA-E|HLX…
GO:2000026	1.88394e-14	1	172	1706	regulation of multicellular organismal development	BP	7.29696e-12	32|94|154|177|186|306|322|358|627|650|659|695|714|728|729|745|857|947|1003|1178|1268|1285|1361|1440|1490|1524|1536|1601|1634|1636|1808|1901|1906|1910|1958|1960|2013|2022|2202|2247|2263|2277|2353|2621|2624|2627|2697|2719|2824|2828|2852|3071|3084|3142|3202|3373|3400|3491|3553|3569|3575|4211|4223|4855|4881|4915|4919|4921|4974|5155|5168|5196|5295|5376|5468|5740|5789|5800|5950|6092|6237|6347|6369|6383…	ACACB|ACVRL1|ADRB2|AGER|AGTR2|ANXA3|APBB1|AQP1|BDNF|BMP2|BMPR2|BTK|C1QC|C5AR1|C6|MYRF|CAV1|CD34|CDH5|CLC|CNR1|COL4A3|CPB2|CSF3|CTGF|CX3CR1|CYBB|DAB2|DCN|ACE|DPYSL2|S1PR1|EDN1|EDNRB|EGR1|EGR3|EMP2|ENG|EFEMP1|FGF2|FGFR2|VEGFD|FOS|GAS6|GATA2|GATA6|GJA1|GPC3|GPM6B|GPR4|GPER1|NCKAP1L|NRG1|HLX|HOXA5|HYAL1|ID4|CYR61|IL1B|IL6|IL7R|MEIS1|MEOX2|NOTCH4|NPR1|NTRK2|ROR1|DDR2|OMG|PDGFB|ENPP2|PF4|PIK3R1|PMP22|P…
GO:0006935	1.95979e-14	1	77	551	chemotaxis	BP	7.40563e-12	177|185|284|627|659|683|728|1012|1524|1808|1839|1901|1906|1910|1959|1960|2115|2207|2247|2277|2357|2358|2549|2621|2674|2920|2921|3071|3084|3164|3491|3553|3569|3577|3579|3730|4628|5155|5168|5196|5295|5319|5473|5588|5800|6092|6283|6347|6358|6368|6369|6387|6441|6586|6693|6711|8013|9034|9037|9046|9353|9638|9647|9732|23604|23767|51554|53358|57556|57580|59277|83700|85358|89780|120425|220164|641700	AGER|AGTR1|ANGPT1|BDNF|BMPR2|BST1|C5AR1|CDH13|CX3CR1|DPYSL2|HBEGF|S1PR1|EDN1|EDNRB|EGR2|EGR3|ETV1|FCER1G|FGF2|VEGFD|FPR1|FPR2|GAB1|GAS6|GFRA1|CXCL2|CXCL3|NCKAP1L|NRG1|NR4A1|CYR61|IL1B|IL6|CXCR1|CXCR2|ANOS1|MYH10|PDGFB|ENPP2|PF4|PIK3R1|PLA2G1B|PPBP|PRKCQ|PTPRO|ROBO2|S100A12|CCL2|CCL14|CCL23|CCL24|CXCL12|SFTPD|SLIT3|SPN|SPTBN1|NR4A3|CCRL2|SEMA5A|DOK2|SLIT2|FEZ1|PPM1F|DOCK4|DAPK2|FLRT3|ACKR4|SHC3|SE…
GO:0007166	2.06667e-14	1	241	2703	cell surface receptor signaling pathway	BP	7.62357e-12	94|154|177|186|284|467|627|650|659|660|667|683|695|728|857|858|948|976|1003|1012|1030|1271|1285|1440|1490|1524|1536|1601|1634|1839|1906|1910|1958|2013|2015|2022|2202|2206|2207|2214|2219|2247|2263|2264|2268|2277|2294|2353|2357|2358|2532|2549|2621|2624|2627|2662|2674|2690|2719|2852|2869|2890|2920|2921|3055|3071|3084|3133|3340|3384|3491|3553|3563|3568|3569|3575|3577|3579|3730|3953|3977|4091|4093|424…	ACVRL1|ADRB2|AGER|AGTR2|ANGPT1|ATF3|BDNF|BMP2|BMPR2|BMX|DST|BST1|BTK|C5AR1|CAV1|CAV2|CD36|ADGRE5|CDH5|CDH13|CDKN2B|CNTFR|COL4A3|CSF3|CTGF|CX3CR1|CYBB|DAB2|DCN|HBEGF|EDN1|EDNRB|EGR1|EMP2|ADGRE1|ENG|EFEMP1|MS4A2|FCER1G|FCGR3A|FCN1|FGF2|FGFR2|FGFR4|FGR|VEGFD|FOXF1|FOS|FPR1|FPR2|ACKR1|GAB1|GAS6|GATA2|GATA6|GDF10|GFRA1|GHR|GPC3|GPER1|GRK5|GRIA1|CXCL2|CXCL3|HCK|NCKAP1L|NRG1|HLA-E|NDST1|ICAM2|CYR61|IL1B…
GO:0042330	2.12527e-14	1	77	552	taxis	BP	7.65741e-12	177|185|284|627|659|683|728|1012|1524|1808|1839|1901|1906|1910|1959|1960|2115|2207|2247|2277|2357|2358|2549|2621|2674|2920|2921|3071|3084|3164|3491|3553|3569|3577|3579|3730|4628|5155|5168|5196|5295|5319|5473|5588|5800|6092|6283|6347|6358|6368|6369|6387|6441|6586|6693|6711|8013|9034|9037|9046|9353|9638|9647|9732|23604|23767|51554|53358|57556|57580|59277|83700|85358|89780|120425|220164|641700	AGER|AGTR1|ANGPT1|BDNF|BMPR2|BST1|C5AR1|CDH13|CX3CR1|DPYSL2|HBEGF|S1PR1|EDN1|EDNRB|EGR2|EGR3|ETV1|FCER1G|FGF2|VEGFD|FPR1|FPR2|GAB1|GAS6|GFRA1|CXCL2|CXCL3|NCKAP1L|NRG1|NR4A1|CYR61|IL1B|IL6|CXCR1|CXCR2|ANOS1|MYH10|PDGFB|ENPP2|PF4|PIK3R1|PLA2G1B|PPBP|PRKCQ|PTPRO|ROBO2|S100A12|CCL2|CCL14|CCL23|CCL24|CXCL12|SFTPD|SLIT3|SPN|SPTBN1|NR4A3|CCRL2|SEMA5A|DOK2|SLIT2|FEZ1|PPM1F|DOCK4|DAPK2|FLRT3|ACKR4|SHC3|SE…
GO:0045765	4.24399e-14	1	44	215	regulation of angiogenesis	BP	1.49437e-11	94|306|358|728|729|947|1285|1524|1536|1634|2013|2022|2247|2277|2624|2627|2828|3202|3373|3553|3569|4223|4881|5168|5196|5740|6237|6347|6369|7010|7048|7075|7128|8742|9037|9314|10266|23328|23554|28984|79812|90627|126393|641700	ACVRL1|ANXA3|AQP1|C5AR1|C6|CD34|COL4A3|CX3CR1|CYBB|DCN|EMP2|ENG|FGF2|VEGFD|GATA2|GATA6|GPR4|HOXA5|HYAL1|IL1B|IL6|MEOX2|NPR1|ENPP2|PF4|PTGIS|RRAS|CCL2|CCL24|TEK|TGFBR2|TIE1|TNFAIP3|TNFSF12|SEMA5A|KLF4|RAMP2|SASH1|TSPAN12|RGCC|MMRN2|STARD13|HSPB6|ECSCR
GO:0046903	4.55222e-14	1	154	1520	secretion	BP	1.56728e-11	2|185|186|240|284|306|322|358|366|408|554|683|695|710|728|820|847|857|945|947|948|968|976|1036|1268|1361|1490|1511|1536|1636|1675|1906|1910|2022|2040|2157|2171|2207|2215|2219|2268|2277|2294|2352|2357|2358|2615|2621|2624|2697|2702|2852|3043|3055|3071|3084|3101|3133|3553|3569|3577|3579|4023|4129|4311|4332|4628|4881|4883|4915|4973|5023|5028|5155|5175|5196|5199|5319|5320|5322|5473|5581|5627|5734|5787…	A2M|AGTR1|AGTR2|ALOX5|ANGPT1|ANXA3|APBB1|AQP1|AQP9|ARRB1|AVPR2|BST1|BTK|SERPING1|C5AR1|CAMP|CAT|CAV1|CD33|CD34|CD36|CD68|ADGRE5|CDO1|CNR1|CPB2|CTGF|CTSG|CYBB|ACE|CFD|EDN1|EDNRB|ENG|STOM|F8|FABP5|FCER1G|FCGR3B|FCN1|FGR|VEGFD|FOXF1|FOLR3|FPR1|FPR2|LRRC32|GAS6|GATA2|GJA1|GJA5|GPER1|HBB|HCK|NCKAP1L|NRG1|HK3|HLA-E|IL1B|IL6|CXCR1|CXCR2|LPL|MAOB|MME|MNDA|MYH10|NPR1|NPR3|NTRK2|OLR1|P2RX1|P2RY1|PDGFB|PECA…
GO:0006952	4.70239e-14	1	148	1518	defense response	BP	1.58379e-11	2|104|177|185|186|240|246|306|361|650|660|683|695|710|712|713|714|728|729|730|732|820|857|948|976|1036|1268|1511|1524|1536|1675|1906|1910|1958|2157|2167|2206|2207|2219|2268|2294|2353|2357|2358|2532|2697|2852|2920|2921|3055|3133|3340|3373|3384|3553|3568|3569|3577|3579|3949|3988|4023|4332|4360|4688|4973|5023|5138|5196|5199|5319|5320|5468|5473|5551|5581|5588|5627|5734|5740|5806|6283|6347|6358|6368|6…	A2M|ADARB1|AGER|AGTR1|AGTR2|ALOX5|ALOX15|ANXA3|AQP4|BMP2|BMX|BST1|BTK|SERPING1|C1QA|C1QB|C1QC|C5AR1|C6|C7|C8B|CAMP|CAV1|CD36|ADGRE5|CDO1|CNR1|CTSG|CX3CR1|CYBB|CFD|EDN1|EDNRB|EGR1|F8|FABP4|MS4A2|FCER1G|FCN1|FGR|FOXF1|FOS|FPR1|FPR2|ACKR1|GJA1|GPER1|CXCL2|CXCL3|HCK|HLA-E|NDST1|HYAL1|ICAM2|IL1B|IL5RA|IL6|CXCR1|CXCR2|LDLR|LIPA|LPL|MNDA|MRC1|NCF2|OLR1|P2RX1|PDE2A|PF4|CFP|PLA2G1B|PLA2G2A|PPARG|PPBP|PRF1…
GO:0070887	6.38194e-14	1	236	2707	cellular response to chemical stimulus	BP	2.10373e-11	94|177|181|185|186|241|246|284|358|361|366|408|467|477|554|650|659|683|687|695|728|845|847|857|858|947|948|968|1003|1012|1030|1271|1361|1440|1490|1511|1524|1536|1572|1601|1634|1839|1843|1901|1906|1910|1958|1959|1960|2022|2034|2167|2203|2207|2247|2263|2264|2277|2294|2327|2328|2353|2354|2357|2358|2532|2549|2621|2627|2662|2690|2719|2791|2819|2852|2920|2921|3036|3055|3071|3133|3164|3340|3373|3491|355…	ACVRL1|AGER|AGRP|AGTR1|AGTR2|ALOX5AP|ALOX15|ANGPT1|AQP1|AQP4|AQP9|ARRB1|ATF3|ATP1A2|AVPR2|BMP2|BMPR2|BST1|KLF9|BTK|C5AR1|CASQ2|CAT|CAV1|CAV2|CD34|CD36|CD68|CDH5|CDH13|CDKN2B|CNTFR|CPB2|CSF3|CTGF|CTSG|CX3CR1|CYBB|CYP2F1|DAB2|DCN|HBEGF|DUSP1|S1PR1|EDN1|EDNRB|EGR1|EGR2|EGR3|ENG|EPAS1|FABP4|FBP1|FCER1G|FGF2|FGFR2|FGFR4|VEGFD|FOXF1|FMO2|FMO3|FOS|FOSB|FPR1|FPR2|ACKR1|GAB1|GAS6|GATA6|GDF10|GHR|GPC3|GNG1…
GO:0051270	7.59168e-14	1	99	794	regulation of cellular component movement	BP	2.45037e-11	94|104|186|284|306|477|650|659|683|728|857|1012|1524|1601|1602|1634|1636|1839|1901|1906|2013|2022|2159|2192|2247|2268|2277|2294|2549|2621|2702|2852|2920|2921|3036|3071|3084|3373|3491|3569|4223|4638|4921|5155|5168|5196|5295|5473|5581|5734|5800|6237|6347|6369|6387|6403|6446|6910|7010|7048|7049|7075|7134|8434|8613|9037|9079|9314|9353|9647|9732|9806|10395|10630|23328|23604|28984|54538|55130|56729|575…	ACVRL1|ADARB1|AGTR2|ANGPT1|ANXA3|ATP1A2|BMP2|BMPR2|BST1|C5AR1|CAV1|CDH13|CX3CR1|DAB2|DACH1|DCN|ACE|HBEGF|S1PR1|EDN1|EMP2|ENG|F10|FBLN1|FGF2|FGR|VEGFD|FOXF1|GAB1|GAS6|GJA5|GPER1|CXCL2|CXCL3|HAS1|NCKAP1L|NRG1|HYAL1|CYR61|IL6|MEOX2|MYLK|DDR2|PDGFB|ENPP2|PF4|PIK3R1|PPBP|PRKCE|PTGER4|PTPRO|RRAS|CCL2|CCL24|CXCL12|SELP|SGK1|TBX5|TEK|TGFBR2|TGFBR3|TIE1|TNNC1|RECK|PLPP3|SEMA5A|LDB2|KLF4|SLIT2|PPM1F|DOCK4|…
GO:0030154	1.12286e-13	1	310	3807	cell differentiation	BP	3.5503e-11	2|94|104|153|154|177|185|186|284|322|467|590|627|650|659|660|695|714|745|845|847|857|858|947|948|1003|1030|1073|1268|1305|1316|1440|1490|1524|1601|1636|1776|1808|1901|1906|1910|1958|1959|1960|2009|2013|2022|2034|2078|2115|2167|2192|2202|2207|2247|2263|2268|2273|2277|2294|2313|2353|2549|2621|2624|2627|2662|2674|2697|2719|2823|2824|2828|2852|2869|3055|3071|3084|3142|3164|3202|3400|3491|3553|3569|35…	A2M|ACVRL1|ADARB1|ADRB1|ADRB2|AGER|AGTR1|AGTR2|ANGPT1|APBB1|ATF3|BCHE|BDNF|BMP2|BMPR2|BMX|BTK|C1QC|MYRF|CASQ2|CAT|CAV1|CAV2|CD34|CD36|CDH5|CDKN2B|CFL2|CNR1|COL13A1|KLF6|CSF3|CTGF|CX3CR1|DAB2|ACE|DNASE1L3|DPYSL2|S1PR1|EDN1|EDNRB|EGR1|EGR2|EGR3|EML1|EMP2|ENG|EPAS1|ERG|ETV1|FABP4|FBLN1|EFEMP1|FCER1G|FGF2|FGFR2|FGR|FHL1|VEGFD|FOXF1|FLI1|FOS|GAB1|GAS6|GATA2|GATA6|GDF10|GFRA1|GJA1|GPC3|GPM6A|GPM6B|GPR4…
GO:0032101	2.3395e-13	1	86	684	regulation of response to external stimulus	BP	7.24918e-11	2|177|185|659|683|695|710|728|729|730|732|857|947|948|1012|1268|1361|1524|1901|1906|1910|2160|2167|2207|2247|2277|2294|2621|2697|2852|2920|2921|3055|3071|3553|3569|3949|4023|5138|5155|5196|5199|5320|5468|5473|5588|5592|5627|5734|5740|5800|6092|6283|6347|6369|6387|6401|6403|6693|7010|7048|7056|7099|7128|7356|9021|9037|9173|9314|9353|9450|9647|10203|23328|23604|25959|58189|83700|84959|89780|90102|9…	A2M|AGER|AGTR1|BMPR2|BST1|BTK|SERPING1|C5AR1|C6|C7|C8B|CAV1|CD34|CD36|CDH13|CNR1|CPB2|CX3CR1|S1PR1|EDN1|EDNRB|F11|FABP4|FCER1G|FGF2|VEGFD|FOXF1|GAS6|GJA1|GPER1|CXCL2|CXCL3|HCK|NCKAP1L|IL1B|IL6|LDLR|LPL|PDE2A|PDGFB|PF4|CFP|PLA2G2A|PPARG|PPBP|PRKCQ|PRKG1|PROS1|PTGER4|PTGIS|PTPRO|ROBO2|S100A12|CCL2|CCL24|CXCL12|SELE|SELP|SPN|TEK|TGFBR2|THBD|TLR4|TNFAIP3|SCGB1A1|SOCS3|SEMA5A|IL1RL1|KLF4|SLIT2|LY86|PP…
GO:0048513	3.40096e-13	1	269	3235	animal organ development	BP	1.01658e-10	32|94|104|154|177|185|186|187|246|284|306|358|408|467|554|597|650|659|660|695|713|714|728|847|857|858|947|1030|1036|1073|1271|1285|1305|1316|1361|1440|1490|1601|1634|1636|1808|1839|1901|1906|1910|1958|1959|1960|2009|2022|2034|2078|2115|2202|2207|2247|2263|2273|2294|2313|2353|2549|2621|2624|2627|2697|2702|2719|2823|2824|2828|2852|3071|3084|3142|3202|3340|3373|3400|3491|3569|3575|3777|3851|3953|398…	ACACB|ACVRL1|ADARB1|ADRB2|AGER|AGTR1|AGTR2|APLNR|ALOX15|ANGPT1|ANXA3|AQP1|ARRB1|ATF3|AVPR2|BCL2A1|BMP2|BMPR2|BMX|BTK|C1QB|C1QC|C5AR1|CAT|CAV1|CAV2|CD34|CDKN2B|CDO1|CFL2|CNTFR|COL4A3|COL13A1|KLF6|CPB2|CSF3|CTGF|DAB2|DCN|ACE|DPYSL2|HBEGF|S1PR1|EDN1|EDNRB|EGR1|EGR2|EGR3|EML1|ENG|EPAS1|ERG|ETV1|EFEMP1|FCER1G|FGF2|FGFR2|FHL1|FOXF1|FLI1|FOS|GAB1|GAS6|GATA2|GATA6|GJA1|GJA5|GPC3|GPM6A|GPM6B|GPR4|GPER1|NC…
GO:0040012	3.41202e-13	1	97	792	regulation of locomotion	BP	1.01658e-10	94|104|177|186|284|306|650|659|683|728|858|1012|1524|1601|1602|1634|1636|1839|1901|1906|2013|2022|2159|2192|2247|2268|2277|2294|2549|2621|2852|2920|2921|3036|3071|3084|3373|3491|3569|4223|4638|4921|5155|5168|5196|5295|5473|5581|5734|5800|6092|6237|6347|6369|6387|6403|6446|6622|6910|7010|7048|7075|8434|8613|9037|9079|9314|9353|9647|9732|9806|10395|23328|23604|28984|54538|56729|57580|64411|65009|79…	ACVRL1|ADARB1|AGER|AGTR2|ANGPT1|ANXA3|BMP2|BMPR2|BST1|C5AR1|CAV2|CDH13|CX3CR1|DAB2|DACH1|DCN|ACE|HBEGF|S1PR1|EDN1|EMP2|ENG|F10|FBLN1|FGF2|FGR|VEGFD|FOXF1|GAB1|GAS6|GPER1|CXCL2|CXCL3|HAS1|NCKAP1L|NRG1|HYAL1|CYR61|IL6|MEOX2|MYLK|DDR2|PDGFB|ENPP2|PF4|PIK3R1|PPBP|PRKCE|PTGER4|PTPRO|ROBO2|RRAS|CCL2|CCL24|CXCL12|SELP|SGK1|SNCA|TBX5|TEK|TGFBR2|TIE1|RECK|PLPP3|SEMA5A|LDB2|KLF4|SLIT2|PPM1F|DOCK4|SPOCK2|DL…
GO:0003013	3.66348e-13	1	71	500	circulatory system process	BP	1.07091e-10	94|153|154|185|186|284|477|482|554|659|710|845|857|947|1268|1285|1359|1490|1511|1636|1674|1827|1839|1906|1910|2013|2034|2313|2621|2697|2702|2852|3043|3762|3777|4223|4311|4881|4883|4973|5023|5028|5138|5155|5348|5468|5592|5800|6323|6330|6387|6445|6446|6505|6532|6909|7010|7134|7136|8654|8862|9254|9353|9732|10266|10268|10659|23493|27129|53826|57493	ACVRL1|ADRB1|ADRB2|AGTR1|AGTR2|ANGPT1|ATP1A2|ATP1B2|AVPR2|BMPR2|SERPING1|CASQ2|CAV1|CD34|CNR1|COL4A3|CPA3|CTGF|CTSG|ACE|DES|RCAN1|HBEGF|EDN1|EDNRB|EMP2|EPAS1|FLI1|GAS6|GJA1|GJA5|GPER1|HBB|KCNJ5|KCNK3|MEOX2|MME|NPR1|NPR3|OLR1|P2RX1|P2RY1|PDE2A|PDGFB|FXYD1|PPARG|PRKG1|PTPRO|SCN1A|SCN4B|CXCL12|SGCG|SGK1|SLC1A1|SLC6A4|TBX2|TEK|TNNC1|TNNI2|PDE5A|APLN|CACNA2D2|SLIT2|DOCK4|RAMP2|RAMP3|CELF2|HEY2|HSPB7|F…
GO:0048518	4.85416e-13	1	402	5335	positive regulation of biological process	BP	1.39269e-10	2|32|94|104|153|154|177|181|185|186|246|284|306|322|341|358|395|408|467|482|554|627|650|659|683|695|710|712|713|714|728|729|730|732|745|845|847|857|858|894|947|948|1003|1012|1030|1073|1268|1271|1285|1316|1326|1361|1440|1490|1511|1524|1536|1601|1634|1636|1675|1839|1842|1843|1901|1906|1910|1958|1959|1960|2013|2022|2034|2040|2078|2115|2159|2160|2167|2192|2207|2214|2219|2247|2263|2264|2268|2273|2277|…	A2M|ACACB|ACVRL1|ADARB1|ADRB1|ADRB2|AGER|AGRP|AGTR1|AGTR2|ALOX15|ANGPT1|ANXA3|APBB1|APOC1|AQP1|ARHGAP6|ARRB1|ATF3|ATP1B2|AVPR2|BDNF|BMP2|BMPR2|BST1|BTK|SERPING1|C1QA|C1QB|C1QC|C5AR1|C6|C7|C8B|MYRF|CASQ2|CAT|CAV1|CAV2|CCND2|CD34|CD36|CDH5|CDH13|CDKN2B|CFL2|CNR1|CNTFR|COL4A3|KLF6|MAP3K8|CPB2|CSF3|CTGF|CTSG|CX3CR1|CYBB|DAB2|DCN|ACE|CFD|HBEGF|ECM2|DUSP1|S1PR1|EDN1|EDNRB|EGR1|EGR2|EGR3|EMP2|ENG|EPAS1|…
GO:0044763	4.98148e-13	1	700	10657	single-organism cellular process	BP	1.40324e-10	2|32|33|54|94|104|153|154|177|185|186|203|216|240|241|246|284|306|322|341|358|395|408|467|477|482|554|590|597|627|650|659|660|667|683|695|710|712|714|728|730|745|761|762|820|845|847|857|858|894|945|946|947|948|968|976|1003|1012|1030|1036|1043|1073|1178|1262|1264|1268|1271|1285|1305|1316|1318|1326|1361|1410|1440|1490|1511|1524|1536|1572|1593|1601|1602|1634|1636|1674|1675|1770|1776|1805|1808|1839|1…	A2M|ACACB|ACADL|ACP5|ACVRL1|ADARB1|ADRB1|ADRB2|AGER|AGTR1|AGTR2|AK1|ALDH1A1|ALOX5|ALOX5AP|ALOX15|ANGPT1|ANXA3|APBB1|APOC1|AQP1|ARHGAP6|ARRB1|ATF3|ATP1A2|ATP1B2|AVPR2|BCHE|BCL2A1|BDNF|BMP2|BMPR2|BMX|DST|BST1|BTK|SERPING1|C1QA|C1QC|C5AR1|C7|MYRF|CA3|CA4|CAMP|CASQ2|CAT|CAV1|CAV2|CCND2|CD33|SIGLEC6|CD34|CD36|CD68|ADGRE5|CDH5|CDH13|CDKN2B|CDO1|CD52|CFL2|CLC|CNGA4|CNN1|CNR1|CNTFR|COL4A3|COL13A1|KLF6|SL…
GO:0030334	8.90787e-13	1	86	674	regulation of cell migration	BP	2.46446e-10	94|104|186|284|306|650|659|683|728|1012|1524|1601|1602|1634|1636|1839|1901|1906|2013|2022|2159|2247|2268|2277|2294|2549|2621|2852|2920|2921|3036|3071|3084|3373|3491|3569|4223|4638|4921|5155|5168|5196|5295|5473|5581|5734|6237|6347|6369|6387|6403|6446|6910|7010|7048|7075|8434|8613|9037|9079|9314|9353|9647|9732|10395|23328|23604|28984|54538|56729|57580|64411|65009|79812|80031|83700|84913|90102|90627…	ACVRL1|ADARB1|AGTR2|ANGPT1|ANXA3|BMP2|BMPR2|BST1|C5AR1|CDH13|CX3CR1|DAB2|DACH1|DCN|ACE|HBEGF|S1PR1|EDN1|EMP2|ENG|F10|FGF2|FGR|VEGFD|FOXF1|GAB1|GAS6|GPER1|CXCL2|CXCL3|HAS1|NCKAP1L|NRG1|HYAL1|CYR61|IL6|MEOX2|MYLK|DDR2|PDGFB|ENPP2|PF4|PIK3R1|PPBP|PRKCE|PTGER4|RRAS|CCL2|CCL24|CXCL12|SELP|SGK1|TBX5|TEK|TGFBR2|TIE1|RECK|PLPP3|SEMA5A|LDB2|KLF4|SLIT2|PPM1F|DOCK4|DLC1|SASH1|DAPK2|RGCC|ROBO4|RETN|PREX1|ARA…
GO:2000145	1.18028e-12	1	90	726	regulation of cell motility	BP	3.20808e-10	94|104|186|284|306|650|659|683|728|1012|1524|1601|1602|1634|1636|1839|1901|1906|2013|2022|2159|2192|2247|2268|2277|2294|2549|2621|2852|2920|2921|3036|3071|3084|3373|3491|3569|4223|4638|4921|5155|5168|5196|5295|5473|5581|5734|6237|6347|6369|6387|6403|6446|6910|7010|7048|7075|8434|8613|9037|9079|9314|9353|9647|9732|9806|10395|23328|23604|28984|54538|56729|57580|64411|65009|79812|80031|83700|84913|8…	ACVRL1|ADARB1|AGTR2|ANGPT1|ANXA3|BMP2|BMPR2|BST1|C5AR1|CDH13|CX3CR1|DAB2|DACH1|DCN|ACE|HBEGF|S1PR1|EDN1|EMP2|ENG|F10|FBLN1|FGF2|FGR|VEGFD|FOXF1|GAB1|GAS6|GPER1|CXCL2|CXCL3|HAS1|NCKAP1L|NRG1|HYAL1|CYR61|IL6|MEOX2|MYLK|DDR2|PDGFB|ENPP2|PF4|PIK3R1|PPBP|PRKCE|PTGER4|RRAS|CCL2|CCL24|CXCL12|SELP|SGK1|TBX5|TEK|TGFBR2|TIE1|RECK|PLPP3|SEMA5A|LDB2|KLF4|SLIT2|PPM1F|DOCK4|SPOCK2|DLC1|SASH1|DAPK2|RGCC|ROBO4|R…
GO:0001775	1.21266e-12	1	135	1342	cell activation	BP	3.23927e-10	177|240|306|408|660|683|695|728|820|847|857|945|948|968|976|1178|1268|1316|1326|1490|1511|1524|1536|1675|1906|1958|1960|2040|2157|2171|2207|2215|2219|2268|2294|2352|2357|2358|2615|2621|2624|2852|3043|3071|3101|3133|3142|3553|3569|3575|3577|3579|3953|4242|4311|4332|4973|5023|5028|5155|5175|5196|5199|5295|5473|5551|5581|5588|5592|5734|5787|5806|6283|6347|6403|6404|6441|6556|6590|6622|6688|6693|6935…	AGER|ALOX5|ANXA3|ARRB1|BMX|BST1|BTK|C5AR1|CAMP|CAT|CAV1|CD33|CD36|CD68|ADGRE5|CLC|CNR1|KLF6|MAP3K8|CTGF|CTSG|CX3CR1|CYBB|CFD|EDN1|EGR1|EGR3|STOM|F8|FABP5|FCER1G|FCGR3B|FCN1|FGR|FOXF1|FOLR3|FPR1|FPR2|LRRC32|GAS6|GATA2|GPER1|HBB|NCKAP1L|HK3|HLA-E|HLX|IL1B|IL6|IL7R|CXCR1|CXCR2|LEPR|MFNG|MME|MNDA|OLR1|P2RX1|P2RY1|PDGFB|PECAM1|PF4|CFP|PIK3R1|PPBP|PRF1|PRKCE|PRKCQ|PRKG1|PTGER4|PTPRB|PTX3|S100A12|CCL2|S…
GO:0009611	1.49004e-12	1	81	638	response to wounding	BP	3.91274e-10	2|94|177|246|408|667|710|857|947|948|1361|1490|1524|1634|1839|1906|2157|2159|2160|2171|2192|2207|2247|2294|2621|2624|2627|2697|2828|3043|3084|3491|3569|4628|4638|5023|5028|5155|5196|5295|5581|5588|5592|5627|6347|6403|6442|6556|7048|7056|7099|7128|7450|7538|9002|9060|9314|10398|10630|10894|11234|22915|23533|23764|23767|30846|51090|54959|58189|79625|80274|83700|84959|89780|90102|120425|139818|14062…	A2M|ACVRL1|AGER|ALOX15|ARRB1|DST|SERPING1|CAV1|CD34|CD36|CPB2|CTGF|CX3CR1|DCN|HBEGF|EDN1|F8|F10|F11|FABP5|FBLN1|FCER1G|FGF2|FOXF1|GAS6|GATA2|GATA6|GJA1|GPR4|HBB|NRG1|CYR61|IL6|MYH10|MYLK|P2RX1|P2RY1|PDGFB|PF4|PIK3R1|PRKCE|PRKCQ|PRKG1|PROS1|CCL2|SELP|SGCA|SLC11A1|TGFBR2|THBD|TLR4|TNFAIP3|VWF|ZFP36|F2RL3|PAPSS2|KLF4|MYL9|PDPN|LYVE1|HPS5|MMRN1|PIK3R5|MAFF|FLRT3|EHD2|PLLP|ODAM|WFDC1|NDNF|SCUBE1|JAM3|…
GO:0009605	1.56884e-12	1	186	2079	response to external stimulus	BP	4.051e-10	2|32|104|153|154|177|185|284|306|358|408|467|477|590|627|659|683|695|710|728|729|730|732|820|847|857|947|948|1012|1030|1268|1361|1440|1511|1524|1536|1634|1808|1839|1901|1906|1910|1959|1960|2022|2115|2160|2167|2207|2247|2268|2277|2294|2353|2354|2357|2358|2549|2621|2674|2697|2852|2920|2921|3055|3071|3084|3133|3164|3373|3491|3553|3569|3577|3579|3727|3730|3949|4023|4129|4360|4628|5028|5138|5155|5166|…	A2M|ACACB|ADARB1|ADRB1|ADRB2|AGER|AGTR1|ANGPT1|ANXA3|AQP1|ARRB1|ATF3|ATP1A2|BCHE|BDNF|BMPR2|BST1|BTK|SERPING1|C5AR1|C6|C7|C8B|CAMP|CAT|CAV1|CD34|CD36|CDH13|CDKN2B|CNR1|CPB2|CSF3|CTSG|CX3CR1|CYBB|DCN|DPYSL2|HBEGF|S1PR1|EDN1|EDNRB|EGR2|EGR3|ENG|ETV1|F11|FABP4|FCER1G|FGF2|FGR|VEGFD|FOXF1|FOS|FOSB|FPR1|FPR2|GAB1|GAS6|GFRA1|GJA1|GPER1|CXCL2|CXCL3|HCK|NCKAP1L|NRG1|HLA-E|NR4A1|HYAL1|CYR61|IL1B|IL6|CXCR1…
GO:0051179	1.81147e-12	1	447	6138	localization	BP	4.60084e-10	2|21|32|94|104|154|177|185|186|240|246|284|306|322|341|358|361|366|408|477|482|554|627|650|659|667|683|695|710|728|761|762|820|845|847|857|858|945|947|948|968|976|1012|1036|1262|1268|1318|1346|1361|1410|1440|1490|1511|1524|1536|1601|1602|1634|1636|1675|1808|1839|1901|1906|1910|1959|1960|2013|2022|2040|2078|2157|2159|2167|2171|2192|2207|2214|2215|2219|2247|2264|2268|2273|2277|2294|2352|2357|2358|2…	A2M|ABCA3|ACACB|ACVRL1|ADARB1|ADRB2|AGER|AGTR1|AGTR2|ALOX5|ALOX15|ANGPT1|ANXA3|APBB1|APOC1|AQP1|AQP4|AQP9|ARRB1|ATP1A2|ATP1B2|AVPR2|BDNF|BMP2|BMPR2|DST|BST1|BTK|SERPING1|C5AR1|CA3|CA4|CAMP|CASQ2|CAT|CAV1|CAV2|CD33|CD34|CD36|CD68|ADGRE5|CDH13|CDO1|CNGA4|CNR1|SLC31A2|COX7A1|CPB2|CRYAB|CSF3|CTGF|CTSG|CX3CR1|CYBB|DAB2|DACH1|DCN|ACE|CFD|DPYSL2|HBEGF|S1PR1|EDN1|EDNRB|EGR2|EGR3|EMP2|ENG|STOM|ERG|F8|F10|…
GO:0032879	2.03047e-12	1	218	2470	regulation of localization	BP	5.07388e-10	32|94|104|154|185|186|246|284|306|322|341|358|408|477|482|554|627|650|659|683|728|845|857|947|948|1012|1268|1318|1361|1410|1440|1524|1536|1601|1602|1634|1636|1839|1901|1906|1910|2013|2022|2040|2159|2192|2207|2219|2247|2268|2273|2277|2294|2549|2615|2621|2624|2697|2702|2719|2824|2852|2920|2921|3036|3055|3071|3084|3133|3373|3491|3553|3569|3762|3772|4023|4129|4223|4481|4638|4881|4921|5023|5028|5138|5…	ACACB|ACVRL1|ADARB1|ADRB2|AGTR1|AGTR2|ALOX15|ANGPT1|ANXA3|APBB1|APOC1|AQP1|ARRB1|ATP1A2|ATP1B2|AVPR2|BDNF|BMP2|BMPR2|BST1|C5AR1|CASQ2|CAV1|CD34|CD36|CDH13|CNR1|SLC31A2|CPB2|CRYAB|CSF3|CX3CR1|CYBB|DAB2|DACH1|DCN|ACE|HBEGF|S1PR1|EDN1|EDNRB|EMP2|ENG|STOM|F10|FBLN1|FCER1G|FCN1|FGF2|FGR|FHL1|VEGFD|FOXF1|GAB1|LRRC32|GAS6|GATA2|GJA1|GJA5|GPC3|GPM6B|GPER1|CXCL2|CXCL3|HAS1|HCK|NCKAP1L|NRG1|HLA-E|HYAL1|CYR…
GO:0008015	2.0826e-12	1	69	496	blood circulation	BP	5.12153e-10	94|153|154|185|186|284|477|482|554|659|710|845|857|947|1268|1285|1359|1490|1511|1636|1674|1827|1839|1906|1910|2013|2034|2313|2621|2697|2702|2852|3043|3762|3777|4223|4311|4881|4883|4973|5023|5028|5138|5155|5348|5468|5592|5800|6323|6330|6387|6445|6446|6505|6532|6909|7010|7134|7136|8654|8862|9254|9353|9732|10266|10659|23493|27129|53826	ACVRL1|ADRB1|ADRB2|AGTR1|AGTR2|ANGPT1|ATP1A2|ATP1B2|AVPR2|BMPR2|SERPING1|CASQ2|CAV1|CD34|CNR1|COL4A3|CPA3|CTGF|CTSG|ACE|DES|RCAN1|HBEGF|EDN1|EDNRB|EMP2|EPAS1|FLI1|GAS6|GJA1|GJA5|GPER1|HBB|KCNJ5|KCNK3|MEOX2|MME|NPR1|NPR3|OLR1|P2RX1|P2RY1|PDE2A|PDGFB|FXYD1|PPARG|PRKG1|PTPRO|SCN1A|SCN4B|CXCL12|SGCG|SGK1|SLC1A1|SLC6A4|TBX2|TEK|TNNC1|TNNI2|PDE5A|APLN|CACNA2D2|SLIT2|DOCK4|RAMP2|CELF2|HEY2|HSPB7|FXYD6
GO:0051241	2.27474e-12	1	110	999	negative regulation of multicellular organismal process	BP	5.50664e-10	94|153|154|177|186|284|341|408|477|554|650|659|695|710|714|947|1285|1361|1634|1906|1910|2160|2202|2247|2615|2621|2624|2627|2662|2697|2702|2828|3071|3084|3142|3202|3400|3553|3569|4091|4211|4223|4881|4974|5155|5196|5295|5376|5468|5592|5627|5734|5800|5950|6092|6347|6425|6441|6532|6556|6909|6910|7010|7048|7056|7075|7099|7128|7356|7538|7704|8654|8862|8994|9037|9173|9308|9314|9353|9732|10203|10365|1102…	ACVRL1|ADRB1|ADRB2|AGER|AGTR2|ANGPT1|APOC1|ARRB1|ATP1A2|AVPR2|BMP2|BMPR2|BTK|SERPING1|C1QC|CD34|COL4A3|CPB2|DCN|EDN1|EDNRB|F11|EFEMP1|FGF2|LRRC32|GAS6|GATA2|GATA6|GDF10|GJA1|GJA5|GPR4|NCKAP1L|NRG1|HLX|HOXA5|ID4|IL1B|IL6|SMAD6|MEIS1|MEOX2|NPR1|OMG|PDGFB|PF4|PIK3R1|PMP22|PPARG|PRKG1|PROS1|PTGER4|PTPRO|RBP4|ROBO2|CCL2|SFRP5|SFTPD|SLC6A4|SLC11A1|TBX2|TBX5|TEK|TGFBR2|THBD|TIE1|TLR4|TNFAIP3|SCGB1A1|ZFP…
GO:0032940	2.36407e-12	1	139	1391	secretion by cell	BP	5.57085e-10	2|185|186|240|284|306|322|408|683|695|710|728|820|847|945|947|948|968|976|1268|1361|1490|1511|1536|1675|1906|2022|2040|2157|2171|2207|2215|2219|2268|2277|2294|2352|2357|2358|2615|2621|2624|2697|2702|2852|3043|3055|3071|3101|3133|3553|3569|3577|3579|4023|4129|4311|4332|4628|4915|4973|5023|5028|5155|5175|5196|5199|5319|5473|5581|5627|5734|5787|5806|5950|6283|6387|6403|6414|6505|6532|6556|6590|6622|…	A2M|AGTR1|AGTR2|ALOX5|ANGPT1|ANXA3|APBB1|ARRB1|BST1|BTK|SERPING1|C5AR1|CAMP|CAT|CD33|CD34|CD36|CD68|ADGRE5|CNR1|CPB2|CTGF|CTSG|CYBB|CFD|EDN1|ENG|STOM|F8|FABP5|FCER1G|FCGR3B|FCN1|FGR|VEGFD|FOXF1|FOLR3|FPR1|FPR2|LRRC32|GAS6|GATA2|GJA1|GJA5|GPER1|HBB|HCK|NCKAP1L|HK3|HLA-E|IL1B|IL6|CXCR1|CXCR2|LPL|MAOB|MME|MNDA|MYH10|NTRK2|OLR1|P2RX1|P2RY1|PDGFB|PECAM1|PF4|CFP|PLA2G1B|PPBP|PRKCE|PROS1|PTGER4|PTPRB|PT…
GO:0022603	2.37318e-12	1	107	933	regulation of anatomical structure morphogenesis	BP	5.57085e-10	94|186|306|358|627|650|659|728|729|947|948|1285|1361|1524|1536|1601|1634|1808|1906|2013|2022|2078|2192|2247|2263|2268|2277|2624|2627|2719|2828|3055|3084|3202|3373|3553|3569|4223|4628|4881|4915|4919|4974|5168|5196|5740|5789|5800|6092|6237|6347|6369|6383|6387|6425|6909|6910|7010|7048|7075|7128|7940|8322|8742|8994|9037|9314|9353|9839|9912|10266|10395|10630|10810|23237|23328|23493|23554|28984|30846|5…	ACVRL1|AGTR2|ANXA3|AQP1|BDNF|BMP2|BMPR2|C5AR1|C6|CD34|CD36|COL4A3|CPB2|CX3CR1|CYBB|DAB2|DCN|DPYSL2|EDN1|EMP2|ENG|ERG|FBLN1|FGF2|FGFR2|FGR|VEGFD|GATA2|GATA6|GPC3|GPR4|HCK|NRG1|HOXA5|HYAL1|IL1B|IL6|MEOX2|MYH10|NPR1|NTRK2|ROR1|OMG|ENPP2|PF4|PTGIS|PTPRD|PTPRO|ROBO2|RRAS|CCL2|CCL24|SDC2|CXCL12|SFRP5|TBX2|TBX5|TEK|TGFBR2|TIE1|TNFAIP3|LST1|FZD4|TNFSF12|LIMD1|SEMA5A|KLF4|SLIT2|ZEB2|ARHGAP44|RAMP2|DLC1|PD…
GO:0071310	3.21147e-12	1	199	2238	cellular response to organic substance	BP	7.42616e-10	94|177|181|185|186|246|284|358|361|366|408|467|477|554|650|659|687|695|845|847|857|858|948|968|1003|1012|1030|1271|1361|1440|1490|1511|1524|1536|1601|1634|1843|1906|1910|1958|1959|1960|2022|2167|2207|2247|2263|2264|2294|2353|2354|2532|2549|2621|2627|2662|2690|2719|2791|2819|2852|2920|2921|3036|3055|3133|3164|3340|3373|3491|3553|3563|3568|3569|3575|3577|3579|3727|3730|3949|3953|3977|4005|4023|4091…	ACVRL1|AGER|AGRP|AGTR1|AGTR2|ALOX15|ANGPT1|AQP1|AQP4|AQP9|ARRB1|ATF3|ATP1A2|AVPR2|BMP2|BMPR2|KLF9|BTK|CASQ2|CAT|CAV1|CAV2|CD36|CD68|CDH5|CDH13|CDKN2B|CNTFR|CPB2|CSF3|CTGF|CTSG|CX3CR1|CYBB|DAB2|DCN|DUSP1|EDN1|EDNRB|EGR1|EGR2|EGR3|ENG|FABP4|FCER1G|FGF2|FGFR2|FGFR4|FOXF1|FOS|FOSB|ACKR1|GAB1|GAS6|GATA6|GDF10|GHR|GPC3|GNG11|GPD1|GPER1|CXCL2|CXCL3|HAS1|HCK|HLA-E|NR4A1|NDST1|HYAL1|CYR61|IL1B|IL3RA|IL5RA…
GO:0030029	3.4768e-12	1	85	664	actin filament-based process	BP	7.92147e-10	246|358|395|408|477|683|845|857|1073|1264|1440|1490|1674|1901|1906|2013|2037|2697|2702|2824|3055|3071|3762|4628|4629|4739|5295|5319|5581|5592|5734|6323|6330|6369|6387|6401|6711|7010|7111|7134|7136|7148|9037|9353|9535|9647|9912|10129|10174|10391|10395|10529|10580|10810|11013|11346|22808|22885|22899|22998|25802|27063|28984|30846|54959|57381|57477|57580|58529|80122|83700|85358|85458|90102|91663|9366…	ALOX15|AQP1|ARHGAP6|ARRB1|ATP1A2|BST1|CASQ2|CAV1|CFL2|CNN1|CSF3|CTGF|DES|S1PR1|EDN1|EMP2|EPB41L2|GJA1|GJA5|GPM6B|HCK|NCKAP1L|KCNJ5|MYH10|MYH11|NEDD9|PIK3R1|PLA2G1B|PRKCE|PRKG1|PTGER4|SCN1A|SCN4B|CCL24|CXCL12|SELE|SPTBN1|TEK|TMOD1|TNNC1|TNNI2|TNXB|SEMA5A|SLIT2|GMFG|PPM1F|ARHGAP44|FRY|SORBS3|CORO2B|DLC1|NEBL|SORBS1|WASF3|TMSB15A|SYNPO|MRAS|ABLIM3|ARHGEF15|LIMCH1|LMOD1|ANKRD1|RGCC|EHD2|ODAM|RHOJ|SHR…
GO:0006955	5.43581e-12	1	175	1995	immune response	BP	1.22054e-09	2|104|177|240|246|284|306|361|366|660|683|695|710|712|713|714|728|729|730|732|820|847|857|945|947|948|968|976|1178|1268|1440|1511|1536|1675|1906|1958|2013|2015|2040|2171|2206|2207|2214|2215|2219|2268|2294|2352|2353|2357|2358|2621|2624|2852|2920|2921|3043|3055|3071|3101|3133|3142|3384|3553|3568|3569|3575|3577|3579|4091|4242|4311|4332|4360|4688|4973|5023|5168|5175|5196|5199|5295|5319|5320|5468|5473…	A2M|ADARB1|AGER|ALOX5|ALOX15|ANGPT1|ANXA3|AQP4|AQP9|BMX|BST1|BTK|SERPING1|C1QA|C1QB|C1QC|C5AR1|C6|C7|C8B|CAMP|CAT|CAV1|CD33|CD34|CD36|CD68|ADGRE5|CLC|CNR1|CSF3|CTSG|CYBB|CFD|EDN1|EGR1|EMP2|ADGRE1|STOM|FABP5|MS4A2|FCER1G|FCGR3A|FCGR3B|FCN1|FGR|FOXF1|FOLR3|FOS|FPR1|FPR2|GAS6|GATA2|GPER1|CXCL2|CXCL3|HBB|HCK|NCKAP1L|HK3|HLA-E|HLX|ICAM2|IL1B|IL5RA|IL6|IL7R|CXCR1|CXCR2|SMAD6|MFNG|MME|MNDA|MRC1|NCF2|OLR…
GO:0051716	6.01349e-12	1	483	6917	cellular response to stimulus	BP	1.33096e-09	2|94|153|154|177|181|185|186|187|241|246|284|322|358|361|366|395|408|467|477|554|627|650|659|660|667|683|687|695|728|845|847|857|858|894|945|947|948|968|976|1003|1012|1030|1268|1271|1285|1326|1361|1410|1440|1490|1511|1524|1536|1572|1601|1634|1808|1827|1839|1843|1850|1901|1906|1910|1958|1959|1960|2013|2015|2022|2034|2040|2078|2159|2167|2192|2202|2203|2206|2207|2214|2219|2247|2263|2264|2268|2277|22…	A2M|ACVRL1|ADRB1|ADRB2|AGER|AGRP|AGTR1|AGTR2|APLNR|ALOX5AP|ALOX15|ANGPT1|APBB1|AQP1|AQP4|AQP9|ARHGAP6|ARRB1|ATF3|ATP1A2|AVPR2|BDNF|BMP2|BMPR2|BMX|DST|BST1|KLF9|BTK|C5AR1|CASQ2|CAT|CAV1|CAV2|CCND2|CD33|CD34|CD36|CD68|ADGRE5|CDH5|CDH13|CDKN2B|CNR1|CNTFR|COL4A3|MAP3K8|CPB2|CRYAB|CSF3|CTGF|CTSG|CX3CR1|CYBB|CYP2F1|DAB2|DCN|DPYSL2|RCAN1|HBEGF|DUSP1|DUSP8|S1PR1|EDN1|EDNRB|EGR1|EGR2|EGR3|EMP2|ADGRE1|ENG|…
GO:0060326	6.74596e-12	1	42	250	cell chemotaxis	BP	1.47204e-09	185|683|728|1839|1901|1906|1910|1960|2207|2247|2277|2357|2358|2621|2920|2921|3071|3164|3553|3569|3577|3579|5155|5196|5319|5473|5588|5800|6283|6347|6358|6368|6369|6387|6441|9037|9353|9732|23604|57580|83700|120425	AGTR1|BST1|C5AR1|HBEGF|S1PR1|EDN1|EDNRB|EGR3|FCER1G|FGF2|VEGFD|FPR1|FPR2|GAS6|CXCL2|CXCL3|NCKAP1L|NR4A1|IL1B|IL6|CXCR1|CXCR2|PDGFB|PF4|PLA2G1B|PPBP|PRKCQ|PTPRO|S100A12|CCL2|CCL14|CCL23|CCL24|CXCL12|SFTPD|SEMA5A|SLIT2|DOCK4|DAPK2|PREX1|JAM3|JAML
GO:0042060	9.11137e-12	1	70	532	wound healing	BP	1.96059e-09	2|94|177|246|408|710|857|947|948|1361|1634|1839|1906|2157|2159|2160|2192|2207|2247|2621|2624|2627|2697|2828|3043|3084|3491|3569|4628|4638|5023|5028|5155|5196|5295|5581|5588|5592|5627|6347|6403|6442|6556|7048|7056|7099|7128|7450|9002|9060|10398|10630|11234|22915|23533|23764|30846|54959|58189|79625|80274|84959|89780|90102|120425|139818|140628|140706|286133|653145	A2M|ACVRL1|AGER|ALOX15|ARRB1|SERPING1|CAV1|CD34|CD36|CPB2|DCN|HBEGF|EDN1|F8|F10|F11|FBLN1|FCER1G|FGF2|GAS6|GATA2|GATA6|GJA1|GPR4|HBB|NRG1|CYR61|IL6|MYH10|MYLK|P2RX1|P2RY1|PDGFB|PF4|PIK3R1|PRKCE|PRKCQ|PRKG1|PROS1|CCL2|SELP|SGCA|SLC11A1|TGFBR2|THBD|TLR4|TNFAIP3|VWF|F2RL3|PAPSS2|MYL9|PDPN|HPS5|MMRN1|PIK3R5|MAFF|EHD2|ODAM|WFDC1|NDNF|SCUBE1|UBASH3B|WNT3A|PHLDB2|JAML|DOCK11|GATA5|CCM2L|SCARA5|ANXA8
GO:0019220	1.11749e-11	1	154	1619	regulation of phosphate metabolic process	BP	2.34747e-09	94|104|153|154|177|186|246|284|341|408|467|554|650|659|683|728|857|858|894|948|1030|1326|1440|1490|1601|1634|1636|1839|1843|1850|1906|1910|2013|2022|2167|2192|2203|2247|2263|2264|2268|2357|2549|2621|2662|2690|2819|2852|2977|3071|3084|3491|3553|3569|3949|4091|4616|4881|4883|4915|4921|5028|5138|5155|5168|5196|5295|5319|5320|5322|5334|5581|5739|5745|6237|6283|6347|6358|6368|6369|6556|6622|6693|7010|…	ACVRL1|ADARB1|ADRB1|ADRB2|AGER|AGTR2|ALOX15|ANGPT1|APOC1|ARRB1|ATF3|AVPR2|BMP2|BMPR2|BST1|C5AR1|CAV1|CAV2|CCND2|CD36|CDKN2B|MAP3K8|CSF3|CTGF|DAB2|DCN|ACE|HBEGF|DUSP1|DUSP8|EDN1|EDNRB|EMP2|ENG|FABP4|FBLN1|FBP1|FGF2|FGFR2|FGFR4|FGR|FPR1|GAB1|GAS6|GDF10|GHR|GPD1|GPER1|GUCY1A2|NCKAP1L|NRG1|CYR61|IL1B|IL6|LDLR|SMAD6|GADD45B|NPR1|NPR3|NTRK2|DDR2|P2RY1|PDE2A|PDGFB|ENPP2|PF4|PIK3R1|PLA2G1B|PLA2G2A|PLA2G5…
GO:0051174	1.12123e-11	1	155	1632	regulation of phosphorus metabolic process	BP	2.34747e-09	94|104|153|154|177|186|246|284|341|408|467|554|650|659|683|728|857|858|894|948|1030|1326|1440|1490|1601|1634|1636|1839|1843|1850|1906|1910|2013|2022|2167|2192|2203|2247|2263|2264|2268|2357|2549|2621|2662|2690|2819|2852|2977|3071|3084|3491|3553|3569|3949|4091|4616|4881|4883|4915|4921|5028|5138|5155|5166|5168|5196|5295|5319|5320|5322|5334|5581|5739|5745|6237|6283|6347|6358|6368|6369|6556|6622|6693|…	ACVRL1|ADARB1|ADRB1|ADRB2|AGER|AGTR2|ALOX15|ANGPT1|APOC1|ARRB1|ATF3|AVPR2|BMP2|BMPR2|BST1|C5AR1|CAV1|CAV2|CCND2|CD36|CDKN2B|MAP3K8|CSF3|CTGF|DAB2|DCN|ACE|HBEGF|DUSP1|DUSP8|EDN1|EDNRB|EMP2|ENG|FABP4|FBLN1|FBP1|FGF2|FGFR2|FGFR4|FGR|FPR1|GAB1|GAS6|GDF10|GHR|GPD1|GPER1|GUCY1A2|NCKAP1L|NRG1|CYR61|IL1B|IL6|LDLR|SMAD6|GADD45B|NPR1|NPR3|NTRK2|DDR2|P2RY1|PDE2A|PDGFB|PDK4|ENPP2|PF4|PIK3R1|PLA2G1B|PLA2G2A|P…
GO:0002274	1.37696e-11	1	75	611	myeloid leukocyte activation	BP	2.84443e-09	240|306|683|695|728|820|847|945|948|968|976|1268|1511|1524|1536|1675|2040|2171|2207|2215|2219|2268|2294|2352|2357|2358|2624|3043|3071|3101|3577|3579|4311|4332|4973|5023|5175|5199|5473|5581|5787|5806|6283|6556|6590|6622|6688|7048|7099|7305|8013|9173|9535|10326|11025|22918|25840|50487|51311|51744|56729|57580|80301|81501|84106|84658|90865|126014|140885|146722|150372|160364|199675|353189|100049587	ALOX5|ANXA3|BST1|BTK|C5AR1|CAMP|CAT|CD33|CD36|CD68|ADGRE5|CNR1|CTSG|CX3CR1|CYBB|CFD|STOM|FABP5|FCER1G|FCGR3B|FCN1|FGR|FOXF1|FOLR3|FPR1|FPR2|GATA2|HBB|NCKAP1L|HK3|CXCR1|CXCR2|MME|MNDA|OLR1|P2RX1|PECAM1|CFP|PPBP|PRKCE|PTPRB|PTX3|S100A12|SLC11A1|SLPI|SNCA|SPI1|TGFBR2|TLR4|TYROBP|NR4A3|IL1RL1|GMFG|SIRPB1|LILRB3|CD93|METTL7A|PLA2G3|TLR8|CD244|RETN|PREX1|PLEKHO2|DCSTAMP|PRAM1|ADGRE3|IL33|OSCAR|SIRPA|CD…
GO:0061061	1.54166e-11	1	75	576	muscle structure development	BP	3.14275e-09	104|186|467|627|650|845|857|858|1073|1271|1634|1839|1901|1906|1910|1958|1959|1960|2022|2034|2115|2247|2263|2273|2294|2353|2627|2697|2852|3084|3142|3569|4223|4628|4629|4638|5155|5950|6442|6445|6909|6910|6926|6935|6943|7048|7049|7111|7134|7402|7832|7881|8516|9254|9444|10266|10529|22808|23345|23493|23764|27063|30846|57158|57493|58529|64321|79652|85407|89780|91624|140706|144165|255743|341676	ADARB1|AGTR2|ATF3|BDNF|BMP2|CASQ2|CAV1|CAV2|CFL2|CNTFR|DCN|HBEGF|S1PR1|EDN1|EDNRB|EGR1|EGR2|EGR3|ENG|EPAS1|ETV1|FGF2|FGFR2|FHL1|FOXF1|FOS|GATA6|GJA1|GPER1|NRG1|HLX|IL6|MEOX2|MYH10|MYH11|MYLK|PDGFB|RBP4|SGCA|SGCG|TBX2|TBX5|TBX3|ZEB1|TCF21|TGFBR2|TGFBR3|TMOD1|TNNC1|UTRN|BTG2|KCNAB1|ITGA8|CACNA2D2|QKI|RAMP2|NEBL|MRAS|SYNE1|HEY2|MAFF|ANKRD1|EHD2|JPH2|HEG1|MYOZ1|SOX17|TMEM204|NKD1|WNT3A|NEXN|CCM2L|PRI…
GO:0010033	1.60491e-11	1	236	2849	response to organic substance	BP	3.22921e-09	21|32|94|177|181|185|186|246|284|306|358|361|366|408|467|477|554|590|650|659|687|695|728|761|845|847|857|858|948|968|1003|1012|1030|1036|1268|1271|1361|1410|1440|1490|1511|1524|1536|1601|1634|1843|1906|1910|1958|1959|1960|2022|2167|2207|2247|2263|2264|2294|2353|2354|2532|2549|2621|2624|2627|2662|2690|2697|2719|2791|2819|2852|2878|2920|2921|3036|3055|3133|3164|3316|3340|3373|3491|3553|3563|3568|35…	ABCA3|ACACB|ACVRL1|AGER|AGRP|AGTR1|AGTR2|ALOX15|ANGPT1|ANXA3|AQP1|AQP4|AQP9|ARRB1|ATF3|ATP1A2|AVPR2|BCHE|BMP2|BMPR2|KLF9|BTK|C5AR1|CA3|CASQ2|CAT|CAV1|CAV2|CD36|CD68|CDH5|CDH13|CDKN2B|CDO1|CNR1|CNTFR|CPB2|CRYAB|CSF3|CTGF|CTSG|CX3CR1|CYBB|DAB2|DCN|DUSP1|EDN1|EDNRB|EGR1|EGR2|EGR3|ENG|FABP4|FCER1G|FGF2|FGFR2|FGFR4|FOXF1|FOS|FOSB|ACKR1|GAB1|GAS6|GATA2|GATA6|GDF10|GHR|GJA1|GPC3|GNG11|GPD1|GPER1|GPX3|CX…
GO:0050727	1.85309e-11	1	46	285	regulation of inflammatory response	BP	3.68075e-09	2|177|185|683|695|710|728|729|730|732|1268|1524|1910|2167|2207|2294|2852|3055|3553|3569|3949|4023|5138|5199|5320|5468|5627|5734|5740|6283|6369|6401|6693|7010|7099|7128|7356|9021|9173|9314|10203|58189|90527|90865|255877|338557	A2M|AGER|AGTR1|BST1|BTK|SERPING1|C5AR1|C6|C7|C8B|CNR1|CX3CR1|EDNRB|FABP4|FCER1G|FOXF1|GPER1|HCK|IL1B|IL6|LDLR|LPL|PDE2A|CFP|PLA2G2A|PPARG|PROS1|PTGER4|PTGIS|S100A12|CCL24|SELE|SPN|TEK|TLR4|TNFAIP3|SCGB1A1|SOCS3|IL1RL1|KLF4|CALCRL|WFDC1|DUOXA1|IL33|BCL6B|FFAR4
GO:0003158	2.33852e-11	1	28	111	endothelium development	BP	4.58617e-09	94|659|947|1003|1901|2022|2697|2701|2702|3084|3553|4855|5138|5175|6935|7122|23493|26084|54345|55273|57493|64321|80274|81575|84913|90627|91663|168667	ACVRL1|BMPR2|CD34|CDH5|S1PR1|ENG|GJA1|GJA4|GJA5|NRG1|IL1B|NOTCH4|PDE2A|PECAM1|ZEB1|CLDN5|HEY2|ARHGEF26|SOX18|TMEM100|HEG1|SOX17|SCUBE1|APOLD1|ATOH8|STARD13|MYADM|BMPER
GO:0051094	3.47746e-11	1	122	1173	positive regulation of developmental process	BP	6.73454e-09	32|94|154|177|185|186|306|322|358|627|650|659|695|728|729|745|947|948|1003|1268|1440|1490|1524|1536|1601|1634|1906|1958|1960|2022|2247|2263|2277|2353|2621|2624|2627|2690|2824|2852|3071|3084|3142|3202|3373|3400|3491|3553|3569|3575|3727|4023|4481|4915|4921|5155|5168|5196|5320|5468|5740|5789|6092|6237|6369|6387|6886|6909|6910|6925|6935|7010|7048|7049|7122|7128|7538|7704|8654|8742|9021|9037|9254|9308…	ACACB|ACVRL1|ADRB2|AGER|AGTR1|AGTR2|ANXA3|APBB1|AQP1|BDNF|BMP2|BMPR2|BTK|C5AR1|C6|MYRF|CD34|CD36|CDH5|CNR1|CSF3|CTGF|CX3CR1|CYBB|DAB2|DCN|EDN1|EGR1|EGR3|ENG|FGF2|FGFR2|VEGFD|FOS|GAS6|GATA2|GATA6|GHR|GPM6B|GPER1|NCKAP1L|NRG1|HLX|HOXA5|HYAL1|ID4|CYR61|IL1B|IL6|IL7R|JUND|LPL|MSR1|NTRK2|DDR2|PDGFB|ENPP2|PF4|PLA2G2A|PPARG|PTGIS|PTPRD|ROBO2|RRAS|CCL24|CXCL12|TAL1|TBX2|TBX5|TCF4|ZEB1|TEK|TGFBR2|TGFBR3|C…
GO:0030593	3.93904e-11	1	22	88	neutrophil chemotaxis	BP	7.53426e-09	683|728|1906|2207|2920|2921|3071|3553|3579|5196|5319|5473|6283|6347|6358|6368|6369|9353|23604|57580|83700|120425	BST1|C5AR1|EDN1|FCER1G|CXCL2|CXCL3|NCKAP1L|IL1B|CXCR2|PF4|PLA2G1B|PPBP|S100A12|CCL2|CCL14|CCL23|CCL24|SLIT2|DAPK2|PREX1|JAM3|JAML
GO:0032103	4.43749e-11	1	42	261	positive regulation of response to external stimulus	BP	8.38416e-09	177|185|659|695|728|1012|1268|1361|1901|1906|2167|2207|2247|2277|2621|2920|2921|3071|3553|3569|3949|4023|5138|5155|5196|5320|5473|5734|6283|6347|6369|6387|7056|7099|9037|9173|9353|9450|9647|23328|23604|90865	AGER|AGTR1|BMPR2|BTK|C5AR1|CDH13|CNR1|CPB2|S1PR1|EDN1|FABP4|FCER1G|FGF2|VEGFD|GAS6|CXCL2|CXCL3|NCKAP1L|IL1B|IL6|LDLR|LPL|PDE2A|PDGFB|PF4|PLA2G2A|PPBP|PTGER4|S100A12|CCL2|CCL24|CXCL12|THBD|TLR4|SEMA5A|IL1RL1|SLIT2|LY86|PPM1F|SASH1|DAPK2|IL33
GO:0044765	4.85107e-11	1	250	3085	single-organism transport	BP	9.05514e-09	2|21|32|185|186|240|246|284|306|322|341|358|361|366|408|477|482|554|667|683|695|710|728|820|845|847|857|945|947|948|968|976|1036|1262|1268|1346|1361|1440|1490|1511|1536|1601|1636|1675|1906|1910|2022|2040|2157|2171|2207|2214|2215|2219|2247|2268|2273|2277|2294|2352|2357|2358|2615|2621|2624|2697|2702|2719|2824|2852|2890|3039|3040|3043|3055|3071|3084|3101|3133|3553|3569|3577|3579|3762|3772|3777|3949|…	A2M|ABCA3|ACACB|AGTR1|AGTR2|ALOX5|ALOX15|ANGPT1|ANXA3|APBB1|APOC1|AQP1|AQP4|AQP9|ARRB1|ATP1A2|ATP1B2|AVPR2|DST|BST1|BTK|SERPING1|C5AR1|CAMP|CASQ2|CAT|CAV1|CD33|CD34|CD36|CD68|ADGRE5|CDO1|CNGA4|CNR1|COX7A1|CPB2|CSF3|CTGF|CTSG|CYBB|DAB2|ACE|CFD|EDN1|EDNRB|ENG|STOM|F8|FABP5|FCER1G|FCGR3A|FCGR3B|FCN1|FGF2|FGR|FHL1|VEGFD|FOXF1|FOLR3|FPR1|FPR2|LRRC32|GAS6|GATA2|GJA1|GJA5|GPC3|GPM6B|GPER1|GRIA1|HBA1|HBA…
GO:0042325	5.11542e-11	1	135	1383	regulation of phosphorylation	BP	9.4349e-09	94|104|154|177|246|284|408|467|650|659|683|728|857|858|894|948|1030|1326|1440|1490|1601|1634|1636|1839|1843|1850|1906|1910|2013|2022|2167|2192|2203|2247|2263|2264|2268|2357|2549|2621|2662|2690|2819|2852|3071|3084|3491|3553|3569|4091|4616|4915|4921|5028|5155|5168|5295|5319|5320|5322|5334|5581|6237|6283|6347|6358|6368|6369|6556|6622|6693|7010|7044|7048|7078|7099|7128|8322|8613|8654|8835|8850|8862|9…	ACVRL1|ADARB1|ADRB2|AGER|ALOX15|ANGPT1|ARRB1|ATF3|BMP2|BMPR2|BST1|C5AR1|CAV1|CAV2|CCND2|CD36|CDKN2B|MAP3K8|CSF3|CTGF|DAB2|DCN|ACE|HBEGF|DUSP1|DUSP8|EDN1|EDNRB|EMP2|ENG|FABP4|FBLN1|FBP1|FGF2|FGFR2|FGFR4|FGR|FPR1|GAB1|GAS6|GDF10|GHR|GPD1|GPER1|NCKAP1L|NRG1|CYR61|IL1B|IL6|SMAD6|GADD45B|NTRK2|DDR2|P2RY1|PDGFB|ENPP2|PIK3R1|PLA2G1B|PLA2G2A|PLA2G5|PLCL1|PRKCE|RRAS|S100A12|CCL2|CCL14|CCL23|CCL24|SLC11A1|…
GO:0010562	5.38675e-11	1	109	1049	positive regulation of phosphorus metabolic process	BP	9.70429e-09	94|153|154|177|186|246|284|408|554|650|659|728|857|858|894|948|1326|1440|1490|1601|1636|1839|1906|1910|2013|2022|2247|2263|2264|2268|2357|2549|2621|2662|2690|2819|2852|2977|3071|3084|3491|3553|3569|4616|4881|4915|4921|5028|5155|5168|5196|5319|5320|5322|5581|5739|5745|6283|6347|6358|6368|6369|6556|6622|6693|7010|7044|7048|7099|7466|8322|8613|8654|8862|9021|9365|9770|9839|10174|10203|10266|10395|23…	ACVRL1|ADRB1|ADRB2|AGER|AGTR2|ALOX15|ANGPT1|ARRB1|AVPR2|BMP2|BMPR2|C5AR1|CAV1|CAV2|CCND2|CD36|MAP3K8|CSF3|CTGF|DAB2|ACE|HBEGF|EDN1|EDNRB|EMP2|ENG|FGF2|FGFR2|FGFR4|FGR|FPR1|GAB1|GAS6|GDF10|GHR|GPD1|GPER1|GUCY1A2|NCKAP1L|NRG1|CYR61|IL1B|IL6|GADD45B|NPR1|NTRK2|DDR2|P2RY1|PDGFB|ENPP2|PF4|PLA2G1B|PLA2G2A|PLA2G5|PRKCE|PTGIR|PTH1R|S100A12|CCL2|CCL14|CCL23|CCL24|SLC11A1|SNCA|SPN|TEK|LEFTY2|TGFBR2|TLR4|WF…
GO:0045937	5.38675e-11	1	109	1049	positive regulation of phosphate metabolic process	BP	9.70429e-09	94|153|154|177|186|246|284|408|554|650|659|728|857|858|894|948|1326|1440|1490|1601|1636|1839|1906|1910|2013|2022|2247|2263|2264|2268|2357|2549|2621|2662|2690|2819|2852|2977|3071|3084|3491|3553|3569|4616|4881|4915|4921|5028|5155|5168|5196|5319|5320|5322|5581|5739|5745|6283|6347|6358|6368|6369|6556|6622|6693|7010|7044|7048|7099|7466|8322|8613|8654|8862|9021|9365|9770|9839|10174|10203|10266|10395|23…	ACVRL1|ADRB1|ADRB2|AGER|AGTR2|ALOX15|ANGPT1|ARRB1|AVPR2|BMP2|BMPR2|C5AR1|CAV1|CAV2|CCND2|CD36|MAP3K8|CSF3|CTGF|DAB2|ACE|HBEGF|EDN1|EDNRB|EMP2|ENG|FGF2|FGFR2|FGFR4|FGR|FPR1|GAB1|GAS6|GDF10|GHR|GPD1|GPER1|GUCY1A2|NCKAP1L|NRG1|CYR61|IL1B|IL6|GADD45B|NPR1|NTRK2|DDR2|P2RY1|PDGFB|ENPP2|PF4|PLA2G1B|PLA2G2A|PLA2G5|PRKCE|PTGIR|PTH1R|S100A12|CCL2|CCL14|CCL23|CCL24|SLC11A1|SNCA|SPN|TEK|LEFTY2|TGFBR2|TLR4|WF…
GO:0001932	6.10061e-11	1	128	1292	regulation of protein phosphorylation	BP	1.0864e-08	94|104|154|177|246|284|408|467|650|659|683|728|857|858|894|948|1030|1326|1440|1490|1601|1634|1636|1839|1843|1850|1906|1910|2013|2022|2167|2192|2247|2263|2264|2268|2357|2549|2621|2662|2690|2852|3071|3084|3491|3553|3569|4091|4616|4915|4921|5028|5155|5168|5319|5320|5322|5334|5581|6237|6283|6347|6358|6368|6369|6556|6622|6693|7010|7044|7048|7078|7099|7128|8322|8613|8654|8835|8850|9021|9314|9353|9365|9…	ACVRL1|ADARB1|ADRB2|AGER|ALOX15|ANGPT1|ARRB1|ATF3|BMP2|BMPR2|BST1|C5AR1|CAV1|CAV2|CCND2|CD36|CDKN2B|MAP3K8|CSF3|CTGF|DAB2|DCN|ACE|HBEGF|DUSP1|DUSP8|EDN1|EDNRB|EMP2|ENG|FABP4|FBLN1|FGF2|FGFR2|FGFR4|FGR|FPR1|GAB1|GAS6|GDF10|GHR|GPER1|NCKAP1L|NRG1|CYR61|IL1B|IL6|SMAD6|GADD45B|NTRK2|DDR2|P2RY1|PDGFB|ENPP2|PLA2G1B|PLA2G2A|PLA2G5|PLCL1|PRKCE|RRAS|S100A12|CCL2|CCL14|CCL23|CCL24|SLC11A1|SNCA|SPN|TEK|LEFT…
GO:0023051	6.68351e-11	1	253	3087	regulation of signaling	BP	1.17668e-08	2|94|153|154|177|185|186|246|284|395|408|467|477|482|590|627|650|659|683|728|845|847|857|858|948|1012|1030|1268|1326|1440|1490|1524|1601|1634|1827|1839|1843|1850|1906|1958|1959|2013|2022|2040|2159|2192|2203|2247|2263|2264|2268|2357|2549|2621|2624|2627|2662|2690|2697|2702|2719|2828|2852|2869|2890|3084|3491|3553|3569|4008|4091|4242|4616|4881|4900|4915|5028|5155|5196|5295|5319|5320|5322|5334|5348|54…	A2M|ACVRL1|ADRB1|ADRB2|AGER|AGTR1|AGTR2|ALOX15|ANGPT1|ARHGAP6|ARRB1|ATF3|ATP1A2|ATP1B2|BCHE|BDNF|BMP2|BMPR2|BST1|C5AR1|CASQ2|CAT|CAV1|CAV2|CD36|CDH13|CDKN2B|CNR1|MAP3K8|CSF3|CTGF|CX3CR1|DAB2|DCN|RCAN1|HBEGF|DUSP1|DUSP8|EDN1|EGR1|EGR2|EMP2|ENG|STOM|F10|FBLN1|FBP1|FGF2|FGFR2|FGFR4|FGR|FPR1|GAB1|GAS6|GATA2|GATA6|GDF10|GHR|GJA1|GJA5|GPC3|GPR4|GPER1|GRK5|GRIA1|NRG1|CYR61|IL1B|IL6|LMO7|SMAD6|MFNG|GADD4…
GO:0061041	7.95705e-11	1	29	128	regulation of wound healing	BP	1.38515e-08	177|710|857|947|948|1361|1839|1906|2160|2207|2247|2697|4638|5155|5581|5588|5592|5627|6347|6403|7048|7056|7099|7128|8613|58189|84959|90102|286133	AGER|SERPING1|CAV1|CD34|CD36|CPB2|HBEGF|EDN1|F11|FCER1G|FGF2|GJA1|MYLK|PDGFB|PRKCE|PRKCQ|PRKG1|PROS1|CCL2|SELP|TGFBR2|THBD|TLR4|TNFAIP3|PLPP3|WFDC1|UBASH3B|PHLDB2|SCARA5
GO:0006468	8.25878e-11	1	169	1851	protein phosphorylation	BP	1.4217e-08	94|104|154|177|246|284|408|467|650|659|660|683|695|728|857|858|894|948|1030|1326|1410|1440|1490|1511|1601|1634|1636|1839|1843|1850|1906|1910|2013|2022|2078|2167|2192|2202|2247|2263|2264|2268|2357|2549|2621|2662|2674|2690|2852|2869|3055|3071|3084|3340|3491|3553|3563|3568|3569|4091|4093|4616|4638|4881|4915|4919|4921|5028|5155|5166|5168|5295|5319|5320|5322|5334|5581|5588|5593|5596|5734|5923|6237|628…	ACVRL1|ADARB1|ADRB2|AGER|ALOX15|ANGPT1|ARRB1|ATF3|BMP2|BMPR2|BMX|BST1|BTK|C5AR1|CAV1|CAV2|CCND2|CD36|CDKN2B|MAP3K8|CRYAB|CSF3|CTGF|CTSG|DAB2|DCN|ACE|HBEGF|DUSP1|DUSP8|EDN1|EDNRB|EMP2|ENG|ERG|FABP4|FBLN1|EFEMP1|FGF2|FGFR2|FGFR4|FGR|FPR1|GAB1|GAS6|GDF10|GFRA1|GHR|GPER1|GRK5|HCK|NCKAP1L|NRG1|NDST1|CYR61|IL1B|IL3RA|IL5RA|IL6|SMAD6|SMAD9|GADD45B|MYLK|NPR1|NTRK2|ROR1|DDR2|P2RY1|PDGFB|PDK4|ENPP2|PIK3R1|…
GO:0044057	8.66102e-11	1	65	493	regulation of system process	BP	1.46901e-08	153|154|185|186|358|477|482|554|659|745|845|857|1264|1490|1636|1674|1839|1906|1910|2013|2034|2621|2697|2702|2852|3084|3553|3569|3762|3777|4881|5023|5155|5348|5592|5800|6330|6442|6446|6505|6909|7134|7136|7402|8013|8654|8862|9254|9314|9732|10203|10398|10659|10810|23493|27129|29995|51196|53826|55273|56729|80223|126393|255743|338442	ADRB1|ADRB2|AGTR1|AGTR2|AQP1|ATP1A2|ATP1B2|AVPR2|BMPR2|MYRF|CASQ2|CAV1|CNN1|CTGF|ACE|DES|HBEGF|EDN1|EDNRB|EMP2|EPAS1|GAS6|GJA1|GJA5|GPER1|NRG1|IL1B|IL6|KCNJ5|KCNK3|NPR1|P2RX1|PDGFB|FXYD1|PRKG1|PTPRO|SCN4B|SGCA|SGK1|SLC1A1|TBX2|TNNC1|TNNI2|UTRN|NR4A3|PDE5A|APLN|CACNA2D2|KLF4|DOCK4|CALCRL|MYL9|CELF2|WASF3|HEY2|HSPB7|LMCD1|PLCE1|FXYD6|TMEM100|RETN|RAB11FIP1|HSPB6|NPNT|HCAR2
GO:0042221	8.72322e-11	1	305	4132	response to chemical	BP	1.46901e-08	21|32|94|177|181|185|186|241|246|284|306|322|358|361|366|408|467|477|554|590|627|650|659|683|687|695|712|728|761|845|847|857|858|947|948|968|1003|1012|1030|1036|1268|1271|1361|1410|1440|1490|1511|1524|1536|1572|1580|1601|1634|1808|1839|1843|1901|1906|1910|1958|1959|1960|2022|2034|2115|2167|2203|2207|2247|2263|2264|2277|2294|2327|2328|2353|2354|2357|2358|2532|2549|2621|2624|2627|2662|2674|2690|269…	ABCA3|ACACB|ACVRL1|AGER|AGRP|AGTR1|AGTR2|ALOX5AP|ALOX15|ANGPT1|ANXA3|APBB1|AQP1|AQP4|AQP9|ARRB1|ATF3|ATP1A2|AVPR2|BCHE|BDNF|BMP2|BMPR2|BST1|KLF9|BTK|C1QA|C5AR1|CA3|CASQ2|CAT|CAV1|CAV2|CD34|CD36|CD68|CDH5|CDH13|CDKN2B|CDO1|CNR1|CNTFR|CPB2|CRYAB|CSF3|CTGF|CTSG|CX3CR1|CYBB|CYP2F1|CYP4B1|DAB2|DCN|DPYSL2|HBEGF|DUSP1|S1PR1|EDN1|EDNRB|EGR1|EGR2|EGR3|ENG|EPAS1|ETV1|FABP4|FBP1|FCER1G|FGF2|FGFR2|FGFR4|VEGF…
GO:0030036	9.63072e-11	1	74	579	actin cytoskeleton organization	BP	1.6044e-08	246|358|395|408|683|845|1073|1264|1440|1490|1901|1906|2013|2037|2824|3055|3071|4628|4629|4739|5295|5319|5581|5592|5734|6369|6387|6711|7010|7111|7148|9037|9353|9535|9647|9912|10129|10174|10391|10395|10529|10580|10810|11013|11346|22808|22885|22899|22998|25802|27063|28984|30846|54959|57381|57477|57580|58529|80122|83700|85358|85458|90102|91663|93663|130271|133522|152273|171024|221692|257019|359845|37…	ALOX15|AQP1|ARHGAP6|ARRB1|BST1|CASQ2|CFL2|CNN1|CSF3|CTGF|S1PR1|EDN1|EMP2|EPB41L2|GPM6B|HCK|NCKAP1L|MYH10|MYH11|NEDD9|PIK3R1|PLA2G1B|PRKCE|PRKG1|PTGER4|CCL24|CXCL12|SPTBN1|TEK|TMOD1|TNXB|SEMA5A|SLIT2|GMFG|PPM1F|ARHGAP44|FRY|SORBS3|CORO2B|DLC1|NEBL|SORBS1|WASF3|TMSB15A|SYNPO|MRAS|ABLIM3|ARHGEF15|LIMCH1|LMOD1|ANKRD1|RGCC|EHD2|ODAM|RHOJ|SHROOM4|PREX1|MYOZ1|MAP3K19|JAM3|SHANK3|DIXDC1|PHLDB2|MYADM|ARHG…
GO:0007167	1.01701e-10	1	106	975	enzyme linked receptor protein signaling pathway	BP	1.67622e-08	94|154|186|284|627|650|659|660|695|857|858|1003|1012|1030|1285|1490|1536|1601|1634|1839|1958|2022|2202|2247|2263|2264|2268|2277|2353|2549|2621|2627|2662|2674|2690|2719|2852|3055|3071|3084|3340|3491|3553|3730|3977|4091|4093|4688|4881|4915|4919|4921|5155|5166|5295|5588|5739|5789|6347|6383|6456|6503|6622|6711|6935|7010|7044|7048|7049|7122|8322|8425|8516|8835|9021|9046|9068|9365|9770|10580|23090|2376…	ACVRL1|ADRB2|AGTR2|ANGPT1|BDNF|BMP2|BMPR2|BMX|BTK|CAV1|CAV2|CDH5|CDH13|CDKN2B|COL4A3|CTGF|CYBB|DAB2|DCN|HBEGF|EGR1|ENG|EFEMP1|FGF2|FGFR2|FGFR4|FGR|VEGFD|FOS|GAB1|GAS6|GATA6|GDF10|GFRA1|GHR|GPC3|GPER1|HCK|NCKAP1L|NRG1|NDST1|CYR61|IL1B|ANOS1|LIFR|SMAD6|SMAD9|NCF2|NPR1|NTRK2|ROR1|DDR2|PDGFB|PDK4|PIK3R1|PRKCQ|PTGIR|PTPRD|CCL2|SDC2|SH3GL2|SLA|SNCA|SPTBN1|ZEB1|TEK|LEFTY2|TGFBR2|TGFBR3|CLDN5|FZD4|LTBP4|…
GO:0050790	1.12337e-10	1	203	2390	regulation of catalytic activity	BP	1.83204e-08	2|32|104|153|154|177|185|186|216|241|284|306|341|358|395|408|482|554|650|710|728|857|858|894|1030|1268|1285|1326|1473|1490|1634|1636|1827|1839|1843|1850|1901|1906|1910|2013|2167|2192|2247|2263|2264|2268|2357|2549|2621|2674|2690|2719|2852|3071|3084|3316|3491|3553|3563|3568|3569|3730|3953|4616|4883|4915|4921|5023|5155|5295|5319|5322|5468|5581|5588|5592|5593|5627|5739|5806|5923|6283|6347|6358|6368|6…	A2M|ACACB|ADARB1|ADRB1|ADRB2|AGER|AGTR1|AGTR2|ALDH1A1|ALOX5AP|ANGPT1|ANXA3|APOC1|AQP1|ARHGAP6|ARRB1|ATP1B2|AVPR2|BMP2|SERPING1|C5AR1|CAV1|CAV2|CCND2|CDKN2B|CNR1|COL4A3|MAP3K8|CST5|CTGF|DCN|ACE|RCAN1|HBEGF|DUSP1|DUSP8|S1PR1|EDN1|EDNRB|EMP2|FABP4|FBLN1|FGF2|FGFR2|FGFR4|FGR|FPR1|GAB1|GAS6|GFRA1|GHR|GPC3|GPER1|NCKAP1L|NRG1|HSPB2|CYR61|IL1B|IL3RA|IL5RA|IL6|ANOS1|LEPR|GADD45B|NPR3|NTRK2|DDR2|P2RX1|PDGF…
GO:0048522	1.15922e-10	1	355	4751	positive regulation of cellular process	BP	1.87081e-08	32|94|104|153|154|177|185|186|246|284|306|322|341|358|395|408|467|482|554|627|650|659|683|695|728|729|745|845|847|857|858|894|947|948|1003|1012|1030|1073|1268|1271|1285|1316|1326|1361|1440|1490|1524|1536|1601|1634|1636|1839|1843|1901|1906|1910|1958|1959|1960|2013|2022|2034|2040|2078|2115|2159|2192|2207|2219|2247|2263|2264|2268|2277|2294|2313|2353|2354|2357|2549|2621|2624|2627|2662|2690|2697|2702|…	ACACB|ACVRL1|ADARB1|ADRB1|ADRB2|AGER|AGTR1|AGTR2|ALOX15|ANGPT1|ANXA3|APBB1|APOC1|AQP1|ARHGAP6|ARRB1|ATF3|ATP1B2|AVPR2|BDNF|BMP2|BMPR2|BST1|BTK|C5AR1|C6|MYRF|CASQ2|CAT|CAV1|CAV2|CCND2|CD34|CD36|CDH5|CDH13|CDKN2B|CFL2|CNR1|CNTFR|COL4A3|KLF6|MAP3K8|CPB2|CSF3|CTGF|CX3CR1|CYBB|DAB2|DCN|ACE|HBEGF|DUSP1|S1PR1|EDN1|EDNRB|EGR1|EGR2|EGR3|EMP2|ENG|EPAS1|STOM|ERG|ETV1|F10|FBLN1|FCER1G|FCN1|FGF2|FGFR2|FGFR4|F…
GO:0045321	1.42852e-10	1	117	1190	leukocyte activation	BP	2.28165e-08	177|240|306|660|683|695|728|820|847|857|945|948|968|976|1178|1268|1316|1326|1511|1524|1536|1675|1906|1958|1960|2040|2171|2207|2215|2219|2268|2294|2352|2357|2358|2615|2621|2624|2852|3043|3071|3101|3133|3142|3553|3569|3575|3577|3579|3953|4242|4311|4332|4973|5023|5175|5199|5295|5473|5551|5581|5588|5734|5787|5806|6283|6347|6404|6441|6556|6590|6622|6688|6693|6935|7048|7099|7128|7305|7356|7704|7940|801…	AGER|ALOX5|ANXA3|BMX|BST1|BTK|C5AR1|CAMP|CAT|CAV1|CD33|CD36|CD68|ADGRE5|CLC|CNR1|KLF6|MAP3K8|CTSG|CX3CR1|CYBB|CFD|EDN1|EGR1|EGR3|STOM|FABP5|FCER1G|FCGR3B|FCN1|FGR|FOXF1|FOLR3|FPR1|FPR2|LRRC32|GAS6|GATA2|GPER1|HBB|NCKAP1L|HK3|HLA-E|HLX|IL1B|IL6|IL7R|CXCR1|CXCR2|LEPR|MFNG|MME|MNDA|OLR1|P2RX1|PECAM1|CFP|PIK3R1|PPBP|PRF1|PRKCE|PRKCQ|PTGER4|PTPRB|PTX3|S100A12|CCL2|SELPLG|SFTPD|SLC11A1|SLPI|SNCA|SPI1|S…
GO:0010646	1.44797e-10	1	248	3035	regulation of cell communication	BP	2.28912e-08	2|94|153|154|177|185|186|246|284|395|408|467|477|590|627|650|659|683|728|845|847|857|858|948|1012|1030|1268|1326|1440|1490|1524|1601|1634|1827|1839|1843|1850|1906|1958|1959|2013|2022|2040|2159|2192|2203|2247|2263|2264|2268|2357|2549|2621|2624|2627|2662|2690|2697|2702|2719|2828|2852|2869|2890|3084|3491|3553|3569|4091|4242|4616|4900|4915|5028|5155|5196|5295|5319|5320|5322|5334|5414|5468|5581|5588|5…	A2M|ACVRL1|ADRB1|ADRB2|AGER|AGTR1|AGTR2|ALOX15|ANGPT1|ARHGAP6|ARRB1|ATF3|ATP1A2|BCHE|BDNF|BMP2|BMPR2|BST1|C5AR1|CASQ2|CAT|CAV1|CAV2|CD36|CDH13|CDKN2B|CNR1|MAP3K8|CSF3|CTGF|CX3CR1|DAB2|DCN|RCAN1|HBEGF|DUSP1|DUSP8|EDN1|EGR1|EGR2|EMP2|ENG|STOM|F10|FBLN1|FBP1|FGF2|FGFR2|FGFR4|FGR|FPR1|GAB1|GAS6|GATA2|GATA6|GDF10|GHR|GJA1|GJA5|GPC3|GPR4|GPER1|GRK5|GRIA1|NRG1|CYR61|IL1B|IL6|SMAD6|MFNG|GADD45B|NRGN|NTRK…
GO:0065009	1.72348e-10	1	240	2957	regulation of molecular function	BP	2.69715e-08	2|32|104|153|154|177|185|186|216|241|284|306|341|358|395|408|477|482|554|627|650|695|710|728|845|847|857|858|894|1030|1268|1285|1326|1440|1473|1490|1601|1634|1636|1827|1839|1843|1850|1901|1906|1910|2013|2040|2167|2192|2247|2263|2264|2268|2273|2353|2357|2549|2621|2674|2690|2697|2719|2852|3055|3071|3084|3316|3491|3553|3563|3568|3569|3730|3953|4242|4616|4883|4915|4921|5023|5028|5155|5243|5295|5319|5…	A2M|ACACB|ADARB1|ADRB1|ADRB2|AGER|AGTR1|AGTR2|ALDH1A1|ALOX5AP|ANGPT1|ANXA3|APOC1|AQP1|ARHGAP6|ARRB1|ATP1A2|ATP1B2|AVPR2|BDNF|BMP2|BTK|SERPING1|C5AR1|CASQ2|CAT|CAV1|CAV2|CCND2|CDKN2B|CNR1|COL4A3|MAP3K8|CSF3|CST5|CTGF|DAB2|DCN|ACE|RCAN1|HBEGF|DUSP1|DUSP8|S1PR1|EDN1|EDNRB|EMP2|STOM|FABP4|FBLN1|FGF2|FGFR2|FGFR4|FGR|FHL1|FOS|FPR1|GAB1|GAS6|GFRA1|GHR|GJA1|GPC3|GPER1|HCK|NCKAP1L|NRG1|HSPB2|CYR61|IL1B|IL…
GO:1902578	1.78367e-10	1	257	3230	single-organism localization	BP	2.76343e-08	2|21|32|185|186|240|246|284|306|322|341|358|361|366|408|477|482|554|667|683|695|710|728|820|845|847|857|945|947|948|968|976|1036|1262|1268|1346|1361|1440|1490|1511|1536|1601|1636|1675|1906|1910|2013|2022|2040|2157|2171|2207|2214|2215|2219|2247|2268|2273|2277|2294|2352|2357|2358|2615|2621|2624|2697|2702|2719|2824|2852|2890|3039|3040|3043|3055|3071|3084|3101|3133|3553|3569|3577|3579|3762|3772|3777|…	A2M|ABCA3|ACACB|AGTR1|AGTR2|ALOX5|ALOX15|ANGPT1|ANXA3|APBB1|APOC1|AQP1|AQP4|AQP9|ARRB1|ATP1A2|ATP1B2|AVPR2|DST|BST1|BTK|SERPING1|C5AR1|CAMP|CASQ2|CAT|CAV1|CD33|CD34|CD36|CD68|ADGRE5|CDO1|CNGA4|CNR1|COX7A1|CPB2|CSF3|CTGF|CTSG|CYBB|DAB2|ACE|CFD|EDN1|EDNRB|EMP2|ENG|STOM|F8|FABP5|FCER1G|FCGR3A|FCGR3B|FCN1|FGF2|FGR|FHL1|VEGFD|FOXF1|FOLR3|FPR1|FPR2|LRRC32|GAS6|GATA2|GJA1|GJA5|GPC3|GPM6B|GPER1|GRIA1|HBA…
GO:0050900	2.07445e-10	1	59	454	leukocyte migration	BP	3.18213e-08	284|482|683|728|857|947|1901|1906|1910|2207|2277|2357|2358|2621|2920|2921|2995|3055|3071|3553|3569|3577|3579|4973|5155|5175|5196|5295|5319|5473|5627|5734|5800|6283|6347|6358|6368|6369|6383|6387|6401|6403|6404|6441|6693|7010|7056|9046|9056|9353|23604|51744|57580|58494|83700|90865|90952|120425|140885	ANGPT1|ATP1B2|BST1|C5AR1|CAV1|CD34|S1PR1|EDN1|EDNRB|FCER1G|VEGFD|FPR1|FPR2|GAS6|CXCL2|CXCL3|GYPC|HCK|NCKAP1L|IL1B|IL6|CXCR1|CXCR2|OLR1|PDGFB|PECAM1|PF4|PIK3R1|PLA2G1B|PPBP|PROS1|PTGER4|PTPRO|S100A12|CCL2|CCL14|CCL23|CCL24|SDC2|CXCL12|SELE|SELP|SELPLG|SFTPD|SPN|TEK|THBD|DOK2|SLC7A7|SLIT2|DAPK2|CD244|PREX1|JAM2|JAM3|IL33|ESAM|JAML|SIRPA
GO:1990266	3.49436e-10	1	22	95	neutrophil migration	BP	5.30766e-08	683|728|1906|2207|2920|2921|3071|3553|3579|5196|5319|5473|6283|6347|6358|6368|6369|9353|23604|57580|83700|120425	BST1|C5AR1|EDN1|FCER1G|CXCL2|CXCL3|NCKAP1L|IL1B|CXCR2|PF4|PLA2G1B|PPBP|S100A12|CCL2|CCL14|CCL23|CCL24|SLIT2|DAPK2|PREX1|JAM3|JAML
GO:0050878	3.59726e-10	1	64	504	regulation of body fluid levels	BP	5.4109e-08	2|187|358|361|408|554|710|857|947|948|1036|1361|1906|1910|2013|2157|2159|2160|2192|2207|2313|2621|2624|2627|2697|2702|3043|3569|4881|4883|5023|5028|5155|5196|5295|5581|5588|5592|5627|5800|6403|7056|7099|7450|7466|8862|9002|9060|10398|10630|11234|22915|23533|23764|30846|57493|80274|84959|89780|139818|140628|196883|286133|653145	A2M|APLNR|AQP1|AQP4|ARRB1|AVPR2|SERPING1|CAV1|CD34|CD36|CDO1|CPB2|EDN1|EDNRB|EMP2|F8|F10|F11|FBLN1|FCER1G|FLI1|GAS6|GATA2|GATA6|GJA1|GJA5|HBB|IL6|NPR1|NPR3|P2RX1|P2RY1|PDGFB|PF4|PIK3R1|PRKCE|PRKCQ|PRKG1|PROS1|PTPRO|SELP|THBD|TLR4|VWF|WFS1|APLN|F2RL3|PAPSS2|MYL9|PDPN|HPS5|MMRN1|PIK3R5|MAFF|EHD2|HEG1|SCUBE1|UBASH3B|WNT3A|DOCK11|GATA5|ADCY4|SCARA5|ANXA8
GO:0045055	5.71974e-10	1	82	739	regulated exocytosis	BP	8.52076e-08	2|240|306|683|695|710|728|820|847|945|948|968|976|1511|1536|1675|2040|2157|2171|2207|2215|2219|2268|2277|2294|2352|2357|2358|2621|2624|3043|3055|3071|3101|3577|3579|4311|4332|4973|5023|5155|5175|5196|5199|5473|5627|5787|5806|6283|6403|6414|6556|6590|7044|7078|7123|7305|7450|8013|8676|9535|9749|10326|11025|11069|22915|22918|25840|50487|56729|80223|80301|84106|84658|120892|126014|140885|150372|1603…	A2M|ALOX5|ANXA3|BST1|BTK|SERPING1|C5AR1|CAMP|CAT|CD33|CD36|CD68|ADGRE5|CTSG|CYBB|CFD|STOM|F8|FABP5|FCER1G|FCGR3B|FCN1|FGR|VEGFD|FOXF1|FOLR3|FPR1|FPR2|GAS6|GATA2|HBB|HCK|NCKAP1L|HK3|CXCR1|CXCR2|MME|MNDA|OLR1|P2RX1|PDGFB|PECAM1|PF4|CFP|PPBP|PROS1|PTPRB|PTX3|S100A12|SELP|SELENOP|SLC11A1|SLPI|LEFTY2|TIMP3|CLEC3B|TYROBP|VWF|NR4A3|STX11|GMFG|PHACTR2|SIRPB1|LILRB3|RAPGEF4|MMRN1|CD93|METTL7A|PLA2G3|RETN|…
GO:0071495	5.79033e-10	1	122	1230	cellular response to endogenous stimulus	BP	8.54377e-08	94|181|185|186|358|366|477|554|650|659|687|845|857|858|948|1003|1012|1030|1490|1524|1536|1601|1843|1906|1958|1960|2022|2207|2247|2263|2264|2353|2354|2549|2627|2662|2690|2719|2791|2819|2852|3036|3164|3340|3373|3491|3553|3569|3727|3730|3949|3953|4005|4023|4091|4093|4915|5138|5155|5166|5251|5295|5319|5468|5581|5588|5734|5737|6092|6258|6347|6456|6532|6586|6622|6751|6935|6943|7044|7048|7049|7122|7123|…	ACVRL1|AGRP|AGTR1|AGTR2|AQP1|AQP9|ATP1A2|AVPR2|BMP2|BMPR2|KLF9|CASQ2|CAV1|CAV2|CD36|CDH5|CDH13|CDKN2B|CTGF|CX3CR1|CYBB|DAB2|DUSP1|EDN1|EGR1|EGR3|ENG|FCER1G|FGF2|FGFR2|FGFR4|FOS|FOSB|GAB1|GATA6|GDF10|GHR|GPC3|GNG11|GPD1|GPER1|HAS1|NR4A1|NDST1|HYAL1|CYR61|IL1B|IL6|JUND|ANOS1|LDLR|LEPR|LMO2|LPL|SMAD6|SMAD9|NTRK2|PDE2A|PDGFB|PDK4|PHEX|PIK3R1|PLA2G1B|PPARG|PRKCE|PRKCQ|PTGER4|PTGFR|ROBO2|RXRG|CCL2|SH3G…
GO:0009966	6.42197e-10	1	225	2734	regulation of signal transduction	BP	9.38638e-08	2|94|153|154|177|186|246|284|395|408|467|627|650|659|683|728|845|847|857|858|948|1012|1030|1326|1440|1490|1601|1634|1827|1839|1843|1850|1906|1958|2013|2022|2040|2159|2192|2203|2247|2263|2264|2268|2357|2549|2621|2624|2627|2662|2690|2697|2719|2828|2852|2869|3084|3491|3553|3569|4091|4242|4616|4915|5028|5155|5196|5295|5319|5320|5322|5414|5468|5581|5588|5739|5740|5800|5923|6237|6283|6347|6358|6368|636…	A2M|ACVRL1|ADRB1|ADRB2|AGER|AGTR2|ALOX15|ANGPT1|ARHGAP6|ARRB1|ATF3|BDNF|BMP2|BMPR2|BST1|C5AR1|CASQ2|CAT|CAV1|CAV2|CD36|CDH13|CDKN2B|MAP3K8|CSF3|CTGF|DAB2|DCN|RCAN1|HBEGF|DUSP1|DUSP8|EDN1|EGR1|EMP2|ENG|STOM|F10|FBLN1|FBP1|FGF2|FGFR2|FGFR4|FGR|FPR1|GAB1|GAS6|GATA2|GATA6|GDF10|GHR|GJA1|GPC3|GPR4|GPER1|GRK5|NRG1|CYR61|IL1B|IL6|SMAD6|MFNG|GADD45B|NTRK2|P2RY1|PDGFB|PF4|PIK3R1|PLA2G1B|PLA2G2A|PLA2G5|SEP…
GO:0009719	6.57127e-10	1	146	1581	response to endogenous stimulus	BP	9.51483e-08	21|94|181|185|186|306|358|366|477|554|590|650|659|687|728|845|847|857|858|948|1003|1012|1030|1036|1268|1490|1524|1536|1601|1843|1906|1958|1959|1960|2022|2207|2247|2263|2264|2353|2354|2549|2627|2662|2690|2697|2719|2791|2819|2852|3036|3164|3340|3373|3491|3553|3569|3727|3730|3949|3953|4005|4023|4091|4093|4129|4327|4915|5023|5138|5153|5155|5166|5251|5295|5319|5322|5468|5581|5588|5734|5737|6092|6258|6…	ABCA3|ACVRL1|AGRP|AGTR1|AGTR2|ANXA3|AQP1|AQP9|ATP1A2|AVPR2|BCHE|BMP2|BMPR2|KLF9|C5AR1|CASQ2|CAT|CAV1|CAV2|CD36|CDH5|CDH13|CDKN2B|CDO1|CNR1|CTGF|CX3CR1|CYBB|DAB2|DUSP1|EDN1|EGR1|EGR2|EGR3|ENG|FCER1G|FGF2|FGFR2|FGFR4|FOS|FOSB|GAB1|GATA6|GDF10|GHR|GJA1|GPC3|GNG11|GPD1|GPER1|HAS1|NR4A1|NDST1|HYAL1|CYR61|IL1B|IL6|JUND|ANOS1|LDLR|LEPR|LMO2|LPL|SMAD6|SMAD9|MAOB|MMP19|NTRK2|P2RX1|PDE2A|PDE1B|PDGFB|PDK4|P…
GO:0002682	6.94507e-10	1	130	1421	regulation of immune system process	BP	9.96296e-08	2|177|246|284|683|695|710|712|713|714|728|729|730|732|857|945|947|948|1178|1268|1326|1440|1511|1636|1675|1906|1960|2206|2207|2214|2219|2268|2277|2294|2353|2357|2358|2615|2621|2624|2852|2920|2921|3055|3071|3133|3142|3202|3384|3553|3569|3575|4211|4332|5196|5199|5295|5319|5468|5473|5581|5588|5627|5734|5950|6347|6369|6387|6403|6441|6556|6622|6688|6693|6886|6935|7048|7099|7128|7305|7356|7538|7704|7940…	A2M|AGER|ALOX15|ANGPT1|BST1|BTK|SERPING1|C1QA|C1QB|C1QC|C5AR1|C6|C7|C8B|CAV1|CD33|CD34|CD36|CLC|CNR1|MAP3K8|CSF3|CTSG|ACE|CFD|EDN1|EGR3|MS4A2|FCER1G|FCGR3A|FCN1|FGR|VEGFD|FOXF1|FOS|FPR1|FPR2|LRRC32|GAS6|GATA2|GPER1|CXCL2|CXCL3|HCK|NCKAP1L|HLA-E|HLX|HOXA5|ICAM2|IL1B|IL6|IL7R|MEIS1|MNDA|PF4|CFP|PIK3R1|PLA2G1B|PPARG|PPBP|PRKCE|PRKCQ|PROS1|PTGER4|RBP4|CCL2|CCL24|CXCL12|SELP|SFTPD|SLC11A1|SNCA|SPI1|SP…
GO:1904018	7.20715e-10	1	29	139	positive regulation of vasculature development	BP	1.02441e-07	94|306|358|728|729|947|1524|1536|1958|2022|2247|2277|2624|2627|2852|3373|3553|5155|5740|6237|6369|7010|7048|8742|9037|10266|23328|55273|126393	ACVRL1|ANXA3|AQP1|C5AR1|C6|CD34|CX3CR1|CYBB|EGR1|ENG|FGF2|VEGFD|GATA2|GATA6|GPER1|HYAL1|IL1B|PDGFB|PTGIS|RRAS|CCL24|TEK|TGFBR2|TNFSF12|SEMA5A|RAMP2|SASH1|TMEM100|HSPB6
GO:0070372	8.43816e-10	1	39	247	regulation of ERK1 and ERK2 cascade	BP	1.18848e-07	246|284|408|467|650|728|948|1490|1843|2192|2247|2263|2264|2621|2852|3491|3569|5028|5155|5320|5322|6237|6347|6358|6368|6369|7010|7078|7099|9314|57447|65009|152007|168667|255743|285016|338557|388121|388325	ALOX15|ANGPT1|ARRB1|ATF3|BMP2|C5AR1|CD36|CTGF|DUSP1|FBLN1|FGF2|FGFR2|FGFR4|GAS6|GPER1|CYR61|IL6|P2RY1|PDGFB|PLA2G2A|PLA2G5|RRAS|CCL2|CCL14|CCL23|CCL24|TEK|TIMP3|TLR4|KLF4|NDRG2|NDRG4|GLIPR2|BMPER|NPNT|ALKAL2|FFAR4|TNFAIP8L3|SCIMP
GO:0097529	9.4498e-10	1	30	166	myeloid leukocyte migration	BP	1.31897e-07	683|728|1906|1910|2207|2277|2920|2921|3071|3553|3569|3579|5155|5196|5319|5473|5734|5800|6283|6347|6358|6368|6369|6387|6441|9353|23604|57580|83700|120425	BST1|C5AR1|EDN1|EDNRB|FCER1G|VEGFD|CXCL2|CXCL3|NCKAP1L|IL1B|IL6|CXCR2|PDGFB|PF4|PLA2G1B|PPBP|PTGER4|PTPRO|S100A12|CCL2|CCL14|CCL23|CCL24|CXCL12|SFTPD|SLIT2|DAPK2|PREX1|JAM3|JAML
GO:1901700	1.07438e-09	1	137	1491	response to oxygen-containing compound	BP	1.48619e-07	177|181|185|186|358|366|408|477|554|590|687|695|728|761|847|857|858|948|1036|1268|1361|1410|1440|1490|1511|1524|1536|1634|1843|1906|1910|1958|1959|2353|2354|2549|2621|2690|2697|2791|2819|2852|2878|2920|2921|3039|3040|3043|3055|3164|3373|3553|3569|3727|3949|4023|4129|4327|4360|4688|4915|5023|5138|5155|5166|5196|5251|5295|5319|5322|5468|5473|5581|5588|5734|5737|5739|5950|6347|6387|6401|6403|6532|65…	AGER|AGRP|AGTR1|AGTR2|AQP1|AQP9|ARRB1|ATP1A2|AVPR2|BCHE|KLF9|BTK|C5AR1|CA3|CAT|CAV1|CAV2|CD36|CDO1|CNR1|CPB2|CRYAB|CSF3|CTGF|CTSG|CX3CR1|CYBB|DCN|DUSP1|EDN1|EDNRB|EGR1|EGR2|FOS|FOSB|GAB1|GAS6|GHR|GJA1|GNG11|GPD1|GPER1|GPX3|CXCL2|CXCL3|HBA1|HBA2|HBB|HCK|NR4A1|HYAL1|IL1B|IL6|JUND|LDLR|LPL|MAOB|MMP19|MRC1|NCF2|NTRK2|P2RX1|PDE2A|PDGFB|PDK4|PF4|PHEX|PIK3R1|PLA2G1B|PLA2G5|PPARG|PPBP|PRKCE|PRKCQ|PTGER4|…
GO:0008285	1.19716e-09	1	74	640	negative regulation of cell proliferation	BP	1.64139e-07	94|104|186|590|650|659|687|695|857|858|945|1003|1012|1030|1264|1285|1361|1602|1805|2192|2263|2615|2624|2697|2719|2852|3553|3569|3851|4091|4332|4881|4883|4969|5376|5468|5739|5745|5950|6368|6425|6441|6532|6586|6693|6751|6910|6935|7048|7049|7128|7356|7704|7832|7940|8654|8850|9314|9510|10395|11095|11326|23371|25959|27306|28984|51621|55214|55679|57447|58189|65009|83595|84913	ACVRL1|ADARB1|AGTR2|BCHE|BMP2|BMPR2|KLF9|BTK|CAV1|CAV2|CD33|CDH5|CDH13|CDKN2B|CNN1|COL4A3|CPB2|DACH1|DPT|FBLN1|FGFR2|LRRC32|GATA2|GJA1|GPC3|GPER1|IL1B|IL6|KRT4|SMAD6|MNDA|NPR1|NPR3|OGN|PMP22|PPARG|PTGIR|PTH1R|RBP4|CCL23|SFRP5|SFTPD|SLC6A4|SLIT3|SPN|SSTR1|TBX5|ZEB1|TGFBR2|TGFBR3|TNFAIP3|SCGB1A1|ZBTB16|BTG2|LST1|PDE5A|KAT2B|KLF4|ADAMTS1|DLC1|ADAMTS8|VSIG4|TNS2|KANK2|HPGDS|RGCC|KLF13|P3H2|LIMS2|NDRG…
GO:0072593	1.36566e-09	1	38	236	reactive oxygen species metabolic process	BP	1.85599e-07	185|186|683|847|857|947|948|1410|1490|1536|1906|2878|3039|3040|3043|3491|3553|3569|4129|4688|5155|5166|5740|5806|6441|6622|7048|7099|9314|10365|10516|27244|53905|55022|57580|90527|120892|653361	AGTR1|AGTR2|BST1|CAT|CAV1|CD34|CD36|CRYAB|CTGF|CYBB|EDN1|GPX3|HBA1|HBA2|HBB|CYR61|IL1B|IL6|MAOB|NCF2|PDGFB|PDK4|PTGIS|PTX3|SFTPD|SNCA|TGFBR2|TLR4|KLF4|KLF2|FBLN5|SESN1|DUOX1|PID1|PREX1|DUOXA1|LRRK2|NCF1
GO:0002444	1.48336e-09	1	64	540	myeloid leukocyte mediated immunity	BP	1.99841e-07	240|306|683|695|728|820|847|945|948|968|976|1511|1536|1636|1675|2040|2171|2207|2215|2219|2268|2294|2352|2357|2358|2624|3043|3071|3101|3569|3577|3579|4311|4332|4973|5023|5175|5199|5319|5473|5787|5806|6283|6556|6590|7305|8013|9535|10326|11025|22918|25840|50487|56729|80301|84106|84658|126014|140885|150372|160364|199675|353189|100049587	ALOX5|ANXA3|BST1|BTK|C5AR1|CAMP|CAT|CD33|CD36|CD68|ADGRE5|CTSG|CYBB|ACE|CFD|STOM|FABP5|FCER1G|FCGR3B|FCN1|FGR|FOXF1|FOLR3|FPR1|FPR2|GATA2|HBB|NCKAP1L|HK3|IL6|CXCR1|CXCR2|MME|MNDA|OLR1|P2RX1|PECAM1|CFP|PLA2G1B|PPBP|PTPRB|PTX3|S100A12|SLC11A1|SLPI|TYROBP|NR4A3|GMFG|SIRPB1|LILRB3|CD93|METTL7A|PLA2G3|RETN|PLEKHO2|PRAM1|ADGRE3|OSCAR|SIRPA|NFAM1|CLEC12A|MCEMP1|SLCO4C1|SIGLEC14
GO:1903034	1.55926e-09	1	30	151	regulation of response to wounding	BP	2.08256e-07	177|710|857|947|948|1361|1839|1906|2160|2207|2247|2697|4638|5155|5581|5588|5592|5627|6347|6403|7048|7056|7099|7128|8613|9314|58189|84959|90102|286133	AGER|SERPING1|CAV1|CD34|CD36|CPB2|HBEGF|EDN1|F11|FCER1G|FGF2|GJA1|MYLK|PDGFB|PRKCE|PRKCQ|PRKG1|PROS1|CCL2|SELP|TGFBR2|THBD|TLR4|TNFAIP3|PLPP3|KLF4|WFDC1|UBASH3B|PHLDB2|SCARA5
GO:0030595	1.63146e-09	1	32	191	leukocyte chemotaxis	BP	2.16036e-07	683|728|1901|1906|1910|2207|2277|2621|2920|2921|3071|3553|3569|3577|3579|5155|5196|5319|5473|5800|6283|6347|6358|6368|6369|6387|6441|9353|23604|57580|83700|120425	BST1|C5AR1|S1PR1|EDN1|EDNRB|FCER1G|VEGFD|GAS6|CXCL2|CXCL3|NCKAP1L|IL1B|IL6|CXCR1|CXCR2|PDGFB|PF4|PLA2G1B|PPBP|PTPRO|S100A12|CCL2|CCL14|CCL23|CCL24|CXCL12|SFTPD|SLIT2|DAPK2|PREX1|JAM3|JAML
GO:0007599	1.73693e-09	1	49	353	hemostasis	BP	2.28053e-07	2|408|554|710|857|947|948|1361|1906|2157|2159|2160|2192|2207|2313|2621|2624|2627|3043|3569|5023|5028|5155|5196|5295|5581|5588|5592|5627|6403|7056|7099|7450|9002|9060|10398|10630|11234|22915|23533|23764|30846|80274|84959|89780|139818|140628|286133|653145	A2M|ARRB1|AVPR2|SERPING1|CAV1|CD34|CD36|CPB2|EDN1|F8|F10|F11|FBLN1|FCER1G|FLI1|GAS6|GATA2|GATA6|HBB|IL6|P2RX1|P2RY1|PDGFB|PF4|PIK3R1|PRKCE|PRKCQ|PRKG1|PROS1|SELP|THBD|TLR4|VWF|F2RL3|PAPSS2|MYL9|PDPN|HPS5|MMRN1|PIK3R5|MAFF|EHD2|SCUBE1|UBASH3B|WNT3A|DOCK11|GATA5|SCARA5|ANXA8
GO:0070371	1.81238e-09	1	40	263	ERK1 and ERK2 cascade	BP	2.3596e-07	246|284|408|467|650|728|948|1490|1843|2192|2247|2263|2264|2621|2852|3491|3569|5028|5155|5320|5322|5734|6237|6347|6358|6368|6369|7010|7078|7099|9314|57447|65009|152007|168667|255743|285016|338557|388121|388325	ALOX15|ANGPT1|ARRB1|ATF3|BMP2|C5AR1|CD36|CTGF|DUSP1|FBLN1|FGF2|FGFR2|FGFR4|GAS6|GPER1|CYR61|IL6|P2RY1|PDGFB|PLA2G2A|PLA2G5|PTGER4|RRAS|CCL2|CCL14|CCL23|CCL24|TEK|TIMP3|TLR4|KLF4|NDRG2|NDRG4|GLIPR2|BMPER|NPNT|ALKAL2|FFAR4|TNFAIP8L3|SCIMP
GO:0070848	2.48317e-09	1	75	645	response to growth factor	BP	3.20597e-07	94|186|306|650|659|847|857|858|1003|1030|1490|1524|1601|1634|1906|1958|1960|2022|2247|2263|2264|2353|2549|2621|2627|2662|2719|3036|3164|3340|3373|3491|3553|3569|3730|4091|4093|4915|5028|5138|5155|6347|6456|6622|6935|7044|7048|7049|7122|7123|7356|7538|8322|8425|8516|9314|9353|9365|9638|10266|23090|23767|25928|27063|55273|64399|79633|79652|79812|83891|91851|140628|152831|168667|255743	ACVRL1|AGTR2|ANXA3|BMP2|BMPR2|CAT|CAV1|CAV2|CDH5|CDKN2B|CTGF|CX3CR1|DAB2|DCN|EDN1|EGR1|EGR3|ENG|FGF2|FGFR2|FGFR4|FOS|GAB1|GAS6|GATA6|GDF10|GPC3|HAS1|NR4A1|NDST1|HYAL1|CYR61|IL1B|IL6|ANOS1|SMAD6|SMAD9|NTRK2|P2RY1|PDE2A|PDGFB|CCL2|SH3GL2|SNCA|ZEB1|LEFTY2|TGFBR2|TGFBR3|CLDN5|CLEC3B|SCGB1A1|ZFP36|FZD4|LTBP4|ITGA8|KLF4|SLIT2|KL|FEZ1|RAMP2|ZNF423|FLRT3|SOSTDC1|ANKRD1|TMEM100|HHIP|FAT4|TMEM204|MMRN2|SNX…
GO:0006887	2.5371e-09	1	89	851	exocytosis	BP	3.24854e-07	2|240|306|683|695|710|728|820|847|945|948|968|976|1511|1536|1675|2040|2157|2171|2207|2215|2219|2268|2277|2294|2352|2357|2358|2621|2624|3043|3055|3071|3101|3577|3579|4311|4332|4628|4973|5023|5155|5175|5196|5199|5473|5627|5787|5806|6283|6403|6414|6556|6590|6622|7044|7078|7123|7305|7450|8013|8676|8825|9535|9749|9912|10326|11025|11069|22915|22918|25840|29091|50487|56729|80223|80301|84106|84658|120892…	A2M|ALOX5|ANXA3|BST1|BTK|SERPING1|C5AR1|CAMP|CAT|CD33|CD36|CD68|ADGRE5|CTSG|CYBB|CFD|STOM|F8|FABP5|FCER1G|FCGR3B|FCN1|FGR|VEGFD|FOXF1|FOLR3|FPR1|FPR2|GAS6|GATA2|HBB|HCK|NCKAP1L|HK3|CXCR1|CXCR2|MME|MNDA|MYH10|OLR1|P2RX1|PDGFB|PECAM1|PF4|CFP|PPBP|PROS1|PTPRB|PTX3|S100A12|SELP|SELENOP|SLC11A1|SLPI|SNCA|LEFTY2|TIMP3|CLEC3B|TYROBP|VWF|NR4A3|STX11|LIN7A|GMFG|PHACTR2|ARHGAP44|SIRPB1|LILRB3|RAPGEF4|MMRN1…
GO:0002275	2.80203e-09	1	63	535	myeloid cell activation involved in immune response	BP	3.55835e-07	240|306|683|695|728|820|847|945|948|968|976|1511|1536|1675|2040|2171|2207|2215|2219|2268|2294|2352|2357|2358|2624|3043|3071|3101|3577|3579|4311|4332|4973|5023|5175|5199|5473|5581|5787|5806|6283|6556|6590|7305|8013|9535|10326|11025|22918|25840|50487|56729|80301|84106|84658|90865|126014|140885|150372|160364|199675|353189|100049587	ALOX5|ANXA3|BST1|BTK|C5AR1|CAMP|CAT|CD33|CD36|CD68|ADGRE5|CTSG|CYBB|CFD|STOM|FABP5|FCER1G|FCGR3B|FCN1|FGR|FOXF1|FOLR3|FPR1|FPR2|GATA2|HBB|NCKAP1L|HK3|CXCR1|CXCR2|MME|MNDA|OLR1|P2RX1|PECAM1|CFP|PPBP|PRKCE|PTPRB|PTX3|S100A12|SLC11A1|SLPI|TYROBP|NR4A3|GMFG|SIRPB1|LILRB3|CD93|METTL7A|PLA2G3|RETN|PLEKHO2|PRAM1|ADGRE3|IL33|OSCAR|SIRPA|NFAM1|CLEC12A|MCEMP1|SLCO4C1|SIGLEC14
GO:0043410	2.94629e-09	1	59	475	positive regulation of MAPK cascade	BP	3.71113e-07	154|177|246|284|408|650|728|858|948|1326|1490|1906|2247|2263|2264|2357|2549|2621|2690|2852|3084|3553|3569|4616|4915|5028|5155|5319|5320|5322|5581|6283|6347|6358|6368|6369|7010|7099|8322|8654|9365|9770|9839|10174|23328|23533|51196|65009|114898|120892|152007|152831|168667|255743|285016|338557|388121|388325|653361	ADRB2|AGER|ALOX15|ANGPT1|ARRB1|BMP2|C5AR1|CAV2|CD36|MAP3K8|CTGF|EDN1|FGF2|FGFR2|FGFR4|FPR1|GAB1|GAS6|GHR|GPER1|NRG1|IL1B|IL6|GADD45B|NTRK2|P2RY1|PDGFB|PLA2G1B|PLA2G2A|PLA2G5|PRKCE|S100A12|CCL2|CCL14|CCL23|CCL24|TEK|TLR4|FZD4|PDE5A|KL|RASSF2|ZEB2|SORBS3|SASH1|PIK3R5|PLCE1|NDRG4|C1QTNF2|LRRK2|GLIPR2|KLB|BMPER|NPNT|ALKAL2|FFAR4|TNFAIP8L3|SCIMP|NCF1
GO:0070374	3.49657e-09	1	31	181	positive regulation of ERK1 and ERK2 cascade	BP	4.36874e-07	246|284|408|650|728|948|1490|2247|2263|2264|2621|2852|3569|5028|5155|5320|5322|6347|6358|6368|6369|7010|7099|65009|152007|168667|255743|285016|338557|388121|388325	ALOX15|ANGPT1|ARRB1|BMP2|C5AR1|CD36|CTGF|FGF2|FGFR2|FGFR4|GAS6|GPER1|IL6|P2RY1|PDGFB|PLA2G2A|PLA2G5|CCL2|CCL14|CCL23|CCL24|TEK|TLR4|NDRG4|GLIPR2|BMPER|NPNT|ALKAL2|FFAR4|TNFAIP8L3|SCIMP
GO:0042327	4.6617e-09	1	94	926	positive regulation of phosphorylation	BP	5.745e-07	94|154|177|246|284|408|650|659|728|857|858|894|948|1326|1440|1490|1601|1636|1839|1906|1910|2013|2022|2247|2263|2264|2268|2357|2549|2621|2662|2690|2819|2852|3071|3084|3491|3553|3569|4616|4915|4921|5028|5155|5168|5319|5320|5322|5581|6283|6347|6358|6368|6369|6556|6622|6693|7010|7044|7048|7099|8322|8613|8654|8862|9021|9365|9770|9839|10174|23328|23533|23645|28984|51196|54959|55600|65009|89780|114898|1…	ACVRL1|ADRB2|AGER|ALOX15|ANGPT1|ARRB1|BMP2|BMPR2|C5AR1|CAV1|CAV2|CCND2|CD36|MAP3K8|CSF3|CTGF|DAB2|ACE|HBEGF|EDN1|EDNRB|EMP2|ENG|FGF2|FGFR2|FGFR4|FGR|FPR1|GAB1|GAS6|GDF10|GHR|GPD1|GPER1|NCKAP1L|NRG1|CYR61|IL1B|IL6|GADD45B|NTRK2|DDR2|P2RY1|PDGFB|ENPP2|PLA2G1B|PLA2G2A|PLA2G5|PRKCE|S100A12|CCL2|CCL14|CCL23|CCL24|SLC11A1|SNCA|SPN|TEK|LEFTY2|TGFBR2|TLR4|FZD4|PLPP3|PDE5A|APLN|SOCS3|KL|RASSF2|ZEB2|SORBS3…
GO:0043299	4.67224e-09	1	62	530	leukocyte degranulation	BP	5.745e-07	240|306|683|695|728|820|847|945|948|968|976|1511|1536|1675|2040|2171|2207|2215|2219|2268|2294|2352|2357|2358|2624|3043|3055|3071|3101|3577|3579|4311|4332|4973|5023|5175|5199|5473|5787|5806|6283|6556|6590|7305|8013|9535|10326|11025|22918|25840|50487|56729|80301|84106|84658|126014|140885|150372|160364|199675|353189|100049587	ALOX5|ANXA3|BST1|BTK|C5AR1|CAMP|CAT|CD33|CD36|CD68|ADGRE5|CTSG|CYBB|CFD|STOM|FABP5|FCER1G|FCGR3B|FCN1|FGR|FOXF1|FOLR3|FPR1|FPR2|GATA2|HBB|HCK|NCKAP1L|HK3|CXCR1|CXCR2|MME|MNDA|OLR1|P2RX1|PECAM1|CFP|PPBP|PTPRB|PTX3|S100A12|SLC11A1|SLPI|TYROBP|NR4A3|GMFG|SIRPB1|LILRB3|CD93|METTL7A|PLA2G3|RETN|PLEKHO2|PRAM1|ADGRE3|OSCAR|SIRPA|NFAM1|CLEC12A|MCEMP1|SLCO4C1|SIGLEC14
GO:0071621	4.79197e-09	1	22	108	granulocyte chemotaxis	BP	5.84582e-07	683|728|1906|2207|2920|2921|3071|3553|3579|5196|5319|5473|6283|6347|6358|6368|6369|9353|23604|57580|83700|120425	BST1|C5AR1|EDN1|FCER1G|CXCL2|CXCL3|NCKAP1L|IL1B|CXCR2|PF4|PLA2G1B|PPBP|S100A12|CCL2|CCL14|CCL23|CCL24|SLIT2|DAPK2|PREX1|JAM3|JAML
GO:0033002	5.00923e-09	1	31	166	muscle cell proliferation	BP	6.06313e-07	284|1012|1264|1839|1901|1906|2247|2263|2627|2697|2852|3569|4881|4883|4969|5155|5468|5739|5950|6909|6910|7048|7049|7128|8013|9314|10203|23493|56729|57447|65009	ANGPT1|CDH13|CNN1|HBEGF|S1PR1|EDN1|FGF2|FGFR2|GATA6|GJA1|GPER1|IL6|NPR1|NPR3|OGN|PDGFB|PPARG|PTGIR|RBP4|TBX2|TBX5|TGFBR2|TGFBR3|TNFAIP3|NR4A3|KLF4|CALCRL|HEY2|RETN|NDRG2|NDRG4
GO:0034097	5.92991e-09	1	83	814	response to cytokine	BP	7.08152e-07	246|284|361|554|695|857|1271|1440|1524|1634|1906|1958|2167|2294|2353|2532|2549|2621|2690|2819|2852|2920|2921|3055|3133|3373|3553|3563|3568|3569|3575|3577|3579|3727|3899|3953|3977|4311|4360|5138|5153|5155|5196|5322|5468|5473|5740|6347|6358|6368|6369|6387|6401|6404|6556|6586|6622|7128|7356|7538|8742|8809|8835|9021|9034|9173|9314|9353|10365|23767|25939|27063|27074|51208|51554|53832|53905|55022|64101…	ALOX15|ANGPT1|AQP4|AVPR2|BTK|CAV1|CNTFR|CSF3|CX3CR1|DCN|EDN1|EGR1|FABP4|FOXF1|FOS|ACKR1|GAB1|GAS6|GHR|GPD1|GPER1|CXCL2|CXCL3|HCK|HLA-E|HYAL1|IL1B|IL3RA|IL5RA|IL6|IL7R|CXCR1|CXCR2|JUND|AFF3|LEPR|LIFR|MME|MRC1|PDE2A|PDE1B|PDGFB|PF4|PLA2G5|PPARG|PPBP|PTGIS|CCL2|CCL14|CCL23|CCL24|CXCL12|SELE|SELPLG|SLC11A1|SLIT3|SNCA|TNFAIP3|SCGB1A1|ZFP36|TNFSF12|IL18R1|SOCS2|SOCS3|CCRL2|IL1RL1|KLF4|SLIT2|KLF2|FLRT3|…
GO:0002366	5.94202e-09	1	73	675	leukocyte activation involved in immune response	BP	7.08152e-07	240|306|683|695|728|820|847|945|948|968|976|1511|1536|1675|2040|2171|2207|2215|2219|2268|2294|2352|2357|2358|2624|3043|3071|3101|3142|3569|3577|3579|4242|4311|4332|4973|5023|5175|5199|5473|5581|5734|5787|5806|6283|6556|6590|7099|7305|8013|8809|9452|9535|10326|11025|22918|25840|26253|50487|51744|56729|80301|84106|84658|90865|126014|139818|140885|150372|160364|199675|353189|100049587	ALOX5|ANXA3|BST1|BTK|C5AR1|CAMP|CAT|CD33|CD36|CD68|ADGRE5|CTSG|CYBB|CFD|STOM|FABP5|FCER1G|FCGR3B|FCN1|FGR|FOXF1|FOLR3|FPR1|FPR2|GATA2|HBB|NCKAP1L|HK3|HLX|IL6|CXCR1|CXCR2|MFNG|MME|MNDA|OLR1|P2RX1|PECAM1|CFP|PPBP|PRKCE|PTGER4|PTPRB|PTX3|S100A12|SLC11A1|SLPI|TLR4|TYROBP|NR4A3|IL18R1|ITM2A|GMFG|SIRPB1|LILRB3|CD93|METTL7A|CLEC4E|PLA2G3|CD244|RETN|PLEKHO2|PRAM1|ADGRE3|IL33|OSCAR|DOCK11|SIRPA|NFAM1|CLEC…
GO:0002446	6.02956e-09	1	59	498	neutrophil mediated immunity	BP	7.13099e-07	240|306|683|728|820|847|945|948|968|976|1511|1536|1636|1675|2040|2171|2207|2215|2219|2268|2352|2357|2358|3043|3071|3101|3569|3577|3579|4311|4332|4973|5023|5175|5199|5319|5473|5787|5806|6283|6556|6590|7305|9535|10326|11025|22918|25840|56729|80301|84106|84658|126014|140885|150372|160364|199675|353189|100049587	ALOX5|ANXA3|BST1|C5AR1|CAMP|CAT|CD33|CD36|CD68|ADGRE5|CTSG|CYBB|ACE|CFD|STOM|FABP5|FCER1G|FCGR3B|FCN1|FGR|FOLR3|FPR1|FPR2|HBB|NCKAP1L|HK3|IL6|CXCR1|CXCR2|MME|MNDA|OLR1|P2RX1|PECAM1|CFP|PLA2G1B|PPBP|PTPRB|PTX3|S100A12|SLC11A1|SLPI|TYROBP|GMFG|SIRPB1|LILRB3|CD93|METTL7A|RETN|PLEKHO2|PRAM1|ADGRE3|OSCAR|SIRPA|NFAM1|CLEC12A|MCEMP1|SLCO4C1|SIGLEC14
GO:0002263	6.77772e-09	1	73	677	cell activation involved in immune response	BP	7.9551e-07	240|306|683|695|728|820|847|945|948|968|976|1511|1536|1675|2040|2171|2207|2215|2219|2268|2294|2352|2357|2358|2624|3043|3071|3101|3142|3569|3577|3579|4242|4311|4332|4973|5023|5175|5199|5473|5581|5734|5787|5806|6283|6556|6590|7099|7305|8013|8809|9452|9535|10326|11025|22918|25840|26253|50487|51744|56729|80301|84106|84658|90865|126014|139818|140885|150372|160364|199675|353189|100049587	ALOX5|ANXA3|BST1|BTK|C5AR1|CAMP|CAT|CD33|CD36|CD68|ADGRE5|CTSG|CYBB|CFD|STOM|FABP5|FCER1G|FCGR3B|FCN1|FGR|FOXF1|FOLR3|FPR1|FPR2|GATA2|HBB|NCKAP1L|HK3|HLX|IL6|CXCR1|CXCR2|MFNG|MME|MNDA|OLR1|P2RX1|PECAM1|CFP|PPBP|PRKCE|PTGER4|PTPRB|PTX3|S100A12|SLC11A1|SLPI|TLR4|TYROBP|NR4A3|IL18R1|ITM2A|GMFG|SIRPB1|LILRB3|CD93|METTL7A|CLEC4E|PLA2G3|CD244|RETN|PLEKHO2|PRAM1|ADGRE3|IL33|OSCAR|DOCK11|SIRPA|NFAM1|CLEC…
GO:0051246	7.45848e-09	1	203	2531	regulation of protein metabolic process	BP	8.68829e-07	2|94|104|154|177|185|186|246|284|322|358|408|467|554|650|659|683|710|728|729|730|732|857|858|894|948|1030|1285|1326|1359|1361|1410|1440|1473|1490|1511|1536|1601|1634|1636|1839|1843|1850|1906|1910|1958|2013|2022|2167|2192|2247|2263|2264|2268|2357|2549|2621|2624|2662|2690|2697|2719|2852|3071|3084|3491|3553|3569|3730|4091|4311|4616|4915|4921|5023|5028|5155|5168|5199|5319|5320|5322|5334|5414|5468|558…	A2M|ACVRL1|ADARB1|ADRB2|AGER|AGTR1|AGTR2|ALOX15|ANGPT1|APBB1|AQP1|ARRB1|ATF3|AVPR2|BMP2|BMPR2|BST1|SERPING1|C5AR1|C6|C7|C8B|CAV1|CAV2|CCND2|CD36|CDKN2B|COL4A3|MAP3K8|CPA3|CPB2|CRYAB|CSF3|CST5|CTGF|CTSG|CYBB|DAB2|DCN|ACE|HBEGF|DUSP1|DUSP8|EDN1|EDNRB|EGR1|EMP2|ENG|FABP4|FBLN1|FGF2|FGFR2|FGFR4|FGR|FPR1|GAB1|GAS6|GATA2|GDF10|GHR|GJA1|GPC3|GPER1|NCKAP1L|NRG1|CYR61|IL1B|IL6|ANOS1|SMAD6|MME|GADD45B|NTRK…
GO:0097530	8.07601e-09	1	23	118	granulocyte migration	BP	9.33743e-07	683|728|1906|2207|2920|2921|3071|3553|3579|5196|5319|5473|5734|6283|6347|6358|6368|6369|9353|23604|57580|83700|120425	BST1|C5AR1|EDN1|FCER1G|CXCL2|CXCL3|NCKAP1L|IL1B|CXCR2|PF4|PLA2G1B|PPBP|PTGER4|S100A12|CCL2|CCL14|CCL23|CCL24|SLIT2|DAPK2|PREX1|JAM3|JAML
GO:0001934	8.64136e-09	1	90	887	positive regulation of protein phosphorylation	BP	9.836e-07	94|154|177|246|284|408|650|659|728|857|858|894|948|1326|1440|1490|1601|1636|1839|1906|1910|2013|2022|2247|2263|2264|2357|2549|2621|2662|2690|2852|3071|3084|3491|3553|3569|4616|4915|4921|5028|5155|5168|5319|5320|5322|5581|6283|6347|6358|6368|6369|6556|6622|6693|7010|7044|7048|7099|8322|8613|8654|9021|9365|9770|9839|10174|23328|23533|23645|28984|51196|54959|55600|65009|89780|114898|120892|146433|15…	ACVRL1|ADRB2|AGER|ALOX15|ANGPT1|ARRB1|BMP2|BMPR2|C5AR1|CAV1|CAV2|CCND2|CD36|MAP3K8|CSF3|CTGF|DAB2|ACE|HBEGF|EDN1|EDNRB|EMP2|ENG|FGF2|FGFR2|FGFR4|FPR1|GAB1|GAS6|GDF10|GHR|GPER1|NCKAP1L|NRG1|CYR61|IL1B|IL6|GADD45B|NTRK2|DDR2|P2RY1|PDGFB|ENPP2|PLA2G1B|PLA2G2A|PLA2G5|PRKCE|S100A12|CCL2|CCL14|CCL23|CCL24|SLC11A1|SNCA|SPN|TEK|LEFTY2|TGFBR2|TLR4|FZD4|PLPP3|PDE5A|SOCS3|KL|RASSF2|ZEB2|SORBS3|SASH1|PIK3R5|…
GO:0010647	8.65921e-09	1	138	1556	positive regulation of cell communication	BP	9.836e-07	94|153|154|177|186|246|284|395|408|467|627|650|659|728|847|857|858|948|1012|1030|1326|1440|1490|1524|1601|1634|1839|1906|2013|2022|2159|2247|2263|2264|2268|2357|2549|2621|2627|2662|2690|2697|2702|2719|2828|2852|3084|3491|3553|3569|4242|4616|4900|4915|5028|5155|5196|5295|5319|5320|5322|5414|5581|5739|5740|5923|5950|6283|6347|6358|6368|6369|6403|6503|6622|7010|7044|7049|7078|7099|8322|8516|8654|874…	ACVRL1|ADRB1|ADRB2|AGER|AGTR2|ALOX15|ANGPT1|ARHGAP6|ARRB1|ATF3|BDNF|BMP2|BMPR2|C5AR1|CAT|CAV1|CAV2|CD36|CDH13|CDKN2B|MAP3K8|CSF3|CTGF|CX3CR1|DAB2|DCN|HBEGF|EDN1|EMP2|ENG|F10|FGF2|FGFR2|FGFR4|FGR|FPR1|GAB1|GAS6|GATA6|GDF10|GHR|GJA1|GJA5|GPC3|GPR4|GPER1|NRG1|CYR61|IL1B|IL6|MFNG|GADD45B|NRGN|NTRK2|P2RY1|PDGFB|PF4|PIK3R1|PLA2G1B|PLA2G2A|PLA2G5|SEPT4|PRKCE|PTGIR|PTGIS|RASGRF1|RBP4|S100A12|CCL2|CCL14|C…
GO:0007596	8.69768e-09	1	47	348	blood coagulation	BP	9.836e-07	2|408|710|857|947|948|1361|1906|2157|2159|2160|2192|2207|2621|2624|2627|3043|3569|5023|5028|5155|5196|5295|5581|5588|5592|5627|6403|7056|7099|7450|9002|9060|10398|10630|11234|22915|23533|23764|30846|80274|84959|89780|139818|140628|286133|653145	A2M|ARRB1|SERPING1|CAV1|CD34|CD36|CPB2|EDN1|F8|F10|F11|FBLN1|FCER1G|GAS6|GATA2|GATA6|HBB|IL6|P2RX1|P2RY1|PDGFB|PF4|PIK3R1|PRKCE|PRKCQ|PRKG1|PROS1|SELP|THBD|TLR4|VWF|F2RL3|PAPSS2|MYL9|PDPN|HPS5|MMRN1|PIK3R5|MAFF|EHD2|SCUBE1|UBASH3B|WNT3A|DOCK11|GATA5|SCARA5|ANXA8
GO:0009967	8.99458e-09	1	129	1427	positive regulation of signal transduction	BP	1.0098e-06	94|153|154|177|186|246|284|395|408|467|627|650|659|728|847|857|858|948|1012|1030|1326|1440|1490|1601|1634|1839|1906|2013|2022|2159|2247|2263|2264|2268|2357|2549|2621|2627|2662|2690|2697|2719|2828|2852|3084|3491|3553|3569|4242|4616|4915|5028|5155|5196|5295|5319|5320|5322|5414|5581|5739|5740|5923|6283|6347|6358|6368|6369|6403|6503|7010|7044|7049|7078|7099|8322|8516|8654|8742|8809|8835|9002|9021|903…	ACVRL1|ADRB1|ADRB2|AGER|AGTR2|ALOX15|ANGPT1|ARHGAP6|ARRB1|ATF3|BDNF|BMP2|BMPR2|C5AR1|CAT|CAV1|CAV2|CD36|CDH13|CDKN2B|MAP3K8|CSF3|CTGF|DAB2|DCN|HBEGF|EDN1|EMP2|ENG|F10|FGF2|FGFR2|FGFR4|FGR|FPR1|GAB1|GAS6|GATA6|GDF10|GHR|GJA1|GPC3|GPR4|GPER1|NRG1|CYR61|IL1B|IL6|MFNG|GADD45B|NTRK2|P2RY1|PDGFB|PF4|PIK3R1|PLA2G1B|PLA2G2A|PLA2G5|SEPT4|PRKCE|PTGIR|PTGIS|RASGRF1|S100A12|CCL2|CCL14|CCL23|CCL24|SELP|SLA|TE…
GO:0008217	9.43121e-09	1	30	168	regulation of blood pressure	BP	1.05121e-06	94|153|154|185|186|477|554|659|947|1268|1359|1511|1636|1906|1910|2013|2621|2697|2702|3043|4311|4881|4883|5023|5155|5468|5800|6446|8862|10266	ACVRL1|ADRB1|ADRB2|AGTR1|AGTR2|ATP1A2|AVPR2|BMPR2|CD34|CNR1|CPA3|CTSG|ACE|EDN1|EDNRB|EMP2|GAS6|GJA1|GJA5|HBB|MME|NPR1|NPR3|P2RX1|PDGFB|PPARG|PTPRO|SGK1|APLN|RAMP2
GO:0016310	9.6077e-09	1	183	2208	phosphorylation	BP	1.06323e-06	94|104|154|177|203|246|284|408|467|650|659|660|683|695|728|857|858|894|948|1030|1326|1410|1440|1490|1511|1601|1634|1636|1839|1843|1850|1906|1910|2013|2022|2078|2167|2192|2202|2203|2247|2263|2264|2268|2357|2549|2621|2662|2674|2690|2819|2852|2869|3055|3071|3084|3101|3340|3491|3553|3563|3568|3569|4091|4093|4616|4638|4881|4915|4919|4921|5028|5155|5166|5168|5295|5319|5320|5322|5334|5581|5588|5593|5596…	ACVRL1|ADARB1|ADRB2|AGER|AK1|ALOX15|ANGPT1|ARRB1|ATF3|BMP2|BMPR2|BMX|BST1|BTK|C5AR1|CAV1|CAV2|CCND2|CD36|CDKN2B|MAP3K8|CRYAB|CSF3|CTGF|CTSG|DAB2|DCN|ACE|HBEGF|DUSP1|DUSP8|EDN1|EDNRB|EMP2|ENG|ERG|FABP4|FBLN1|EFEMP1|FBP1|FGF2|FGFR2|FGFR4|FGR|FPR1|GAB1|GAS6|GDF10|GFRA1|GHR|GPD1|GPER1|GRK5|HCK|NCKAP1L|NRG1|HK3|NDST1|CYR61|IL1B|IL3RA|IL5RA|IL6|SMAD6|SMAD9|GADD45B|MYLK|NPR1|NTRK2|ROR1|DDR2|P2RY1|PDGFB|…
GO:0051336	1.02411e-08	1	125	1358	regulation of hydrolase activity	BP	1.12529e-06	2|153|185|186|216|284|341|358|395|408|482|650|710|728|857|858|1285|1473|1490|1839|1901|2192|2247|2263|2264|2621|2674|2719|2852|3071|3084|3491|3563|3568|3569|3730|3953|4915|5023|5155|5319|5322|5468|5581|5592|5627|5739|5806|5923|6347|6358|6368|6369|6401|6590|6622|6711|7010|7078|7134|8434|8698|8787|9314|9353|9365|9411|9459|9647|9732|9754|9806|9912|10044|10316|10395|11069|11080|22898|22899|23645|2608…	A2M|ADRB1|AGTR1|AGTR2|ALDH1A1|ANGPT1|APOC1|AQP1|ARHGAP6|ARRB1|ATP1B2|BMP2|SERPING1|C5AR1|CAV1|CAV2|COL4A3|CST5|CTGF|HBEGF|S1PR1|FBLN1|FGF2|FGFR2|FGFR4|GAS6|GFRA1|GPC3|GPER1|NCKAP1L|NRG1|CYR61|IL3RA|IL5RA|IL6|ANOS1|LEPR|NTRK2|P2RX1|PDGFB|PLA2G1B|PLA2G5|PPARG|PRKCE|PRKG1|PROS1|PTGIR|PTX3|RASGRF1|CCL2|CCL14|CCL23|CCL24|SELE|SLPI|SNCA|SPTBN1|TEK|TIMP3|TNNC1|RECK|S1PR4|RGS9|KLF4|SLIT2|KL|ARHGAP29|ARHG…
GO:0048519	1.12613e-08	1	342	4774	negative regulation of biological process	BP	1.22867e-06	2|32|33|94|104|153|154|177|186|246|284|322|341|358|395|408|467|477|554|590|597|627|650|659|687|695|710|714|728|820|845|847|857|858|894|945|947|948|1003|1012|1030|1264|1268|1271|1285|1361|1410|1440|1473|1490|1511|1524|1601|1602|1634|1636|1805|1839|1843|1850|1901|1906|1910|1958|1960|2022|2160|2167|2192|2202|2203|2207|2219|2247|2263|2273|2294|2354|2615|2621|2624|2627|2662|2697|2702|2719|2824|2828|28…	A2M|ACACB|ACADL|ACVRL1|ADARB1|ADRB1|ADRB2|AGER|AGTR2|ALOX15|ANGPT1|APBB1|APOC1|AQP1|ARHGAP6|ARRB1|ATF3|ATP1A2|AVPR2|BCHE|BCL2A1|BDNF|BMP2|BMPR2|KLF9|BTK|SERPING1|C1QC|C5AR1|CAMP|CASQ2|CAT|CAV1|CAV2|CCND2|CD33|CD34|CD36|CDH5|CDH13|CDKN2B|CNN1|CNR1|CNTFR|COL4A3|CPB2|CRYAB|CSF3|CST5|CTGF|CTSG|CX3CR1|DAB2|DACH1|DCN|ACE|DPT|HBEGF|DUSP1|DUSP8|S1PR1|EDN1|EDNRB|EGR1|EGR3|ENG|F11|FABP4|FBLN1|EFEMP1|FBP1|F…
GO:0008284	1.14837e-08	1	85	834	positive regulation of cell proliferation	BP	1.24417e-06	94|177|186|358|467|554|650|659|683|728|858|894|1012|1271|1440|1490|1524|1839|1901|1906|1910|1958|1960|2013|2247|2263|2264|2277|2294|2621|2627|2852|2869|3055|3071|3084|3133|3142|3164|3373|3400|3491|3553|3569|3579|3977|4915|4921|5155|5319|5588|5737|5745|6347|6358|6369|6387|6693|6909|6910|6926|7010|7048|7049|7051|7099|7128|7433|8013|8742|8862|9037|10203|10763|23493|29950|51744|54959|55022|56729|6475…	ACVRL1|AGER|AGTR2|AQP1|ATF3|AVPR2|BMP2|BMPR2|BST1|C5AR1|CAV2|CCND2|CDH13|CNTFR|CSF3|CTGF|CX3CR1|HBEGF|S1PR1|EDN1|EDNRB|EGR1|EGR3|EMP2|FGF2|FGFR2|FGFR4|VEGFD|FOXF1|GAS6|GATA6|GPER1|GRK5|HCK|NCKAP1L|NRG1|HLA-E|HLX|NR4A1|HYAL1|ID4|CYR61|IL1B|IL6|CXCR2|LIFR|NTRK2|DDR2|PDGFB|PLA2G1B|PRKCQ|PTGFR|PTH1R|CCL2|CCL14|CCL24|CXCL12|SPN|TBX2|TBX5|TBX3|TEK|TGFBR2|TGFBR3|TGM1|TLR4|TNFAIP3|VIPR1|NR4A3|TNFSF12|APL…
GO:0007507	1.17827e-08	1	62	499	heart development	BP	1.2622e-06	32|94|186|187|650|659|1901|1906|2022|2078|2247|2263|2294|2549|2627|2697|2702|2719|2852|3084|3340|3491|4091|4628|4629|5155|5468|5950|6445|6909|6910|6926|7010|7048|7049|7122|7134|7881|9510|10203|10266|10395|10529|23493|23767|27063|51196|54345|55130|55273|57158|57493|64321|65009|79633|80274|89780|91624|92749|140706|144165|200894	ACACB|ACVRL1|AGTR2|APLNR|BMP2|BMPR2|S1PR1|EDN1|ENG|ERG|FGF2|FGFR2|FOXF1|GAB1|GATA6|GJA1|GJA5|GPC3|GPER1|NRG1|NDST1|CYR61|SMAD6|MYH10|MYH11|PDGFB|PPARG|RBP4|SGCG|TBX2|TBX5|TBX3|TEK|TGFBR2|TGFBR3|CLDN5|TNNC1|KCNAB1|ADAMTS1|CALCRL|RAMP2|DLC1|NEBL|HEY2|FLRT3|ANKRD1|PLCE1|SOX18|ARMC4|TMEM100|JPH2|HEG1|SOX17|NDRG4|FAT4|SCUBE1|WNT3A|NEXN|DRC1|CCM2L|PRICKLE1|ARL13B
GO:0023014	1.18166e-08	1	91	896	signal transduction by protein phosphorylation	BP	1.2622e-06	94|154|177|246|284|408|467|650|659|728|857|858|948|1326|1410|1490|1839|1843|1850|1906|2192|2247|2263|2264|2357|2549|2621|2662|2674|2690|2852|3084|3340|3491|3553|3563|3568|3569|4616|4915|5028|5155|5319|5320|5322|5581|5596|5734|5923|6237|6283|6347|6358|6368|6369|6711|7010|7044|7048|7078|7099|7538|8322|8654|9314|9365|9459|9770|9839|10044|10174|23328|23533|51196|53358|57447|65009|80122|85358|114898|1…	ACVRL1|ADRB2|AGER|ALOX15|ANGPT1|ARRB1|ATF3|BMP2|BMPR2|C5AR1|CAV1|CAV2|CD36|MAP3K8|CRYAB|CTGF|HBEGF|DUSP1|DUSP8|EDN1|FBLN1|FGF2|FGFR2|FGFR4|FPR1|GAB1|GAS6|GDF10|GFRA1|GHR|GPER1|NRG1|NDST1|CYR61|IL1B|IL3RA|IL5RA|IL6|GADD45B|NTRK2|P2RY1|PDGFB|PLA2G1B|PLA2G2A|PLA2G5|PRKCE|MAPK4|PTGER4|RASGRF1|RRAS|S100A12|CCL2|CCL14|CCL23|CCL24|SPTBN1|TEK|LEFTY2|TGFBR2|TIMP3|TLR4|ZFP36|FZD4|PDE5A|KLF4|KL|ARHGEF6|RASS…
GO:0071363	1.19501e-08	1	71	619	cellular response to growth factor stimulus	BP	1.2622e-06	94|186|650|659|847|857|858|1003|1030|1490|1524|1601|1634|1906|1958|1960|2022|2247|2263|2264|2353|2621|2627|2662|2719|3036|3164|3340|3373|3491|3553|3569|3730|4091|4093|4915|5138|5155|6347|6456|6622|6935|7044|7048|7049|7122|7123|7538|8322|8425|8516|9314|9353|9365|9638|10266|23090|23767|25928|27063|55273|64399|79633|79652|79812|83891|91851|140628|152831|168667|255743	ACVRL1|AGTR2|BMP2|BMPR2|CAT|CAV1|CAV2|CDH5|CDKN2B|CTGF|CX3CR1|DAB2|DCN|EDN1|EGR1|EGR3|ENG|FGF2|FGFR2|FGFR4|FOS|GAS6|GATA6|GDF10|GPC3|HAS1|NR4A1|NDST1|HYAL1|CYR61|IL1B|IL6|ANOS1|SMAD6|SMAD9|NTRK2|PDE2A|PDGFB|CCL2|SH3GL2|SNCA|ZEB1|LEFTY2|TGFBR2|TGFBR3|CLDN5|CLEC3B|ZFP36|FZD4|LTBP4|ITGA8|KLF4|SLIT2|KL|FEZ1|RAMP2|ZNF423|FLRT3|SOSTDC1|ANKRD1|TMEM100|HHIP|FAT4|TMEM204|MMRN2|SNX25|CHRDL1|GATA5|KLB|BMPER…
GO:0023056	1.1976e-08	1	138	1564	positive regulation of signaling	BP	1.2622e-06	94|153|154|177|186|246|284|395|408|467|627|650|659|728|847|857|858|948|1012|1030|1326|1440|1490|1524|1601|1634|1839|1906|2013|2022|2159|2247|2263|2264|2268|2357|2549|2621|2627|2662|2690|2697|2719|2828|2852|3084|3491|3553|3569|4242|4616|4900|4915|5028|5155|5196|5295|5319|5320|5322|5414|5581|5739|5740|5923|5950|6283|6347|6358|6368|6369|6403|6503|6622|7010|7044|7049|7078|7099|8322|8516|8654|8742|880…	ACVRL1|ADRB1|ADRB2|AGER|AGTR2|ALOX15|ANGPT1|ARHGAP6|ARRB1|ATF3|BDNF|BMP2|BMPR2|C5AR1|CAT|CAV1|CAV2|CD36|CDH13|CDKN2B|MAP3K8|CSF3|CTGF|CX3CR1|DAB2|DCN|HBEGF|EDN1|EMP2|ENG|F10|FGF2|FGFR2|FGFR4|FGR|FPR1|GAB1|GAS6|GATA6|GDF10|GHR|GJA1|GPC3|GPR4|GPER1|NRG1|CYR61|IL1B|IL6|MFNG|GADD45B|NRGN|NTRK2|P2RY1|PDGFB|PF4|PIK3R1|PLA2G1B|PLA2G2A|PLA2G5|SEPT4|PRKCE|PTGIR|PTGIS|RASGRF1|RBP4|S100A12|CCL2|CCL14|CCL23|…
GO:0009888	1.21083e-08	1	158	1868	tissue development	BP	1.26753e-06	94|104|154|186|246|467|650|659|660|695|847|857|858|947|1003|1073|1490|1601|1634|1839|1843|1901|1906|1910|1958|1959|2012|2022|2078|2171|2202|2247|2263|2294|2353|2549|2621|2627|2697|2701|2702|2719|2824|2828|3055|3084|3142|3202|3373|3400|3491|3553|3569|3851|4091|4093|4222|4223|4628|4629|4638|4855|4919|4921|5138|5155|5175|5251|5468|5740|5745|5800|5948|5950|6092|6442|6445|6886|6909|6910|6926|6935|6943…	ACVRL1|ADARB1|ADRB2|AGTR2|ALOX15|ATF3|BMP2|BMPR2|BMX|BTK|CAT|CAV1|CAV2|CD34|CDH5|CFL2|CTGF|DAB2|DCN|HBEGF|DUSP1|S1PR1|EDN1|EDNRB|EGR1|EGR2|EMP1|ENG|ERG|FABP5|EFEMP1|FGF2|FGFR2|FOXF1|FOS|GAB1|GAS6|GATA6|GJA1|GJA4|GJA5|GPC3|GPM6B|GPR4|HCK|NRG1|HLX|HOXA5|HYAL1|ID4|CYR61|IL1B|IL6|KRT4|SMAD6|SMAD9|MEOX1|MEOX2|MYH10|MYH11|MYLK|NOTCH4|ROR1|DDR2|PDE2A|PDGFB|PECAM1|PHEX|PPARG|PTGIS|PTH1R|PTPRO|RBP2|RBP4|R…
GO:0050817	1.25008e-08	1	47	352	coagulation	BP	1.29983e-06	2|408|710|857|947|948|1361|1906|2157|2159|2160|2192|2207|2621|2624|2627|3043|3569|5023|5028|5155|5196|5295|5581|5588|5592|5627|6403|7056|7099|7450|9002|9060|10398|10630|11234|22915|23533|23764|30846|80274|84959|89780|139818|140628|286133|653145	A2M|ARRB1|SERPING1|CAV1|CD34|CD36|CPB2|EDN1|F8|F10|F11|FBLN1|FCER1G|GAS6|GATA2|GATA6|HBB|IL6|P2RX1|P2RY1|PDGFB|PF4|PIK3R1|PRKCE|PRKCQ|PRKG1|PROS1|SELP|THBD|TLR4|VWF|F2RL3|PAPSS2|MYL9|PDPN|HPS5|MMRN1|PIK3R5|MAFF|EHD2|SCUBE1|UBASH3B|WNT3A|DOCK11|GATA5|SCARA5|ANXA8
GO:0006950	1.37537e-08	1	270	3664	response to stress	BP	1.42058e-06	2|94|104|153|154|177|185|186|240|246|306|322|358|361|366|408|467|650|659|660|667|683|695|710|712|713|714|728|729|730|732|761|820|847|857|947|948|976|1036|1268|1326|1361|1410|1490|1511|1524|1536|1634|1675|1839|1843|1906|1910|1958|2034|2157|2159|2160|2167|2171|2192|2206|2207|2219|2247|2268|2277|2294|2353|2357|2358|2532|2549|2621|2624|2627|2697|2701|2828|2852|2878|2920|2921|3039|3040|3043|3055|3084|…	A2M|ACVRL1|ADARB1|ADRB1|ADRB2|AGER|AGTR1|AGTR2|ALOX5|ALOX15|ANXA3|APBB1|AQP1|AQP4|AQP9|ARRB1|ATF3|BMP2|BMPR2|BMX|DST|BST1|BTK|SERPING1|C1QA|C1QB|C1QC|C5AR1|C6|C7|C8B|CA3|CAMP|CAT|CAV1|CD34|CD36|ADGRE5|CDO1|CNR1|MAP3K8|CPB2|CRYAB|CTGF|CTSG|CX3CR1|CYBB|DCN|CFD|HBEGF|DUSP1|EDN1|EDNRB|EGR1|EPAS1|F8|F10|F11|FABP4|FABP5|FBLN1|MS4A2|FCER1G|FCN1|FGF2|FGR|VEGFD|FOXF1|FOS|FPR1|FPR2|ACKR1|GAB1|GAS6|GATA2|GA…
GO:0045766	1.4051e-08	1	25	122	positive regulation of angiogenesis	BP	1.44167e-06	94|306|358|728|729|947|1524|1536|2022|2247|2277|2624|2627|3373|3553|5740|6237|6369|7010|7048|8742|9037|10266|23328|126393	ACVRL1|ANXA3|AQP1|C5AR1|C6|CD34|CX3CR1|CYBB|ENG|FGF2|VEGFD|GATA2|GATA6|HYAL1|IL1B|PTGIS|RRAS|CCL24|TEK|TGFBR2|TNFSF12|SEMA5A|RAMP2|SASH1|HSPB6
GO:0007517	1.53793e-08	1	48	353	muscle organ development	BP	1.56545e-06	104|467|650|857|858|1073|1271|1634|1839|1901|1906|1958|1959|1960|2022|2115|2247|2263|2273|2353|2627|2697|3084|3142|3569|4223|4638|5950|6442|6445|6909|6910|6943|7048|7049|7134|7402|7832|7881|22808|23493|23764|27063|57158|57493|64321|89780|140706	ADARB1|ATF3|BMP2|CAV1|CAV2|CFL2|CNTFR|DCN|HBEGF|S1PR1|EDN1|EGR1|EGR2|EGR3|ENG|ETV1|FGF2|FGFR2|FHL1|FOS|GATA6|GJA1|NRG1|HLX|IL6|MEOX2|MYLK|RBP4|SGCA|SGCG|TBX2|TBX5|TCF21|TGFBR2|TGFBR3|TNNC1|UTRN|BTG2|KCNAB1|MRAS|HEY2|MAFF|ANKRD1|JPH2|HEG1|SOX17|WNT3A|CCM2L
GO:0002252	1.54595e-08	1	108	1169	immune effector process	BP	1.56545e-06	2|104|177|240|284|306|683|695|710|712|713|714|728|729|730|732|820|847|945|948|968|976|1178|1511|1536|1636|1675|2013|2040|2171|2207|2214|2215|2219|2268|2294|2352|2357|2358|2624|3043|3055|3071|3101|3133|3142|3553|3569|3575|3577|3579|4242|4311|4332|4973|5023|5175|5199|5295|5319|5473|5551|5581|5627|5734|5787|5806|5950|6283|6347|6556|6590|6693|7099|7128|7305|8013|8547|8809|9452|9535|10326|11025|11326|…	A2M|ADARB1|AGER|ALOX5|ANGPT1|ANXA3|BST1|BTK|SERPING1|C1QA|C1QB|C1QC|C5AR1|C6|C7|C8B|CAMP|CAT|CD33|CD36|CD68|ADGRE5|CLC|CTSG|CYBB|ACE|CFD|EMP2|STOM|FABP5|FCER1G|FCGR3A|FCGR3B|FCN1|FGR|FOXF1|FOLR3|FPR1|FPR2|GATA2|HBB|HCK|NCKAP1L|HK3|HLA-E|HLX|IL1B|IL6|IL7R|CXCR1|CXCR2|MFNG|MME|MNDA|OLR1|P2RX1|PECAM1|CFP|PIK3R1|PLA2G1B|PPBP|PRF1|PRKCE|PROS1|PTGER4|PTPRB|PTX3|RBP4|S100A12|CCL2|SLC11A1|SLPI|SPN|TLR4|T…
GO:0048523	1.66116e-08	1	315	4321	negative regulation of cellular process	BP	1.67119e-06	2|32|33|94|104|154|177|186|284|322|341|358|395|408|467|477|590|597|627|650|659|687|695|710|714|728|845|847|857|858|894|945|947|948|1003|1012|1030|1264|1268|1271|1285|1361|1410|1440|1473|1490|1524|1601|1602|1634|1636|1805|1839|1843|1850|1901|1906|1910|1958|1960|2022|2167|2192|2202|2203|2207|2219|2247|2263|2273|2294|2354|2615|2621|2624|2627|2662|2697|2719|2852|2869|2890|3036|3055|3071|3084|3142|316…	A2M|ACACB|ACADL|ACVRL1|ADARB1|ADRB2|AGER|AGTR2|ANGPT1|APBB1|APOC1|AQP1|ARHGAP6|ARRB1|ATF3|ATP1A2|BCHE|BCL2A1|BDNF|BMP2|BMPR2|KLF9|BTK|SERPING1|C1QC|C5AR1|CASQ2|CAT|CAV1|CAV2|CCND2|CD33|CD34|CD36|CDH5|CDH13|CDKN2B|CNN1|CNR1|CNTFR|COL4A3|CPB2|CRYAB|CSF3|CST5|CTGF|CX3CR1|DAB2|DACH1|DCN|ACE|DPT|HBEGF|DUSP1|DUSP8|S1PR1|EDN1|EDNRB|EGR1|EGR3|ENG|FABP4|FBLN1|EFEMP1|FBP1|FCER1G|FCN1|FGF2|FGFR2|FHL1|FOXF1|…
GO:0045446	1.68796e-08	1	22	93	endothelial cell differentiation	BP	1.68719e-06	94|659|1003|1901|2022|3084|3553|4855|5138|6935|7122|23493|26084|54345|55273|57493|64321|80274|81575|84913|91663|168667	ACVRL1|BMPR2|CDH5|S1PR1|ENG|NRG1|IL1B|NOTCH4|PDE2A|ZEB1|CLDN5|HEY2|ARHGEF26|SOX18|TMEM100|HEG1|SOX17|SCUBE1|APOLD1|ATOH8|MYADM|BMPER
GO:0033993	1.94018e-08	1	88	874	response to lipid	BP	1.92688e-06	21|186|306|358|477|590|687|728|847|857|948|1036|1268|1410|1440|1490|1511|1524|1536|1601|1634|1843|1906|1910|2022|2353|2354|2624|2697|2852|2920|2921|3055|3164|3553|3569|3727|3949|4129|4360|5166|5196|5251|5468|5473|5581|5734|5737|5739|5950|6258|6347|6401|6403|6532|6556|6586|6590|6622|6751|6943|7048|7049|7056|7075|7099|7128|7356|7538|8013|8322|8835|9314|9353|9450|9619|10266|10268|23328|25959|27063|5…	ABCA3|AGTR2|ANXA3|AQP1|ATP1A2|BCHE|KLF9|C5AR1|CAT|CAV1|CD36|CDO1|CNR1|CRYAB|CSF3|CTGF|CTSG|CX3CR1|CYBB|DAB2|DCN|DUSP1|EDN1|EDNRB|ENG|FOS|FOSB|GATA2|GJA1|GPER1|CXCL2|CXCL3|HCK|NR4A1|IL1B|IL6|JUND|LDLR|MAOB|MRC1|PDK4|PF4|PHEX|PPARG|PPBP|PRKCE|PTGER4|PTGFR|PTGIR|RBP4|RXRG|CCL2|SELE|SELP|SLC6A4|SLC11A1|SLIT3|SLPI|SNCA|SSTR1|TCF21|TGFBR2|TGFBR3|THBD|TIE1|TLR4|TNFAIP3|SCGB1A1|ZFP36|NR4A3|FZD4|SOCS2|KLF…
GO:0072001	1.96492e-08	1	42	280	renal system development	BP	1.93901e-06	185|186|284|650|847|947|1285|1634|1636|1958|2247|2263|2294|2719|2828|4091|4093|4311|5155|5175|5800|5950|6092|6943|7010|7466|7704|8516|9353|9510|23371|28999|51196|51301|64321|79192|79633|80144|120892|168667|255738|255743	AGTR1|AGTR2|ANGPT1|BMP2|CAT|CD34|COL4A3|DCN|ACE|EGR1|FGF2|FGFR2|FOXF1|GPC3|GPR4|SMAD6|SMAD9|MME|PDGFB|PECAM1|PTPRO|RBP4|ROBO2|TCF21|TEK|WFS1|ZBTB16|ITGA8|SLIT2|ADAMTS1|TNS2|KLF15|PLCE1|GCNT4|SOX17|IRX1|FAT4|FRAS1|LRRK2|BMPER|PCSK9|NPNT
GO:0040017	2.10343e-08	1	54	438	positive regulation of locomotion	BP	2.06256e-06	177|284|306|650|659|728|858|1012|1601|1839|1901|1906|2159|2247|2268|2277|2294|2621|2852|2920|2921|3071|3373|3491|3569|4638|4921|5155|5168|5196|5295|5473|5581|6347|6369|6387|6403|7010|7048|8613|9037|9353|9647|9732|9806|23328|23604|56729|57580|80031|84913|91663|152007|154810	AGER|ANGPT1|ANXA3|BMP2|BMPR2|C5AR1|CAV2|CDH13|DAB2|HBEGF|S1PR1|EDN1|F10|FGF2|FGR|VEGFD|FOXF1|GAS6|GPER1|CXCL2|CXCL3|NCKAP1L|HYAL1|CYR61|IL6|MYLK|DDR2|PDGFB|ENPP2|PF4|PIK3R1|PPBP|PRKCE|CCL2|CCL24|CXCL12|SELP|TEK|TGFBR2|PLPP3|SEMA5A|SLIT2|PPM1F|DOCK4|SPOCK2|SASH1|DAPK2|RETN|PREX1|SEMA6D|ATOH8|MYADM|GLIPR2|AMOTL1
GO:0042119	2.12932e-08	1	57	490	neutrophil activation	BP	2.07482e-06	240|306|683|728|820|847|945|948|968|976|1511|1536|1675|2040|2171|2207|2215|2219|2268|2352|2357|2358|3043|3071|3101|3577|3579|4311|4332|4973|5023|5175|5199|5473|5787|5806|6283|6556|6590|7305|9535|10326|11025|22918|25840|56729|57580|80301|84106|84658|126014|140885|150372|160364|199675|353189|100049587	ALOX5|ANXA3|BST1|C5AR1|CAMP|CAT|CD33|CD36|CD68|ADGRE5|CTSG|CYBB|CFD|STOM|FABP5|FCER1G|FCGR3B|FCN1|FGR|FOLR3|FPR1|FPR2|HBB|NCKAP1L|HK3|CXCR1|CXCR2|MME|MNDA|OLR1|P2RX1|PECAM1|CFP|PPBP|PTPRB|PTX3|S100A12|SLC11A1|SLPI|TYROBP|GMFG|SIRPB1|LILRB3|CD93|METTL7A|RETN|PREX1|PLEKHO2|PRAM1|ADGRE3|OSCAR|SIRPA|NFAM1|CLEC12A|MCEMP1|SLCO4C1|SIGLEC14
GO:0001570	2.22411e-08	1	19	72	vasculogenesis	BP	2.15363e-06	857|947|2013|2022|2294|4915|6910|7048|7049|7075|8322|9444|10266|23493|54345|54922|55273|57493|64321	CAV1|CD34|EMP2|ENG|FOXF1|NTRK2|TBX5|TGFBR2|TGFBR3|TIE1|FZD4|QKI|RAMP2|HEY2|SOX18|RASIP1|TMEM100|HEG1|SOX17
GO:0000165	2.24766e-08	1	87	860	MAPK cascade	BP	2.16292e-06	154|177|246|284|408|467|650|728|857|858|948|1326|1410|1490|1839|1843|1850|1906|2192|2247|2263|2264|2357|2549|2621|2662|2674|2690|2852|3084|3340|3491|3553|3563|3568|3569|4616|4915|5028|5155|5319|5320|5322|5581|5596|5734|5923|6237|6283|6347|6358|6368|6369|6711|7010|7044|7078|7099|7538|8322|8654|9314|9365|9459|9770|9839|10044|10174|23328|23533|51196|53358|57447|65009|85358|114898|115727|120892|15200…	ADRB2|AGER|ALOX15|ANGPT1|ARRB1|ATF3|BMP2|C5AR1|CAV1|CAV2|CD36|MAP3K8|CRYAB|CTGF|HBEGF|DUSP1|DUSP8|EDN1|FBLN1|FGF2|FGFR2|FGFR4|FPR1|GAB1|GAS6|GDF10|GFRA1|GHR|GPER1|NRG1|NDST1|CYR61|IL1B|IL3RA|IL5RA|IL6|GADD45B|NTRK2|P2RY1|PDGFB|PLA2G1B|PLA2G2A|PLA2G5|PRKCE|MAPK4|PTGER4|RASGRF1|RRAS|S100A12|CCL2|CCL14|CCL23|CCL24|SPTBN1|TEK|LEFTY2|TIMP3|TLR4|ZFP36|FZD4|PDE5A|KLF4|KL|ARHGEF6|RASSF2|ZEB2|SH2D3C|SORBS…
GO:0032989	2.41812e-08	1	101	991	cellular component morphogenesis	BP	2.31259e-06	104|322|627|659|845|1073|1808|1906|1959|2115|2192|2263|2268|2549|2674|2697|2823|3055|3084|3569|3575|3730|3988|4628|4629|4855|4915|4969|4974|5168|5295|5588|5789|5800|5990|6092|6347|6369|6383|6387|6446|6456|6586|6711|6886|7010|7111|7940|8013|8322|8516|8994|9037|9046|9353|9638|9839|9912|10129|10319|10365|10395|10529|10630|10763|10810|22854|23237|23767|26084|26524|27063|50487|51092|51393|53358|54873|…	ADARB1|APBB1|BDNF|BMPR2|CASQ2|CFL2|DPYSL2|EDN1|EGR2|ETV1|FBLN1|FGFR2|FGR|GAB1|GFRA1|GJA1|GPM6A|HCK|NRG1|IL6|IL7R|ANOS1|LIPA|MYH10|MYH11|NOTCH4|NTRK2|OGN|OMG|ENPP2|PIK3R1|PRKCQ|PTPRD|PTPRO|RFX2|ROBO2|CCL2|CCL24|SDC2|CXCL12|SGK1|SH3GL2|SLIT3|SPTBN1|TAL1|TEK|TMOD1|LST1|NR4A3|FZD4|ITGA8|LIMD1|SEMA5A|DOK2|SLIT2|FEZ1|ZEB2|ARHGAP44|FRY|LAMC3|KLF2|DLC1|NEBL|PDPN|NES|WASF3|NTNG1|ARC|FLRT3|ARHGEF26|LATS2|A…
GO:0070098	2.67484e-08	1	18	81	chemokine-mediated signaling pathway	BP	2.54241e-06	1524|1906|2532|2920|2921|3577|3579|5196|5473|6347|6358|6368|6369|6387|6586|9034|9353|51554	CX3CR1|EDN1|ACKR1|CXCL2|CXCL3|CXCR1|CXCR2|PF4|PPBP|CCL2|CCL14|CCL23|CCL24|CXCL12|SLIT3|CCRL2|SLIT2|ACKR4
GO:0036230	2.91925e-08	1	57	495	granulocyte activation	BP	2.7578e-06	240|306|683|728|820|847|945|948|968|976|1511|1536|1675|2040|2171|2207|2215|2219|2268|2352|2357|2358|3043|3071|3101|3577|3579|4311|4332|4973|5023|5175|5199|5473|5787|5806|6283|6556|6590|7305|9535|10326|11025|22918|25840|56729|57580|80301|84106|84658|126014|140885|150372|160364|199675|353189|100049587	ALOX5|ANXA3|BST1|C5AR1|CAMP|CAT|CD33|CD36|CD68|ADGRE5|CTSG|CYBB|CFD|STOM|FABP5|FCER1G|FCGR3B|FCN1|FGR|FOLR3|FPR1|FPR2|HBB|NCKAP1L|HK3|CXCR1|CXCR2|MME|MNDA|OLR1|P2RX1|PECAM1|CFP|PPBP|PTPRB|PTX3|S100A12|SLC11A1|SLPI|TYROBP|GMFG|SIRPB1|LILRB3|CD93|METTL7A|RETN|PREX1|PLEKHO2|PRAM1|ADGRE3|OSCAR|SIRPA|NFAM1|CLEC12A|MCEMP1|SLCO4C1|SIGLEC14
GO:0051272	3.34479e-08	1	52	420	positive regulation of cellular component movement	BP	3.14065e-06	284|306|650|659|728|1012|1601|1839|1901|1906|2159|2247|2268|2277|2294|2621|2852|2920|2921|3071|3373|3491|3569|4638|4921|5155|5168|5196|5295|5473|5581|6347|6369|6387|6403|7010|7048|8613|9037|9647|9732|9806|10630|23328|23604|56729|57580|80031|84913|91663|152007|154810	ANGPT1|ANXA3|BMP2|BMPR2|C5AR1|CDH13|DAB2|HBEGF|S1PR1|EDN1|F10|FGF2|FGR|VEGFD|FOXF1|GAS6|GPER1|CXCL2|CXCL3|NCKAP1L|HYAL1|CYR61|IL6|MYLK|DDR2|PDGFB|ENPP2|PF4|PIK3R1|PPBP|PRKCE|CCL2|CCL24|CXCL12|SELP|TEK|TGFBR2|PLPP3|SEMA5A|PPM1F|DOCK4|SPOCK2|PDPN|SASH1|DAPK2|RETN|PREX1|SEMA6D|ATOH8|MYADM|GLIPR2|AMOTL1
GO:0030335	3.43376e-08	1	50	395	positive regulation of cell migration	BP	3.20478e-06	284|306|650|659|728|1012|1601|1839|1901|1906|2159|2247|2268|2277|2294|2621|2852|2920|2921|3071|3373|3491|3569|4638|4921|5155|5168|5196|5295|5473|5581|6347|6369|6387|6403|7010|7048|8613|9037|9647|9732|23328|23604|56729|57580|80031|84913|91663|152007|154810	ANGPT1|ANXA3|BMP2|BMPR2|C5AR1|CDH13|DAB2|HBEGF|S1PR1|EDN1|F10|FGF2|FGR|VEGFD|FOXF1|GAS6|GPER1|CXCL2|CXCL3|NCKAP1L|HYAL1|CYR61|IL6|MYLK|DDR2|PDGFB|ENPP2|PF4|PIK3R1|PPBP|PRKCE|CCL2|CCL24|CXCL12|SELP|TEK|TGFBR2|PLPP3|SEMA5A|PPM1F|DOCK4|SASH1|DAPK2|RETN|PREX1|SEMA6D|ATOH8|MYADM|GLIPR2|AMOTL1
GO:0050678	3.54427e-08	1	41	289	regulation of epithelial cell proliferation	BP	3.28811e-06	94|650|659|687|728|857|858|1012|1030|1361|1910|1960|2247|2263|2277|2697|2719|3164|3202|3373|3569|3851|5155|6347|6369|6387|7010|7049|7051|7128|7538|8013|8742|9037|28984|54959|55679|58189|84913|89780|120425	ACVRL1|BMP2|BMPR2|KLF9|C5AR1|CAV1|CAV2|CDH13|CDKN2B|CPB2|EDNRB|EGR3|FGF2|FGFR2|VEGFD|GJA1|GPC3|NR4A1|HOXA5|HYAL1|IL6|KRT4|PDGFB|CCL2|CCL24|CXCL12|TEK|TGFBR3|TGM1|TNFAIP3|ZFP36|NR4A3|TNFSF12|SEMA5A|RGCC|ODAM|LIMS2|WFDC1|ATOH8|WNT3A|JAML
GO:0002283	3.64306e-08	1	56	485	neutrophil activation involved in immune response	BP	3.33976e-06	240|306|683|728|820|847|945|948|968|976|1511|1536|1675|2040|2171|2207|2215|2219|2268|2352|2357|2358|3043|3071|3101|3577|3579|4311|4332|4973|5023|5175|5199|5473|5787|5806|6283|6556|6590|7305|9535|10326|11025|22918|25840|56729|80301|84106|84658|126014|140885|150372|160364|199675|353189|100049587	ALOX5|ANXA3|BST1|C5AR1|CAMP|CAT|CD33|CD36|CD68|ADGRE5|CTSG|CYBB|CFD|STOM|FABP5|FCER1G|FCGR3B|FCN1|FGR|FOLR3|FPR1|FPR2|HBB|NCKAP1L|HK3|CXCR1|CXCR2|MME|MNDA|OLR1|P2RX1|PECAM1|CFP|PPBP|PTPRB|PTX3|S100A12|SLC11A1|SLPI|TYROBP|GMFG|SIRPB1|LILRB3|CD93|METTL7A|RETN|PLEKHO2|PRAM1|ADGRE3|OSCAR|SIRPA|NFAM1|CLEC12A|MCEMP1|SLCO4C1|SIGLEC14
GO:0043312	3.64306e-08	1	56	485	neutrophil degranulation	BP	3.33976e-06	240|306|683|728|820|847|945|948|968|976|1511|1536|1675|2040|2171|2207|2215|2219|2268|2352|2357|2358|3043|3071|3101|3577|3579|4311|4332|4973|5023|5175|5199|5473|5787|5806|6283|6556|6590|7305|9535|10326|11025|22918|25840|56729|80301|84106|84658|126014|140885|150372|160364|199675|353189|100049587	ALOX5|ANXA3|BST1|C5AR1|CAMP|CAT|CD33|CD36|CD68|ADGRE5|CTSG|CYBB|CFD|STOM|FABP5|FCER1G|FCGR3B|FCN1|FGR|FOLR3|FPR1|FPR2|HBB|NCKAP1L|HK3|CXCR1|CXCR2|MME|MNDA|OLR1|P2RX1|PECAM1|CFP|PPBP|PTPRB|PTX3|S100A12|SLC11A1|SLPI|TYROBP|GMFG|SIRPB1|LILRB3|CD93|METTL7A|RETN|PLEKHO2|PRAM1|ADGRE3|OSCAR|SIRPA|NFAM1|CLEC12A|MCEMP1|SLCO4C1|SIGLEC14
GO:2000147	3.7367e-08	1	51	410	positive regulation of cell motility	BP	3.40545e-06	284|306|650|659|728|1012|1601|1839|1901|1906|2159|2247|2268|2277|2294|2621|2852|2920|2921|3071|3373|3491|3569|4638|4921|5155|5168|5196|5295|5473|5581|6347|6369|6387|6403|7010|7048|8613|9037|9647|9732|9806|23328|23604|56729|57580|80031|84913|91663|152007|154810	ANGPT1|ANXA3|BMP2|BMPR2|C5AR1|CDH13|DAB2|HBEGF|S1PR1|EDN1|F10|FGF2|FGR|VEGFD|FOXF1|GAS6|GPER1|CXCL2|CXCL3|NCKAP1L|HYAL1|CYR61|IL6|MYLK|DDR2|PDGFB|ENPP2|PF4|PIK3R1|PPBP|PRKCE|CCL2|CCL24|CXCL12|SELP|TEK|TGFBR2|PLPP3|SEMA5A|PPM1F|DOCK4|SPOCK2|SASH1|DAPK2|RETN|PREX1|SEMA6D|ATOH8|MYADM|GLIPR2|AMOTL1
GO:0040008	4.63393e-08	1	68	618	regulation of growth	BP	4.19844e-06	32|94|153|154|185|186|322|627|659|820|948|1410|1490|1511|1808|1839|1906|2203|2247|2263|2273|2621|2627|2690|2697|2719|3084|3142|3373|3491|4499|4739|4881|5468|5588|5950|6387|6446|6532|6586|6909|6910|7048|7049|7466|8425|8835|8839|9021|9037|9254|9353|9647|10516|11170|23493|26153|26524|51196|51232|51393|56920|58189|64321|80014|81501|85407|89780	ACACB|ACVRL1|ADRB1|ADRB2|AGTR1|AGTR2|APBB1|BDNF|BMPR2|CAMP|CD36|CRYAB|CTGF|CTSG|DPYSL2|HBEGF|EDN1|FBP1|FGF2|FGFR2|FHL1|GAS6|GATA6|GHR|GJA1|GPC3|NRG1|HLX|HYAL1|CYR61|MT1M|NEDD9|NPR1|PPARG|PRKCQ|RBP4|CXCL12|SGK1|SLC6A4|SLIT3|TBX2|TBX5|TGFBR2|TGFBR3|WFS1|LTBP4|SOCS2|WISP2|SOCS3|SEMA5A|CACNA2D2|SLIT2|PPM1F|FBLN5|FAM107A|HEY2|KIF26A|LATS2|PLCE1|CRIM1|TRPV2|SEMA3G|WFDC1|SOX17|WWC2|DCSTAMP|NKD1|WNT3A
GO:0002443	4.8619e-08	1	81	817	leukocyte mediated immunity	BP	4.37939e-06	177|240|306|683|695|710|712|713|714|728|729|730|732|820|847|945|948|968|976|1178|1511|1536|1636|1675|2013|2040|2171|2207|2215|2219|2268|2294|2352|2357|2358|2624|3043|3071|3101|3133|3553|3569|3575|3577|3579|4311|4332|4973|5023|5175|5199|5319|5473|5787|5806|6283|6556|6590|6693|7099|7305|8013|9535|10326|11025|22918|23705|25840|50487|51311|56729|80301|84106|84658|126014|140885|150372|160364|199675|35…	AGER|ALOX5|ANXA3|BST1|BTK|SERPING1|C1QA|C1QB|C1QC|C5AR1|C6|C7|C8B|CAMP|CAT|CD33|CD36|CD68|ADGRE5|CLC|CTSG|CYBB|ACE|CFD|EMP2|STOM|FABP5|FCER1G|FCGR3B|FCN1|FGR|FOXF1|FOLR3|FPR1|FPR2|GATA2|HBB|NCKAP1L|HK3|HLA-E|IL1B|IL6|IL7R|CXCR1|CXCR2|MME|MNDA|OLR1|P2RX1|PECAM1|CFP|PLA2G1B|PPBP|PTPRB|PTX3|S100A12|SLC11A1|SLPI|SPN|TLR4|TYROBP|NR4A3|GMFG|SIRPB1|LILRB3|CD93|CADM1|METTL7A|PLA2G3|TLR8|RETN|PLEKHO2|PRAM…
GO:0031399	5.02879e-08	1	143	1664	regulation of protein modification process	BP	4.50222e-06	94|104|154|177|186|246|284|408|467|554|650|659|683|728|857|858|894|948|1030|1326|1440|1490|1601|1634|1636|1839|1843|1850|1906|1910|1958|2013|2022|2167|2192|2247|2263|2264|2268|2357|2549|2621|2624|2662|2690|2852|3071|3084|3491|3553|3569|4091|4616|4915|4921|5028|5155|5168|5319|5320|5322|5334|5414|5581|6237|6283|6347|6358|6368|6369|6556|6622|6688|6693|7010|7044|7048|7078|7099|7128|7466|8322|8613|865…	ACVRL1|ADARB1|ADRB2|AGER|AGTR2|ALOX15|ANGPT1|ARRB1|ATF3|AVPR2|BMP2|BMPR2|BST1|C5AR1|CAV1|CAV2|CCND2|CD36|CDKN2B|MAP3K8|CSF3|CTGF|DAB2|DCN|ACE|HBEGF|DUSP1|DUSP8|EDN1|EDNRB|EGR1|EMP2|ENG|FABP4|FBLN1|FGF2|FGFR2|FGFR4|FGR|FPR1|GAB1|GAS6|GATA2|GDF10|GHR|GPER1|NCKAP1L|NRG1|CYR61|IL1B|IL6|SMAD6|GADD45B|NTRK2|DDR2|P2RY1|PDGFB|ENPP2|PLA2G1B|PLA2G2A|PLA2G5|PLCL1|SEPT4|PRKCE|RRAS|S100A12|CCL2|CCL14|CCL23|CC…
GO:0007010	5.06943e-08	1	111	1157	cytoskeleton organization	BP	4.50222e-06	246|358|395|408|667|683|845|1073|1264|1410|1440|1490|1674|1808|1901|1906|2009|2013|2037|2824|3055|3071|3851|4628|4629|4739|5295|5319|5581|5592|5734|6347|6369|6387|6622|6711|6867|7010|7111|7148|8994|9037|9353|9535|9647|9912|10129|10174|10391|10395|10529|10580|10763|10810|11013|11076|11346|22808|22885|22899|22998|23237|23336|23345|25802|27019|27063|27285|28984|30846|50487|51196|51364|51673|54959|55…	ALOX15|AQP1|ARHGAP6|ARRB1|DST|BST1|CASQ2|CFL2|CNN1|CRYAB|CSF3|CTGF|DES|DPYSL2|S1PR1|EDN1|EML1|EMP2|EPB41L2|GPM6B|HCK|NCKAP1L|KRT4|MYH10|MYH11|NEDD9|PIK3R1|PLA2G1B|PRKCE|PRKG1|PTGER4|CCL2|CCL24|CXCL12|SNCA|SPTBN1|TACC1|TEK|TMOD1|TNXB|LIMD1|SEMA5A|SLIT2|GMFG|PPM1F|ARHGAP44|FRY|SORBS3|CORO2B|DLC1|NEBL|SORBS1|NES|WASF3|TMSB15A|TPPP|SYNPO|MRAS|ABLIM3|ARHGEF15|LIMCH1|ARC|SYNM|SYNE1|LMOD1|DNAI1|ANKRD1|T…
GO:0045595	5.09387e-08	1	135	1512	regulation of cell differentiation	BP	4.50222e-06	94|177|185|322|627|650|659|695|714|857|947|948|1003|1268|1440|1490|1524|1601|1808|1906|1910|1960|2013|2022|2192|2202|2247|2263|2294|2353|2621|2624|2627|2662|2852|3071|3084|3142|3202|3400|3491|3553|3569|3575|3727|4023|4211|4481|4855|4915|4921|4974|5155|5196|5295|5320|5376|5468|5789|5800|6092|6383|6387|6532|6688|6886|6910|6925|6926|6935|7048|7099|7122|7305|7538|7704|8425|8654|8994|9021|9037|9308|93…	ACVRL1|AGER|AGTR1|APBB1|BDNF|BMP2|BMPR2|BTK|C1QC|CAV1|CD34|CD36|CDH5|CNR1|CSF3|CTGF|CX3CR1|DAB2|DPYSL2|EDN1|EDNRB|EGR3|EMP2|ENG|FBLN1|EFEMP1|FGF2|FGFR2|FOXF1|FOS|GAS6|GATA2|GATA6|GDF10|GPER1|NCKAP1L|NRG1|HLX|HOXA5|ID4|CYR61|IL1B|IL6|IL7R|JUND|LPL|MEIS1|MSR1|NOTCH4|NTRK2|DDR2|OMG|PDGFB|PF4|PIK3R1|PLA2G2A|PMP22|PPARG|PTPRD|PTPRO|ROBO2|SDC2|CXCL12|SLC6A4|SPI1|TAL1|TBX5|TCF4|TBX3|ZEB1|TGFBR2|TLR4|CLD…
GO:0043408	5.11451e-08	1	71	662	regulation of MAPK cascade	BP	4.50222e-06	154|177|246|284|408|467|650|728|857|858|948|1326|1490|1843|1850|1906|2192|2247|2263|2264|2357|2549|2621|2662|2690|2852|3084|3491|3553|3569|4616|4915|5028|5155|5319|5320|5322|5581|6237|6283|6347|6358|6368|6369|7010|7044|7078|7099|8322|8654|9314|9365|9770|9839|10174|23328|23533|51196|57447|65009|114898|120892|152007|152831|168667|255743|285016|338557|388121|388325|653361	ADRB2|AGER|ALOX15|ANGPT1|ARRB1|ATF3|BMP2|C5AR1|CAV1|CAV2|CD36|MAP3K8|CTGF|DUSP1|DUSP8|EDN1|FBLN1|FGF2|FGFR2|FGFR4|FPR1|GAB1|GAS6|GDF10|GHR|GPER1|NRG1|CYR61|IL1B|IL6|GADD45B|NTRK2|P2RY1|PDGFB|PLA2G1B|PLA2G2A|PLA2G5|PRKCE|RRAS|S100A12|CCL2|CCL14|CCL23|CCL24|TEK|LEFTY2|TIMP3|TLR4|FZD4|PDE5A|KLF4|KL|RASSF2|ZEB2|SORBS3|SASH1|PIK3R5|PLCE1|NDRG2|NDRG4|C1QTNF2|LRRK2|GLIPR2|KLB|BMPER|NPNT|ALKAL2|FFAR4|TNF…
GO:0060537	5.20474e-08	1	47	351	muscle tissue development	BP	4.55577e-06	186|467|650|857|858|1073|1634|1901|1906|1958|1959|2022|2247|2263|2353|2627|2697|2702|3084|3142|4223|4628|4629|4638|5950|6445|6909|6910|6926|6943|7048|7049|7134|7832|7881|8516|10529|23493|23764|27063|57158|57493|64321|65009|89780|91624|140706	AGTR2|ATF3|BMP2|CAV1|CAV2|CFL2|DCN|S1PR1|EDN1|EGR1|EGR2|ENG|FGF2|FGFR2|FOS|GATA6|GJA1|GJA5|NRG1|HLX|MEOX2|MYH10|MYH11|MYLK|RBP4|SGCG|TBX2|TBX5|TBX3|TCF21|TGFBR2|TGFBR3|TNNC1|BTG2|KCNAB1|ITGA8|NEBL|HEY2|MAFF|ANKRD1|JPH2|HEG1|SOX17|NDRG4|WNT3A|NEXN|CCM2L
GO:0065008	6.0447e-08	1	261	3494	regulation of biological quality	BP	5.25924e-06	2|32|33|94|153|154|177|185|186|187|216|246|284|358|361|366|408|477|482|554|627|650|659|695|710|728|730|820|845|857|858|947|948|1036|1043|1073|1262|1268|1318|1359|1361|1410|1440|1490|1511|1524|1536|1634|1636|1808|1901|1906|1910|1958|1959|2013|2034|2040|2157|2159|2160|2167|2192|2207|2247|2264|2268|2273|2313|2357|2358|2621|2624|2627|2697|2702|2824|2828|2852|2890|3043|3055|3071|3084|3101|3202|3553|35…	A2M|ACACB|ACADL|ACVRL1|ADRB1|ADRB2|AGER|AGTR1|AGTR2|APLNR|ALDH1A1|ALOX15|ANGPT1|AQP1|AQP4|AQP9|ARRB1|ATP1A2|ATP1B2|AVPR2|BDNF|BMP2|BMPR2|BTK|SERPING1|C5AR1|C7|CAMP|CASQ2|CAV1|CAV2|CD34|CD36|CDO1|CD52|CFL2|CNGA4|CNR1|SLC31A2|CPA3|CPB2|CRYAB|CSF3|CTGF|CTSG|CX3CR1|CYBB|DCN|ACE|DPYSL2|S1PR1|EDN1|EDNRB|EGR1|EGR2|EMP2|EPAS1|STOM|F8|F10|F11|FABP4|FBLN1|FCER1G|FGF2|FGFR4|FGR|FHL1|FLI1|FPR1|FPR2|GAS6|GATA…
GO:0006897	6.07632e-08	1	75	704	endocytosis	BP	5.25924e-06	154|246|284|306|341|408|857|858|948|1012|1601|1808|2207|2214|2219|2268|2621|2624|2690|2719|2890|3039|3040|3043|3055|3071|3553|3577|3579|3949|3953|3988|4360|4481|4973|5168|5175|5295|5468|5581|5806|6347|6401|6441|6456|6556|6614|6622|7048|8547|8685|9332|9936|10203|10216|10266|10268|11037|22918|23237|30846|51554|55911|56241|81035|89780|115677|120892|146722|157869|255738|284654|286133|375033|653509	ADRB2|ALOX15|ANGPT1|ANXA3|APOC1|ARRB1|CAV1|CAV2|CD36|CDH13|DAB2|DPYSL2|FCER1G|FCGR3A|FCN1|FGR|GAS6|GATA2|GHR|GPC3|GRIA1|HBA1|HBA2|HBB|HCK|NCKAP1L|IL1B|CXCR1|CXCR2|LDLR|LEPR|LIPA|MRC1|MSR1|OLR1|ENPP2|PECAM1|PIK3R1|PPARG|PRKCE|PTX3|CCL2|SELE|SFTPD|SH3GL2|SLC11A1|SIGLEC1|SNCA|TGFBR2|FCN3|MARCO|CD163|CD302|CALCRL|PRG4|RAMP2|RAMP3|STON1|CD93|ARC|EHD2|ACKR4|APOBR|SUSD2|COLEC12|WNT3A|NOSTRIN|LRRK2|CD300…
GO:0007015	6.31197e-08	1	46	343	actin filament organization	BP	5.43285e-06	246|395|408|1073|1440|1490|1901|2013|3055|3071|4739|5295|5319|5581|5734|6369|6387|6711|7111|9037|9353|9535|9647|10129|10174|10395|10529|10580|10810|11013|11346|22899|25802|28984|57477|57580|85358|90102|91663|93663|130271|133522|171024|221692|359845|375307	ALOX15|ARHGAP6|ARRB1|CFL2|CSF3|CTGF|S1PR1|EMP2|HCK|NCKAP1L|NEDD9|PIK3R1|PLA2G1B|PRKCE|PTGER4|CCL24|CXCL12|SPTBN1|TMOD1|SEMA5A|SLIT2|GMFG|PPM1F|FRY|SORBS3|DLC1|NEBL|SORBS1|WASF3|TMSB15A|SYNPO|ARHGEF15|LMOD1|RGCC|SHROOM4|PREX1|SHANK3|PHLDB2|MYADM|ARHGAP18|PLEKHH2|PPARGC1B|SYNPO2|PHACTR1|RFLNB|CATIP
GO:0030097	6.91656e-08	1	75	720	hemopoiesis	BP	5.92035e-06	177|284|660|695|714|947|1030|1316|1440|1636|1958|1960|2009|2034|2207|2263|2313|2353|2621|2624|2719|3071|3142|3202|3569|3575|3953|4211|4222|4242|4855|5153|5196|5295|5468|5734|6237|6688|6693|6886|6935|7010|7048|7049|7099|7305|7538|7704|8809|9308|9314|9398|9452|9770|10365|11025|26253|51208|51621|54861|57580|57864|79819|81501|83700|84959|89780|115727|130733|133522|139818|146433|147744|150372|219790	AGER|ANGPT1|BMX|BTK|C1QC|CD34|CDKN2B|KLF6|CSF3|ACE|EGR1|EGR3|EML1|EPAS1|FCER1G|FGFR2|FLI1|FOS|GAS6|GATA2|GPC3|NCKAP1L|HLX|HOXA5|IL6|IL7R|LEPR|MEIS1|MEOX1|MFNG|NOTCH4|PDE1B|PF4|PIK3R1|PPARG|PTGER4|RRAS|SPI1|SPN|TAL1|ZEB1|TEK|TGFBR2|TGFBR3|TLR4|TYROBP|ZFP36|ZBTB16|IL18R1|CD83|KLF4|CD101|ITM2A|RASSF2|KLF2|LILRB3|CLEC4E|CLDN18|KLF13|SNRK|PREX1|SLC46A2|WDR78|DCSTAMP|JAM3|UBASH3B|WNT3A|RASGRP4|TMEM178A…
GO:0048585	7.51166e-08	1	123	1375	negative regulation of response to stimulus	BP	6.3944e-06	2|154|177|186|246|284|408|467|650|710|845|857|858|947|1361|1524|1601|1634|1839|1843|1850|1906|1958|2160|2192|2203|2247|2294|2621|2624|2697|2719|2852|3084|3133|3142|3553|3569|3575|4091|5155|5196|5468|5588|5592|5627|5734|5739|5740|5800|6092|6347|6387|6425|6456|6586|6622|6693|6943|7010|7048|7049|7056|7078|7099|7128|7466|7957|8013|8787|8835|8994|9021|9037|9173|9314|9353|9770|9912|10203|10395|11197|23…	A2M|ADRB2|AGER|AGTR2|ALOX15|ANGPT1|ARRB1|ATF3|BMP2|SERPING1|CASQ2|CAV1|CAV2|CD34|CPB2|CX3CR1|DAB2|DCN|HBEGF|DUSP1|DUSP8|EDN1|EGR1|F11|FBLN1|FBP1|FGF2|FOXF1|GAS6|GATA2|GJA1|GPC3|GPER1|NRG1|HLA-E|HLX|IL1B|IL6|IL7R|SMAD6|PDGFB|PF4|PPARG|PRKCQ|PRKG1|PROS1|PTGER4|PTGIR|PTGIS|PTPRO|ROBO2|CCL2|CXCL12|SFRP5|SH3GL2|SLIT3|SNCA|SPN|TCF21|TEK|TGFBR2|TGFBR3|THBD|TIMP3|TLR4|TNFAIP3|WFS1|EPM2A|NR4A3|RGS9|SOCS2|…
GO:0030198	7.86043e-08	1	44	315	extracellular matrix organization	BP	6.65473e-06	2|1285|1305|1361|1490|1511|1634|1805|1842|2022|2192|2247|2264|2294|2621|2824|3036|3384|3491|4148|4239|4327|4629|4921|5155|5175|7148|7177|7450|8434|8516|9806|10266|10319|10516|25890|28984|54507|58494|79625|83700|89780|90102|255743	A2M|COL4A3|COL13A1|CPB2|CTGF|CTSG|DCN|DPT|ECM2|ENG|FBLN1|FGF2|FGFR4|FOXF1|GAS6|GPM6B|HAS1|ICAM2|CYR61|MATN3|MFAP4|MMP19|MYH11|DDR2|PDGFB|PECAM1|TNXB|TPSAB1|VWF|RECK|ITGA8|SPOCK2|RAMP2|LAMC3|FBLN5|ABI3BP|RGCC|ADAMTSL4|JAM2|NDNF|JAM3|WNT3A|PHLDB2|NPNT
GO:0043062	8.72238e-08	1	44	316	extracellular structure organization	BP	7.34434e-06	2|1285|1305|1361|1490|1511|1634|1805|1842|2022|2192|2247|2264|2294|2621|2824|3036|3384|3491|4148|4239|4327|4629|4921|5155|5175|7148|7177|7450|8434|8516|9806|10266|10319|10516|25890|28984|54507|58494|79625|83700|89780|90102|255743	A2M|COL4A3|COL13A1|CPB2|CTGF|CTSG|DCN|DPT|ECM2|ENG|FBLN1|FGF2|FGFR4|FOXF1|GAS6|GPM6B|HAS1|ICAM2|CYR61|MATN3|MFAP4|MMP19|MYH11|DDR2|PDGFB|PECAM1|TNXB|TPSAB1|VWF|RECK|ITGA8|SPOCK2|RAMP2|LAMC3|FBLN5|ABI3BP|RGCC|ADAMTSL4|JAM2|NDNF|JAM3|WNT3A|PHLDB2|NPNT
GO:0071345	9.14522e-08	1	72	720	cellular response to cytokine stimulus	BP	7.64654e-06	246|284|361|695|857|1271|1440|1524|1634|1906|1958|2167|2294|2532|2549|2621|2690|2819|2852|2920|2921|3055|3133|3373|3553|3563|3568|3569|3575|3577|3579|3953|3977|4311|4360|5138|5153|5155|5196|5468|5473|5740|6347|6358|6368|6369|6387|6404|6586|7128|7538|8742|8809|8835|9021|9034|9173|9353|10365|23767|25939|27063|51208|51554|53832|53905|55022|64101|81501|94030|146722|255743	ALOX15|ANGPT1|AQP4|BTK|CAV1|CNTFR|CSF3|CX3CR1|DCN|EDN1|EGR1|FABP4|FOXF1|ACKR1|GAB1|GAS6|GHR|GPD1|GPER1|CXCL2|CXCL3|HCK|HLA-E|HYAL1|IL1B|IL3RA|IL5RA|IL6|IL7R|CXCR1|CXCR2|LEPR|LIFR|MME|MRC1|PDE2A|PDE1B|PDGFB|PF4|PPARG|PPBP|PTGIS|CCL2|CCL14|CCL23|CCL24|CXCL12|SELPLG|SLIT3|TNFAIP3|ZFP36|TNFSF12|IL18R1|SOCS2|SOCS3|CCRL2|IL1RL1|SLIT2|KLF2|FLRT3|SAMHD1|ANKRD1|CLDN18|ACKR4|IL20RA|DUOX1|PID1|LRRC4|DCSTAMP…
GO:0003012	9.18e-08	1	50	402	muscle system process	BP	7.64654e-06	154|186|477|845|857|1264|1410|1490|1674|1906|1910|2627|2697|2702|2852|3553|3762|4629|4638|5023|5028|5348|5592|6323|6330|6332|6442|6769|7111|7134|7136|7402|7433|8013|8654|9314|9732|10174|10203|10316|10398|10580|23336|23493|25802|28999|29995|51196|126393|255743	ADRB2|AGTR2|ATP1A2|CASQ2|CAV1|CNN1|CRYAB|CTGF|DES|EDN1|EDNRB|GATA6|GJA1|GJA5|GPER1|IL1B|KCNJ5|MYH11|MYLK|P2RX1|P2RY1|FXYD1|PRKG1|SCN1A|SCN4B|SCN7A|SGCA|STAC|TMOD1|TNNC1|TNNI2|UTRN|VIPR1|NR4A3|PDE5A|KLF4|DOCK4|SORBS3|CALCRL|NMUR1|MYL9|SORBS1|SYNM|HEY2|LMOD1|KLF15|LMCD1|PLCE1|HSPB6|NPNT
GO:0040007	9.62489e-08	1	91	926	growth	BP	7.97425e-06	32|94|104|153|154|185|186|322|627|659|820|948|1410|1490|1511|1808|1839|1901|1906|2012|2203|2247|2263|2273|2621|2627|2690|2697|2719|3084|3142|3202|3373|3491|3569|3575|3953|4499|4739|4881|4921|5468|5588|5950|6387|6414|6442|6446|6456|6532|6586|6909|6910|7044|7048|7049|7466|8425|8835|8839|9021|9037|9254|9353|9647|9839|10365|10516|11170|23371|23493|23767|26153|26524|51196|51232|51393|56920|57493|58189…	ACACB|ACVRL1|ADARB1|ADRB1|ADRB2|AGTR1|AGTR2|APBB1|BDNF|BMPR2|CAMP|CD36|CRYAB|CTGF|CTSG|DPYSL2|HBEGF|S1PR1|EDN1|EMP1|FBP1|FGF2|FGFR2|FHL1|GAS6|GATA6|GHR|GJA1|GPC3|NRG1|HLX|HOXA5|HYAL1|CYR61|IL6|IL7R|LEPR|MT1M|NEDD9|NPR1|DDR2|PPARG|PRKCQ|RBP4|CXCL12|SELENOP|SGCA|SGK1|SH3GL2|SLC6A4|SLIT3|TBX2|TBX5|LEFTY2|TGFBR2|TGFBR3|WFS1|LTBP4|SOCS2|WISP2|SOCS3|SEMA5A|CACNA2D2|SLIT2|PPM1F|ZEB2|KLF2|FBLN5|FAM107A|T…
GO:0001655	9.9502e-08	1	44	315	urogenital system development	BP	8.19991e-06	185|186|284|650|847|947|1285|1634|1636|1958|2247|2263|2294|2624|2719|2828|3400|4091|4093|4311|5155|5175|5800|5950|6092|6943|7010|7466|7704|8516|9353|9510|23371|28999|51196|51301|64321|79192|79633|80144|120892|168667|255738|255743	AGTR1|AGTR2|ANGPT1|BMP2|CAT|CD34|COL4A3|DCN|ACE|EGR1|FGF2|FGFR2|FOXF1|GATA2|GPC3|GPR4|ID4|SMAD6|SMAD9|MME|PDGFB|PECAM1|PTPRO|RBP4|ROBO2|TCF21|TEK|WFS1|ZBTB16|ITGA8|SLIT2|ADAMTS1|TNS2|KLF15|PLCE1|GCNT4|SOX17|IRX1|FAT4|FRAS1|LRRK2|BMPER|PCSK9|NPNT
GO:0010632	1.00661e-07	1	30	176	regulation of epithelial cell migration	BP	8.25152e-06	94|186|284|306|659|1634|1839|1906|2013|2247|3373|4223|5155|5168|5581|7010|7048|8613|9037|9314|9353|9647|23328|28984|79812|84913|90627|152007|154810|168667	ACVRL1|AGTR2|ANGPT1|ANXA3|BMPR2|DCN|HBEGF|EDN1|EMP2|FGF2|HYAL1|MEOX2|PDGFB|ENPP2|PRKCE|TEK|TGFBR2|PLPP3|SEMA5A|KLF4|SLIT2|PPM1F|SASH1|RGCC|MMRN2|ATOH8|STARD13|GLIPR2|AMOTL1|BMPER
GO:0090130	1.12148e-07	1	36	239	tissue migration	BP	9.14482e-06	94|186|284|306|659|1012|1634|1839|1906|1960|2013|2247|2294|3164|3373|4223|5155|5168|5581|7010|7048|8742|9037|9314|9353|9647|9839|23328|28984|54345|79812|84913|90627|152007|154810|168667	ACVRL1|AGTR2|ANGPT1|ANXA3|BMPR2|CDH13|DCN|HBEGF|EDN1|EGR3|EMP2|FGF2|FOXF1|NR4A1|HYAL1|MEOX2|PDGFB|ENPP2|PRKCE|TEK|TGFBR2|TNFSF12|SEMA5A|KLF4|SLIT2|PPM1F|ZEB2|SASH1|RGCC|SOX18|MMRN2|ATOH8|STARD13|GLIPR2|AMOTL1|BMPER
GO:0051345	1.16293e-07	1	93	945	positive regulation of hydrolase activity	BP	9.43311e-06	2|153|185|186|216|284|395|408|482|650|728|857|858|1285|1490|1839|1901|2192|2247|2263|2264|2674|2852|3071|3084|3491|3563|3568|5023|5155|5319|5322|5468|5581|5739|5923|6347|6358|6368|6369|6401|6622|6711|7010|8698|8787|9365|9411|9459|9647|9732|9754|9912|10044|10316|10395|11069|11080|22898|22899|23645|26084|26166|26577|27147|51196|53358|54959|57514|57580|58484|64407|64411|80243|83478|83595|89780|90627…	A2M|ADRB1|AGTR1|AGTR2|ALDH1A1|ANGPT1|ARHGAP6|ARRB1|ATP1B2|BMP2|C5AR1|CAV1|CAV2|COL4A3|CTGF|HBEGF|S1PR1|FBLN1|FGF2|FGFR2|FGFR4|GFRA1|GPER1|NCKAP1L|NRG1|CYR61|IL3RA|IL5RA|P2RX1|PDGFB|PLA2G1B|PLA2G5|PPARG|PRKCE|PTGIR|RASGRF1|CCL2|CCL14|CCL23|CCL24|SELE|SNCA|SPTBN1|TEK|S1PR4|RGS9|KL|ARHGAP29|ARHGEF6|PPM1F|DOCK4|STARD8|ARHGAP44|SH2D3C|NMUR1|DLC1|RAPGEF4|DNAJB4|DENND3|ARHGEF15|PPP1R15A|ARHGEF26|RGS22|P…
GO:0031589	1.24191e-07	1	43	305	cell-substrate adhesion	BP	1.00213e-05	94|246|284|395|683|947|948|1012|1305|1490|1842|2013|2192|2294|2621|2824|3491|4091|5295|5581|5800|6614|7010|7402|7450|8322|8516|9647|9806|10174|10395|10516|10580|10894|25890|55698|57580|79625|79834|83700|90102|91663|255743	ACVRL1|ALOX15|ANGPT1|ARHGAP6|BST1|CD34|CD36|CDH13|COL13A1|CTGF|ECM2|EMP2|FBLN1|FOXF1|GAS6|GPM6B|CYR61|SMAD6|PIK3R1|PRKCE|PTPRO|SIGLEC1|TEK|UTRN|VWF|FZD4|ITGA8|PPM1F|SPOCK2|SORBS3|DLC1|FBLN5|SORBS1|LYVE1|ABI3BP|RADIL|PREX1|NDNF|PEAK1|JAM3|PHLDB2|MYADM|NPNT
GO:0090022	1.28502e-07	1	11	32	regulation of neutrophil chemotaxis	BP	1.03155e-05	683|728|1906|2920|2921|3071|5196|5473|9353|23604|83700	BST1|C5AR1|EDN1|CXCL2|CXCL3|NCKAP1L|PF4|PPBP|SLIT2|DAPK2|JAM3
GO:0014706	1.30233e-07	1	45	337	striated muscle tissue development	BP	1.04005e-05	186|467|650|857|858|1073|1634|1901|1906|1958|1959|2022|2247|2263|2353|2627|2697|2702|3084|3142|4223|4628|4629|5950|6445|6909|6910|6926|6943|7048|7049|7134|7832|7881|10529|23493|23764|27063|57158|57493|64321|65009|89780|91624|140706	AGTR2|ATF3|BMP2|CAV1|CAV2|CFL2|DCN|S1PR1|EDN1|EGR1|EGR2|ENG|FGF2|FGFR2|FOS|GATA6|GJA1|GJA5|NRG1|HLX|MEOX2|MYH10|MYH11|RBP4|SGCG|TBX2|TBX5|TBX3|TCF21|TGFBR2|TGFBR3|TNNC1|BTG2|KCNAB1|NEBL|HEY2|MAFF|ANKRD1|JPH2|HEG1|SOX17|NDRG4|WNT3A|NEXN|CCM2L
GO:0006796	1.35944e-07	1	233	3090	phosphate-containing compound metabolic process	BP	1.07866e-05	54|94|104|153|154|177|186|203|216|246|250|284|341|358|408|467|477|554|650|659|660|683|695|728|761|847|857|858|894|948|1030|1326|1410|1440|1490|1511|1601|1634|1636|1839|1843|1850|1906|1910|2013|2022|2078|2167|2171|2192|2202|2203|2247|2263|2264|2268|2327|2357|2549|2621|2627|2662|2674|2690|2819|2852|2869|2977|3055|3071|3084|3101|3340|3491|3553|3563|3568|3569|3949|4023|4091|4093|4337|4616|4638|4881|4…	ACP5|ACVRL1|ADARB1|ADRB1|ADRB2|AGER|AGTR2|AK1|ALDH1A1|ALOX15|ALPP|ANGPT1|APOC1|AQP1|ARRB1|ATF3|ATP1A2|AVPR2|BMP2|BMPR2|BMX|BST1|BTK|C5AR1|CA3|CAT|CAV1|CAV2|CCND2|CD36|CDKN2B|MAP3K8|CRYAB|CSF3|CTGF|CTSG|DAB2|DCN|ACE|HBEGF|DUSP1|DUSP8|EDN1|EDNRB|EMP2|ENG|ERG|FABP4|FABP5|FBLN1|EFEMP1|FBP1|FGF2|FGFR2|FGFR4|FGR|FMO2|FPR1|GAB1|GAS6|GATA6|GDF10|GFRA1|GHR|GPD1|GPER1|GRK5|GUCY1A2|HCK|NCKAP1L|NRG1|HK3|NDST…
GO:0001822	1.36769e-07	1	39	265	kidney development	BP	1.07866e-05	185|186|284|650|847|947|1285|1634|1636|1958|2247|2263|2719|2828|4091|4093|4311|5155|5175|5800|6092|6943|7010|7466|7704|8516|9353|9510|23371|28999|51196|51301|79192|79633|80144|120892|168667|255738|255743	AGTR1|AGTR2|ANGPT1|BMP2|CAT|CD34|COL4A3|DCN|ACE|EGR1|FGF2|FGFR2|GPC3|GPR4|SMAD6|SMAD9|MME|PDGFB|PECAM1|PTPRO|ROBO2|TCF21|TEK|WFS1|ZBTB16|ITGA8|SLIT2|ADAMTS1|TNS2|KLF15|PLCE1|GCNT4|IRX1|FAT4|FRAS1|LRRK2|BMPER|PCSK9|NPNT
GO:0035556	1.37156e-07	1	204	2585	intracellular signal transduction	BP	1.07866e-05	2|153|154|177|185|186|246|284|395|408|467|477|554|650|660|683|695|728|845|847|857|858|948|1012|1326|1410|1440|1490|1634|1827|1839|1843|1850|1906|1910|2159|2192|2203|2247|2263|2264|2268|2357|2549|2621|2662|2674|2690|2697|2828|2852|2977|3084|3340|3491|3553|3563|3568|3569|4616|4881|4883|4915|5028|5138|5155|5196|5295|5319|5320|5322|5325|5334|5414|5581|5588|5592|5596|5734|5737|5739|5923|6237|6283|6347…	A2M|ADRB1|ADRB2|AGER|AGTR1|AGTR2|ALOX15|ANGPT1|ARHGAP6|ARRB1|ATF3|ATP1A2|AVPR2|BMP2|BMX|BST1|BTK|C5AR1|CASQ2|CAT|CAV1|CAV2|CD36|CDH13|MAP3K8|CRYAB|CSF3|CTGF|DCN|RCAN1|HBEGF|DUSP1|DUSP8|EDN1|EDNRB|F10|FBLN1|FBP1|FGF2|FGFR2|FGFR4|FGR|FPR1|GAB1|GAS6|GDF10|GFRA1|GHR|GJA1|GPR4|GPER1|GUCY1A2|NRG1|NDST1|CYR61|IL1B|IL3RA|IL5RA|IL6|GADD45B|NPR1|NPR3|NTRK2|P2RY1|PDE2A|PDGFB|PF4|PIK3R1|PLA2G1B|PLA2G2A|PLA2G…
GO:0003018	1.42432e-07	1	27	154	vascular process in circulatory system	BP	1.1145e-05	153|154|185|186|284|477|554|659|857|1636|1906|1910|2697|2702|2852|3043|4881|5023|5028|5138|5592|6532|7010|8862|9353|9732|10266	ADRB1|ADRB2|AGTR1|AGTR2|ANGPT1|ATP1A2|AVPR2|BMPR2|CAV1|ACE|EDN1|EDNRB|GJA1|GJA5|GPER1|HBB|NPR1|P2RX1|P2RY1|PDE2A|PRKG1|SLC6A4|TEK|APLN|SLIT2|DOCK4|RAMP2
GO:0032268	1.45972e-07	1	185	2354	regulation of cellular protein metabolic process	BP	1.13645e-05	2|94|104|154|177|185|186|246|284|358|408|467|554|650|659|683|710|728|729|857|858|894|948|1030|1285|1326|1361|1440|1473|1490|1601|1634|1636|1839|1843|1850|1906|1910|1958|2013|2022|2167|2192|2247|2263|2264|2268|2357|2549|2621|2624|2662|2690|2719|2852|3071|3084|3491|3553|3569|3730|4091|4616|4915|4921|5023|5028|5155|5168|5319|5320|5322|5334|5414|5468|5581|5627|6237|6283|6347|6358|6368|6369|6556|6590|…	A2M|ACVRL1|ADARB1|ADRB2|AGER|AGTR1|AGTR2|ALOX15|ANGPT1|AQP1|ARRB1|ATF3|AVPR2|BMP2|BMPR2|BST1|SERPING1|C5AR1|C6|CAV1|CAV2|CCND2|CD36|CDKN2B|COL4A3|MAP3K8|CPB2|CSF3|CST5|CTGF|DAB2|DCN|ACE|HBEGF|DUSP1|DUSP8|EDN1|EDNRB|EGR1|EMP2|ENG|FABP4|FBLN1|FGF2|FGFR2|FGFR4|FGR|FPR1|GAB1|GAS6|GATA2|GDF10|GHR|GPC3|GPER1|NCKAP1L|NRG1|CYR61|IL1B|IL6|ANOS1|SMAD6|GADD45B|NTRK2|DDR2|P2RX1|P2RY1|PDGFB|ENPP2|PLA2G1B|PLA2…
GO:0010631	1.5059e-07	1	35	230	epithelial cell migration	BP	1.16654e-05	94|186|284|306|659|1012|1634|1839|1906|1960|2013|2247|3164|3373|4223|5155|5168|5581|7010|7048|8742|9037|9314|9353|9647|9839|23328|28984|54345|79812|84913|90627|152007|154810|168667	ACVRL1|AGTR2|ANGPT1|ANXA3|BMPR2|CDH13|DCN|HBEGF|EDN1|EGR3|EMP2|FGF2|NR4A1|HYAL1|MEOX2|PDGFB|ENPP2|PRKCE|TEK|TGFBR2|TNFSF12|SEMA5A|KLF4|SLIT2|PPM1F|ZEB2|SASH1|RGCC|SOX18|MMRN2|ATOH8|STARD13|GLIPR2|AMOTL1|BMPER
GO:0032496	1.57906e-07	1	40	304	response to lipopolysaccharide	BP	1.21713e-05	728|948|1268|1440|1511|1524|1634|1906|1910|2353|2697|2920|2921|3055|3553|3569|3727|4129|4360|5196|5473|5581|5734|5737|5739|6347|6401|6403|6556|6590|6622|7056|7099|7128|7356|7538|9450|23328|27063|57088	C5AR1|CD36|CNR1|CSF3|CTSG|CX3CR1|DCN|EDN1|EDNRB|FOS|GJA1|CXCL2|CXCL3|HCK|IL1B|IL6|JUND|MAOB|MRC1|PF4|PPBP|PRKCE|PTGER4|PTGFR|PTGIR|CCL2|SELE|SELP|SLC11A1|SLPI|SNCA|THBD|TLR4|TNFAIP3|SCGB1A1|ZFP36|LY86|SASH1|ANKRD1|PLSCR4
GO:0006793	1.61875e-07	1	238	3179	phosphorus metabolic process	BP	1.24155e-05	32|54|94|104|153|154|177|186|203|216|246|250|284|341|358|408|467|477|554|650|659|660|683|695|728|761|847|857|858|894|948|1030|1326|1410|1440|1490|1511|1601|1634|1636|1839|1843|1850|1906|1910|2013|2022|2078|2167|2171|2192|2202|2203|2247|2263|2264|2268|2327|2357|2549|2621|2627|2662|2674|2690|2819|2852|2869|2977|3055|3071|3084|3101|3340|3491|3553|3563|3568|3569|3949|4023|4091|4093|4337|4616|4638|488…	ACACB|ACP5|ACVRL1|ADARB1|ADRB1|ADRB2|AGER|AGTR2|AK1|ALDH1A1|ALOX15|ALPP|ANGPT1|APOC1|AQP1|ARRB1|ATF3|ATP1A2|AVPR2|BMP2|BMPR2|BMX|BST1|BTK|C5AR1|CA3|CAT|CAV1|CAV2|CCND2|CD36|CDKN2B|MAP3K8|CRYAB|CSF3|CTGF|CTSG|DAB2|DCN|ACE|HBEGF|DUSP1|DUSP8|EDN1|EDNRB|EMP2|ENG|ERG|FABP4|FABP5|FBLN1|EFEMP1|FBP1|FGF2|FGFR2|FGFR4|FGR|FMO2|FPR1|GAB1|GAS6|GATA6|GDF10|GFRA1|GHR|GPD1|GPER1|GRK5|GUCY1A2|HCK|NCKAP1L|NRG1|HK…
GO:0003008	1.65797e-07	1	155	1998	system process	BP	1.26537e-05	94|104|153|154|185|186|284|358|361|366|477|482|554|590|659|710|728|745|845|857|894|947|948|1262|1264|1268|1285|1359|1410|1490|1511|1524|1636|1674|1827|1839|1901|1906|1910|1959|2013|2034|2202|2313|2353|2621|2627|2697|2702|2852|2890|3043|3084|3202|3553|3569|3762|3777|3949|4223|4311|4628|4629|4638|4881|4883|4900|4915|4973|5023|5028|5138|5153|5155|5348|5468|5592|5800|5923|5950|6323|6330|6332|6387|642…	ACVRL1|ADARB1|ADRB1|ADRB2|AGTR1|AGTR2|ANGPT1|AQP1|AQP4|AQP9|ATP1A2|ATP1B2|AVPR2|BCHE|BMPR2|SERPING1|C5AR1|MYRF|CASQ2|CAV1|CCND2|CD34|CD36|CNGA4|CNN1|CNR1|COL4A3|CPA3|CRYAB|CTGF|CTSG|CX3CR1|ACE|DES|RCAN1|HBEGF|S1PR1|EDN1|EDNRB|EGR2|EMP2|EPAS1|EFEMP1|FLI1|FOS|GAS6|GATA6|GJA1|GJA5|GPER1|GRIA1|HBB|NRG1|HOXA5|IL1B|IL6|KCNJ5|KCNK3|LDLR|MEOX2|MME|MYH10|MYH11|MYLK|NPR1|NPR3|NRGN|NTRK2|OLR1|P2RX1|P2RY1|PD…
GO:0032970	1.74985e-07	1	44	329	regulation of actin filament-based process	BP	1.32894e-05	246|395|477|683|857|1073|1440|1490|1901|1906|2702|2824|3055|3071|5295|5581|5734|6369|6387|6711|7010|7111|7134|9037|9353|9535|9647|9912|10174|10395|11346|22899|25802|28984|54959|57580|83700|85358|85458|90102|91663|93663|130271|171024	ALOX15|ARHGAP6|ATP1A2|BST1|CAV1|CFL2|CSF3|CTGF|S1PR1|EDN1|GJA5|GPM6B|HCK|NCKAP1L|PIK3R1|PRKCE|PTGER4|CCL24|CXCL12|SPTBN1|TEK|TMOD1|TNNC1|SEMA5A|SLIT2|GMFG|PPM1F|ARHGAP44|SORBS3|DLC1|SYNPO|ARHGEF15|LMOD1|RGCC|ODAM|PREX1|JAM3|SHANK3|DIXDC1|PHLDB2|MYADM|ARHGAP18|PLEKHH2|SYNPO2
GO:0098801	1.82475e-07	1	12	35	regulation of renal system process	BP	1.37907e-05	185|186|554|1906|1910|2013|2621|2697|2702|4881|5155|5800	AGTR1|AGTR2|AVPR2|EDN1|EDNRB|EMP2|GAS6|GJA1|GJA5|NPR1|PDGFB|PTPRO
GO:0051050	1.92233e-07	1	88	915	positive regulation of transport	BP	1.44576e-05	186|284|322|358|408|482|857|947|948|1361|1440|1601|1906|1910|2040|2207|2219|2268|2273|2621|2624|2697|2719|2852|3071|3084|3133|3553|3569|4023|4638|4881|5023|5028|5155|5243|5295|5319|5348|5468|5581|5734|5806|5950|6330|6347|6387|6401|6441|6446|6532|6556|6622|6711|7099|7466|8013|8809|8862|9002|9037|9173|9619|10316|10580|22885|23237|23705|25924|26253|27063|28984|30846|51311|51393|51744|55600|56729|571…	AGTR2|ANGPT1|APBB1|AQP1|ARRB1|ATP1B2|CAV1|CD34|CD36|CPB2|CSF3|DAB2|EDN1|EDNRB|STOM|FCER1G|FCN1|FGR|FHL1|GAS6|GATA2|GJA1|GPC3|GPER1|NCKAP1L|NRG1|HLA-E|IL1B|IL6|LPL|MYLK|NPR1|P2RX1|P2RY1|PDGFB|ABCB1|PIK3R1|PLA2G1B|FXYD1|PPARG|PRKCE|PTGER4|PTX3|RBP4|SCN4B|CCL2|CXCL12|SELE|SFTPD|SGK1|SLC6A4|SLC11A1|SNCA|SPTBN1|TLR4|WFS1|NR4A3|IL18R1|APLN|F2RL3|SEMA5A|IL1RL1|ABCG1|NMUR1|SORBS1|ABLIM3|ARC|CADM1|MYRIP|C…
GO:0090132	1.94579e-07	1	35	233	epithelium migration	BP	1.45634e-05	94|186|284|306|659|1012|1634|1839|1906|1960|2013|2247|3164|3373|4223|5155|5168|5581|7010|7048|8742|9037|9314|9353|9647|9839|23328|28984|54345|79812|84913|90627|152007|154810|168667	ACVRL1|AGTR2|ANGPT1|ANXA3|BMPR2|CDH13|DCN|HBEGF|EDN1|EGR3|EMP2|FGF2|NR4A1|HYAL1|MEOX2|PDGFB|ENPP2|PRKCE|TEK|TGFBR2|TNFSF12|SEMA5A|KLF4|SLIT2|PPM1F|ZEB2|SASH1|RGCC|SOX18|MMRN2|ATOH8|STARD13|GLIPR2|AMOTL1|BMPER
GO:0003007	2.09979e-07	1	35	230	heart morphogenesis	BP	1.56404e-05	94|650|659|1901|2022|2078|2263|2294|2627|2702|3084|3491|4091|5950|6909|6910|6926|7010|7048|7049|7122|7134|9510|10395|23493|27063|54345|55273|57493|64321|65009|79633|89780|140706|200894	ACVRL1|BMP2|BMPR2|S1PR1|ENG|ERG|FGFR2|FOXF1|GATA6|GJA5|NRG1|CYR61|SMAD6|RBP4|TBX2|TBX5|TBX3|TEK|TGFBR2|TGFBR3|CLDN5|TNNC1|ADAMTS1|DLC1|HEY2|ANKRD1|SOX18|TMEM100|HEG1|SOX17|NDRG4|FAT4|WNT3A|CCM2L|ARL13B
GO:0043542	2.24153e-07	1	27	156	endothelial cell migration	BP	1.66162e-05	94|186|284|306|659|1012|1634|1906|1960|2013|2247|3164|4223|5155|7010|8742|9037|9314|9353|23328|28984|54345|79812|84913|90627|154810|168667	ACVRL1|AGTR2|ANGPT1|ANXA3|BMPR2|CDH13|DCN|EDN1|EGR3|EMP2|FGF2|NR4A1|MEOX2|PDGFB|TEK|TNFSF12|SEMA5A|KLF4|SLIT2|SASH1|RGCC|SOX18|MMRN2|ATOH8|STARD13|AMOTL1|BMPER
GO:0010594	2.30443e-07	1	23	118	regulation of endothelial cell migration	BP	1.70012e-05	94|186|284|306|659|1634|1906|2013|2247|4223|5155|7010|8613|9037|9314|9353|23328|28984|79812|84913|90627|154810|168667	ACVRL1|AGTR2|ANGPT1|ANXA3|BMPR2|DCN|EDN1|EMP2|FGF2|MEOX2|PDGFB|TEK|PLPP3|SEMA5A|KLF4|SLIT2|SASH1|RGCC|MMRN2|ATOH8|STARD13|AMOTL1|BMPER
GO:0032956	2.46638e-07	1	40	289	regulation of actin cytoskeleton organization	BP	1.8044e-05	246|395|683|1073|1440|1490|1901|1906|2824|3055|3071|5295|5581|5734|6369|6387|6711|7010|7111|9037|9353|9535|9647|9912|10174|10395|11346|22899|25802|28984|54959|57580|83700|85358|85458|90102|91663|93663|130271|171024	ALOX15|ARHGAP6|BST1|CFL2|CSF3|CTGF|S1PR1|EDN1|GPM6B|HCK|NCKAP1L|PIK3R1|PRKCE|PTGER4|CCL24|CXCL12|SPTBN1|TEK|TMOD1|SEMA5A|SLIT2|GMFG|PPM1F|ARHGAP44|SORBS3|DLC1|SYNPO|ARHGEF15|LMOD1|RGCC|ODAM|PREX1|JAM3|SHANK3|DIXDC1|PHLDB2|MYADM|ARHGAP18|PLEKHH2|SYNPO2
GO:0007169	2.46907e-07	1	72	680	transmembrane receptor protein tyrosine kinase signaling pathway	BP	1.8044e-05	154|186|284|627|650|659|660|695|858|1012|1285|1490|1536|1634|1839|2202|2247|2263|2264|2268|2277|2549|2674|2690|2852|3055|3071|3084|3340|3553|3730|4688|4915|4919|4921|5155|5166|5295|5588|5739|6347|6383|6456|6503|6622|7010|8322|8835|9021|9046|9068|9365|9770|10580|23767|29992|51196|51232|53358|55022|64397|64399|65009|79633|79652|79812|84959|89853|115727|152831|245972|653361	ADRB2|AGTR2|ANGPT1|BDNF|BMP2|BMPR2|BMX|BTK|CAV2|CDH13|COL4A3|CTGF|CYBB|DCN|HBEGF|EFEMP1|FGF2|FGFR2|FGFR4|FGR|VEGFD|GAB1|GFRA1|GHR|GPER1|HCK|NCKAP1L|NRG1|NDST1|IL1B|ANOS1|NCF2|NTRK2|ROR1|DDR2|PDGFB|PDK4|PIK3R1|PRKCQ|PTGIR|CCL2|SDC2|SH3GL2|SLA|SNCA|TEK|FZD4|SOCS2|SOCS3|DOK2|ANGPTL1|KL|RASSF2|SORBS1|FLRT3|PILRA|PLCE1|CRIM1|SHC3|PID1|ZNF106|HHIP|NDRG4|FAT4|TMEM204|MMRN2|UBASH3B|MVB12B|RASGRP4|KLB|ATP…
GO:0097435	2.65323e-07	1	62	553	supramolecular fiber organization	BP	1.92988e-05	246|395|408|845|948|1073|1410|1440|1490|1674|1805|1901|1906|2013|3055|3071|4239|4628|4629|4739|4921|5295|5319|5581|5734|6369|6387|6622|6711|7111|7148|9037|9353|9535|9647|10129|10174|10395|10529|10580|10810|11013|11076|11346|22899|25802|27063|28984|51673|57477|57580|58529|85358|90102|91663|93663|130271|133522|171024|221692|359845|375307	ALOX15|ARHGAP6|ARRB1|CASQ2|CD36|CFL2|CRYAB|CSF3|CTGF|DES|DPT|S1PR1|EDN1|EMP2|HCK|NCKAP1L|MFAP4|MYH10|MYH11|NEDD9|DDR2|PIK3R1|PLA2G1B|PRKCE|PTGER4|CCL24|CXCL12|SNCA|SPTBN1|TMOD1|TNXB|SEMA5A|SLIT2|GMFG|PPM1F|FRY|SORBS3|DLC1|NEBL|SORBS1|WASF3|TMSB15A|TPPP|SYNPO|ARHGEF15|LMOD1|ANKRD1|RGCC|TPPP3|SHROOM4|PREX1|MYOZ1|SHANK3|PHLDB2|MYADM|ARHGAP18|PLEKHH2|PPARGC1B|SYNPO2|PHACTR1|RFLNB|CATIP
GO:0001935	2.69366e-07	1	22	113	endothelial cell proliferation	BP	1.94278e-05	94|650|659|857|858|947|1012|1960|2247|2277|2697|3164|5155|6347|6369|6387|7010|8742|9037|28984|84913|168667	ACVRL1|BMP2|BMPR2|CAV1|CAV2|CD34|CDH13|EGR3|FGF2|VEGFD|GJA1|NR4A1|PDGFB|CCL2|CCL24|CXCL12|TEK|TNFSF12|SEMA5A|RGCC|ATOH8|BMPER
GO:0048534	2.69604e-07	1	76	760	hematopoietic or lymphoid organ development	BP	1.94278e-05	177|284|660|695|714|947|1030|1316|1440|1636|1958|1960|2009|2034|2207|2263|2313|2353|2621|2624|2719|3071|3142|3202|3569|3575|3953|4211|4222|4242|4855|5153|5196|5295|5468|5734|6237|6688|6693|6886|6935|6943|7010|7048|7049|7099|7305|7538|7704|8809|9308|9314|9398|9452|9770|10365|11025|26253|51208|51621|54861|57580|57864|79819|81501|83700|84959|89780|115727|130733|133522|139818|146433|147744|150372|219…	AGER|ANGPT1|BMX|BTK|C1QC|CD34|CDKN2B|KLF6|CSF3|ACE|EGR1|EGR3|EML1|EPAS1|FCER1G|FGFR2|FLI1|FOS|GAS6|GATA2|GPC3|NCKAP1L|HLX|HOXA5|IL6|IL7R|LEPR|MEIS1|MEOX1|MFNG|NOTCH4|PDE1B|PF4|PIK3R1|PPARG|PTGER4|RRAS|SPI1|SPN|TAL1|ZEB1|TCF21|TEK|TGFBR2|TGFBR3|TLR4|TYROBP|ZFP36|ZBTB16|IL18R1|CD83|KLF4|CD101|ITM2A|RASSF2|KLF2|LILRB3|CLEC4E|CLDN18|KLF13|SNRK|PREX1|SLC46A2|WDR78|DCSTAMP|JAM3|UBASH3B|WNT3A|RASGRP4|TM…
GO:0050673	2.78691e-07	1	44	343	epithelial cell proliferation	BP	1.99896e-05	94|650|659|687|728|857|858|947|1012|1030|1361|1910|1960|2247|2263|2277|2697|2719|3164|3202|3373|3569|3851|5155|6347|6369|6387|7010|7049|7051|7128|7538|8013|8742|9037|28984|51092|54959|55679|58189|84913|89780|120425|168667	ACVRL1|BMP2|BMPR2|KLF9|C5AR1|CAV1|CAV2|CD34|CDH13|CDKN2B|CPB2|EDNRB|EGR3|FGF2|FGFR2|VEGFD|GJA1|GPC3|NR4A1|HOXA5|HYAL1|IL6|KRT4|PDGFB|CCL2|CCL24|CXCL12|TEK|TGFBR3|TGM1|TNFAIP3|ZFP36|NR4A3|TNFSF12|SEMA5A|RGCC|SIDT2|ODAM|LIMS2|WFDC1|ATOH8|WNT3A|JAML|BMPER
GO:0045597	2.82826e-07	1	84	843	positive regulation of cell differentiation	BP	2.01039e-05	94|177|185|322|627|650|659|695|947|948|1003|1268|1440|1490|1524|1601|1906|1960|2022|2247|2353|2621|2624|2627|2852|3071|3084|3142|3202|3400|3491|3569|3575|3727|4023|4481|4915|4921|5196|5320|5468|5789|6092|6387|6886|6910|6925|6935|7048|7122|7538|7704|8654|9021|9037|9308|9353|9398|9638|9839|10266|11197|27063|28984|30846|51393|55273|57580|64321|65009|79625|81501|84913|85358|89780|90527|91663|133522|1…	ACVRL1|AGER|AGTR1|APBB1|BDNF|BMP2|BMPR2|BTK|CD34|CD36|CDH5|CNR1|CSF3|CTGF|CX3CR1|DAB2|EDN1|EGR3|ENG|FGF2|FOS|GAS6|GATA2|GATA6|GPER1|NCKAP1L|NRG1|HLX|HOXA5|ID4|CYR61|IL6|IL7R|JUND|LPL|MSR1|NTRK2|DDR2|PF4|PLA2G2A|PPARG|PTPRD|ROBO2|CXCL12|TAL1|TBX5|TCF4|ZEB1|TGFBR2|CLDN5|ZFP36|ZBTB16|PDE5A|SOCS3|SEMA5A|CD83|SLIT2|CD101|FEZ1|ZEB2|RAMP2|WIF1|ANKRD1|RGCC|EHD2|TRPV2|TMEM100|PREX1|SOX17|NDRG4|NDNF|DCSTAM…
GO:0043085	2.8288e-07	1	136	1594	positive regulation of catalytic activity	BP	2.01039e-05	2|153|154|177|185|186|216|241|284|341|395|408|482|554|650|728|857|858|894|1285|1326|1490|1636|1839|1901|1906|2013|2192|2247|2263|2264|2268|2357|2549|2621|2674|2690|2852|3071|3084|3316|3491|3553|3563|3568|4616|4883|4921|5023|5155|5319|5322|5468|5581|5588|5739|5923|6283|6347|6358|6368|6369|6401|6556|6622|6711|7010|7048|7099|7466|8322|8654|8698|8787|9314|9365|9411|9459|9535|9647|9732|9754|9770|9839|…	A2M|ADRB1|ADRB2|AGER|AGTR1|AGTR2|ALDH1A1|ALOX5AP|ANGPT1|APOC1|ARHGAP6|ARRB1|ATP1B2|AVPR2|BMP2|C5AR1|CAV1|CAV2|CCND2|COL4A3|MAP3K8|CTGF|ACE|HBEGF|S1PR1|EDN1|EMP2|FBLN1|FGF2|FGFR2|FGFR4|FGR|FPR1|GAB1|GAS6|GFRA1|GHR|GPER1|NCKAP1L|NRG1|HSPB2|CYR61|IL1B|IL3RA|IL5RA|GADD45B|NPR3|DDR2|P2RX1|PDGFB|PLA2G1B|PLA2G5|PPARG|PRKCE|PRKCQ|PTGIR|RASGRF1|S100A12|CCL2|CCL14|CCL23|CCL24|SELE|SLC11A1|SNCA|SPTBN1|TEK|T…
GO:0030155	2.98757e-07	1	68	645	regulation of cell adhesion	BP	2.11353e-05	94|177|246|284|395|650|683|857|948|1012|1178|1326|1842|1901|1960|2013|2192|2294|2615|2824|3071|3133|3142|3373|3491|3553|3569|3575|4008|5295|5581|5588|5592|5800|6347|6387|6441|6693|6935|7010|7048|7356|7402|7704|8013|8322|8613|8654|9037|9308|9314|9647|9806|10395|11326|25890|28984|51744|57580|57864|58494|79625|84959|89780|90102|91663|140706|255743	ACVRL1|AGER|ALOX15|ANGPT1|ARHGAP6|BMP2|BST1|CAV1|CD36|CDH13|CLC|MAP3K8|ECM2|S1PR1|EGR3|EMP2|FBLN1|FOXF1|LRRC32|GPM6B|NCKAP1L|HLA-E|HLX|HYAL1|CYR61|IL1B|IL6|IL7R|LMO7|PIK3R1|PRKCE|PRKCQ|PRKG1|PTPRO|CCL2|CXCL12|SFTPD|SPN|ZEB1|TEK|TGFBR2|SCGB1A1|UTRN|ZBTB16|NR4A3|FZD4|PLPP3|PDE5A|SEMA5A|CD83|KLF4|PPM1F|SPOCK2|DLC1|VSIG4|ABI3BP|RGCC|CD244|PREX1|SLC46A2|JAM2|NDNF|UBASH3B|WNT3A|PHLDB2|MYADM|CCM2L|NPNT
GO:0048660	3.09194e-07	1	22	113	regulation of smooth muscle cell proliferation	BP	2.16892e-05	1012|1264|1839|1901|1906|2263|2852|3569|4881|4883|4969|5155|5468|5739|7048|7128|8013|9314|10203|56729|57447|65009	CDH13|CNN1|HBEGF|S1PR1|EDN1|FGFR2|GPER1|IL6|NPR1|NPR3|OGN|PDGFB|PPARG|PTGIR|TGFBR2|TNFAIP3|NR4A3|KLF4|CALCRL|RETN|NDRG2|NDRG4
GO:0016192	3.09386e-07	1	157	1908	vesicle-mediated transport	BP	2.16892e-05	2|154|240|246|284|306|341|408|683|695|710|728|820|847|857|858|945|948|968|976|1012|1511|1536|1601|1675|1808|2013|2040|2157|2159|2171|2207|2214|2215|2219|2268|2277|2294|2352|2357|2358|2621|2624|2690|2719|2890|3039|3040|3043|3055|3071|3101|3553|3577|3579|3949|3953|3988|4311|4332|4360|4481|4628|4973|5023|5155|5168|5175|5196|5199|5295|5468|5473|5581|5627|5787|5806|6283|6347|6401|6403|6414|6441|6456|6…	A2M|ADRB2|ALOX5|ALOX15|ANGPT1|ANXA3|APOC1|ARRB1|BST1|BTK|SERPING1|C5AR1|CAMP|CAT|CAV1|CAV2|CD33|CD36|CD68|ADGRE5|CDH13|CTSG|CYBB|DAB2|CFD|DPYSL2|EMP2|STOM|F8|F10|FABP5|FCER1G|FCGR3A|FCGR3B|FCN1|FGR|VEGFD|FOXF1|FOLR3|FPR1|FPR2|GAS6|GATA2|GHR|GPC3|GRIA1|HBA1|HBA2|HBB|HCK|NCKAP1L|HK3|IL1B|CXCR1|CXCR2|LDLR|LEPR|LIPA|MME|MNDA|MRC1|MSR1|MYH10|OLR1|P2RX1|PDGFB|ENPP2|PECAM1|PF4|CFP|PIK3R1|PPARG|PPBP|PRKC…
GO:0001936	3.29562e-07	1	20	97	regulation of endothelial cell proliferation	BP	2.29996e-05	94|650|659|857|858|1012|1960|2247|2277|2697|3164|5155|6347|6369|6387|7010|8742|9037|28984|84913	ACVRL1|BMP2|BMPR2|CAV1|CAV2|CDH13|EGR3|FGF2|VEGFD|GJA1|NR4A1|PDGFB|CCL2|CCL24|CXCL12|TEK|TNFSF12|SEMA5A|RGCC|ATOH8
GO:0050920	3.5978e-07	1	27	172	regulation of chemotaxis	BP	2.49519e-05	177|659|683|728|1012|1901|1906|2247|2277|2621|2920|2921|3071|3569|5155|5196|5473|5800|6092|6347|6387|9037|9353|9647|23604|83700|89780	AGER|BMPR2|BST1|C5AR1|CDH13|S1PR1|EDN1|FGF2|VEGFD|GAS6|CXCL2|CXCL3|NCKAP1L|IL6|PDGFB|PF4|PPBP|PTPRO|ROBO2|CCL2|CXCL12|SEMA5A|SLIT2|PPM1F|DAPK2|JAM3|WNT3A
GO:1902533	3.60758e-07	1	85	901	positive regulation of intracellular signal transduction	BP	2.49519e-05	153|154|177|246|284|408|650|728|847|857|858|948|1012|1326|1440|1490|1634|1839|1906|2159|2247|2263|2264|2268|2357|2549|2621|2690|2697|2828|2852|3084|3553|3569|4616|4915|5028|5155|5196|5319|5320|5322|5414|5581|5739|5923|6283|6347|6358|6368|6369|6403|7010|7099|8322|8654|8809|9002|9021|9037|9365|9770|9839|10174|23328|23533|27063|29995|51196|53832|57158|65009|80833|114898|115727|120892|152007|152831|1…	ADRB1|ADRB2|AGER|ALOX15|ANGPT1|ARRB1|BMP2|C5AR1|CAT|CAV1|CAV2|CD36|CDH13|MAP3K8|CSF3|CTGF|DCN|HBEGF|EDN1|F10|FGF2|FGFR2|FGFR4|FGR|FPR1|GAB1|GAS6|GHR|GJA1|GPR4|GPER1|NRG1|IL1B|IL6|GADD45B|NTRK2|P2RY1|PDGFB|PF4|PLA2G1B|PLA2G2A|PLA2G5|SEPT4|PRKCE|PTGIR|RASGRF1|S100A12|CCL2|CCL14|CCL23|CCL24|SELP|TEK|TLR4|FZD4|PDE5A|IL18R1|F2RL3|SOCS3|SEMA5A|KL|RASSF2|ZEB2|SORBS3|SASH1|PIK3R5|ANKRD1|LMCD1|PLCE1|IL20R…
GO:0009887	3.68061e-07	1	93	976	animal organ morphogenesis	BP	2.53438e-05	94|104|186|358|650|659|857|947|1305|1361|1490|1601|1634|1901|1906|2022|2078|2202|2247|2263|2273|2294|2313|2624|2627|2702|2719|3084|3142|3202|3340|3373|3400|3491|3569|4091|4211|4638|4915|4919|5950|6347|6532|6586|6909|6910|6926|6935|6943|7010|7048|7049|7122|7128|7134|8013|8322|8516|9496|9510|10395|10908|23287|23493|23554|25928|27063|51301|54345|54959|55084|55273|55679|57493|57556|59277|64321|64399|…	ACVRL1|ADARB1|AGTR2|AQP1|BMP2|BMPR2|CAV1|CD34|COL13A1|CPB2|CTGF|DAB2|DCN|S1PR1|EDN1|ENG|ERG|EFEMP1|FGF2|FGFR2|FHL1|FOXF1|FLI1|GATA2|GATA6|GJA5|GPC3|NRG1|HLX|HOXA5|NDST1|HYAL1|ID4|CYR61|IL6|SMAD6|MEIS1|MYLK|NTRK2|ROR1|RBP4|CCL2|SLC6A4|SLIT3|TBX2|TBX5|TBX3|ZEB1|TCF21|TEK|TGFBR2|TGFBR3|CLDN5|TNFAIP3|TNNC1|NR4A3|FZD4|ITGA8|TBX4|ADAMTS1|DLC1|PNPLA6|AGTPBP1|HEY2|TSPAN12|SOSTDC1|ANKRD1|GCNT4|SOX18|ODAM|…
GO:0048738	3.77087e-07	1	30	186	cardiac muscle tissue development	BP	2.58505e-05	186|650|1901|1906|2022|2247|2263|2627|2697|2702|3084|4628|4629|5950|6445|6909|6910|6926|7048|7049|7134|10529|23493|27063|57158|57493|65009|89780|91624|140706	AGTR2|BMP2|S1PR1|EDN1|ENG|FGF2|FGFR2|GATA6|GJA1|GJA5|NRG1|MYH10|MYH11|RBP4|SGCG|TBX2|TBX5|TBX3|TGFBR2|TGFBR3|TNNC1|NEBL|HEY2|ANKRD1|JPH2|HEG1|NDRG4|WNT3A|NEXN|CCM2L
GO:0065007	3.97038e-07	1	711	11552	biological regulation	BP	2.70983e-05	2|32|33|94|104|153|154|177|181|185|186|187|216|241|246|284|306|322|341|358|361|366|395|408|467|477|482|554|590|597|627|650|659|660|667|683|687|695|710|712|713|714|728|729|730|732|745|820|845|847|857|858|894|945|947|948|976|1003|1012|1030|1036|1043|1073|1178|1262|1264|1268|1271|1285|1316|1318|1326|1359|1361|1410|1440|1473|1490|1511|1524|1536|1601|1602|1634|1636|1674|1675|1805|1808|1827|1839|1842|1…	A2M|ACACB|ACADL|ACVRL1|ADARB1|ADRB1|ADRB2|AGER|AGRP|AGTR1|AGTR2|APLNR|ALDH1A1|ALOX5AP|ALOX15|ANGPT1|ANXA3|APBB1|APOC1|AQP1|AQP4|AQP9|ARHGAP6|ARRB1|ATF3|ATP1A2|ATP1B2|AVPR2|BCHE|BCL2A1|BDNF|BMP2|BMPR2|BMX|DST|BST1|KLF9|BTK|SERPING1|C1QA|C1QB|C1QC|C5AR1|C6|C7|C8B|MYRF|CAMP|CASQ2|CAT|CAV1|CAV2|CCND2|CD33|CD34|CD36|ADGRE5|CDH5|CDH13|CDKN2B|CDO1|CD52|CFL2|CLC|CNGA4|CNN1|CNR1|CNTFR|COL4A3|KLF6|SLC31A2|…
GO:0051247	4.27373e-07	1	128	1524	positive regulation of protein metabolic process	BP	2.90407e-05	94|154|177|185|186|246|284|408|554|650|659|728|729|857|858|894|948|1285|1326|1440|1490|1536|1601|1636|1839|1906|1910|1958|2013|2022|2192|2247|2263|2264|2357|2549|2621|2662|2690|2697|2719|2852|3071|3084|3491|3553|3569|4616|4915|4921|5023|5028|5155|5168|5319|5320|5322|5414|5468|5581|5588|6283|6347|6358|6368|6369|6556|6622|6693|7010|7044|7048|7099|7123|7128|7466|8322|8613|8654|8742|9021|9314|9365|96…	ACVRL1|ADRB2|AGER|AGTR1|AGTR2|ALOX15|ANGPT1|ARRB1|AVPR2|BMP2|BMPR2|C5AR1|C6|CAV1|CAV2|CCND2|CD36|COL4A3|MAP3K8|CSF3|CTGF|CYBB|DAB2|ACE|HBEGF|EDN1|EDNRB|EGR1|EMP2|ENG|FBLN1|FGF2|FGFR2|FGFR4|FPR1|GAB1|GAS6|GDF10|GHR|GJA1|GPC3|GPER1|NCKAP1L|NRG1|CYR61|IL1B|IL6|GADD45B|NTRK2|DDR2|P2RX1|P2RY1|PDGFB|ENPP2|PLA2G1B|PLA2G2A|PLA2G5|SEPT4|PPARG|PRKCE|PRKCQ|S100A12|CCL2|CCL14|CCL23|CCL24|SLC11A1|SNCA|SPN|TEK…
GO:0050921	4.73418e-07	1	22	127	positive regulation of chemotaxis	BP	3.20291e-05	177|659|728|1012|1901|1906|2247|2277|2621|2920|2921|3071|3569|5155|5196|5473|6347|6387|9037|9353|9647|23604	AGER|BMPR2|C5AR1|CDH13|S1PR1|EDN1|FGF2|VEGFD|GAS6|CXCL2|CXCL3|NCKAP1L|IL6|PDGFB|PF4|PPBP|CCL2|CXCL12|SEMA5A|SLIT2|PPM1F|DAPK2
GO:0050789	4.89031e-07	1	677	10930	regulation of biological process	BP	3.29415e-05	2|32|33|94|104|153|154|177|181|185|186|187|246|284|306|322|341|358|395|408|467|477|482|554|590|597|627|650|659|660|667|683|687|695|710|712|713|714|728|729|730|732|745|820|845|847|857|858|894|945|947|948|976|1003|1012|1030|1073|1178|1264|1268|1271|1285|1316|1318|1326|1359|1361|1410|1440|1473|1490|1511|1524|1536|1601|1602|1634|1636|1674|1675|1805|1808|1827|1839|1842|1843|1850|1901|1906|1910|1958|19…	A2M|ACACB|ACADL|ACVRL1|ADARB1|ADRB1|ADRB2|AGER|AGRP|AGTR1|AGTR2|APLNR|ALOX15|ANGPT1|ANXA3|APBB1|APOC1|AQP1|ARHGAP6|ARRB1|ATF3|ATP1A2|ATP1B2|AVPR2|BCHE|BCL2A1|BDNF|BMP2|BMPR2|BMX|DST|BST1|KLF9|BTK|SERPING1|C1QA|C1QB|C1QC|C5AR1|C6|C7|C8B|MYRF|CAMP|CASQ2|CAT|CAV1|CAV2|CCND2|CD33|CD34|CD36|ADGRE5|CDH5|CDH13|CDKN2B|CFL2|CLC|CNN1|CNR1|CNTFR|COL4A3|KLF6|SLC31A2|MAP3K8|CPA3|CPB2|CRYAB|CSF3|CST5|CTGF|CTSG…
GO:1902622	4.95927e-07	1	11	35	regulation of neutrophil migration	BP	3.32615e-05	683|728|1906|2920|2921|3071|5196|5473|9353|23604|83700	BST1|C5AR1|EDN1|CXCL2|CXCL3|NCKAP1L|PF4|PPBP|SLIT2|DAPK2|JAM3
GO:0048659	5.15729e-07	1	22	116	smooth muscle cell proliferation	BP	3.44405e-05	1012|1264|1839|1901|1906|2263|2852|3569|4881|4883|4969|5155|5468|5739|7048|7128|8013|9314|10203|56729|57447|65009	CDH13|CNN1|HBEGF|S1PR1|EDN1|FGFR2|GPER1|IL6|NPR1|NPR3|OGN|PDGFB|PPARG|PTGIR|TGFBR2|TNFAIP3|NR4A3|KLF4|CALCRL|RETN|NDRG2|NDRG4
GO:0051271	5.30604e-07	1	35	243	negative regulation of cellular component movement	BP	3.52817e-05	94|104|186|1524|1602|1634|2022|2192|2247|3036|3084|4223|5734|5800|6237|6347|6387|6910|7049|7075|8434|9037|9314|9353|10395|28984|64411|65009|79812|80031|89780|90102|90627|90865|286205	ACVRL1|ADARB1|AGTR2|CX3CR1|DACH1|DCN|ENG|FBLN1|FGF2|HAS1|NRG1|MEOX2|PTGER4|PTPRO|RRAS|CCL2|CXCL12|TBX5|TGFBR3|TIE1|RECK|SEMA5A|KLF4|SLIT2|DLC1|RGCC|ARAP3|NDRG4|MMRN2|SEMA6D|WNT3A|PHLDB2|STARD13|IL33|SCAI
GO:0032102	5.5396e-07	1	35	254	negative regulation of response to external stimulus	BP	3.66774e-05	177|710|947|1361|1524|1906|2160|2247|2294|2697|2852|5155|5468|5592|5627|5734|5740|5800|6092|6347|6693|7010|7056|7128|9021|9037|9314|9353|10203|25959|58189|84959|89780|90102|338557	AGER|SERPING1|CD34|CPB2|CX3CR1|EDN1|F11|FGF2|FOXF1|GJA1|GPER1|PDGFB|PPARG|PRKG1|PROS1|PTGER4|PTGIS|PTPRO|ROBO2|CCL2|SPN|TEK|THBD|TNFAIP3|SOCS3|SEMA5A|KLF4|SLIT2|CALCRL|KANK2|WFDC1|UBASH3B|WNT3A|PHLDB2|FFAR4
GO:1902531	5.60336e-07	1	143	1719	regulation of intracellular signal transduction	BP	3.69417e-05	2|153|154|177|246|284|395|408|467|650|683|728|845|847|857|858|948|1012|1326|1440|1490|1634|1827|1839|1843|1850|1906|2159|2192|2203|2247|2263|2264|2268|2357|2549|2621|2662|2690|2697|2828|2852|3084|3491|3553|3569|4616|4915|5028|5155|5196|5295|5319|5320|5322|5414|5581|5739|5923|6237|6283|6347|6358|6368|6369|6387|6403|6425|7010|7044|7078|7099|7128|7466|7957|8322|8395|8654|8809|8835|8994|9002|9021|903…	A2M|ADRB1|ADRB2|AGER|ALOX15|ANGPT1|ARHGAP6|ARRB1|ATF3|BMP2|BST1|C5AR1|CASQ2|CAT|CAV1|CAV2|CD36|CDH13|MAP3K8|CSF3|CTGF|DCN|RCAN1|HBEGF|DUSP1|DUSP8|EDN1|F10|FBLN1|FBP1|FGF2|FGFR2|FGFR4|FGR|FPR1|GAB1|GAS6|GDF10|GHR|GJA1|GPR4|GPER1|NRG1|CYR61|IL1B|IL6|GADD45B|NTRK2|P2RY1|PDGFB|PF4|PIK3R1|PLA2G1B|PLA2G2A|PLA2G5|SEPT4|PRKCE|PTGIR|RASGRF1|RRAS|S100A12|CCL2|CCL14|CCL23|CCL24|CXCL12|SELP|SFRP5|TEK|LEFTY2|…
GO:0045926	5.68754e-07	1	32	221	negative regulation of growth	BP	3.73377e-05	94|153|154|186|322|659|820|948|1410|1511|2203|2273|2697|2719|3373|4499|4881|5468|5950|6532|6586|6910|7048|9037|9353|56920|58189|64321|80014|81501|85407|89780	ACVRL1|ADRB1|ADRB2|AGTR2|APBB1|BMPR2|CAMP|CD36|CRYAB|CTSG|FBP1|FHL1|GJA1|GPC3|HYAL1|MT1M|NPR1|PPARG|RBP4|SLC6A4|SLIT3|TBX5|TGFBR2|SEMA5A|SLIT2|SEMA3G|WFDC1|SOX17|WWC2|DCSTAMP|NKD1|WNT3A
GO:0002237	6.16852e-07	1	40	319	response to molecule of bacterial origin	BP	4.03244e-05	728|948|1268|1440|1511|1524|1634|1906|1910|2353|2697|2920|2921|3055|3553|3569|3727|4129|4360|5196|5473|5581|5734|5737|5739|6347|6401|6403|6556|6590|6622|7056|7099|7128|7356|7538|9450|23328|27063|57088	C5AR1|CD36|CNR1|CSF3|CTSG|CX3CR1|DCN|EDN1|EDNRB|FOS|GJA1|CXCL2|CXCL3|HCK|IL1B|IL6|JUND|MAOB|MRC1|PF4|PPBP|PRKCE|PTGER4|PTGFR|PTGIR|CCL2|SELE|SELP|SLC11A1|SLPI|SNCA|THBD|TLR4|TNFAIP3|SCGB1A1|ZFP36|LY86|SASH1|ANKRD1|PLSCR4
GO:0002673	6.6733e-07	1	16	71	regulation of acute inflammatory response	BP	4.34409e-05	2|695|710|728|729|730|732|1268|1910|2207|3553|3569|5199|5468|5627|6693	A2M|BTK|SERPING1|C5AR1|C6|C7|C8B|CNR1|EDNRB|FCER1G|IL1B|IL6|CFP|PPARG|PROS1|SPN
GO:0035295	7.52382e-07	1	63	573	tube development	BP	4.87726e-05	94|186|650|659|847|1490|1906|1910|2022|2034|2247|2263|2294|2624|2627|2702|2719|3142|3202|3988|4091|4093|4855|5251|5950|6092|6425|6441|6909|6910|6926|6935|6943|7048|8013|9353|9496|9839|10365|10395|10630|25928|51208|54345|54922|57493|64321|64399|64759|65009|79192|79633|84913|89780|90627|140628|144165|168667|200894|255743|340419|389119|441376	ACVRL1|AGTR2|BMP2|BMPR2|CAT|CTGF|EDN1|EDNRB|ENG|EPAS1|FGF2|FGFR2|FOXF1|GATA2|GATA6|GJA5|GPC3|HLX|HOXA5|LIPA|SMAD6|SMAD9|NOTCH4|PHEX|RBP4|ROBO2|SFRP5|SFTPD|TBX2|TBX5|TBX3|ZEB1|TCF21|TGFBR2|NR4A3|SLIT2|TBX4|ZEB2|KLF2|DLC1|PDPN|SOSTDC1|CLDN18|SOX18|RASIP1|HEG1|SOX17|HHIP|TNS3|NDRG4|IRX1|FAT4|ATOH8|WNT3A|STARD13|GATA5|PRICKLE1|BMPER|ARL13B|NPNT|RSPO2|FAM212A|AARD
GO:0060419	7.55797e-07	1	17	73	heart growth	BP	4.87898e-05	32|186|1901|1906|2247|2263|2627|2697|5950|6909|6910|7048|7049|23493|57493|65009|140706	ACACB|AGTR2|S1PR1|EDN1|FGF2|FGFR2|GATA6|GJA1|RBP4|TBX2|TBX5|TGFBR2|TGFBR3|HEY2|HEG1|NDRG4|CCM2L
GO:0035265	8.57407e-07	1	25	143	organ growth	BP	5.51195e-05	32|186|1901|1906|2247|2263|2627|2697|3142|3953|4921|5950|6532|6909|6910|7048|7049|9254|23493|26524|57493|65009|80014|140706|340419	ACACB|AGTR2|S1PR1|EDN1|FGF2|FGFR2|GATA6|GJA1|HLX|LEPR|DDR2|RBP4|SLC6A4|TBX2|TBX5|TGFBR2|TGFBR3|CACNA2D2|HEY2|LATS2|HEG1|NDRG4|WWC2|CCM2L|RSPO2
GO:0002520	8.99161e-07	1	78	803	immune system development	BP	5.75649e-05	177|284|660|695|714|947|1030|1178|1316|1440|1636|1958|1960|2009|2034|2207|2263|2313|2353|2621|2624|2719|3071|3142|3202|3569|3575|3953|4211|4222|4242|4855|5153|5196|5295|5468|5734|6237|6688|6693|6886|6935|6943|7010|7048|7049|7099|7128|7305|7538|7704|8809|9308|9314|9398|9452|9770|10365|11025|26253|51208|51621|54861|57580|57864|79819|81501|83700|84959|89780|115727|130733|133522|139818|146433|147744|…	AGER|ANGPT1|BMX|BTK|C1QC|CD34|CDKN2B|CLC|KLF6|CSF3|ACE|EGR1|EGR3|EML1|EPAS1|FCER1G|FGFR2|FLI1|FOS|GAS6|GATA2|GPC3|NCKAP1L|HLX|HOXA5|IL6|IL7R|LEPR|MEIS1|MEOX1|MFNG|NOTCH4|PDE1B|PF4|PIK3R1|PPARG|PTGER4|RRAS|SPI1|SPN|TAL1|ZEB1|TCF21|TEK|TGFBR2|TGFBR3|TLR4|TNFAIP3|TYROBP|ZFP36|ZBTB16|IL18R1|CD83|KLF4|CD101|ITM2A|RASSF2|KLF2|LILRB3|CLEC4E|CLDN18|KLF13|SNRK|PREX1|SLC46A2|WDR78|DCSTAMP|JAM3|UBASH3B|WNT3…
GO:0048468	9.09917e-07	1	158	1894	cell development	BP	5.80138e-05	104|177|186|322|627|650|659|695|745|845|858|1003|1073|1268|1524|1776|1808|1906|1910|1959|2022|2034|2115|2192|2263|2313|2549|2624|2662|2674|2697|2823|2828|2852|3071|3084|3202|3400|3553|3569|3727|3730|4211|4628|4629|4855|4915|4919|4969|4974|5138|5155|5295|5376|5414|5468|5588|5592|5745|5789|5800|5923|5990|6092|6383|6387|6445|6446|6456|6532|6586|6711|6886|6925|6926|6935|7010|7044|7048|7049|7099|7111|…	ADARB1|AGER|AGTR2|APBB1|BDNF|BMP2|BMPR2|BTK|MYRF|CASQ2|CAV2|CDH5|CFL2|CNR1|CX3CR1|DNASE1L3|DPYSL2|EDN1|EDNRB|EGR2|ENG|EPAS1|ETV1|FBLN1|FGFR2|FLI1|GAB1|GATA2|GDF10|GFRA1|GJA1|GPM6A|GPR4|GPER1|NCKAP1L|NRG1|HOXA5|ID4|IL1B|IL6|JUND|ANOS1|MEIS1|MYH10|MYH11|NOTCH4|NTRK2|ROR1|OGN|OMG|PDE2A|PDGFB|PIK3R1|PMP22|SEPT4|PPARG|PRKCQ|PRKG1|PTH1R|PTPRD|PTPRO|RASGRF1|RFX2|ROBO2|SDC2|CXCL12|SGCG|SGK1|SH3GL2|SLC6A4…
GO:0050679	9.14973e-07	1	26	161	positive regulation of epithelial cell proliferation	BP	5.8097e-05	94|650|659|728|858|1012|1960|2247|2263|2277|3164|3373|3569|5155|6347|6369|6387|7010|7051|7128|8013|8742|9037|54959|89780|120425	ACVRL1|BMP2|BMPR2|C5AR1|CAV2|CDH13|EGR3|FGF2|FGFR2|VEGFD|NR4A1|HYAL1|IL6|PDGFB|CCL2|CCL24|CXCL12|TEK|TGM1|TNFAIP3|NR4A3|TNFSF12|SEMA5A|ODAM|WNT3A|JAML
GO:0051093	9.84429e-07	1	80	821	negative regulation of developmental process	BP	6.22521e-05	94|153|154|627|650|659|714|857|1285|1361|1634|1910|2192|2202|2621|2624|2662|2697|2828|2852|3084|3142|3202|3400|3569|4211|4223|4855|4881|4974|5155|5196|5295|5376|5468|5800|5950|6092|6347|6425|6532|6909|6910|6926|6935|7010|7048|7075|7099|7538|7704|8994|9037|9314|9353|9619|11025|22899|23493|25928|28984|51208|51621|55679|56920|64321|79812|80014|84959|85407|85458|89780|90102|90627|122953|130733|144165…	ACVRL1|ADRB1|ADRB2|BDNF|BMP2|BMPR2|C1QC|CAV1|COL4A3|CPB2|DCN|EDNRB|FBLN1|EFEMP1|GAS6|GATA2|GDF10|GJA1|GPR4|GPER1|NRG1|HLX|HOXA5|ID4|IL6|MEIS1|MEOX2|NOTCH4|NPR1|OMG|PDGFB|PF4|PIK3R1|PMP22|PPARG|PTPRO|RBP4|ROBO2|CCL2|SFRP5|SLC6A4|TBX2|TBX5|TBX3|ZEB1|TEK|TGFBR2|TIE1|TLR4|ZFP36|ZBTB16|LIMD1|SEMA5A|KLF4|SLIT2|ABCG1|LILRB3|ARHGEF15|HEY2|SOSTDC1|RGCC|CLDN18|KLF13|LIMS2|SEMA3G|SOX17|MMRN2|WWC2|UBASH3B|NK…
GO:0000902	9.96386e-07	1	89	899	cell morphogenesis	BP	6.2752e-05	104|322|627|659|1808|1959|2115|2192|2263|2268|2549|2674|2697|2823|3055|3084|3569|3575|3730|3988|4628|4855|4915|4969|4974|5168|5295|5588|5789|5800|6092|6347|6369|6383|6387|6446|6456|6586|6711|6886|7010|7940|8013|8322|8516|8994|9037|9046|9353|9638|9839|9912|10129|10319|10365|10395|10630|10763|10810|22854|23237|23767|26084|26524|51092|51393|53358|54873|55698|56920|57381|57493|57556|57580|59277|64321…	ADARB1|APBB1|BDNF|BMPR2|DPYSL2|EGR2|ETV1|FBLN1|FGFR2|FGR|GAB1|GFRA1|GJA1|GPM6A|HCK|NRG1|IL6|IL7R|ANOS1|LIPA|MYH10|NOTCH4|NTRK2|OGN|OMG|ENPP2|PIK3R1|PRKCQ|PTPRD|PTPRO|ROBO2|CCL2|CCL24|SDC2|CXCL12|SGK1|SH3GL2|SLIT3|SPTBN1|TAL1|TEK|LST1|NR4A3|FZD4|ITGA8|LIMD1|SEMA5A|DOK2|SLIT2|FEZ1|ZEB2|ARHGAP44|FRY|LAMC3|KLF2|DLC1|PDPN|NES|WASF3|NTNG1|ARC|FLRT3|ARHGEF26|LATS2|SIDT2|TRPV2|SHC3|PALMD|RADIL|SEMA3G|RHO…
GO:0009617	1.10052e-06	1	55	545	response to bacterium	BP	6.90295e-05	306|728|820|857|948|1268|1440|1511|1524|1634|1906|1910|2207|2268|2353|2697|2920|2921|3055|3133|3553|3569|3727|4129|4360|5196|5199|5319|5320|5473|5581|5734|5737|5739|6283|6347|6401|6403|6441|6556|6590|6622|6693|7056|7099|7128|7356|7538|9450|23328|26253|27063|57088|58484|128488	ANXA3|C5AR1|CAMP|CAV1|CD36|CNR1|CSF3|CTSG|CX3CR1|DCN|EDN1|EDNRB|FCER1G|FGR|FOS|GJA1|CXCL2|CXCL3|HCK|HLA-E|IL1B|IL6|JUND|MAOB|MRC1|PF4|CFP|PLA2G1B|PLA2G2A|PPBP|PRKCE|PTGER4|PTGFR|PTGIR|S100A12|CCL2|SELE|SELP|SFTPD|SLC11A1|SLPI|SNCA|SPN|THBD|TLR4|TNFAIP3|SCGB1A1|ZFP36|LY86|SASH1|CLEC4E|ANKRD1|PLSCR4|NLRC4|WFDC12
GO:0001938	1.13027e-06	1	16	70	positive regulation of endothelial cell proliferation	BP	7.061e-05	94|650|659|858|1012|1960|2247|2277|3164|5155|6347|6369|6387|7010|8742|9037	ACVRL1|BMP2|BMPR2|CAV2|CDH13|EGR3|FGF2|VEGFD|NR4A1|PDGFB|CCL2|CCL24|CXCL12|TEK|TNFSF12|SEMA5A
GO:0055017	1.15284e-06	1	16	67	cardiac muscle tissue growth	BP	7.17307e-05	186|1901|1906|2247|2263|2627|2697|5950|6909|6910|7048|7049|23493|57493|65009|140706	AGTR2|S1PR1|EDN1|FGF2|FGFR2|GATA6|GJA1|RBP4|TBX2|TBX5|TGFBR2|TGFBR3|HEY2|HEG1|NDRG4|CCM2L
GO:0098609	1.22103e-06	1	78	785	cell-cell adhesion	BP	7.56696e-05	177|246|650|857|947|1003|1012|1178|1305|1326|1960|2294|2615|2621|2995|3043|3071|3133|3142|3384|3491|3553|3569|3575|5010|5098|5295|5588|5592|5789|6092|6347|6387|6401|6403|6404|6441|6614|6693|6935|7048|7122|7356|7704|8013|8516|8613|8654|9308|9314|10398|10630|11326|22918|23705|23767|27253|28984|29091|51208|51294|51744|55679|56099|57864|58494|79633|83700|84959|89780|90952|91663|120425|140706|222256|2…	AGER|ALOX15|BMP2|CAV1|CD34|CDH5|CDH13|CLC|COL13A1|MAP3K8|EGR3|FOXF1|LRRC32|GAS6|GYPC|HBB|NCKAP1L|HLA-E|HLX|ICAM2|CYR61|IL1B|IL6|IL7R|CLDN11|PCDHGC3|PIK3R1|PRKCQ|PRKG1|PTPRD|ROBO2|CCL2|CXCL12|SELE|SELP|SELPLG|SFTPD|SIGLEC1|SPN|ZEB1|TGFBR2|CLDN5|SCGB1A1|ZBTB16|NR4A3|ITGA8|PLPP3|PDE5A|CD83|KLF4|MYL9|PDPN|VSIG4|CD93|CADM1|FLRT3|PCDH17|RGCC|STXBP6|CLDN18|PCDH12|CD244|LIMS2|PCDHGB7|SLC46A2|JAM2|FAT4|JA…
GO:0050764	1.4446e-06	1	15	65	regulation of phagocytosis	BP	8.9168e-05	246|948|2207|2268|2621|2624|3055|3071|3553|5468|5806|6347|6441|6556|146722	ALOX15|CD36|FCER1G|FGR|GAS6|GATA2|HCK|NCKAP1L|IL1B|PPARG|PTX3|CCL2|SFTPD|SLC11A1|CD300LF
GO:0071622	1.65135e-06	1	12	48	regulation of granulocyte chemotaxis	BP	0.000101525	683|728|1906|2920|2921|3071|5196|5473|6347|9353|23604|83700	BST1|C5AR1|EDN1|CXCL2|CXCL3|NCKAP1L|PF4|PPBP|CCL2|SLIT2|DAPK2|JAM3
GO:0031032	1.71341e-06	0.999999	27	165	actomyosin structure organization	BP	0.000104924	395|408|845|1073|1264|1490|1901|1906|2037|4628|4629|5295|5734|7111|9647|10174|10395|10529|10580|22899|22998|27063|28984|58529|90102|221692|257019	ARHGAP6|ARRB1|CASQ2|CFL2|CNN1|CTGF|S1PR1|EDN1|EPB41L2|MYH10|MYH11|PIK3R1|PTGER4|TMOD1|PPM1F|SORBS3|DLC1|NEBL|SORBS1|ARHGEF15|LIMCH1|ANKRD1|RGCC|MYOZ1|PHLDB2|PHACTR1|FRMD3
GO:0098602	1.76651e-06	0.999999	66	644	single organism cell adhesion	BP	0.000107614	177|246|857|947|1003|1178|1305|1326|1960|2192|2294|2615|2621|3043|3071|3133|3142|3384|3491|3553|3569|3575|5295|5588|5592|6347|6387|6401|6403|6404|6441|6614|6693|6935|7010|7048|7356|7704|8013|8322|8516|8613|8654|9308|9314|10398|10630|11326|22918|28984|51744|55679|55698|57580|57864|58494|79834|83700|84959|89780|90952|91663|140706|255743|257194|342035	AGER|ALOX15|CAV1|CD34|CDH5|CLC|COL13A1|MAP3K8|EGR3|FBLN1|FOXF1|LRRC32|GAS6|HBB|NCKAP1L|HLA-E|HLX|ICAM2|CYR61|IL1B|IL6|IL7R|PIK3R1|PRKCQ|PRKG1|CCL2|CXCL12|SELE|SELP|SELPLG|SFTPD|SIGLEC1|SPN|ZEB1|TEK|TGFBR2|SCGB1A1|ZBTB16|NR4A3|FZD4|ITGA8|PLPP3|PDE5A|CD83|KLF4|MYL9|PDPN|VSIG4|CD93|RGCC|CD244|LIMS2|RADIL|PREX1|SLC46A2|JAM2|PEAK1|JAM3|UBASH3B|WNT3A|ESAM|MYADM|CCM2L|NPNT|NEGR1|GLDN
GO:0061045	1.77122e-06	1	15	64	negative regulation of wound healing	BP	0.000107614	177|710|947|1361|1906|2160|2247|2697|5155|5592|5627|7056|58189|84959|90102	AGER|SERPING1|CD34|CPB2|EDN1|F11|FGF2|GJA1|PDGFB|PRKG1|PROS1|THBD|WFDC1|UBASH3B|PHLDB2
GO:0006936	1.88197e-06	0.999999	41	331	muscle contraction	BP	0.000113896	154|477|845|857|1264|1410|1490|1674|1906|1910|2697|2702|2852|3762|4629|4638|5023|5348|5592|6323|6330|6332|6442|6769|7111|7134|7136|7402|7433|8654|9732|10174|10203|10316|10398|10580|23336|25802|51196|126393|255743	ADRB2|ATP1A2|CASQ2|CAV1|CNN1|CRYAB|CTGF|DES|EDN1|EDNRB|GJA1|GJA5|GPER1|KCNJ5|MYH11|MYLK|P2RX1|FXYD1|PRKG1|SCN1A|SCN4B|SCN7A|SGCA|STAC|TMOD1|TNNC1|TNNI2|UTRN|VIPR1|PDE5A|DOCK4|SORBS3|CALCRL|NMUR1|MYL9|SORBS1|SYNM|LMOD1|PLCE1|HSPB6|NPNT
GO:0001933	1.95107e-06	0.999999	47	396	negative regulation of protein phosphorylation	BP	0.000117618	104|284|408|467|857|1030|1634|1843|1850|2022|2167|2192|2852|3553|3569|4091|4616|6622|7078|7099|7128|8613|8835|8850|9021|9314|9353|9467|9535|9647|9770|11142|23645|23767|26524|55022|55924|57447|57580|64101|80243|83891|84959|91663|94030|120892|389119	ADARB1|ANGPT1|ARRB1|ATF3|CAV1|CDKN2B|DCN|DUSP1|DUSP8|ENG|FABP4|FBLN1|GPER1|IL1B|IL6|SMAD6|GADD45B|SNCA|TIMP3|TLR4|TNFAIP3|PLPP3|SOCS2|KAT2B|SOCS3|KLF4|SLIT2|SH3BP5|GMFG|PPM1F|RASSF2|PKIG|PPP1R15A|FLRT3|LATS2|PID1|FAM212B|NDRG2|PREX1|LRRC4|PREX2|SNX25|UBASH3B|MYADM|LRRC4B|LRRK2|FAM212A
GO:0040013	2.07912e-06	0.999999	35	257	negative regulation of locomotion	BP	0.000124852	94|104|186|1524|1602|1634|2022|2192|2247|3036|3084|4223|5734|5800|6092|6237|6347|6387|6910|7075|8434|9037|9314|9353|10395|28984|64411|65009|79812|80031|89780|90102|90627|90865|286205	ACVRL1|ADARB1|AGTR2|CX3CR1|DACH1|DCN|ENG|FBLN1|FGF2|HAS1|NRG1|MEOX2|PTGER4|PTPRO|ROBO2|RRAS|CCL2|CXCL12|TBX5|TIE1|RECK|SEMA5A|KLF4|SLIT2|DLC1|RGCC|ARAP3|NDRG4|MMRN2|SEMA6D|WNT3A|PHLDB2|STARD13|IL33|SCAI
GO:0002576	2.29943e-06	0.999999	22	130	platelet degranulation	BP	0.000137549	2|710|948|1675|2157|2207|2277|2621|5023|5155|5175|5196|5473|5627|6403|6414|7044|7078|7123|7450|9749|22915	A2M|SERPING1|CD36|CFD|F8|FCER1G|VEGFD|GAS6|P2RX1|PDGFB|PECAM1|PF4|PPBP|PROS1|SELP|SELENOP|LEFTY2|TIMP3|CLEC3B|VWF|PHACTR2|MMRN1
GO:0002684	2.46636e-06	0.999999	90	1012	positive regulation of immune system process	BP	0.000146967	2|177|695|710|712|713|714|728|729|730|732|857|948|1268|1326|1440|1511|1675|1906|1960|2207|2214|2219|2268|2277|2294|2353|2357|2358|2621|2624|2920|2921|3055|3071|3133|3142|3202|3384|3553|3569|3575|4332|5196|5199|5295|5319|5473|5581|5588|5627|5950|6347|6369|6387|6403|6441|6556|6693|6886|7048|7099|7128|7704|8013|8547|8685|9173|9308|9398|9473|11326|23604|23705|26253|28984|51311|51744|58484|81035|81501…	A2M|AGER|BTK|SERPING1|C1QA|C1QB|C1QC|C5AR1|C6|C7|C8B|CAV1|CD36|CNR1|MAP3K8|CSF3|CTSG|CFD|EDN1|EGR3|FCER1G|FCGR3A|FCN1|FGR|VEGFD|FOXF1|FOS|FPR1|FPR2|GAS6|GATA2|CXCL2|CXCL3|HCK|NCKAP1L|HLA-E|HLX|HOXA5|ICAM2|IL1B|IL6|IL7R|MNDA|PF4|CFP|PIK3R1|PLA2G1B|PPBP|PRKCE|PRKCQ|PROS1|RBP4|CCL2|CCL24|CXCL12|SELP|SFTPD|SLC11A1|SPN|TAL1|TGFBR2|TLR4|TNFAIP3|ZBTB16|NR4A3|FCN3|MARCO|IL1RL1|CD83|CD101|THEMIS2|VSIG4|DA…
GO:0001667	2.48663e-06	0.999999	40	316	ameboidal-type cell migration	BP	0.000147606	94|186|284|306|659|1012|1634|1839|1906|1910|1960|2013|2247|3036|3164|3373|4223|4921|5155|5168|5581|7010|7048|7145|8742|9037|9314|9353|9647|9839|23328|28984|54345|64321|79812|84913|90627|152007|154810|168667	ACVRL1|AGTR2|ANGPT1|ANXA3|BMPR2|CDH13|DCN|HBEGF|EDN1|EDNRB|EGR3|EMP2|FGF2|HAS1|NR4A1|HYAL1|MEOX2|DDR2|PDGFB|ENPP2|PRKCE|TEK|TGFBR2|TNS1|TNFSF12|SEMA5A|KLF4|SLIT2|PPM1F|ZEB2|SASH1|RGCC|SOX18|SOX17|MMRN2|ATOH8|STARD13|GLIPR2|AMOTL1|BMPER
GO:0048729	2.76257e-06	0.999999	64	613	tissue morphogenesis	BP	0.000163361	94|104|186|650|659|1601|1839|1901|1906|2022|2247|2263|2294|2719|3084|3202|3400|3491|3569|4638|4855|4919|6886|6909|6910|6926|6943|7048|7049|7134|8013|8322|8516|9021|9314|9353|9496|9839|10395|23493|23767|25928|27063|51301|54345|54922|55273|57493|59277|64321|64399|65009|79192|79633|80144|85407|89780|90102|90627|140706|144165|200894|255743|340419	ACVRL1|ADARB1|AGTR2|BMP2|BMPR2|DAB2|HBEGF|S1PR1|EDN1|ENG|FGF2|FGFR2|FOXF1|GPC3|NRG1|HOXA5|ID4|CYR61|IL6|MYLK|NOTCH4|ROR1|TAL1|TBX2|TBX5|TBX3|TCF21|TGFBR2|TGFBR3|TNNC1|NR4A3|FZD4|ITGA8|SOCS3|KLF4|SLIT2|TBX4|ZEB2|DLC1|HEY2|FLRT3|SOSTDC1|ANKRD1|GCNT4|SOX18|RASIP1|TMEM100|HEG1|NTN4|SOX17|HHIP|NDRG4|IRX1|FAT4|FRAS1|NKD1|WNT3A|PHLDB2|STARD13|CCM2L|PRICKLE1|ARL13B|NPNT|RSPO2
GO:0044092	2.83682e-06	0.999999	95	1094	negative regulation of molecular function	BP	0.000167113	2|32|104|154|177|306|341|358|408|477|710|845|847|857|1030|1268|1285|1473|1601|1634|1843|1850|1910|2167|2621|2719|3071|3553|3569|3730|3953|4616|4883|5028|5155|5468|5581|5627|5740|5806|6368|6425|6590|6622|7078|7128|7356|7466|7538|7881|8434|8639|8835|8850|9021|9314|9353|9467|9535|9647|9749|9806|10129|10763|11142|23493|23645|23767|26524|27074|27151|51232|55118|55924|56849|57580|57718|58189|58484|6410…	A2M|ACACB|ADARB1|ADRB2|AGER|ANXA3|APOC1|AQP1|ARRB1|ATP1A2|SERPING1|CASQ2|CAT|CAV1|CDKN2B|CNR1|COL4A3|CST5|DAB2|DCN|DUSP1|DUSP8|EDNRB|FABP4|GAS6|GPC3|NCKAP1L|IL1B|IL6|ANOS1|LEPR|GADD45B|NPR3|P2RY1|PDGFB|PPARG|PRKCE|PROS1|PTGIS|PTX3|CCL23|SFRP5|SLPI|SNCA|TIMP3|TNFAIP3|SCGB1A1|WFS1|ZFP36|KCNAB1|RECK|AOC3|SOCS2|KAT2B|SOCS3|KLF4|SLIT2|SH3BP5|GMFG|PPM1F|PHACTR2|SPOCK2|FRY|NES|PKIG|HEY2|PPP1R15A|FLRT3|L…
GO:0009893	2.87448e-06	0.999998	229	3114	positive regulation of metabolic process	BP	0.000168691	32|94|153|154|177|185|186|246|284|306|322|341|408|467|554|650|659|728|729|745|857|858|894|947|948|1012|1030|1285|1316|1326|1440|1490|1536|1601|1634|1636|1839|1901|1906|1910|1958|1959|2013|2022|2034|2078|2115|2192|2247|2263|2264|2268|2294|2313|2353|2354|2357|2549|2615|2621|2624|2627|2662|2690|2697|2719|2819|2852|2977|3043|3071|3084|3164|3202|3400|3491|3553|3569|3575|3727|3949|4005|4091|4093|4129|4…	ACACB|ACVRL1|ADRB1|ADRB2|AGER|AGTR1|AGTR2|ALOX15|ANGPT1|ANXA3|APBB1|APOC1|ARRB1|ATF3|AVPR2|BMP2|BMPR2|C5AR1|C6|MYRF|CAV1|CAV2|CCND2|CD34|CD36|CDH13|CDKN2B|COL4A3|KLF6|MAP3K8|CSF3|CTGF|CYBB|DAB2|DCN|ACE|HBEGF|S1PR1|EDN1|EDNRB|EGR1|EGR2|EMP2|ENG|EPAS1|ERG|ETV1|FBLN1|FGF2|FGFR2|FGFR4|FGR|FOXF1|FLI1|FOS|FOSB|FPR1|GAB1|LRRC32|GAS6|GATA2|GATA6|GDF10|GHR|GJA1|GPC3|GPD1|GPER1|GUCY1A2|HBB|NCKAP1L|NRG1|NR4…
GO:0009725	2.91467e-06	0.999999	80	849	response to hormone	BP	0.000170404	21|181|185|186|306|358|477|554|590|687|847|857|858|1036|1490|1536|1601|1843|1906|1958|1959|2022|2353|2354|2549|2627|2690|2697|2791|2852|3164|3553|3569|3727|3953|4005|4129|4327|5166|5251|5295|5319|5468|5581|5588|5734|5737|6092|6258|6347|6387|6586|6751|6943|7010|7048|7049|7356|7538|7832|8013|8835|8850|9021|9353|9365|9619|10266|10580|25959|26524|55022|56729|57658|64397|133522|167465|196883|245972|25…	ABCA3|AGRP|AGTR1|AGTR2|ANXA3|AQP1|ATP1A2|AVPR2|BCHE|KLF9|CAT|CAV1|CAV2|CDO1|CTGF|CYBB|DAB2|DUSP1|EDN1|EGR1|EGR2|ENG|FOS|FOSB|GAB1|GATA6|GHR|GJA1|GNG11|GPER1|NR4A1|IL1B|IL6|JUND|LEPR|LMO2|MAOB|MMP19|PDK4|PHEX|PIK3R1|PLA2G1B|PPARG|PRKCE|PRKCQ|PTGER4|PTGFR|ROBO2|RXRG|CCL2|CXCL12|SLIT3|SSTR1|TCF21|TEK|TGFBR2|TGFBR3|SCGB1A1|ZFP36|BTG2|NR4A3|SOCS2|KAT2B|SOCS3|SLIT2|KL|ABCG1|RAMP2|SORBS1|KANK2|LATS2|PID…
GO:0048662	2.99921e-06	1	11	37	negative regulation of smooth muscle cell proliferation	BP	0.000174687	1264|2852|4881|4883|4969|5468|5739|7128|9314|57447|65009	CNN1|GPER1|NPR1|NPR3|OGN|PPARG|PTGIR|TNFAIP3|KLF4|NDRG2|NDRG4
GO:0090066	3.09064e-06	0.999999	51	451	regulation of anatomical structure size	BP	0.000179338	153|154|185|186|246|358|477|554|627|659|857|1073|1440|1636|1808|1906|1910|2697|2702|2852|3043|3055|3071|3084|3575|4881|5023|5028|5581|5592|6369|6387|6532|6711|7111|8862|9037|9353|9535|9732|23645|25802|51393|56920|57580|85358|89780|91663|93663|120892|130271	ADRB1|ADRB2|AGTR1|AGTR2|ALOX15|AQP1|ATP1A2|AVPR2|BDNF|BMPR2|CAV1|CFL2|CSF3|ACE|DPYSL2|EDN1|EDNRB|GJA1|GJA5|GPER1|HBB|HCK|NCKAP1L|NRG1|IL7R|NPR1|P2RX1|P2RY1|PRKCE|PRKG1|CCL24|CXCL12|SLC6A4|SPTBN1|TMOD1|APLN|SEMA5A|SLIT2|GMFG|DOCK4|PPP1R15A|LMOD1|TRPV2|SEMA3G|PREX1|SHANK3|WNT3A|MYADM|ARHGAP18|LRRK2|PLEKHH2
GO:0050766	3.14018e-06	1	12	45	positive regulation of phagocytosis	BP	0.000181533	948|2207|2621|2624|3071|3553|5468|5806|6347|6441|6556|146722	CD36|FCER1G|GAS6|GATA2|NCKAP1L|IL1B|PPARG|PTX3|CCL2|SFTPD|SLC11A1|CD300LF
GO:0045807	3.26427e-06	0.999999	20	112	positive regulation of endocytosis	BP	0.000188005	284|408|948|1601|2207|2621|2624|2719|3071|3553|5468|5806|6347|6401|6441|6556|6622|89780|146722|255738	ANGPT1|ARRB1|CD36|DAB2|FCER1G|GAS6|GATA2|GPC3|NCKAP1L|IL1B|PPARG|PTX3|CCL2|SELE|SFTPD|SLC11A1|SNCA|WNT3A|CD300LF|PCSK9
GO:0006869	3.48133e-06	0.999999	39	318	lipid transport	BP	0.000199764	21|32|185|186|341|366|857|948|1636|1906|3553|3949|4481|5243|5319|5320|5322|5468|5950|6578|8322|9429|9619|10351|23460|50487|55911|56729|80832|80833|81575|84879|114880|123264|255189|255738|338328|388121|653509	ABCA3|ACACB|AGTR1|AGTR2|APOC1|AQP9|CAV1|CD36|ACE|EDN1|IL1B|LDLR|MSR1|ABCB1|PLA2G1B|PLA2G2A|PLA2G5|PPARG|RBP4|SLCO2A1|FZD4|ABCG2|ABCG1|ABCA8|ABCA6|PLA2G3|APOBR|RETN|APOL4|APOL3|APOLD1|MFSD2A|OSBPL6|SLC51B|PLA2G4F|PCSK9|GPIHBP1|TNFAIP8L3|SFTPA1
GO:0060191	3.842e-06	0.999999	16	79	regulation of lipase activity	BP	0.000219646	185|341|728|2247|2263|3491|5319|5322|5581|6401|6622|8698|10316|115727|338328|653145	AGTR1|APOC1|C5AR1|FGF2|FGFR2|CYR61|PLA2G1B|PLA2G5|PRKCE|SELE|SNCA|S1PR4|NMUR1|RASGRP4|GPIHBP1|ANXA8
GO:0085029	3.87753e-06	1	10	29	extracellular matrix assembly	BP	0.000220862	2621|2824|3036|4239|4629|7148|10266|10516|28984|90102	GAS6|GPM6B|HAS1|MFAP4|MYH11|TNXB|RAMP2|FBLN5|RGCC|PHLDB2
GO:0031623	3.93139e-06	0.999999	17	83	receptor internalization	BP	0.00022311	284|408|857|948|2207|2890|3577|3579|6401|6456|6622|10203|10266|10268|89780|255738|284654	ANGPT1|ARRB1|CAV1|CD36|FCER1G|GRIA1|CXCR1|CXCR2|SELE|SH3GL2|SNCA|CALCRL|RAMP2|RAMP3|WNT3A|PCSK9|RSPO1
GO:1901343	3.96741e-06	0.999999	17	83	negative regulation of vasculature development	BP	0.000224332	1285|1634|2828|3202|4223|4881|5155|5196|6347|7010|7075|9314|23493|28984|79812|90627|641700	COL4A3|DCN|GPR4|HOXA5|MEOX2|NPR1|PDGFB|PF4|CCL2|TEK|TIE1|KLF4|HEY2|RGCC|MMRN2|STARD13|ECSCR
GO:0046620	4.03115e-06	0.999999	17	82	regulation of organ growth	BP	0.000226384	32|1906|2247|2263|2627|2697|3142|5950|6532|6909|6910|7048|7049|9254|23493|26524|80014	ACACB|EDN1|FGF2|FGFR2|GATA6|GJA1|HLX|RBP4|SLC6A4|TBX2|TBX5|TGFBR2|TGFBR3|CACNA2D2|HEY2|LATS2|WWC2
GO:0003073	4.03291e-06	0.999999	17	85	regulation of systemic arterial blood pressure	BP	0.000226384	153|154|185|186|554|659|1359|1511|1636|1906|2013|2621|2697|2702|4311|5155|5800	ADRB1|ADRB2|AGTR1|AGTR2|AVPR2|BMPR2|CPA3|CTSG|ACE|EDN1|EMP2|GAS6|GJA1|GJA5|MME|PDGFB|PTPRO
GO:0030193	4.09672e-06	0.999999	17	84	regulation of blood coagulation	BP	0.000228311	710|857|947|948|1361|1906|2160|2207|5155|5588|5592|5627|6403|7056|7099|84959|286133	SERPING1|CAV1|CD34|CD36|CPB2|EDN1|F11|FCER1G|PDGFB|PRKCQ|PRKG1|PROS1|SELP|THBD|TLR4|UBASH3B|SCARA5
GO:1900046	4.09672e-06	0.999999	17	84	regulation of hemostasis	BP	0.000228311	710|857|947|948|1361|1906|2160|2207|5155|5588|5592|5627|6403|7056|7099|84959|286133	SERPING1|CAV1|CD34|CD36|CPB2|EDN1|F11|FCER1G|PDGFB|PRKCQ|PRKG1|PROS1|SELP|THBD|TLR4|UBASH3B|SCARA5
GO:0010517	4.15015e-06	0.999999	14	60	regulation of phospholipase activity	BP	0.00023046	185|728|2247|2263|3491|5319|5322|5581|6401|6622|8698|10316|115727|653145	AGTR1|C5AR1|FGF2|FGFR2|CYR61|PLA2G1B|PLA2G5|PRKCE|SELE|SNCA|S1PR4|NMUR1|RASGRP4|ANXA8
GO:0055024	4.31879e-06	0.999999	15	66	regulation of cardiac muscle tissue development	BP	0.000238968	650|1906|2247|2263|2627|2697|3084|5950|6909|6910|7048|7049|23493|57158|89780	BMP2|EDN1|FGF2|FGFR2|GATA6|GJA1|NRG1|RBP4|TBX2|TBX5|TGFBR2|TGFBR3|HEY2|JPH2|WNT3A
GO:0002683	4.39398e-06	0.999998	43	382	negative regulation of immune system process	BP	0.000242263	2|246|284|695|710|714|1268|2207|2294|2615|2624|2852|3133|3142|3202|3575|4211|4332|5196|5295|5468|5734|6347|6387|6441|6693|7099|7128|7356|7538|7704|7940|8654|9173|9353|11025|11326|51208|51621|84959|90865|130733|146722	A2M|ALOX15|ANGPT1|BTK|SERPING1|C1QC|CNR1|FCER1G|FOXF1|LRRC32|GATA2|GPER1|HLA-E|HLX|HOXA5|IL7R|MEIS1|MNDA|PF4|PIK3R1|PPARG|PTGER4|CCL2|CXCL12|SFTPD|SPN|TLR4|TNFAIP3|SCGB1A1|ZFP36|ZBTB16|LST1|PDE5A|IL1RL1|SLIT2|LILRB3|VSIG4|CLDN18|KLF13|UBASH3B|IL33|TMEM178A|CD300LF
GO:0050880	4.55315e-06	0.999999	22	133	regulation of blood vessel size	BP	0.000250149	153|154|185|186|477|554|659|857|1636|1906|1910|2697|2702|2852|3043|4881|5023|5028|5592|6532|8862|9732	ADRB1|ADRB2|AGTR1|AGTR2|ATP1A2|AVPR2|BMPR2|CAV1|ACE|EDN1|EDNRB|GJA1|GJA5|GPER1|HBB|NPR1|P2RX1|P2RY1|PRKG1|SLC6A4|APLN|DOCK4
GO:0031401	4.58476e-06	0.999998	99	1141	positive regulation of protein modification process	BP	0.000250449	94|154|177|186|246|284|408|554|650|659|728|857|858|894|948|1326|1440|1490|1601|1636|1839|1906|1910|2013|2022|2247|2263|2264|2357|2549|2621|2662|2690|2852|3071|3084|3491|3553|3569|4616|4915|4921|5028|5155|5168|5319|5320|5322|5414|5581|6283|6347|6358|6368|6369|6556|6622|6693|7010|7044|7048|7099|7466|8322|8613|8654|9021|9365|9770|9839|10174|10395|23328|23533|23645|28984|51196|54959|55600|65009|89780…	ACVRL1|ADRB2|AGER|AGTR2|ALOX15|ANGPT1|ARRB1|AVPR2|BMP2|BMPR2|C5AR1|CAV1|CAV2|CCND2|CD36|MAP3K8|CSF3|CTGF|DAB2|ACE|HBEGF|EDN1|EDNRB|EMP2|ENG|FGF2|FGFR2|FGFR4|FPR1|GAB1|GAS6|GDF10|GHR|GPER1|NCKAP1L|NRG1|CYR61|IL1B|IL6|GADD45B|NTRK2|DDR2|P2RY1|PDGFB|ENPP2|PLA2G1B|PLA2G2A|PLA2G5|SEPT4|PRKCE|S100A12|CCL2|CCL14|CCL23|CCL24|SLC11A1|SNCA|SPN|TEK|LEFTY2|TGFBR2|TLR4|WFS1|FZD4|PLPP3|PDE5A|SOCS3|KL|RASSF2|ZE…
GO:0030100	4.59094e-06	0.999998	29	206	regulation of endocytosis	BP	0.000250449	246|284|341|408|857|948|1012|1601|2207|2268|2621|2624|2719|3055|3071|3553|5468|5806|6347|6401|6441|6456|6556|6622|11037|89780|146722|255738|284654	ALOX15|ANGPT1|APOC1|ARRB1|CAV1|CD36|CDH13|DAB2|FCER1G|FGR|GAS6|GATA2|GPC3|HCK|NCKAP1L|IL1B|PPARG|PTX3|CCL2|SELE|SFTPD|SH3GL2|SLC11A1|SNCA|STON1|WNT3A|CD300LF|PCSK9|RSPO1
GO:0051145	4.64663e-06	0.999999	13	51	smooth muscle cell differentiation	BP	0.000252597	1910|2022|2263|2294|2627|2852|5155|6935|8516|10266|23493|79652|255743	EDNRB|ENG|FGFR2|FOXF1|GATA6|GPER1|PDGFB|ZEB1|ITGA8|RAMP2|HEY2|TMEM204|NPNT
GO:0003206	4.76715e-06	0.999999	21	119	cardiac chamber morphogenesis	BP	0.000258243	659|2022|2263|2294|2627|2702|3084|3491|4091|5950|6909|6910|6926|7010|7048|7049|7134|9510|23493|57493|140706	BMPR2|ENG|FGFR2|FOXF1|GATA6|GJA5|NRG1|CYR61|SMAD6|RBP4|TBX2|TBX5|TBX3|TEK|TGFBR2|TGFBR3|TNNC1|ADAMTS1|HEY2|HEG1|CCM2L
GO:0003014	5.10052e-06	0.999999	20	112	renal system process	BP	0.000275339	185|186|358|361|554|947|1906|1910|2013|2621|2697|2702|3043|4881|4883|5155|5800|6446|7466|196883	AGTR1|AGTR2|AQP1|AQP4|AVPR2|CD34|EDN1|EDNRB|EMP2|GAS6|GJA1|GJA5|HBB|NPR1|NPR3|PDGFB|PTPRO|SGK1|WFS1|ADCY4
GO:0035150	5.13165e-06	0.999999	22	134	regulation of tube size	BP	0.000276058	153|154|185|186|477|554|659|857|1636|1906|1910|2697|2702|2852|3043|4881|5023|5028|5592|6532|8862|9732	ADRB1|ADRB2|AGTR1|AGTR2|ATP1A2|AVPR2|BMPR2|CAV1|ACE|EDN1|EDNRB|GJA1|GJA5|GPER1|HBB|NPR1|P2RX1|P2RY1|PRKG1|SLC6A4|APLN|DOCK4
GO:0006898	5.47166e-06	0.999998	41	343	receptor-mediated endocytosis	BP	0.00029333	154|284|341|408|857|858|948|1601|2207|2890|3039|3040|3043|3577|3579|3949|3988|4360|4481|4973|5168|6401|6441|6456|6622|7048|8685|9332|10203|10216|10266|10268|51554|55911|56241|81035|89780|157869|255738|284654|286133	ADRB2|ANGPT1|APOC1|ARRB1|CAV1|CAV2|CD36|DAB2|FCER1G|GRIA1|HBA1|HBA2|HBB|CXCR1|CXCR2|LDLR|LIPA|MRC1|MSR1|OLR1|ENPP2|SELE|SFTPD|SH3GL2|SNCA|TGFBR2|MARCO|CD163|CALCRL|PRG4|RAMP2|RAMP3|ACKR4|APOBR|SUSD2|COLEC12|WNT3A|SBSPON|PCSK9|RSPO1|SCARA5
GO:0002521	5.55683e-06	0.999998	50	464	leukocyte differentiation	BP	0.000296869	177|660|695|714|1316|1440|1958|1960|2207|2353|2621|2624|2719|3071|3142|3569|3575|3953|4242|5153|5196|5295|5468|5734|6237|6688|6693|6886|6935|7048|7099|7305|7704|8809|9308|9398|9452|9770|11025|26253|51208|57580|57864|81501|84959|130733|133522|139818|146433|150372	AGER|BMX|BTK|C1QC|KLF6|CSF3|EGR1|EGR3|FCER1G|FOS|GAS6|GATA2|GPC3|NCKAP1L|HLX|IL6|IL7R|LEPR|MFNG|PDE1B|PF4|PIK3R1|PPARG|PTGER4|RRAS|SPI1|SPN|TAL1|ZEB1|TGFBR2|TLR4|TYROBP|ZBTB16|IL18R1|CD83|CD101|ITM2A|RASSF2|LILRB3|CLEC4E|CLDN18|PREX1|SLC46A2|DCSTAMP|UBASH3B|TMEM178A|PPARGC1B|DOCK11|IL34|NFAM1
GO:0050886	5.90877e-06	0.999999	16	79	endocrine process	BP	0.000314586	185|186|554|1359|1511|1636|1906|2702|3553|4311|6926|8322|8862|56729|80223|338442	AGTR1|AGTR2|AVPR2|CPA3|CTSG|ACE|EDN1|GJA5|IL1B|MME|TBX3|FZD4|APLN|RETN|RAB11FIP1|HCAR2
GO:0043534	5.99777e-06	0.999999	16	76	blood vessel endothelial cell migration	BP	0.000317967	94|186|284|1960|2013|2247|3164|4223|5155|9314|9353|28984|54345|79812|90627|154810	ACVRL1|AGTR2|ANGPT1|EGR3|EMP2|FGF2|NR4A1|MEOX2|PDGFB|KLF4|SLIT2|RGCC|SOX18|MMRN2|STARD13|AMOTL1
GO:0030336	6.02481e-06	0.999998	30	214	negative regulation of cell migration	BP	0.000317967	94|104|186|1524|1602|1634|2022|2247|3036|3084|4223|5734|6237|6347|6387|6910|7075|8434|9314|9353|10395|28984|64411|65009|79812|80031|90102|90627|90865|286205	ACVRL1|ADARB1|AGTR2|CX3CR1|DACH1|DCN|ENG|FGF2|HAS1|NRG1|MEOX2|PTGER4|RRAS|CCL2|CXCL12|TBX5|TIE1|RECK|KLF4|SLIT2|DLC1|RGCC|ARAP3|NDRG4|MMRN2|SEMA6D|PHLDB2|STARD13|IL33|SCAI
GO:0010876	6.03383e-06	0.999997	41	351	lipid localization	BP	0.000317967	21|32|185|186|341|366|857|948|1636|1906|3553|3569|3949|4023|4481|5243|5319|5320|5322|5468|5950|6578|8322|9429|9619|10351|23460|50487|55911|56729|80832|80833|81575|84879|114880|123264|255189|255738|338328|388121|653509	ABCA3|ACACB|AGTR1|AGTR2|APOC1|AQP9|CAV1|CD36|ACE|EDN1|IL1B|IL6|LDLR|LPL|MSR1|ABCB1|PLA2G1B|PLA2G2A|PLA2G5|PPARG|RBP4|SLCO2A1|FZD4|ABCG2|ABCG1|ABCA8|ABCA6|PLA2G3|APOBR|RETN|APOL4|APOL3|APOLD1|MFSD2A|OSBPL6|SLC51B|PLA2G4F|PCSK9|GPIHBP1|TNFAIP8L3|SFTPA1
GO:0031347	6.27375e-06	0.999997	65	678	regulation of defense response	BP	0.000329489	2|177|185|683|695|710|728|729|730|732|857|948|1268|1524|1910|2167|2207|2219|2268|2294|2697|2852|3055|3133|3384|3553|3569|3949|4023|5138|5199|5320|5468|5581|5627|5734|5740|6283|6369|6401|6441|6693|7010|7099|7128|7356|8685|9021|9173|9314|10203|23705|25939|26253|51311|58189|58484|81035|90527|90865|146722|255877|338557|653509|729238	A2M|AGER|AGTR1|BST1|BTK|SERPING1|C5AR1|C6|C7|C8B|CAV1|CD36|CNR1|CX3CR1|EDNRB|FABP4|FCER1G|FCN1|FGR|FOXF1|GJA1|GPER1|HCK|HLA-E|ICAM2|IL1B|IL6|LDLR|LPL|PDE2A|CFP|PLA2G2A|PPARG|PRKCE|PROS1|PTGER4|PTGIS|S100A12|CCL24|SELE|SFTPD|SPN|TEK|TLR4|TNFAIP3|SCGB1A1|MARCO|SOCS3|IL1RL1|KLF4|CALCRL|CADM1|SAMHD1|CLEC4E|TLR8|WFDC1|NLRC4|COLEC12|DUOXA1|IL33|CD300LF|BCL6B|FFAR4|SFTPA1|SFTPA2
GO:0035296	6.44328e-06	0.999998	21	125	regulation of tube diameter	BP	0.000335105	153|154|185|186|477|554|659|857|1636|1906|1910|2697|2702|2852|4881|5023|5028|5592|6532|8862|9732	ADRB1|ADRB2|AGTR1|AGTR2|ATP1A2|AVPR2|BMPR2|CAV1|ACE|EDN1|EDNRB|GJA1|GJA5|GPER1|NPR1|P2RX1|P2RY1|PRKG1|SLC6A4|APLN|DOCK4
GO:0097746	6.44328e-06	0.999998	21	125	regulation of blood vessel diameter	BP	0.000335105	153|154|185|186|477|554|659|857|1636|1906|1910|2697|2702|2852|4881|5023|5028|5592|6532|8862|9732	ADRB1|ADRB2|AGTR1|AGTR2|ATP1A2|AVPR2|BMPR2|CAV1|ACE|EDN1|EDNRB|GJA1|GJA5|GPER1|NPR1|P2RX1|P2RY1|PRKG1|SLC6A4|APLN|DOCK4
GO:0010243	6.44558e-06	0.999997	76	807	response to organonitrogen compound	BP	0.000335105	181|185|186|358|366|477|554|590|728|845|847|857|858|1036|1268|1490|1536|1843|1906|1958|1959|2353|2354|2549|2690|2697|2791|2819|2852|3164|3553|3569|3727|4327|4915|5023|5138|5153|5166|5251|5295|5319|5322|5468|5581|5588|6347|6387|6532|6622|6935|7010|7056|7128|7832|8013|8835|8850|9021|9314|9353|9365|10365|10580|27244|28999|53905|55022|56729|64397|120892|133522|196883|245972|255738|338328	AGRP|AGTR1|AGTR2|AQP1|AQP9|ATP1A2|AVPR2|BCHE|C5AR1|CASQ2|CAT|CAV1|CAV2|CDO1|CNR1|CTGF|CYBB|DUSP1|EDN1|EGR1|EGR2|FOS|FOSB|GAB1|GHR|GJA1|GNG11|GPD1|GPER1|NR4A1|IL1B|IL6|JUND|MMP19|NTRK2|P2RX1|PDE2A|PDE1B|PDK4|PHEX|PIK3R1|PLA2G1B|PLA2G5|PPARG|PRKCE|PRKCQ|CCL2|CXCL12|SLC6A4|SNCA|ZEB1|TEK|THBD|TNFAIP3|BTG2|NR4A3|SOCS2|KAT2B|SOCS3|KLF4|SLIT2|KL|KLF2|SORBS1|SESN1|KLF15|DUOX1|PID1|RETN|ZNF106|LRRK2|PPARG…
GO:0044093	6.49768e-06	0.999996	151	1890	positive regulation of molecular function	BP	0.000336684	2|153|154|177|185|186|216|241|284|306|341|395|408|482|554|627|650|695|728|847|857|858|894|1285|1326|1440|1490|1636|1839|1901|1906|2013|2192|2247|2263|2264|2268|2357|2549|2621|2674|2690|2852|3071|3084|3316|3491|3553|3563|3568|3569|4242|4616|4883|4921|5023|5155|5243|5319|5322|5334|5468|5581|5588|5739|5923|6283|6347|6358|6368|6369|6401|6446|6556|6622|6711|7010|7048|7099|7466|8322|8613|8654|8698|8787…	A2M|ADRB1|ADRB2|AGER|AGTR1|AGTR2|ALDH1A1|ALOX5AP|ANGPT1|ANXA3|APOC1|ARHGAP6|ARRB1|ATP1B2|AVPR2|BDNF|BMP2|BTK|C5AR1|CAT|CAV1|CAV2|CCND2|COL4A3|MAP3K8|CSF3|CTGF|ACE|HBEGF|S1PR1|EDN1|EMP2|FBLN1|FGF2|FGFR2|FGFR4|FGR|FPR1|GAB1|GAS6|GFRA1|GHR|GPER1|NCKAP1L|NRG1|HSPB2|CYR61|IL1B|IL3RA|IL5RA|IL6|MFNG|GADD45B|NPR3|DDR2|P2RX1|PDGFB|ABCB1|PLA2G1B|PLA2G5|PLCL1|PPARG|PRKCE|PRKCQ|PTGIR|RASGRF1|S100A12|CCL2|CCL…
GO:0032270	6.95801e-06	0.999996	118	1433	positive regulation of cellular protein metabolic process	BP	0.00035837	94|154|177|185|186|246|284|408|554|650|659|728|729|857|858|894|948|1285|1326|1440|1490|1601|1636|1839|1906|1910|2013|2022|2192|2247|2263|2264|2357|2549|2621|2662|2690|2852|3071|3084|3491|3553|3569|4616|4915|4921|5023|5028|5155|5168|5319|5320|5322|5414|5468|5581|6283|6347|6358|6368|6369|6556|6622|6693|7010|7044|7048|7099|7123|7128|7466|8322|8613|8654|9021|9314|9365|9647|9770|9839|10174|10395|23328…	ACVRL1|ADRB2|AGER|AGTR1|AGTR2|ALOX15|ANGPT1|ARRB1|AVPR2|BMP2|BMPR2|C5AR1|C6|CAV1|CAV2|CCND2|CD36|COL4A3|MAP3K8|CSF3|CTGF|DAB2|ACE|HBEGF|EDN1|EDNRB|EMP2|ENG|FBLN1|FGF2|FGFR2|FGFR4|FPR1|GAB1|GAS6|GDF10|GHR|GPER1|NCKAP1L|NRG1|CYR61|IL1B|IL6|GADD45B|NTRK2|DDR2|P2RX1|P2RY1|PDGFB|ENPP2|PLA2G1B|PLA2G2A|PLA2G5|SEPT4|PPARG|PRKCE|S100A12|CCL2|CCL14|CCL23|CCL24|SLC11A1|SNCA|SPN|TEK|LEFTY2|TGFBR2|TLR4|CLEC3B…
GO:0014065	6.96246e-06	0.999998	25	163	phosphatidylinositol 3-kinase signaling	BP	0.00035837	284|847|1440|1634|1839|1906|2247|2263|2264|2268|2549|2852|3084|4915|5155|5295|6403|7010|8395|9314|9365|23533|80243|152831|653361	ANGPT1|CAT|CSF3|DCN|HBEGF|EDN1|FGF2|FGFR2|FGFR4|FGR|GAB1|GPER1|NRG1|NTRK2|PDGFB|PIK3R1|SELP|TEK|PIP5K1B|KLF4|KL|PIK3R5|PREX2|KLB|NCF1
GO:1903706	6.99429e-06	0.999997	38	324	regulation of hemopoiesis	BP	0.000358816	177|695|714|1440|1636|1960|2353|2621|2624|3071|3142|3202|3569|3575|4211|5196|5295|6688|6886|6935|7048|7099|7305|7538|7704|9308|9398|9770|11025|51208|51621|57864|81501|84959|130733|133522|146433|150372	AGER|BTK|C1QC|CSF3|ACE|EGR3|FOS|GAS6|GATA2|NCKAP1L|HLX|HOXA5|IL6|IL7R|MEIS1|PF4|PIK3R1|SPI1|TAL1|ZEB1|TGFBR2|TLR4|TYROBP|ZFP36|ZBTB16|CD83|CD101|RASSF2|LILRB3|CLDN18|KLF13|SLC46A2|DCSTAMP|UBASH3B|TMEM178A|PPARGC1B|IL34|NFAM1
GO:0010810	7.03038e-06	0.999998	27	179	regulation of cell-substrate adhesion	BP	0.000359477	94|246|395|683|948|1012|1842|2013|2192|2294|2824|3491|5295|5581|5800|7010|7402|8322|9647|9806|10395|25890|57580|79625|90102|91663|255743	ACVRL1|ALOX15|ARHGAP6|BST1|CD36|CDH13|ECM2|EMP2|FBLN1|FOXF1|GPM6B|CYR61|PIK3R1|PRKCE|PTPRO|TEK|UTRN|FZD4|PPM1F|SPOCK2|DLC1|ABI3BP|PREX1|NDNF|PHLDB2|MYADM|NPNT
GO:0090287	7.09931e-06	0.999997	32	236	regulation of cellular response to growth factor stimulus	BP	0.000361808	94|186|659|857|858|1030|1601|1634|2022|2247|2263|2627|2719|3491|3553|4091|6935|7048|7049|8322|8425|8516|9353|23090|25928|64399|79652|79812|83891|91851|168667|255743	ACVRL1|AGTR2|BMPR2|CAV1|CAV2|CDKN2B|DAB2|DCN|ENG|FGF2|FGFR2|GATA6|GPC3|CYR61|IL1B|SMAD6|ZEB1|TGFBR2|TGFBR3|FZD4|LTBP4|ITGA8|SLIT2|ZNF423|SOSTDC1|HHIP|TMEM204|MMRN2|SNX25|CHRDL1|BMPER|NPNT
GO:0031325	7.24788e-06	0.999995	214	2896	positive regulation of cellular metabolic process	BP	0.000368168	32|94|153|154|177|185|186|246|284|306|322|341|408|467|554|650|659|728|729|745|857|858|894|948|1012|1030|1285|1316|1326|1440|1490|1536|1601|1634|1636|1839|1901|1906|1910|1958|1959|2013|2022|2034|2078|2115|2192|2247|2263|2264|2268|2294|2313|2353|2354|2357|2549|2621|2624|2627|2662|2690|2819|2852|2977|3043|3071|3084|3164|3202|3400|3491|3553|3569|3727|3949|4005|4091|4093|4129|4211|4222|4223|4616|4784|…	ACACB|ACVRL1|ADRB1|ADRB2|AGER|AGTR1|AGTR2|ALOX15|ANGPT1|ANXA3|APBB1|APOC1|ARRB1|ATF3|AVPR2|BMP2|BMPR2|C5AR1|C6|MYRF|CAV1|CAV2|CCND2|CD36|CDH13|CDKN2B|COL4A3|KLF6|MAP3K8|CSF3|CTGF|CYBB|DAB2|DCN|ACE|HBEGF|S1PR1|EDN1|EDNRB|EGR1|EGR2|EMP2|ENG|EPAS1|ERG|ETV1|FBLN1|FGF2|FGFR2|FGFR4|FGR|FOXF1|FLI1|FOS|FOSB|FPR1|GAB1|GAS6|GATA2|GATA6|GDF10|GHR|GPD1|GPER1|GUCY1A2|HBB|NCKAP1L|NRG1|NR4A1|HOXA5|ID4|CYR61|IL1…
GO:0048771	7.27822e-06	0.999998	23	144	tissue remodeling	BP	0.000368502	94|154|177|186|659|857|1636|1901|2034|2078|2702|3569|3953|3988|5166|5745|7128|9770|51208|53832|81501|84959|133522	ACVRL1|ADRB2|AGER|AGTR2|BMPR2|CAV1|ACE|S1PR1|EPAS1|ERG|GJA5|IL6|LEPR|LIPA|PDK4|PTH1R|TNFAIP3|RASSF2|CLDN18|IL20RA|DCSTAMP|UBASH3B|PPARGC1B
GO:0032844	7.32657e-06	0.999997	49	449	regulation of homeostatic process	BP	0.000368792	185|186|408|477|554|845|857|948|1268|1634|1901|1906|1910|2207|2247|2264|2273|2624|2702|2852|3071|3202|3553|3569|3949|3953|4881|5166|5319|5581|5588|6622|6688|6886|7128|7538|8013|8862|9002|51092|51208|51621|53832|57158|81501|84959|120892|133522|338442	AGTR1|AGTR2|ARRB1|ATP1A2|AVPR2|CASQ2|CAV1|CD36|CNR1|DCN|S1PR1|EDN1|EDNRB|FCER1G|FGF2|FGFR4|FHL1|GATA2|GJA5|GPER1|NCKAP1L|HOXA5|IL1B|IL6|LDLR|LEPR|NPR1|PDK4|PLA2G1B|PRKCE|PRKCQ|SNCA|SPI1|TAL1|TNFAIP3|ZFP36|NR4A3|APLN|F2RL3|SIDT2|CLDN18|KLF13|IL20RA|JPH2|DCSTAMP|UBASH3B|LRRK2|PPARGC1B|HCAR2
GO:2000146	7.37256e-06	0.999997	31	228	negative regulation of cell motility	BP	0.000368792	94|104|186|1524|1602|1634|2022|2192|2247|3036|3084|4223|5734|6237|6347|6387|6910|7075|8434|9314|9353|10395|28984|64411|65009|79812|80031|90102|90627|90865|286205	ACVRL1|ADARB1|AGTR2|CX3CR1|DACH1|DCN|ENG|FBLN1|FGF2|HAS1|NRG1|MEOX2|PTGER4|RRAS|CCL2|CXCL12|TBX5|TIE1|RECK|KLF4|SLIT2|DLC1|RGCC|ARAP3|NDRG4|MMRN2|SEMA6D|PHLDB2|STARD13|IL33|SCAI
GO:0007610	7.37523e-06	0.999997	58	565	behavior	BP	0.000368792	104|181|186|477|590|894|1268|1271|1524|1602|1959|2115|2353|2697|2890|3084|3569|3953|4045|4211|4900|4915|5028|5153|5581|5730|5923|6323|6387|6414|6446|6532|6622|6886|7111|7122|7466|7832|7881|8013|8322|8516|8528|8862|11346|23237|27253|27306|51301|53358|55084|56729|65009|80243|85358|120892|163175|257194	ADARB1|AGRP|AGTR2|ATP1A2|BCHE|CCND2|CNR1|CNTFR|CX3CR1|DACH1|EGR2|ETV1|FOS|GJA1|GRIA1|NRG1|IL6|LEPR|LSAMP|MEIS1|NRGN|NTRK2|P2RY1|PDE1B|PRKCE|PTGDS|RASGRF1|SCN1A|CXCL12|SELENOP|SGK1|SLC6A4|SNCA|TAL1|TMOD1|CLDN5|WFS1|BTG2|KCNAB1|NR4A3|FZD4|ITGA8|DDO|APLN|SYNPO|ARC|PCDH17|HPGDS|GCNT4|SHC3|SOBP|RETN|NDRG4|PREX2|SHANK3|LRRK2|LGI4|NEGR1
GO:0016337	7.37918e-06	0.999996	60	590	single organismal cell-cell adhesion	BP	0.000368792	177|246|857|947|1003|1178|1305|1326|1960|2294|2615|2621|3043|3071|3133|3142|3384|3491|3553|3569|3575|5295|5588|5592|6347|6387|6401|6403|6404|6441|6614|6693|6935|7048|7356|7704|8013|8516|8613|8654|9308|9314|10398|10630|11326|22918|28984|51744|55679|57864|58494|83700|84959|89780|90952|91663|140706|255743|257194|342035	AGER|ALOX15|CAV1|CD34|CDH5|CLC|COL13A1|MAP3K8|EGR3|FOXF1|LRRC32|GAS6|HBB|NCKAP1L|HLA-E|HLX|ICAM2|CYR61|IL1B|IL6|IL7R|PIK3R1|PRKCQ|PRKG1|CCL2|CXCL12|SELE|SELP|SELPLG|SFTPD|SIGLEC1|SPN|ZEB1|TGFBR2|SCGB1A1|ZBTB16|NR4A3|ITGA8|PLPP3|PDE5A|CD83|KLF4|MYL9|PDPN|VSIG4|CD93|RGCC|CD244|LIMS2|SLC46A2|JAM2|JAM3|UBASH3B|WNT3A|ESAM|MYADM|CCM2L|NPNT|NEGR1|GLDN
GO:0050818	7.75844e-06	0.999998	17	88	regulation of coagulation	BP	0.0003865	710|857|947|948|1361|1906|2160|2207|5155|5588|5592|5627|6403|7056|7099|84959|286133	SERPING1|CAV1|CD34|CD36|CPB2|EDN1|F11|FCER1G|PDGFB|PRKCQ|PRKG1|PROS1|SELP|THBD|TLR4|UBASH3B|SCARA5
GO:1902105	8.62789e-06	0.999997	31	239	regulation of leukocyte differentiation	BP	0.000428435	177|695|714|1960|2353|2621|2624|3071|3142|3569|3575|5196|5295|6886|6935|7048|7099|7305|7704|9308|9398|9770|11025|51208|57864|81501|84959|130733|133522|146433|150372	AGER|BTK|C1QC|EGR3|FOS|GAS6|GATA2|NCKAP1L|HLX|IL6|IL7R|PF4|PIK3R1|TAL1|ZEB1|TGFBR2|TLR4|TYROBP|ZBTB16|CD83|CD101|RASSF2|LILRB3|CLDN18|SLC46A2|DCSTAMP|UBASH3B|TMEM178A|PPARGC1B|IL34|NFAM1
GO:0043086	8.92102e-06	0.999995	75	839	negative regulation of catalytic activity	BP	0.000441576	2|32|104|306|341|358|408|710|857|1030|1268|1285|1473|1634|1843|1850|1910|2167|2621|2719|3071|3553|3569|3730|3953|4616|4883|5468|5627|5806|6590|6622|7078|7128|7356|7538|8434|8639|8835|8850|9021|9314|9353|9467|9535|9647|9749|9806|10129|10763|11142|23645|23767|26524|27074|27151|51232|55924|57580|57718|58189|58484|64101|80243|80760|84959|94030|94274|114769|120892|128488|221476|221692|389119|653145	A2M|ACACB|ADARB1|ANXA3|APOC1|AQP1|ARRB1|SERPING1|CAV1|CDKN2B|CNR1|COL4A3|CST5|DCN|DUSP1|DUSP8|EDNRB|FABP4|GAS6|GPC3|NCKAP1L|IL1B|IL6|ANOS1|LEPR|GADD45B|NPR3|PPARG|PROS1|PTX3|SLPI|SNCA|TIMP3|TNFAIP3|SCGB1A1|ZFP36|RECK|AOC3|SOCS2|KAT2B|SOCS3|KLF4|SLIT2|SH3BP5|GMFG|PPM1F|PHACTR2|SPOCK2|FRY|NES|PKIG|PPP1R15A|FLRT3|LATS2|LAMP3|CPAMD8|CRIM1|FAM212B|PREX1|PPP4R4|WFDC1|NLRC4|LRRC4|PREX2|ITIH5|UBASH3B|LRR…
GO:0072577	8.99079e-06	0.999999	12	47	endothelial cell apoptotic process	BP	0.000443612	284|659|1285|2621|2852|7010|7128|9037|10266|28984|79625|641700	ANGPT1|BMPR2|COL4A3|GAS6|GPER1|TEK|TNFAIP3|SEMA5A|RAMP2|RGCC|NDNF|ECSCR
GO:0042326	9.45515e-06	0.999996	48	432	negative regulation of phosphorylation	BP	0.000465043	104|284|408|467|857|1030|1634|1843|1850|2022|2167|2192|2203|2852|3553|3569|4091|4616|6622|7078|7099|7128|8613|8835|8850|9021|9314|9353|9467|9535|9647|9770|11142|23645|23767|26524|55022|55924|57447|57580|64101|80243|83891|84959|91663|94030|120892|389119	ADARB1|ANGPT1|ARRB1|ATF3|CAV1|CDKN2B|DCN|DUSP1|DUSP8|ENG|FABP4|FBLN1|FBP1|GPER1|IL1B|IL6|SMAD6|GADD45B|SNCA|TIMP3|TLR4|TNFAIP3|PLPP3|SOCS2|KAT2B|SOCS3|KLF4|SLIT2|SH3BP5|GMFG|PPM1F|RASSF2|PKIG|PPP1R15A|FLRT3|LATS2|PID1|FAM212B|NDRG2|PREX1|LRRC4|PREX2|SNX25|UBASH3B|MYADM|LRRC4B|LRRK2|FAM212A
GO:0043549	1.049e-05	0.999994	75	795	regulation of kinase activity	BP	0.000514307	104|154|177|284|408|650|728|857|894|1030|1326|1634|1636|1843|1850|1906|2013|2167|2247|2268|2357|2549|2621|2690|3071|3084|3491|3553|3569|4616|4921|5155|5295|5319|6283|6556|6622|7010|7048|7099|7128|8322|8654|8835|8850|9021|9079|9314|9467|9535|9647|9770|9839|11142|23328|23533|23767|26524|28984|29950|51196|55924|57580|64101|80243|84959|89780|94030|114898|120892|196883|285016|388121|389119|653361	ADARB1|ADRB2|AGER|ANGPT1|ARRB1|BMP2|C5AR1|CAV1|CCND2|CDKN2B|MAP3K8|DCN|ACE|DUSP1|DUSP8|EDN1|EMP2|FABP4|FGF2|FGR|FPR1|GAB1|GAS6|GHR|NCKAP1L|NRG1|CYR61|IL1B|IL6|GADD45B|DDR2|PDGFB|PIK3R1|PLA2G1B|S100A12|SLC11A1|SNCA|TEK|TGFBR2|TLR4|TNFAIP3|FZD4|PDE5A|SOCS2|KAT2B|SOCS3|LDB2|KLF4|SH3BP5|GMFG|PPM1F|RASSF2|ZEB2|PKIG|SASH1|PIK3R5|FLRT3|LATS2|RGCC|SERTAD1|PLCE1|FAM212B|PREX1|LRRC4|PREX2|UBASH3B|WNT3A|LRR…
GO:0007399	1.0536e-05	0.999993	175	2197	nervous system development	BP	0.000514937	104|177|186|306|322|358|554|590|597|627|650|659|728|745|1268|1271|1524|1808|1827|1901|1910|1959|1960|2009|2022|2115|2247|2263|2277|2353|2549|2621|2624|2674|2697|2823|2824|2852|3084|3142|3340|3400|3569|3730|3777|4045|4093|4129|4211|4628|4900|4915|4919|4969|4974|5010|5028|5098|5295|5376|5414|5468|5588|5592|5789|5800|5923|6092|6347|6383|6387|6414|6446|6456|6532|6586|6622|6711|6751|6867|6886|6925|692…	ADARB1|AGER|AGTR2|ANXA3|APBB1|AQP1|AVPR2|BCHE|BCL2A1|BDNF|BMP2|BMPR2|C5AR1|MYRF|CNR1|CNTFR|CX3CR1|DPYSL2|RCAN1|S1PR1|EDNRB|EGR2|EGR3|EML1|ENG|ETV1|FGF2|FGFR2|VEGFD|FOS|GAB1|GAS6|GATA2|GFRA1|GJA1|GPM6A|GPM6B|GPER1|NRG1|HLX|NDST1|ID4|IL6|ANOS1|KCNK3|LSAMP|SMAD9|MAOB|MEIS1|MYH10|NRGN|NTRK2|ROR1|OGN|OMG|CLDN11|P2RY1|PCDHGC3|PIK3R1|PMP22|SEPT4|PPARG|PRKCQ|PRKG1|PTPRD|PTPRO|RASGRF1|ROBO2|CCL2|SDC2|CXCL…
GO:0030168	1.13101e-05	0.999996	24	159	platelet activation	BP	0.000551029	408|2157|2207|2621|3043|3569|5023|5028|5155|5196|5295|5581|5588|5592|6403|7056|7099|7450|9002|10398|10630|23533|84959|89780	ARRB1|F8|FCER1G|GAS6|HBB|IL6|P2RX1|P2RY1|PDGFB|PF4|PIK3R1|PRKCE|PRKCQ|PRKG1|SELP|THBD|TLR4|VWF|F2RL3|MYL9|PDPN|PIK3R5|UBASH3B|WNT3A
GO:1901652	1.13459e-05	0.999995	48	448	response to peptide	BP	0.000551039	181|185|186|554|847|857|858|1036|1490|1536|1906|1958|1959|2549|2690|2697|2791|2852|3164|3553|3569|3727|5166|5251|5295|5319|5468|5588|6347|6387|7010|7128|7832|8013|8835|8850|9021|9314|9365|10365|10580|28999|55022|56729|64397|196883|245972|255738	AGRP|AGTR1|AGTR2|AVPR2|CAT|CAV1|CAV2|CDO1|CTGF|CYBB|EDN1|EGR1|EGR2|GAB1|GHR|GJA1|GNG11|GPER1|NR4A1|IL1B|IL6|JUND|PDK4|PHEX|PIK3R1|PLA2G1B|PPARG|PRKCQ|CCL2|CXCL12|TEK|TNFAIP3|BTG2|NR4A3|SOCS2|KAT2B|SOCS3|KLF4|KL|KLF2|SORBS1|KLF15|PID1|RETN|ZNF106|ADCY4|ATP6V0D2|PCSK9
GO:0051049	1.20597e-05	0.999993	143	1796	regulation of transport	BP	0.000583876	154|185|186|246|284|322|341|358|408|477|482|554|845|857|947|948|1012|1268|1318|1361|1410|1440|1536|1601|1906|1910|2040|2207|2219|2268|2273|2294|2615|2621|2624|2697|2702|2719|2824|2852|3055|3071|3084|3133|3553|3569|3762|3772|4023|4129|4638|4881|5023|5028|5138|5155|5243|5295|5319|5348|5468|5581|5593|5734|5806|5923|5950|6323|6330|6332|6347|6387|6401|6425|6441|6446|6456|6532|6556|6622|6711|6769|7099|…	ADRB2|AGTR1|AGTR2|ALOX15|ANGPT1|APBB1|APOC1|AQP1|ARRB1|ATP1A2|ATP1B2|AVPR2|CASQ2|CAV1|CD34|CD36|CDH13|CNR1|SLC31A2|CPB2|CRYAB|CSF3|CYBB|DAB2|EDN1|EDNRB|STOM|FCER1G|FCN1|FGR|FHL1|FOXF1|LRRC32|GAS6|GATA2|GJA1|GJA5|GPC3|GPM6B|GPER1|HCK|NCKAP1L|NRG1|HLA-E|IL1B|IL6|KCNJ5|KCNJ15|LPL|MAOB|MYLK|NPR1|P2RX1|P2RY1|PDE2A|PDGFB|ABCB1|PIK3R1|PLA2G1B|FXYD1|PPARG|PRKCE|PRKG2|PTGER4|PTX3|RASGRF1|RBP4|SCN1A|SCN4B|…
GO:0002040	1.25866e-05	0.999997	15	69	sprouting angiogenesis	BP	0.00060749	94|284|1012|1960|2247|3164|4223|7010|9037|9314|9353|10266|79812|90627|168667	ACVRL1|ANGPT1|CDH13|EGR3|FGF2|NR4A1|MEOX2|TEK|SEMA5A|KLF4|SLIT2|RAMP2|MMRN2|STARD13|BMPER
GO:0055094	1.2732e-05	0.999999	8	22	response to lipoprotein particle	BP	0.000612598	948|1012|2207|3949|4023|5468|6347|9619	CD36|CDH13|FCER1G|LDLR|LPL|PPARG|CCL2|ABCG1
GO:0001816	1.30609e-05	0.999993	62	644	cytokine production	BP	0.000626481	177|186|284|408|554|695|728|947|948|1178|1536|1958|2167|2207|2219|2268|2532|2615|2621|2627|3071|3133|3553|3568|3569|3988|4023|5196|5295|5319|5588|5734|6283|6347|6441|6556|6693|6711|7099|7128|7356|7538|8013|8809|9173|9308|9314|10365|11326|23705|26253|28984|51311|51744|57447|57493|58484|89780|90865|140706|150372|338557	AGER|AGTR2|ANGPT1|ARRB1|AVPR2|BTK|C5AR1|CD34|CD36|CLC|CYBB|EGR1|FABP4|FCER1G|FCN1|FGR|ACKR1|LRRC32|GAS6|GATA6|NCKAP1L|HLA-E|IL1B|IL5RA|IL6|LIPA|LPL|PF4|PIK3R1|PLA2G1B|PRKCQ|PTGER4|S100A12|CCL2|SFTPD|SLC11A1|SPN|SPTBN1|TLR4|TNFAIP3|SCGB1A1|ZFP36|NR4A3|IL18R1|IL1RL1|CD83|KLF4|KLF2|VSIG4|CADM1|CLEC4E|RGCC|TLR8|CD244|NDRG2|HEG1|NLRC4|WNT3A|IL33|CCM2L|NFAM1|FFAR4
GO:0003015	1.33645e-05	0.999995	33	262	heart process	BP	0.000639065	153|186|477|482|845|857|1490|1636|1674|1839|1906|2034|2697|2702|3762|3777|4881|5348|6323|6330|6445|6505|6909|7134|7136|8654|8862|9254|10268|10659|23493|27129|53826	ADRB1|AGTR2|ATP1A2|ATP1B2|CASQ2|CAV1|CTGF|ACE|DES|HBEGF|EDN1|EPAS1|GJA1|GJA5|KCNJ5|KCNK3|NPR1|FXYD1|SCN1A|SCN4B|SGCG|SLC1A1|TBX2|TNNC1|TNNI2|PDE5A|APLN|CACNA2D2|RAMP3|CELF2|HEY2|HSPB7|FXYD6
GO:2000379	1.37618e-05	0.999997	16	85	positive regulation of reactive oxygen species metabolic process	BP	0.000656037	185|186|948|1906|3043|3553|3569|5155|5806|6622|7048|7099|9314|10365|55022|90527	AGTR1|AGTR2|CD36|EDN1|HBB|IL1B|IL6|PDGFB|PTX3|SNCA|TGFBR2|TLR4|KLF4|KLF2|PID1|DUOXA1
GO:0010518	1.456e-05	0.999998	12	50	positive regulation of phospholipase activity	BP	0.000691956	185|728|2247|2263|3491|5319|5322|5581|6401|8698|10316|115727	AGTR1|C5AR1|FGF2|FGFR2|CYR61|PLA2G1B|PLA2G5|PRKCE|SELE|S1PR4|NMUR1|RASGRP4
GO:0016525	1.5541e-05	0.999997	15	74	negative regulation of angiogenesis	BP	0.00073632	1285|1634|2828|3202|4223|4881|5196|6347|7010|7075|9314|28984|79812|90627|641700	COL4A3|DCN|GPR4|HOXA5|MEOX2|NPR1|PF4|CCL2|TEK|TIE1|KLF4|RGCC|MMRN2|STARD13|ECSCR
GO:0016049	1.56121e-05	0.999993	51	482	cell growth	BP	0.000737434	94|185|186|322|627|659|1410|1490|1808|1839|1906|2012|2203|2273|2697|3084|3373|3491|3569|3575|4881|5468|5588|6387|6446|6456|6586|7044|7048|7049|8425|8835|8839|9037|9353|9839|10516|11170|23767|26153|51196|51232|51393|56920|58189|64321|65009|79625|81501|89780|115727	ACVRL1|AGTR1|AGTR2|APBB1|BDNF|BMPR2|CRYAB|CTGF|DPYSL2|HBEGF|EDN1|EMP1|FBP1|FHL1|GJA1|NRG1|HYAL1|CYR61|IL6|IL7R|NPR1|PPARG|PRKCQ|CXCL12|SGK1|SH3GL2|SLIT3|LEFTY2|TGFBR2|TGFBR3|LTBP4|SOCS2|WISP2|SEMA5A|SLIT2|ZEB2|FBLN5|FAM107A|FLRT3|KIF26A|PLCE1|CRIM1|TRPV2|SEMA3G|WFDC1|SOX17|NDRG4|NDNF|DCSTAMP|WNT3A|RASGRP4
GO:0060043	1.5734e-05	0.999998	10	34	regulation of cardiac muscle cell proliferation	BP	0.000740931	2247|2263|2627|2697|5950|6909|6910|7048|7049|23493	FGF2|FGFR2|GATA6|GJA1|RBP4|TBX2|TBX5|TGFBR2|TGFBR3|HEY2
GO:1903035	1.58576e-05	0.999997	15	75	negative regulation of response to wounding	BP	0.00074449	177|710|947|1361|1906|2160|2247|2697|5155|5592|5627|7056|58189|84959|90102	AGER|SERPING1|CD34|CPB2|EDN1|F11|FGF2|GJA1|PDGFB|PRKG1|PROS1|THBD|WFDC1|UBASH3B|PHLDB2
GO:0061384	1.67891e-05	0.999998	10	34	heart trabecula morphogenesis	BP	0.000785843	1901|2022|3084|5950|7010|7049|9510|23493|57493|140706	S1PR1|ENG|NRG1|RBP4|TEK|TGFBR3|ADAMTS1|HEY2|HEG1|CCM2L
GO:0045859	1.71138e-05	0.999991	70	740	regulation of protein kinase activity	BP	0.000798627	104|154|177|284|408|650|728|857|894|1030|1326|1634|1636|1843|1850|1906|2013|2167|2247|2268|2357|2549|2621|2690|3071|3084|3491|3553|3569|4616|4921|5155|5319|6283|6556|6622|7048|7099|7128|8322|8654|8835|8850|9021|9467|9535|9647|9770|9839|11142|23328|23533|23767|26524|28984|29950|51196|55924|57580|64101|80243|84959|89780|94030|114898|120892|196883|285016|389119|653361	ADARB1|ADRB2|AGER|ANGPT1|ARRB1|BMP2|C5AR1|CAV1|CCND2|CDKN2B|MAP3K8|DCN|ACE|DUSP1|DUSP8|EDN1|EMP2|FABP4|FGF2|FGR|FPR1|GAB1|GAS6|GHR|NCKAP1L|NRG1|CYR61|IL1B|IL6|GADD45B|DDR2|PDGFB|PLA2G1B|S100A12|SLC11A1|SNCA|TGFBR2|TLR4|TNFAIP3|FZD4|PDE5A|SOCS2|KAT2B|SOCS3|SH3BP5|GMFG|PPM1F|RASSF2|ZEB2|PKIG|SASH1|PIK3R5|FLRT3|LATS2|RGCC|SERTAD1|PLCE1|FAM212B|PREX1|LRRC4|PREX2|UBASH3B|WNT3A|LRRC4B|C1QTNF2|LRRK2|ADC…
GO:1902903	1.7794e-05	0.999993	35	283	regulation of supramolecular fiber organization	BP	0.000827875	246|395|1073|1410|1440|1490|1901|1906|3055|3071|5295|5581|5734|6369|6387|6622|6711|7111|9037|9353|9535|9647|10174|10395|11346|22899|25802|28984|57580|85358|90102|91663|93663|130271|171024	ALOX15|ARHGAP6|CFL2|CRYAB|CSF3|CTGF|S1PR1|EDN1|HCK|NCKAP1L|PIK3R1|PRKCE|PTGER4|CCL24|CXCL12|SNCA|SPTBN1|TMOD1|SEMA5A|SLIT2|GMFG|PPM1F|SORBS3|DLC1|SYNPO|ARHGEF15|LMOD1|RGCC|PREX1|SHANK3|PHLDB2|MYADM|ARHGAP18|PLEKHH2|SYNPO2
GO:0050729	1.7936e-05	0.999996	17	100	positive regulation of inflammatory response	BP	0.000831982	185|695|1268|2167|2207|3553|3569|3949|4023|5138|5320|5734|6283|6369|7099|9173|90865	AGTR1|BTK|CNR1|FABP4|FCER1G|IL1B|IL6|LDLR|LPL|PDE2A|PLA2G2A|PTGER4|S100A12|CCL24|TLR4|IL1RL1|IL33
GO:1903409	1.94896e-05	0.999995	16	86	reactive oxygen species biosynthetic process	BP	0.000901351	186|857|947|1536|1906|3043|3553|3569|4129|5740|5806|6622|7099|9314|10365|53905	AGTR2|CAV1|CD34|CYBB|EDN1|HBB|IL1B|IL6|MAOB|PTGIS|PTX3|SNCA|TLR4|KLF4|KLF2|DUOX1
GO:0090023	2.01948e-05	0.999998	8	27	positive regulation of neutrophil chemotaxis	BP	0.000931186	728|1906|2920|2921|3071|5196|5473|23604	C5AR1|EDN1|CXCL2|CXCL3|NCKAP1L|PF4|PPBP|DAPK2
GO:0031960	2.02986e-05	0.999994	23	161	response to corticosteroid	BP	0.000933135	21|186|306|358|590|687|1036|1490|1536|1843|1906|2022|2353|2354|2852|3569|4129|6347|6586|7356|7538|9353|133522	ABCA3|AGTR2|ANXA3|AQP1|BCHE|KLF9|CDO1|CTGF|CYBB|DUSP1|EDN1|ENG|FOS|FOSB|GPER1|IL6|MAOB|CCL2|SLIT3|SCGB1A1|ZFP36|SLIT2|PPARGC1B
GO:0003093	2.03576e-05	0.999999	6	12	regulation of glomerular filtration	BP	0.000933135	2013|2621|2697|2702|5155|5800	EMP2|GAS6|GJA1|GJA5|PDGFB|PTPRO
GO:0051047	2.05715e-05	0.999991	40	362	positive regulation of secretion	BP	0.00094016	186|322|358|408|947|1361|1906|1910|2207|2219|2268|2624|2697|2852|3133|3553|3569|4023|4881|5028|5319|5581|5734|5950|6387|6532|6622|6711|8862|9173|23705|25924|26253|27063|28984|51311|51744|56729|90865|338442	AGTR2|APBB1|AQP1|ARRB1|CD34|CPB2|EDN1|EDNRB|FCER1G|FCN1|FGR|GATA2|GJA1|GPER1|HLA-E|IL1B|IL6|LPL|NPR1|P2RY1|PLA2G1B|PRKCE|PTGER4|RBP4|CXCL12|SLC6A4|SNCA|SPTBN1|APLN|IL1RL1|CADM1|MYRIP|CLEC4E|ANKRD1|RGCC|TLR8|CD244|RETN|IL33|HCAR2
GO:0045428	2.14627e-05	0.999996	12	52	regulation of nitric oxide biosynthetic process	BP	0.000978005	186|857|947|1906|3043|3553|3569|5740|5806|7099|9314|10365	AGTR2|CAV1|CD34|EDN1|HBB|IL1B|IL6|PTGIS|PTX3|TLR4|KLF4|KLF2
GO:0010634	2.23357e-05	0.999994	19	111	positive regulation of epithelial cell migration	BP	0.0010148	284|306|659|1839|1906|2247|3373|5155|5168|5581|7010|7048|8613|9037|9647|23328|84913|152007|154810	ANGPT1|ANXA3|BMPR2|HBEGF|EDN1|FGF2|HYAL1|PDGFB|ENPP2|PRKCE|TEK|TGFBR2|PLPP3|SEMA5A|PPM1F|SASH1|ATOH8|GLIPR2|AMOTL1
GO:0045637	2.26298e-05	0.999992	25	185	regulation of myeloid cell differentiation	BP	0.00102516	714|1440|2353|2624|3071|3202|4211|5196|5295|6688|6886|7099|7305|7538|7704|9398|9770|11025|51208|51621|81501|84959|130733|133522|146433	C1QC|CSF3|FOS|GATA2|NCKAP1L|HOXA5|MEIS1|PF4|PIK3R1|SPI1|TAL1|TLR4|TYROBP|ZFP36|ZBTB16|CD101|RASSF2|LILRB3|CLDN18|KLF13|DCSTAMP|UBASH3B|TMEM178A|PPARGC1B|IL34
GO:2000181	2.29228e-05	0.999995	15	76	negative regulation of blood vessel morphogenesis	BP	0.0010354	1285|1634|2828|3202|4223|4881|5196|6347|7010|7075|9314|28984|79812|90627|641700	COL4A3|DCN|GPR4|HOXA5|MEOX2|NPR1|PF4|CCL2|TEK|TIE1|KLF4|RGCC|MMRN2|STARD13|ECSCR
GO:0050865	2.34248e-05	0.999989	52	523	regulation of cell activation	BP	0.001055	177|695|857|1178|1268|1326|1490|1960|2207|2268|2294|2615|2621|2624|2852|3071|3133|3142|3553|3569|3575|4332|5155|5295|5588|5592|6347|6403|6441|6622|6693|6935|7048|7056|7099|7128|7356|7704|7940|8013|8654|9173|9308|11326|51744|57864|84106|84959|89780|90865|146722|150372	AGER|BTK|CAV1|CLC|CNR1|MAP3K8|CTGF|EGR3|FCER1G|FGR|FOXF1|LRRC32|GAS6|GATA2|GPER1|NCKAP1L|HLA-E|HLX|IL1B|IL6|IL7R|MNDA|PDGFB|PIK3R1|PRKCQ|PRKG1|CCL2|SELP|SFTPD|SNCA|SPN|ZEB1|TGFBR2|THBD|TLR4|TNFAIP3|SCGB1A1|ZBTB16|LST1|NR4A3|PDE5A|IL1RL1|CD83|VSIG4|CD244|SLC46A2|PRAM1|UBASH3B|WNT3A|IL33|CD300LF|NFAM1
GO:0060420	2.47706e-05	0.999996	12	51	regulation of heart growth	BP	0.00111238	32|1906|2247|2263|2627|2697|5950|6909|6910|7048|7049|23493	ACACB|EDN1|FGF2|FGFR2|GATA6|GJA1|RBP4|TBX2|TBX5|TGFBR2|TGFBR3|HEY2
GO:0014066	2.621e-05	0.999992	22	145	regulation of phosphatidylinositol 3-kinase signaling	BP	0.00117362	284|847|1440|1634|1839|2247|2263|2264|2268|2549|2852|3084|4915|5155|5295|6403|7010|8395|9314|9365|152831|653361	ANGPT1|CAT|CSF3|DCN|HBEGF|FGF2|FGFR2|FGFR4|FGR|GAB1|GPER1|NRG1|NTRK2|PDGFB|PIK3R1|SELP|TEK|PIP5K1B|KLF4|KL|KLB|NCF1
GO:0060047	2.62944e-05	0.99999	32	259	heart contraction	BP	0.001174	153|186|477|482|845|857|1490|1636|1674|1839|1906|2034|2697|2702|3762|3777|4881|5348|6323|6330|6445|6505|6909|7134|7136|8654|8862|9254|10659|23493|27129|53826	ADRB1|AGTR2|ATP1A2|ATP1B2|CASQ2|CAV1|CTGF|ACE|DES|HBEGF|EDN1|EPAS1|GJA1|GJA5|KCNJ5|KCNK3|NPR1|FXYD1|SCN1A|SCN4B|SGCG|SLC1A1|TBX2|TNNC1|TNNI2|PDE5A|APLN|CACNA2D2|CELF2|HEY2|HSPB7|FXYD6
GO:0035082	2.70371e-05	0.999995	12	53	axoneme assembly	BP	0.0012037	27019|27285|50487|51364|55130|64446|89765|92749|139212|221421|345895|387885	DNAI1|TEKT2|PLA2G3|ZMYND10|ARMC4|DNAI2|RSPH1|DRC1|PIH1D3|RSPH9|RSPH4A|CFAP73
GO:0014074	2.81177e-05	0.999991	22	144	response to purine-containing compound	BP	0.00124822	358|366|845|1036|1843|2353|2354|2819|3553|3569|3727|4327|5023|5138|5322|5468|6347|6532|7010|7056|53905|133522	AQP1|AQP9|CASQ2|CDO1|DUSP1|FOS|FOSB|GPD1|IL1B|IL6|JUND|MMP19|P2RX1|PDE2A|PLA2G5|PPARG|CCL2|SLC6A4|TEK|THBD|DUOX1|PPARGC1B
GO:0060193	2.8222e-05	0.999994	13	63	positive regulation of lipase activity	BP	0.00124927	185|728|2247|2263|3491|5319|5322|5581|6401|8698|10316|115727|338328	AGTR1|C5AR1|FGF2|FGFR2|CYR61|PLA2G1B|PLA2G5|PRKCE|SELE|S1PR4|NMUR1|RASGRP4|GPIHBP1
GO:0042692	2.95447e-05	0.999987	41	362	muscle cell differentiation	BP	0.00130409	186|627|650|845|858|1073|1906|1910|2022|2034|2263|2294|2627|2852|3084|4628|4629|5155|6445|6909|6910|6926|6935|7111|7881|8516|9254|9444|10266|10529|23345|23493|27063|30846|58529|79652|89780|91624|144165|255743|341676	AGTR2|BDNF|BMP2|CASQ2|CAV2|CFL2|EDN1|EDNRB|ENG|EPAS1|FGFR2|FOXF1|GATA6|GPER1|NRG1|MYH10|MYH11|PDGFB|SGCG|TBX2|TBX5|TBX3|ZEB1|TMOD1|KCNAB1|ITGA8|CACNA2D2|QKI|RAMP2|NEBL|SYNE1|HEY2|ANKRD1|EHD2|MYOZ1|TMEM204|WNT3A|NEXN|PRICKLE1|NPNT|NEK5
GO:0044236	2.96495e-05	0.999991	21	136	multicellular organism metabolic process	BP	0.001305	153|154|1285|1305|1490|1636|2022|2690|3569|4239|4327|5319|5468|6347|7148|23371|28984|55214|56729|131873|256076	ADRB1|ADRB2|COL4A3|COL13A1|CTGF|ACE|ENG|GHR|IL6|MFAP4|MMP19|PLA2G1B|PPARG|CCL2|TNXB|TNS2|RGCC|P3H2|RETN|COL6A6|COL6A5
GO:0003071	3.05311e-05	0.999997	8	24	renal system process involved in regulation of systemic arterial blood pressure	BP	0.00133838	185|186|2013|2621|2697|2702|5155|5800	AGTR1|AGTR2|EMP2|GAS6|GJA1|GJA5|PDGFB|PTPRO
GO:0050663	3.05807e-05	0.99999	24	174	cytokine secretion	BP	0.00133838	186|284|947|948|2219|2268|2615|2621|3553|3569|4023|5734|6283|6711|7099|9173|23705|26253|28984|51311|51744|58484|90865|338557	AGTR2|ANGPT1|CD34|CD36|FCN1|FGR|LRRC32|GAS6|IL1B|IL6|LPL|PTGER4|S100A12|SPTBN1|TLR4|IL1RL1|CADM1|CLEC4E|RGCC|TLR8|CD244|NLRC4|IL33|FFAR4
GO:1903532	3.30463e-05	0.999986	37	331	positive regulation of secretion by cell	BP	0.00144221	186|322|408|947|1361|1906|2207|2219|2268|2624|2697|2852|3133|3553|3569|4023|5028|5319|5581|5734|5950|6387|6532|6622|6711|8862|9173|23705|25924|26253|27063|28984|51311|51744|56729|90865|338442	AGTR2|APBB1|ARRB1|CD34|CPB2|EDN1|FCER1G|FCN1|FGR|GATA2|GJA1|GPER1|HLA-E|IL1B|IL6|LPL|P2RY1|PLA2G1B|PRKCE|PTGER4|RBP4|CXCL12|SLC6A4|SNCA|SPTBN1|APLN|IL1RL1|CADM1|MYRIP|CLEC4E|ANKRD1|RGCC|TLR8|CD244|RETN|IL33|HCAR2
GO:0072012	3.32026e-05	0.999997	8	24	glomerulus vasculature development	BP	0.00144497	284|947|1958|2828|5155|5175|6943|7010	ANGPT1|CD34|EGR1|GPR4|PDGFB|PECAM1|TCF21|TEK
GO:0006810	3.3851e-05	0.999975	334	4965	transport	BP	0.00146906	2|21|32|154|185|186|240|246|284|306|322|341|358|361|366|408|477|482|554|667|683|695|710|728|761|762|820|845|847|857|858|945|947|948|968|976|1012|1036|1262|1268|1318|1346|1361|1410|1440|1490|1511|1536|1601|1636|1675|1808|1906|1910|1959|2013|2022|2040|2157|2159|2167|2171|2207|2214|2215|2219|2247|2268|2273|2277|2294|2352|2357|2358|2615|2621|2624|2690|2697|2701|2702|2719|2823|2824|2852|2890|3039|3040…	A2M|ABCA3|ACACB|ADRB2|AGTR1|AGTR2|ALOX5|ALOX15|ANGPT1|ANXA3|APBB1|APOC1|AQP1|AQP4|AQP9|ARRB1|ATP1A2|ATP1B2|AVPR2|DST|BST1|BTK|SERPING1|C5AR1|CA3|CA4|CAMP|CASQ2|CAT|CAV1|CAV2|CD33|CD34|CD36|CD68|ADGRE5|CDH13|CDO1|CNGA4|CNR1|SLC31A2|COX7A1|CPB2|CRYAB|CSF3|CTGF|CTSG|CYBB|DAB2|ACE|CFD|DPYSL2|EDN1|EDNRB|EGR2|EMP2|ENG|STOM|F8|F10|FABP4|FABP5|FCER1G|FCGR3A|FCGR3B|FCN1|FGF2|FGR|FHL1|VEGFD|FOXF1|FOLR3|FPR…
GO:0045936	3.41106e-05	0.999983	56	557	negative regulation of phosphate metabolic process	BP	0.00147505	104|284|341|408|467|857|1030|1634|1843|1850|1906|1910|2022|2167|2192|2203|2852|3071|3553|3569|4091|4616|4883|5138|5155|6622|7078|7099|7128|8613|8835|8850|9021|9314|9353|9467|9535|9647|9770|11142|23645|23767|26524|55022|55924|57447|57580|57718|64101|80243|83891|84959|91663|94030|120892|389119	ADARB1|ANGPT1|APOC1|ARRB1|ATF3|CAV1|CDKN2B|DCN|DUSP1|DUSP8|EDN1|EDNRB|ENG|FABP4|FBLN1|FBP1|GPER1|NCKAP1L|IL1B|IL6|SMAD6|GADD45B|NPR3|PDE2A|PDGFB|SNCA|TIMP3|TLR4|TNFAIP3|PLPP3|SOCS2|KAT2B|SOCS3|KLF4|SLIT2|SH3BP5|GMFG|PPM1F|RASSF2|PKIG|PPP1R15A|FLRT3|LATS2|PID1|FAM212B|NDRG2|PREX1|PPP4R4|LRRC4|PREX2|SNX25|UBASH3B|MYADM|LRRC4B|LRRK2|FAM212A
GO:0043434	3.41794e-05	0.999984	43	401	response to peptide hormone	BP	0.00147505	181|185|186|847|857|858|1036|1490|1536|1906|1958|1959|2549|2690|2697|2791|2852|3164|3553|3569|3727|5166|5251|5295|5319|5468|5588|6347|6387|7010|7832|8013|8835|8850|9021|9365|10580|55022|56729|64397|196883|245972|255738	AGRP|AGTR1|AGTR2|CAT|CAV1|CAV2|CDO1|CTGF|CYBB|EDN1|EGR1|EGR2|GAB1|GHR|GJA1|GNG11|GPER1|NR4A1|IL1B|IL6|JUND|PDK4|PHEX|PIK3R1|PLA2G1B|PPARG|PRKCQ|CCL2|CXCL12|TEK|BTG2|NR4A3|SOCS2|KAT2B|SOCS3|KL|SORBS1|PID1|RETN|ZNF106|ADCY4|ATP6V0D2|PCSK9
GO:0010563	3.57786e-05	0.999982	56	558	negative regulation of phosphorus metabolic process	BP	0.00153977	104|284|341|408|467|857|1030|1634|1843|1850|1906|1910|2022|2167|2192|2203|2852|3071|3553|3569|4091|4616|4883|5138|5155|6622|7078|7099|7128|8613|8835|8850|9021|9314|9353|9467|9535|9647|9770|11142|23645|23767|26524|55022|55924|57447|57580|57718|64101|80243|83891|84959|91663|94030|120892|389119	ADARB1|ANGPT1|APOC1|ARRB1|ATF3|CAV1|CDKN2B|DCN|DUSP1|DUSP8|EDN1|EDNRB|ENG|FABP4|FBLN1|FBP1|GPER1|NCKAP1L|IL1B|IL6|SMAD6|GADD45B|NPR3|PDE2A|PDGFB|SNCA|TIMP3|TLR4|TNFAIP3|PLPP3|SOCS2|KAT2B|SOCS3|KLF4|SLIT2|SH3BP5|GMFG|PPM1F|RASSF2|PKIG|PPP1R15A|FLRT3|LATS2|PID1|FAM212B|NDRG2|PREX1|PPP4R4|LRRC4|PREX2|SNX25|UBASH3B|MYADM|LRRC4B|LRRK2|FAM212A
GO:1903522	3.61546e-05	0.999985	33	273	regulation of blood circulation	BP	0.00155164	153|185|186|477|482|554|659|845|857|1490|1636|1674|1839|1906|2034|2697|2702|3762|3777|4881|5023|5348|6330|6505|6909|8654|8862|9254|9732|10659|23493|27129|53826	ADRB1|AGTR1|AGTR2|ATP1A2|ATP1B2|AVPR2|BMPR2|CASQ2|CAV1|CTGF|ACE|DES|HBEGF|EDN1|EPAS1|GJA1|GJA5|KCNJ5|KCNK3|NPR1|P2RX1|FXYD1|SCN4B|SLC1A1|TBX2|PDE5A|APLN|CACNA2D2|DOCK4|CELF2|HEY2|HSPB7|FXYD6
GO:0042743	3.63132e-05	0.999995	10	42	hydrogen peroxide metabolic process	BP	0.00155414	847|1536|2878|3039|3040|3043|4129|6622|53905|90527	CAT|CYBB|GPX3|HBA1|HBA2|HBB|MAOB|SNCA|DUOX1|DUOXA1
GO:0071624	3.88827e-05	0.999996	8	30	positive regulation of granulocyte chemotaxis	BP	0.00165593	728|1906|2920|2921|3071|5196|5473|23604	C5AR1|EDN1|CXCL2|CXCL3|NCKAP1L|PF4|PPBP|DAPK2
GO:0045601	3.89053e-05	0.999995	9	30	regulation of endothelial cell differentiation	BP	0.00165593	94|1003|3553|4855|6935|7122|55273|81575|84913	ACVRL1|CDH5|IL1B|NOTCH4|ZEB1|CLDN5|TMEM100|APOLD1|ATOH8
GO:0001817	3.95694e-05	0.99998	56	584	regulation of cytokine production	BP	0.00167959	177|186|284|408|695|728|947|948|1178|1536|1958|2207|2219|2268|2532|2615|2621|2627|3071|3133|3553|3568|3569|4023|5196|5295|5588|5734|6347|6441|6556|6693|6711|7099|7128|7356|7538|8013|8809|9173|9308|9314|10365|11326|23705|26253|28984|51311|51744|57447|57493|89780|90865|140706|150372|338557	AGER|AGTR2|ANGPT1|ARRB1|BTK|C5AR1|CD34|CD36|CLC|CYBB|EGR1|FCER1G|FCN1|FGR|ACKR1|LRRC32|GAS6|GATA6|NCKAP1L|HLA-E|IL1B|IL5RA|IL6|LPL|PF4|PIK3R1|PRKCQ|PTGER4|CCL2|SFTPD|SLC11A1|SPN|SPTBN1|TLR4|TNFAIP3|SCGB1A1|ZFP36|NR4A3|IL18R1|IL1RL1|CD83|KLF4|KLF2|VSIG4|CADM1|CLEC4E|RGCC|TLR8|CD244|NDRG2|HEG1|WNT3A|IL33|CCM2L|NFAM1|FFAR4
GO:0060038	3.99062e-05	0.999993	11	44	cardiac muscle cell proliferation	BP	0.00168923	2247|2263|2627|2697|5950|6909|6910|7048|7049|23493|65009	FGF2|FGFR2|GATA6|GJA1|RBP4|TBX2|TBX5|TGFBR2|TGFBR3|HEY2|NDRG4
GO:0003151	4.00147e-05	0.999991	14	69	outflow tract morphogenesis	BP	0.00168923	659|2022|2263|2627|2702|4091|6909|6926|7048|7049|7122|23493|54345|64321	BMPR2|ENG|FGFR2|GATA6|GJA5|SMAD6|TBX2|TBX3|TGFBR2|TGFBR3|CLDN5|HEY2|SOX18|SOX17
GO:0010604	4.2419e-05	0.99997	208	2881	positive regulation of macromolecule metabolic process	BP	0.00178586	94|154|177|185|186|246|284|306|322|408|467|554|650|659|728|729|745|857|858|894|947|948|1012|1030|1285|1316|1326|1440|1490|1536|1601|1634|1636|1839|1901|1906|1910|1958|1959|2013|2022|2034|2078|2115|2192|2247|2263|2264|2294|2313|2353|2354|2357|2549|2615|2621|2624|2627|2662|2690|2697|2719|2852|3071|3084|3164|3202|3400|3491|3553|3569|3575|3727|3949|4005|4091|4093|4211|4222|4223|4616|4784|4855|4915|49…	ACVRL1|ADRB2|AGER|AGTR1|AGTR2|ALOX15|ANGPT1|ANXA3|APBB1|ARRB1|ATF3|AVPR2|BMP2|BMPR2|C5AR1|C6|MYRF|CAV1|CAV2|CCND2|CD34|CD36|CDH13|CDKN2B|COL4A3|KLF6|MAP3K8|CSF3|CTGF|CYBB|DAB2|DCN|ACE|HBEGF|S1PR1|EDN1|EDNRB|EGR1|EGR2|EMP2|ENG|EPAS1|ERG|ETV1|FBLN1|FGF2|FGFR2|FGFR4|FOXF1|FLI1|FOS|FOSB|FPR1|GAB1|LRRC32|GAS6|GATA2|GATA6|GDF10|GHR|GJA1|GPC3|GPER1|NCKAP1L|NRG1|NR4A1|HOXA5|ID4|CYR61|IL1B|IL6|IL7R|JUND|L…
GO:0019932	4.30583e-05	0.999983	29	230	second-messenger-mediated signaling	BP	0.00180786	153|185|186|477|683|695|845|948|1012|1827|1906|1910|2357|3084|5138|5196|5592|5737|5739|6401|6403|10316|11069|29995|51196|55273|57158|79625|120892	ADRB1|AGTR1|AGTR2|ATP1A2|BST1|BTK|CASQ2|CD36|CDH13|RCAN1|EDN1|EDNRB|FPR1|NRG1|PDE2A|PF4|PRKG1|PTGFR|PTGIR|SELE|SELP|NMUR1|RAPGEF4|LMCD1|PLCE1|TMEM100|JPH2|NDNF|LRRK2
GO:0006940	4.35536e-05	0.999992	12	55	regulation of smooth muscle contraction	BP	0.00182372	154|477|857|1264|1906|2852|5023|5592|9732|10203|51196|255743	ADRB2|ATP1A2|CAV1|CNN1|EDN1|GPER1|P2RX1|PRKG1|DOCK4|CALCRL|PLCE1|NPNT
GO:0055021	4.39039e-05	0.999992	11	46	regulation of cardiac muscle tissue growth	BP	0.00183343	1906|2247|2263|2627|2697|5950|6909|6910|7048|7049|23493	EDN1|FGF2|FGFR2|GATA6|GJA1|RBP4|TBX2|TBX5|TGFBR2|TGFBR3|HEY2
GO:0010596	4.43203e-05	0.999993	10	39	negative regulation of endothelial cell migration	BP	0.00184585	94|186|1634|2247|4223|9314|9353|28984|79812|90627	ACVRL1|AGTR2|DCN|FGF2|MEOX2|KLF4|SLIT2|RGCC|MMRN2|STARD13
GO:0046622	4.47218e-05	0.999992	11	45	positive regulation of organ growth	BP	0.00185307	32|1906|2247|2263|2627|3142|6909|6910|7049|9254|23493	ACACB|EDN1|FGF2|FGFR2|GATA6|HLX|TBX2|TBX5|TGFBR3|CACNA2D2|HEY2
GO:0090303	4.47331e-05	0.999992	11	48	positive regulation of wound healing	BP	0.00185307	948|1361|1839|4638|5581|6347|6403|7048|7056|7099|8613	CD36|CPB2|HBEGF|MYLK|PRKCE|CCL2|SELP|TGFBR2|THBD|TLR4|PLPP3
GO:2000377	4.49075e-05	0.999985	22	155	regulation of reactive oxygen species metabolic process	BP	0.00185534	185|186|683|857|947|948|1410|1906|3043|3553|3569|5155|5740|5806|6622|7048|7099|9314|10365|10516|55022|90527	AGTR1|AGTR2|BST1|CAV1|CD34|CD36|CRYAB|EDN1|HBB|IL1B|IL6|PDGFB|PTGIS|PTX3|SNCA|TGFBR2|TLR4|KLF4|KLF2|FBLN5|PID1|DUOXA1
GO:1904019	4.73214e-05	0.999988	16	89	epithelial cell apoptotic process	BP	0.00194987	284|659|1285|2621|2852|3569|7010|7048|7128|7466|7538|9037|10266|28984|79625|641700	ANGPT1|BMPR2|COL4A3|GAS6|GPER1|IL6|TEK|TGFBR2|TNFAIP3|WFS1|ZFP36|SEMA5A|RAMP2|RGCC|NDNF|ECSCR
GO:0002688	4.76187e-05	0.999988	16	103	regulation of leukocyte chemotaxis	BP	0.00195692	683|728|1906|2277|2621|2920|2921|3071|3569|5196|5473|6347|6387|9353|23604|83700	BST1|C5AR1|EDN1|VEGFD|GAS6|CXCL2|CXCL3|NCKAP1L|IL6|PF4|PPBP|CCL2|CXCL12|SLIT2|DAPK2|JAM3
GO:0003205	4.85437e-05	0.999984	23	155	cardiac chamber development	BP	0.00198965	659|2022|2263|2294|2627|2702|3084|3340|3491|4091|4628|5950|6909|6910|6926|7010|7048|7049|7134|9510|23493|57493|140706	BMPR2|ENG|FGFR2|FOXF1|GATA6|GJA5|NRG1|NDST1|CYR61|SMAD6|MYH10|RBP4|TBX2|TBX5|TBX3|TEK|TGFBR2|TGFBR3|TNNC1|ADAMTS1|HEY2|HEG1|CCM2L
GO:0043537	5.05427e-05	0.999994	8	25	negative regulation of blood vessel endothelial cell migration	BP	0.00206611	94|186|2247|4223|9314|28984|79812|90627	ACVRL1|AGTR2|FGF2|MEOX2|KLF4|RGCC|MMRN2|STARD13
GO:0019221	5.09434e-05	0.999974	52	564	cytokine-mediated signaling pathway	BP	0.00207702	284|857|1271|1440|1524|1634|1906|1958|2532|2549|2621|2690|2920|2921|3055|3133|3553|3563|3568|3569|3575|3577|3579|3953|3977|5155|5196|5468|5473|6347|6358|6368|6369|6387|6586|7128|8742|8809|8835|9021|9034|9173|9353|23767|25939|51208|51554|53832|53905|64101|94030|146722	ANGPT1|CAV1|CNTFR|CSF3|CX3CR1|DCN|EDN1|EGR1|ACKR1|GAB1|GAS6|GHR|CXCL2|CXCL3|HCK|HLA-E|IL1B|IL3RA|IL5RA|IL6|IL7R|CXCR1|CXCR2|LEPR|LIFR|PDGFB|PF4|PPARG|PPBP|CCL2|CCL14|CCL23|CCL24|CXCL12|SLIT3|TNFAIP3|TNFSF12|IL18R1|SOCS2|SOCS3|CCRL2|IL1RL1|SLIT2|FLRT3|SAMHD1|CLDN18|ACKR4|IL20RA|DUOX1|LRRC4|LRRC4B|CD300LF
GO:0003044	5.31128e-05	0.999991	11	48	regulation of systemic arterial blood pressure mediated by a chemical signal	BP	0.00215539	153|154|185|186|554|1359|1511|1636|1906|2702|4311	ADRB1|ADRB2|AGTR1|AGTR2|AVPR2|CPA3|CTSG|ACE|EDN1|GJA5|MME
GO:0045785	5.31439e-05	0.999975	41	385	positive regulation of cell adhesion	BP	0.00215539	177|246|284|857|948|1012|1326|1842|1960|2013|2294|3071|3133|3142|3373|3491|3553|3569|3575|5295|5581|5588|6347|6387|6693|7010|7048|7402|7704|8013|8613|9308|9647|9806|25890|51744|57580|79625|89780|91663|255743	AGER|ALOX15|ANGPT1|CAV1|CD36|CDH13|MAP3K8|ECM2|EGR3|EMP2|FOXF1|NCKAP1L|HLA-E|HLX|HYAL1|CYR61|IL1B|IL6|IL7R|PIK3R1|PRKCE|PRKCQ|CCL2|CXCL12|SPN|TEK|TGFBR2|UTRN|ZBTB16|NR4A3|PLPP3|CD83|PPM1F|SPOCK2|ABI3BP|CD244|PREX1|NDNF|WNT3A|MYADM|NPNT
GO:0050714	5.41305e-05	0.99998	27	216	positive regulation of protein secretion	BP	0.00218967	186|322|408|947|2219|2268|2697|2852|3133|3553|3569|4023|5319|5581|5734|5950|6711|9173|23705|25924|26253|27063|28984|51311|51744|90865|338442	AGTR2|APBB1|ARRB1|CD34|FCN1|FGR|GJA1|GPER1|HLA-E|IL1B|IL6|LPL|PLA2G1B|PRKCE|PTGER4|RBP4|SPTBN1|IL1RL1|CADM1|MYRIP|CLEC4E|ANKRD1|RGCC|TLR8|CD244|IL33|HCAR2
GO:0052547	5.43006e-05	0.999975	40	397	regulation of peptidase activity	BP	0.00219083	2|358|408|710|857|1285|1473|1490|2192|2621|2719|2852|3491|3569|3730|5023|5468|5627|6590|6622|7078|8434|9314|9647|9806|10395|26577|27074|27151|51232|58189|58484|80760|83595|89780|114769|128488|221476|341676|653145	A2M|AQP1|ARRB1|SERPING1|CAV1|COL4A3|CST5|CTGF|FBLN1|GAS6|GPC3|GPER1|CYR61|IL6|ANOS1|P2RX1|PPARG|PROS1|SLPI|SNCA|TIMP3|RECK|KLF4|PPM1F|SPOCK2|DLC1|PCOLCE2|LAMP3|CPAMD8|CRIM1|WFDC1|NLRC4|ITIH5|SOX7|WNT3A|CARD16|WFDC12|PI16|NEK5|ANXA8
GO:0051234	5.64216e-05	0.999958	340	5092	establishment of localization	BP	0.00227049	2|21|32|154|185|186|240|246|284|306|322|341|358|361|366|408|477|482|554|667|683|695|710|728|761|762|820|845|847|857|858|945|947|948|968|976|1012|1036|1262|1268|1318|1346|1361|1410|1440|1490|1511|1536|1601|1636|1675|1808|1906|1910|1959|2013|2022|2040|2157|2159|2167|2171|2207|2214|2215|2219|2247|2268|2273|2277|2294|2352|2357|2358|2615|2621|2624|2690|2697|2701|2702|2719|2823|2824|2852|2890|3039|3040…	A2M|ABCA3|ACACB|ADRB2|AGTR1|AGTR2|ALOX5|ALOX15|ANGPT1|ANXA3|APBB1|APOC1|AQP1|AQP4|AQP9|ARRB1|ATP1A2|ATP1B2|AVPR2|DST|BST1|BTK|SERPING1|C5AR1|CA3|CA4|CAMP|CASQ2|CAT|CAV1|CAV2|CD33|CD34|CD36|CD68|ADGRE5|CDH13|CDO1|CNGA4|CNR1|SLC31A2|COX7A1|CPB2|CRYAB|CSF3|CTGF|CTSG|CYBB|DAB2|ACE|CFD|DPYSL2|EDN1|EDNRB|EGR2|EMP2|ENG|STOM|F8|F10|FABP4|FABP5|FCER1G|FCGR3A|FCGR3B|FCN1|FGF2|FGR|FHL1|VEGFD|FOXF1|FOLR3|FPR…
GO:0003171	5.70968e-05	0.999994	8	24	atrioventricular valve development	BP	0.00229171	650|659|2702|3491|4091|6910|7048|23493	BMP2|BMPR2|GJA5|CYR61|SMAD6|TBX5|TGFBR2|HEY2
GO:2000351	5.83542e-05	0.999991	10	40	regulation of endothelial cell apoptotic process	BP	0.00233613	284|2621|2852|7010|7128|9037|10266|28984|79625|641700	ANGPT1|GAS6|GPER1|TEK|TNFAIP3|SEMA5A|RAMP2|RGCC|NDNF|ECSCR
GO:1901701	5.96746e-05	0.999965	84	970	cellular response to oxygen-containing compound	BP	0.00238283	177|185|186|358|366|408|687|695|857|858|948|1361|1440|1511|1524|1536|1906|1910|1958|2353|2549|2621|2690|2791|2819|2852|3055|3164|3553|3569|3949|4360|4915|5138|5155|5166|5251|5295|5319|5468|5581|5588|5734|5737|6347|6532|6622|6688|6751|6935|7099|7128|7538|8013|8322|8835|8850|9021|9314|9353|9365|9450|10203|10268|10365|10516|10580|23328|25959|27063|27244|28999|51092|55022|57088|64397|81035|89780|1208…	AGER|AGTR1|AGTR2|AQP1|AQP9|ARRB1|KLF9|BTK|CAV1|CAV2|CD36|CPB2|CSF3|CTSG|CX3CR1|CYBB|EDN1|EDNRB|EGR1|FOS|GAB1|GAS6|GHR|GNG11|GPD1|GPER1|HCK|NR4A1|IL1B|IL6|LDLR|MRC1|NTRK2|PDE2A|PDGFB|PDK4|PHEX|PIK3R1|PLA2G1B|PPARG|PRKCE|PRKCQ|PTGER4|PTGFR|CCL2|SLC6A4|SNCA|SPI1|SSTR1|ZEB1|TLR4|TNFAIP3|ZFP36|NR4A3|FZD4|SOCS2|KAT2B|SOCS3|KLF4|SLIT2|KL|LY86|CALCRL|RAMP3|KLF2|FBLN5|SORBS1|SASH1|KANK2|ANKRD1|SESN1|KLF15…
GO:0042744	6.10468e-05	0.999994	7	22	hydrogen peroxide catabolic process	BP	0.00243136	847|2878|3039|3040|3043|6622|53905	CAT|GPX3|HBA1|HBA2|HBB|SNCA|DUOX1
GO:1904035	6.14797e-05	0.999987	13	64	regulation of epithelial cell apoptotic process	BP	0.00244232	284|2621|2852|3569|7010|7128|7466|7538|9037|10266|28984|79625|641700	ANGPT1|GAS6|GPER1|IL6|TEK|TNFAIP3|WFS1|ZFP36|SEMA5A|RAMP2|RGCC|NDNF|ECSCR
GO:1902624	6.21314e-05	0.999993	8	30	positive regulation of neutrophil migration	BP	0.002456	728|1906|2920|2921|3071|5196|5473|23604	C5AR1|EDN1|CXCL2|CXCL3|NCKAP1L|PF4|PPBP|DAPK2
GO:0070286	6.2141e-05	0.999993	8	27	axonemal dynein complex assembly	BP	0.002456	27019|27285|51364|55130|64446|92749|139212|387885	DNAI1|TEKT2|ZMYND10|ARMC4|DNAI2|DRC1|PIH1D3|CFAP73
GO:1905207	6.25019e-05	0.99999	10	39	regulation of cardiocyte differentiation	BP	0.00246398	650|1906|2627|2852|3084|6910|23493|64321|89780|144165	BMP2|EDN1|GATA6|GPER1|NRG1|TBX5|HEY2|SOX17|WNT3A|PRICKLE1
GO:0060429	6.54669e-05	0.99996	98	1216	epithelium development	BP	0.00257431	94|186|650|659|847|857|947|1003|1601|1839|1901|1906|2022|2247|2263|2294|2627|2697|2701|2702|2719|2828|3084|3202|3400|3491|3553|3569|3851|4091|4093|4222|4223|4855|4919|5138|5155|5175|5468|5800|6092|6909|6910|6926|6935|6943|7048|7051|7111|7122|7538|8322|8796|9021|9079|9314|9353|9496|9839|10365|10395|23254|23493|23764|23767|25928|26084|26524|28999|51092|54345|54507|54922|55273|57493|59277|64321|6439…	ACVRL1|AGTR2|BMP2|BMPR2|CAT|CAV1|CD34|CDH5|DAB2|HBEGF|S1PR1|EDN1|ENG|FGF2|FGFR2|FOXF1|GATA6|GJA1|GJA4|GJA5|GPC3|GPR4|NRG1|HOXA5|ID4|CYR61|IL1B|IL6|KRT4|SMAD6|SMAD9|MEOX1|MEOX2|NOTCH4|ROR1|PDE2A|PDGFB|PECAM1|PPARG|PTPRO|ROBO2|TBX2|TBX5|TBX3|ZEB1|TCF21|TGFBR2|TGM1|TMOD1|CLDN5|ZFP36|FZD4|SCEL|SOCS3|LDB2|KLF4|SLIT2|TBX4|ZEB2|KLF2|DLC1|KAZN|HEY2|MAFF|FLRT3|SOSTDC1|ARHGEF26|LATS2|KLF15|SIDT2|SOX18|ADAM…
GO:0044708	6.89252e-05	0.999967	43	405	single-organism behavior	BP	0.00270344	104|181|186|477|590|894|1268|1524|1959|2115|2353|2697|2890|3569|4045|4900|4915|5153|5581|5730|5923|6323|6387|6446|6532|6622|7111|7122|7466|7832|7881|8013|8516|8528|11346|23237|27253|53358|65009|80243|85358|120892|163175	ADARB1|AGRP|AGTR2|ATP1A2|BCHE|CCND2|CNR1|CX3CR1|EGR2|ETV1|FOS|GJA1|GRIA1|IL6|LSAMP|NRGN|NTRK2|PDE1B|PRKCE|PTGDS|RASGRF1|SCN1A|CXCL12|SGK1|SLC6A4|SNCA|TMOD1|CLDN5|WFS1|BTG2|KCNAB1|NR4A3|ITGA8|DDO|SYNPO|ARC|PCDH17|SHC3|NDRG4|PREX2|SHANK3|LRRK2|LGI4
GO:0061437	7.02294e-05	0.999992	8	26	renal system vasculature development	BP	0.00274072	284|947|1958|2828|5155|5175|6943|7010	ANGPT1|CD34|EGR1|GPR4|PDGFB|PECAM1|TCF21|TEK
GO:0061440	7.02294e-05	0.999992	8	26	kidney vasculature development	BP	0.00274072	284|947|1958|2828|5155|5175|6943|7010	ANGPT1|CD34|EGR1|GPR4|PDGFB|PECAM1|TCF21|TEK
GO:0035051	7.22157e-05	0.999978	19	121	cardiocyte differentiation	BP	0.00281115	186|650|1906|2627|2852|3084|4628|4629|6909|6910|6926|7049|10529|23493|54345|64321|89780|91624|144165	AGTR2|BMP2|EDN1|GATA6|GPER1|NRG1|MYH10|MYH11|TBX2|TBX5|TBX3|TGFBR3|NEBL|HEY2|SOX18|SOX17|WNT3A|NEXN|PRICKLE1
GO:0051493	7.43565e-05	0.999964	45	426	regulation of cytoskeleton organization	BP	0.00288723	246|395|683|1073|1440|1490|1901|1906|2824|3055|3071|5295|5581|5734|6369|6387|6622|6711|7010|7111|9037|9353|9535|9647|9912|10174|10395|10763|11346|22899|25802|28984|54959|57580|83700|85358|85458|89780|90102|91624|91663|93663|130271|171024|401236	ALOX15|ARHGAP6|BST1|CFL2|CSF3|CTGF|S1PR1|EDN1|GPM6B|HCK|NCKAP1L|PIK3R1|PRKCE|PTGER4|CCL24|CXCL12|SNCA|SPTBN1|TEK|TMOD1|SEMA5A|SLIT2|GMFG|PPM1F|ARHGAP44|SORBS3|DLC1|NES|SYNPO|ARHGEF15|LMOD1|RGCC|ODAM|PREX1|JAM3|SHANK3|DIXDC1|WNT3A|PHLDB2|NEXN|MYADM|ARHGAP18|PLEKHH2|SYNPO2|STMND1
GO:0032870	7.49655e-05	0.99996	59	621	cellular response to hormone stimulus	BP	0.0029036	181|185|186|358|477|554|687|857|858|1601|1843|1906|2353|2354|2549|2627|2690|2791|2852|3164|3553|3569|3727|3953|4005|5166|5251|5295|5319|5468|5581|5588|5734|5737|6092|6258|6347|6586|6751|6943|7538|8013|8835|8850|9021|9353|9365|10266|10580|25959|26524|55022|57658|64397|133522|167465|196883|245972|255738	AGRP|AGTR1|AGTR2|AQP1|ATP1A2|AVPR2|KLF9|CAV1|CAV2|DAB2|DUSP1|EDN1|FOS|FOSB|GAB1|GATA6|GHR|GNG11|GPER1|NR4A1|IL1B|IL6|JUND|LEPR|LMO2|PDK4|PHEX|PIK3R1|PLA2G1B|PPARG|PRKCE|PRKCQ|PTGER4|PTGFR|ROBO2|RXRG|CCL2|SLIT3|SSTR1|TCF21|ZFP36|NR4A3|SOCS2|KAT2B|SOCS3|SLIT2|KL|RAMP2|SORBS1|KANK2|LATS2|PID1|CALCOCO1|ZNF106|PPARGC1B|ZNF366|ADCY4|ATP6V0D2|PCSK9
GO:0014855	7.51902e-05	0.999985	12	55	striated muscle cell proliferation	BP	0.00290504	284|2247|2263|2627|2697|5950|6909|6910|7048|7049|23493|65009	ANGPT1|FGF2|FGFR2|GATA6|GJA1|RBP4|TBX2|TBX5|TGFBR2|TGFBR3|HEY2|NDRG4
GO:0003197	7.57614e-05	0.999988	10	39	endocardial cushion development	BP	0.00291983	94|650|659|2022|2078|2294|6909|6910|7048|55273	ACVRL1|BMP2|BMPR2|ENG|ERG|FOXF1|TBX2|TBX5|TGFBR2|TMEM100
GO:1903426	7.67851e-05	0.999983	13	68	regulation of reactive oxygen species biosynthetic process	BP	0.00295194	186|857|947|1906|3043|3553|3569|5740|5806|6622|7099|9314|10365	AGTR2|CAV1|CD34|EDN1|HBB|IL1B|IL6|PTGIS|PTX3|SNCA|TLR4|KLF4|KLF2
GO:0042310	7.75411e-05	0.999982	14	74	vasoconstriction	BP	0.00297363	185|477|554|659|857|1636|1906|1910|2697|2702|5023|6532|8862|9732	AGTR1|ATP1A2|AVPR2|BMPR2|CAV1|ACE|EDN1|EDNRB|GJA1|GJA5|P2RX1|SLC6A4|APLN|DOCK4
GO:0045124	7.93918e-05	0.999989	9	34	regulation of bone resorption	BP	0.00303708	1901|3569|5166|7128|51208|53832|81501|84959|133522	S1PR1|IL6|PDK4|TNFAIP3|CLDN18|IL20RA|DCSTAMP|UBASH3B|PPARGC1B
GO:0060411	7.98193e-05	0.999982	13	63	cardiac septum morphogenesis	BP	0.00304591	659|2022|2263|2627|2702|3491|4091|6909|6910|6926|7048|7049|23493	BMPR2|ENG|FGFR2|GATA6|GJA5|CYR61|SMAD6|TBX2|TBX5|TBX3|TGFBR2|TGFBR3|HEY2
GO:1902932	8.10138e-05	0.999992	7	21	positive regulation of alcohol biosynthetic process	BP	0.0030839	2852|3553|5028|5745|6622|9619|51744	GPER1|IL1B|P2RY1|PTH1R|SNCA|ABCG1|CD244
GO:0050707	8.14169e-05	0.999973	21	151	regulation of cytokine secretion	BP	0.00309165	186|284|947|2219|2268|2615|2621|3553|3569|4023|5734|6711|7099|9173|23705|26253|28984|51311|51744|90865|338557	AGTR2|ANGPT1|CD34|FCN1|FGR|LRRC32|GAS6|IL1B|IL6|LPL|PTGER4|SPTBN1|TLR4|IL1RL1|CADM1|CLEC4E|RGCC|TLR8|CD244|IL33|FFAR4
GO:0032835	8.18858e-05	0.999982	13	63	glomerulus development	BP	0.00310185	186|284|947|1285|1958|2828|5155|5175|5800|6943|7010|28999|51196	AGTR2|ANGPT1|CD34|COL4A3|EGR1|GPR4|PDGFB|PECAM1|PTPRO|TCF21|TEK|KLF15|PLCE1
GO:0061383	8.37496e-05	0.999984	11	48	trabecula morphogenesis	BP	0.00316471	1901|2022|3084|5950|7010|7049|9510|23493|57493|133522|140706	S1PR1|ENG|NRG1|RBP4|TEK|TGFBR3|ADAMTS1|HEY2|HEG1|PPARGC1B|CCM2L
GO:0002793	8.52823e-05	0.999966	28	235	positive regulation of peptide secretion	BP	0.00321479	186|322|408|947|2219|2268|2697|2852|3133|3553|3569|4023|5319|5581|5734|5950|6711|8862|9173|23705|25924|26253|27063|28984|51311|51744|90865|338442	AGTR2|APBB1|ARRB1|CD34|FCN1|FGR|GJA1|GPER1|HLA-E|IL1B|IL6|LPL|PLA2G1B|PRKCE|PTGER4|RBP4|SPTBN1|APLN|IL1RL1|CADM1|MYRIP|CLEC4E|ANKRD1|RGCC|TLR8|CD244|IL33|HCAR2
GO:0043112	8.73122e-05	0.99997	22	155	receptor metabolic process	BP	0.00327765	284|408|857|948|1906|2207|2890|3084|3202|3577|3579|5468|6401|6456|6622|10203|10266|10268|83891|89780|255738|284654	ANGPT1|ARRB1|CAV1|CD36|EDN1|FCER1G|GRIA1|NRG1|HOXA5|CXCR1|CXCR2|PPARG|SELE|SH3GL2|SNCA|CALCRL|RAMP2|RAMP3|SNX25|WNT3A|PCSK9|RSPO1
GO:0048017	8.7373e-05	0.999966	27	209	inositol lipid-mediated signaling	BP	0.00327765	284|847|1440|1634|1839|1906|2247|2263|2264|2268|2549|2852|3084|4883|4915|5155|5295|6403|7010|8395|9314|9365|23533|80243|152831|388121|653361	ANGPT1|CAT|CSF3|DCN|HBEGF|EDN1|FGF2|FGFR2|FGFR4|FGR|GAB1|GPER1|NRG1|NPR3|NTRK2|PDGFB|PIK3R1|SELP|TEK|PIP5K1B|KLF4|KL|PIK3R5|PREX2|KLB|TNFAIP8L3|NCF1
GO:0055025	8.86885e-05	0.999985	10	40	positive regulation of cardiac muscle tissue development	BP	0.00331896	1906|2247|2263|2627|3084|6909|6910|7049|23493|89780	EDN1|FGF2|FGFR2|GATA6|NRG1|TBX2|TBX5|TGFBR3|HEY2|WNT3A
GO:0048871	8.8917e-05	0.99996	37	335	multicellular organismal homeostasis	BP	0.0033195	32|33|153|154|358|361|554|947|948|1268|1490|1901|1910|2034|2624|3553|3569|3953|3988|5166|5745|5950|6441|6556|7099|7128|7466|8013|8862|9079|23371|51208|53832|81501|84959|133522|196883	ACACB|ACADL|ADRB1|ADRB2|AQP1|AQP4|AVPR2|CD34|CD36|CNR1|CTGF|S1PR1|EDNRB|EPAS1|GATA2|IL1B|IL6|LEPR|LIPA|PDK4|PTH1R|RBP4|SFTPD|SLC11A1|TLR4|TNFAIP3|WFS1|NR4A3|APLN|LDB2|TNS2|CLDN18|IL20RA|DCSTAMP|UBASH3B|PPARGC1B|ADCY4
GO:0001818	8.96452e-05	0.999965	27	222	negative regulation of cytokine production	BP	0.00333864	177|284|408|695|947|2615|2621|2627|3071|3569|5734|6441|6556|7099|7128|7356|7538|9173|9308|9314|10365|11326|28984|51311|57447|90865|338557	AGER|ANGPT1|ARRB1|BTK|CD34|LRRC32|GAS6|GATA6|NCKAP1L|IL6|PTGER4|SFTPD|SLC11A1|TLR4|TNFAIP3|SCGB1A1|ZFP36|IL1RL1|CD83|KLF4|KLF2|VSIG4|RGCC|TLR8|NDRG2|IL33|FFAR4
GO:0001554	9.23585e-05	0.999999	4	5	luteolysis	BP	0.00342401	4327|6092|6586|9353	MMP19|ROBO2|SLIT3|SLIT2
GO:0030099	9.23796e-05	0.999958	36	333	myeloid cell differentiation	BP	0.00342401	714|1030|1440|2034|2313|2353|2624|2719|3071|3202|4211|5153|5196|5295|5468|6688|6886|7048|7049|7099|7305|7538|7704|9398|9770|10365|11025|51208|51621|54861|81501|84959|115727|130733|133522|146433	C1QC|CDKN2B|CSF3|EPAS1|FLI1|FOS|GATA2|GPC3|NCKAP1L|HOXA5|MEIS1|PDE1B|PF4|PIK3R1|PPARG|SPI1|TAL1|TGFBR2|TGFBR3|TLR4|TYROBP|ZFP36|ZBTB16|CD101|RASSF2|KLF2|LILRB3|CLDN18|KLF13|SNRK|DCSTAMP|UBASH3B|RASGRP4|TMEM178A|PPARGC1B|IL34
GO:0060421	9.26973e-05	0.999986	9	33	positive regulation of heart growth	BP	0.00342759	32|1906|2247|2263|2627|6909|6910|7049|23493	ACACB|EDN1|FGF2|FGFR2|GATA6|TBX2|TBX5|TGFBR3|HEY2
GO:0071715	9.61198e-05	0.999983	10	45	icosanoid transport	BP	0.00353725	186|1636|1906|3553|5319|5320|5322|6578|50487|255189	AGTR2|ACE|EDN1|IL1B|PLA2G1B|PLA2G2A|PLA2G5|SLCO2A1|PLA2G3|PLA2G4F
GO:1901571	9.61198e-05	0.999983	10	45	fatty acid derivative transport	BP	0.00353725	186|1636|1906|3553|5319|5320|5322|6578|50487|255189	AGTR2|ACE|EDN1|IL1B|PLA2G1B|PLA2G2A|PLA2G5|SLCO2A1|PLA2G3|PLA2G4F
GO:0019229	9.90624e-05	0.999979	12	58	regulation of vasoconstriction	BP	0.00363643	185|477|554|659|857|1636|1906|2697|2702|5023|8862|9732	AGTR1|ATP1A2|AVPR2|BMPR2|CAV1|ACE|EDN1|GJA1|GJA5|P2RX1|APLN|DOCK4
GO:0080134	9.92843e-05	0.999937	105	1308	regulation of response to stress	BP	0.00363643	2|177|185|322|650|683|695|710|728|729|730|732|857|947|948|1268|1361|1410|1490|1524|1839|1906|1910|2160|2167|2207|2219|2247|2268|2294|2549|2697|2852|3055|3133|3384|3553|3569|3949|4023|4616|4638|5138|5155|5199|5243|5295|5320|5468|5581|5588|5592|5627|5734|5740|6283|6347|6369|6387|6401|6403|6441|6693|7010|7048|7056|7099|7128|7356|7466|8013|8322|8613|8685|9021|9173|9314|9770|9839|10203|10516|23328|236…	A2M|AGER|AGTR1|APBB1|BMP2|BST1|BTK|SERPING1|C5AR1|C6|C7|C8B|CAV1|CD34|CD36|CNR1|CPB2|CRYAB|CTGF|CX3CR1|HBEGF|EDN1|EDNRB|F11|FABP4|FCER1G|FCN1|FGF2|FGR|FOXF1|GAB1|GJA1|GPER1|HCK|HLA-E|ICAM2|IL1B|IL6|LDLR|LPL|GADD45B|MYLK|PDE2A|PDGFB|CFP|ABCB1|PIK3R1|PLA2G2A|PPARG|PRKCE|PRKCQ|PRKG1|PROS1|PTGER4|PTGIS|S100A12|CCL2|CCL24|CXCL12|SELE|SELP|SFTPD|SPN|TEK|TGFBR2|THBD|TLR4|TNFAIP3|SCGB1A1|WFS1|NR4A3|FZD4|…
GO:0046850	0.000103144	0.999982	10	42	regulation of bone remodeling	BP	0.00376891	1901|3569|3953|5166|7128|51208|53832|81501|84959|133522	S1PR1|IL6|LEPR|PDK4|TNFAIP3|CLDN18|IL20RA|DCSTAMP|UBASH3B|PPARGC1B
GO:0006837	0.000104216	0.999992	6	16	serotonin transport	BP	0.00379776	2207|2824|4129|5023|6532|6622	FCER1G|GPM6B|MAOB|P2RX1|SLC6A4|SNCA
GO:0051046	0.000104424	0.999942	62	684	regulation of secretion	BP	0.00379776	185|186|284|322|358|408|554|947|1268|1361|1906|1910|2207|2219|2268|2294|2615|2621|2624|2697|2702|2852|3084|3133|3553|3569|4023|4129|4881|5028|5319|5581|5734|5950|6387|6446|6532|6622|6711|7099|8622|8862|9173|9254|11069|23705|25924|26253|27063|28984|29091|51092|51311|51744|56729|80223|84106|90865|120892|203190|338442|338557	AGTR1|AGTR2|ANGPT1|APBB1|AQP1|ARRB1|AVPR2|CD34|CNR1|CPB2|EDN1|EDNRB|FCER1G|FCN1|FGR|FOXF1|LRRC32|GAS6|GATA2|GJA1|GJA5|GPER1|NRG1|HLA-E|IL1B|IL6|LPL|MAOB|NPR1|P2RY1|PLA2G1B|PRKCE|PTGER4|RBP4|CXCL12|SGK1|SLC6A4|SNCA|SPTBN1|TLR4|PDE8B|APLN|IL1RL1|CACNA2D2|RAPGEF4|CADM1|MYRIP|CLEC4E|ANKRD1|RGCC|STXBP6|SIDT2|TLR8|CD244|RETN|RAB11FIP1|PRAM1|IL33|LRRK2|LGI3|HCAR2|FFAR4
GO:0045453	0.000106663	0.999979	11	51	bone resorption	BP	0.00387011	154|1901|3569|5166|5745|7128|51208|53832|81501|84959|133522	ADRB2|S1PR1|IL6|PDK4|PTH1R|TNFAIP3|CLDN18|IL20RA|DCSTAMP|UBASH3B|PPARGC1B
GO:0003094	0.000107094	0.999989	7	21	glomerular filtration	BP	0.00387139	947|2013|2621|2697|2702|5155|5800	CD34|EMP2|GAS6|GJA1|GJA5|PDGFB|PTPRO
GO:0043277	0.000107198	0.999984	9	35	apoptotic cell clearance	BP	0.00387139	246|948|2219|2621|6347|8547|8685|146722|375033	ALOX15|CD36|FCN1|GAS6|CCL2|FCN3|MARCO|CD300LF|PEAR1
GO:0050776	0.000109743	0.999934	80	971	regulation of immune response	BP	0.00395406	2|177|246|284|695|710|712|713|714|728|729|730|732|857|945|947|948|1178|1268|1511|1675|2206|2207|2214|2219|2268|2294|2353|2357|2358|2624|3055|3071|3133|3142|3384|3553|3569|3575|4332|5199|5295|5319|5468|5581|5588|5627|6441|6556|6693|7099|7128|7305|8013|8547|8685|9021|9173|9473|10871|11326|23705|25939|26253|27036|28984|51311|51348|58484|81035|84106|90865|120425|126014|146722|146894|150372|342510|653…	A2M|AGER|ALOX15|ANGPT1|BTK|SERPING1|C1QA|C1QB|C1QC|C5AR1|C6|C7|C8B|CAV1|CD33|CD34|CD36|CLC|CNR1|CTSG|CFD|MS4A2|FCER1G|FCGR3A|FCN1|FGR|FOXF1|FOS|FPR1|FPR2|GATA2|HCK|NCKAP1L|HLA-E|HLX|ICAM2|IL1B|IL6|IL7R|MNDA|CFP|PIK3R1|PLA2G1B|PPARG|PRKCE|PRKCQ|PROS1|SFTPD|SLC11A1|SPN|TLR4|TNFAIP3|TYROBP|NR4A3|FCN3|MARCO|SOCS3|IL1RL1|THEMIS2|CD300C|VSIG4|CADM1|SAMHD1|CLEC4E|SIGLEC7|RGCC|TLR8|KLRF1|NLRC4|COLEC12|PR…
GO:0046456	0.000111639	0.99998	10	47	icosanoid biosynthetic process	BP	0.00400257	240|241|246|1906|5319|5322|5730|5740|27306|255189	ALOX5|ALOX5AP|ALOX15|EDN1|PLA2G1B|PLA2G5|PTGDS|PTGIS|HPGDS|PLA2G4F
GO:1901570	0.000111639	0.99998	10	47	fatty acid derivative biosynthetic process	BP	0.00400257	240|241|246|1906|5319|5322|5730|5740|27306|255189	ALOX5|ALOX5AP|ALOX15|EDN1|PLA2G1B|PLA2G5|PTGDS|PTGIS|HPGDS|PLA2G4F
GO:0002761	0.000112295	0.999967	17	110	regulation of myeloid leukocyte differentiation	BP	0.00400257	714|2353|2624|5196|5295|6886|7099|7305|9398|9770|11025|51208|81501|84959|130733|133522|146433	C1QC|FOS|GATA2|PF4|PIK3R1|TAL1|TLR4|TYROBP|CD101|RASSF2|LILRB3|CLDN18|DCSTAMP|UBASH3B|TMEM178A|PPARGC1B|IL34
GO:0001578	0.000112447	0.999972	14	77	microtubule bundle formation	BP	0.00400257	11076|27019|27285|50487|51364|51673|55130|64446|89765|92749|139212|221421|345895|387885	TPPP|DNAI1|TEKT2|PLA2G3|ZMYND10|TPPP3|ARMC4|DNAI2|RSPH1|DRC1|PIH1D3|RSPH9|RSPH4A|CFAP73
GO:0023057	0.000112615	0.999929	100	1218	negative regulation of signaling	BP	0.00400257	154|177|186|408|467|590|650|845|857|858|1601|1634|1839|1843|1850|1906|1958|2192|2203|2621|2624|2719|2852|2890|3084|3553|3569|4091|5155|5196|5468|5588|5739|5800|6387|6425|6456|6532|6586|6622|6943|7048|7049|7078|7099|7128|7466|7957|8622|8787|8835|8994|9021|9173|9314|9353|9770|9912|10395|11197|23493|23645|23767|25928|25959|26153|26166|26524|27123|27244|27253|55022|57447|57580|64101|64321|64399|64407…	ADRB2|AGER|AGTR2|ARRB1|ATF3|BCHE|BMP2|CASQ2|CAV1|CAV2|DAB2|DCN|HBEGF|DUSP1|DUSP8|EDN1|EGR1|FBLN1|FBP1|GAS6|GATA2|GPC3|GPER1|GRIA1|NRG1|IL1B|IL6|SMAD6|PDGFB|PF4|PPARG|PRKCQ|PTGIR|PTPRO|CXCL12|SFRP5|SH3GL2|SLC6A4|SLIT3|SNCA|TCF21|TGFBR2|TGFBR3|TIMP3|TLR4|TNFAIP3|WFS1|EPM2A|PDE8B|RGS9|SOCS2|LIMD1|SOCS3|IL1RL1|KLF4|SLIT2|RASSF2|ARHGAP44|DLC1|WIF1|HEY2|PPP1R15A|FLRT3|SOSTDC1|KANK2|KIF26A|RGS22|LATS2|D…
GO:0070278	0.000112639	0.999997	4	6	extracellular matrix constituent secretion	BP	0.00400257	1361|1490|2022|28984	CPB2|CTGF|ENG|RGCC
GO:0071402	0.000113991	0.999991	6	16	cellular response to lipoprotein particle stimulus	BP	0.0040326	948|1012|2207|3949|4023|6347	CD36|CDH13|FCER1G|LDLR|LPL|CCL2
GO:0055078	0.000114005	0.99998	10	44	sodium ion homeostasis	BP	0.0040326	185|186|477|482|554|730|1906|1910|4881|6332	AGTR1|AGTR2|ATP1A2|ATP1B2|AVPR2|C7|EDN1|EDNRB|NPR1|SCN7A
GO:0030185	0.000114982	1	3	3	nitric oxide transport	BP	0.00405788	358|1906|3043	AQP1|EDN1|HBB
GO:0010744	0.000119087	0.999991	6	16	positive regulation of macrophage derived foam cell differentiation	BP	0.0041932	185|948|4023|4481|5196|5320	AGTR1|CD36|LPL|MSR1|PF4|PLA2G2A
GO:0010466	0.000119574	0.999952	27	244	negative regulation of peptidase activity	BP	0.00420081	2|358|408|710|1285|1473|2621|2719|3569|3730|5627|6590|6622|7078|8434|9314|9806|27074|27151|51232|58189|58484|80760|114769|128488|221476|653145	A2M|AQP1|ARRB1|SERPING1|COL4A3|CST5|GAS6|GPC3|IL6|ANOS1|PROS1|SLPI|SNCA|TIMP3|RECK|KLF4|SPOCK2|LAMP3|CPAMD8|CRIM1|WFDC1|NLRC4|ITIH5|CARD16|WFDC12|PI16|ANXA8
GO:0045638	0.000124189	0.999969	14	85	negative regulation of myeloid cell differentiation	BP	0.00435307	714|2624|3202|4211|5196|5295|7099|7538|7704|11025|51208|51621|84959|130733	C1QC|GATA2|HOXA5|MEIS1|PF4|PIK3R1|TLR4|ZFP36|ZBTB16|LILRB3|CLDN18|KLF13|UBASH3B|TMEM178A
GO:0071560	0.000125694	0.99995	27	214	cellular response to transforming growth factor beta stimulus	BP	0.00439559	94|857|858|1003|1030|1524|1601|1906|2022|2353|2662|4091|4093|5138|5155|6347|6935|7044|7048|7049|7122|7123|8425|8516|27063|83891|255743	ACVRL1|CAV1|CAV2|CDH5|CDKN2B|CX3CR1|DAB2|EDN1|ENG|FOS|GDF10|SMAD6|SMAD9|PDE2A|PDGFB|CCL2|ZEB1|LEFTY2|TGFBR2|TGFBR3|CLDN5|CLEC3B|LTBP4|ITGA8|ANKRD1|SNX25|NPNT
GO:0010743	0.000125969	0.999983	8	29	regulation of macrophage derived foam cell differentiation	BP	0.00439559	185|948|4023|4481|5196|5320|5468|9619	AGTR1|CD36|LPL|MSR1|PF4|PLA2G2A|PPARG|ABCG1
GO:2001057	0.000127861	0.99997	13	71	reactive nitrogen species metabolic process	BP	0.00445157	186|857|947|1906|3043|3553|3569|5740|5806|7099|9314|10365|54996	AGTR2|CAV1|CD34|EDN1|HBB|IL1B|IL6|PTGIS|PTX3|TLR4|KLF4|KLF2|MARC2
GO:0006939	0.000132611	0.999963	16	97	smooth muscle contraction	BP	0.00460449	154|477|857|1264|1906|1910|2852|4629|4638|5023|5592|9732|10203|10316|51196|255743	ADRB2|ATP1A2|CAV1|CNN1|EDN1|EDNRB|GPER1|MYH11|MYLK|P2RX1|PRKG1|DOCK4|CALCRL|NMUR1|PLCE1|NPNT
GO:0010811	0.000132847	0.999961	17	106	positive regulation of cell-substrate adhesion	BP	0.00460449	246|948|1012|1842|2013|2294|3491|5581|7010|7402|9647|9806|25890|57580|79625|91663|255743	ALOX15|CD36|CDH13|ECM2|EMP2|FOXF1|CYR61|PRKCE|TEK|UTRN|PPM1F|SPOCK2|ABI3BP|PREX1|NDNF|MYADM|NPNT
GO:0009612	0.000135028	0.999947	26	205	response to mechanical stimulus	BP	0.00466963	358|477|1634|1906|2022|2115|2353|2354|2697|3553|3569|3727|5028|5138|5468|5734|6323|6347|6387|7048|7099|7832|27063|51311|56729|85358	AQP1|ATP1A2|DCN|EDN1|ENG|ETV1|FOS|FOSB|GJA1|IL1B|IL6|JUND|P2RY1|PDE2A|PPARG|PTGER4|SCN1A|CCL2|CXCL12|TGFBR2|TLR4|BTG2|ANKRD1|TLR8|RETN|SHANK3
GO:0051248	0.000136633	0.999916	88	1076	negative regulation of protein metabolic process	BP	0.00470772	2|104|284|322|358|408|467|710|857|1030|1285|1361|1410|1473|1634|1839|1843|1850|1906|1910|2022|2167|2192|2621|2719|2852|3071|3084|3553|3569|3730|4091|4616|5581|5627|5806|6441|6590|6622|6688|7078|7099|7128|7538|7832|8434|8613|8835|8850|8994|9021|9314|9353|9444|9467|9535|9647|9770|9806|10129|11142|23645|23767|26524|27074|27151|28999|51232|55022|55924|57447|57580|57718|58189|58484|64101|80243|80760|8…	A2M|ADARB1|ANGPT1|APBB1|AQP1|ARRB1|ATF3|SERPING1|CAV1|CDKN2B|COL4A3|CPB2|CRYAB|CST5|DCN|HBEGF|DUSP1|DUSP8|EDN1|EDNRB|ENG|FABP4|FBLN1|GAS6|GPC3|GPER1|NCKAP1L|NRG1|IL1B|IL6|ANOS1|SMAD6|GADD45B|PRKCE|PROS1|PTX3|SFTPD|SLPI|SNCA|SPI1|TIMP3|TLR4|TNFAIP3|ZFP36|BTG2|RECK|PLPP3|SOCS2|KAT2B|LIMD1|SOCS3|KLF4|SLIT2|QKI|SH3BP5|GMFG|PPM1F|RASSF2|SPOCK2|FRY|PKIG|PPP1R15A|FLRT3|LATS2|LAMP3|CPAMD8|KLF15|CRIM1|PID…
GO:0019216	0.000136737	0.999941	32	282	regulation of lipid metabolic process	BP	0.00470772	32|33|154|185|341|650|857|1268|1958|2247|2264|2268|2852|3491|3553|3949|5155|5166|5295|5468|5581|6622|7010|8013|9314|9619|10580|23533|114898|338442|345275|388121	ACACB|ACADL|ADRB2|AGTR1|APOC1|BMP2|CAV1|CNR1|EGR1|FGF2|FGFR4|FGR|GPER1|CYR61|IL1B|LDLR|PDGFB|PDK4|PIK3R1|PPARG|PRKCE|SNCA|TEK|NR4A3|KLF4|ABCG1|SORBS1|PIK3R5|C1QTNF2|HCAR2|HSD17B13|TNFAIP8L3
GO:0043547	0.000148822	0.999917	62	655	positive regulation of GTPase activity	BP	0.00511243	2|153|216|284|395|408|858|1839|1901|2247|2263|2264|2674|3071|3084|3563|3568|5155|5739|5923|6347|6358|6368|6369|6711|7010|8787|9365|9411|9459|9732|9754|9912|10044|10395|11069|22898|22899|26084|26166|27147|51196|53358|54959|57514|57580|64407|64411|80243|83478|90627|93663|115727|116984|120892|139818|152273|152831|153020|345930|389337|440073	A2M|ADRB1|ALDH1A1|ANGPT1|ARHGAP6|ARRB1|CAV2|HBEGF|S1PR1|FGF2|FGFR2|FGFR4|GFRA1|NCKAP1L|NRG1|IL3RA|IL5RA|PDGFB|PTGIR|RASGRF1|CCL2|CCL14|CCL23|CCL24|SPTBN1|TEK|RGS9|KL|ARHGAP29|ARHGEF6|DOCK4|STARD8|ARHGAP44|SH2D3C|DLC1|RAPGEF4|DENND3|ARHGEF15|ARHGEF26|RGS22|DENND2A|PLCE1|SHC3|ODAM|ARHGAP31|PREX1|RGS18|ARAP3|PREX2|ARHGAP24|STARD13|ARHGAP18|RASGRP4|ARAP2|LRRK2|DOCK11|FGD5|KLB|RASGEF1B|ECT2L|ARHGEF37|…
GO:1901698	0.000149511	0.99991	78	917	response to nitrogen compound	BP	0.00512473	181|185|186|358|366|477|554|590|728|845|847|857|858|1036|1268|1490|1536|1843|1906|1958|1959|2353|2354|2549|2690|2697|2791|2819|2852|3164|3553|3569|3727|4327|4915|5023|5138|5153|5166|5251|5295|5319|5322|5468|5581|5588|6347|6387|6532|6622|6935|7010|7056|7128|7832|8013|8835|8850|9021|9314|9353|9365|10365|10580|27244|28999|53905|54996|55022|56729|64397|81035|120892|133522|196883|245972|255738|338328	AGRP|AGTR1|AGTR2|AQP1|AQP9|ATP1A2|AVPR2|BCHE|C5AR1|CASQ2|CAT|CAV1|CAV2|CDO1|CNR1|CTGF|CYBB|DUSP1|EDN1|EGR1|EGR2|FOS|FOSB|GAB1|GHR|GJA1|GNG11|GPD1|GPER1|NR4A1|IL1B|IL6|JUND|MMP19|NTRK2|P2RX1|PDE2A|PDE1B|PDK4|PHEX|PIK3R1|PLA2G1B|PLA2G5|PPARG|PRKCE|PRKCQ|CCL2|CXCL12|SLC6A4|SNCA|ZEB1|TEK|THBD|TNFAIP3|BTG2|NR4A3|SOCS2|KAT2B|SOCS3|KLF4|SLIT2|KL|KLF2|SORBS1|SESN1|KLF15|DUOX1|MARC2|PID1|RETN|ZNF106|COLEC…
GO:0007178	0.000150038	0.999932	35	312	transmembrane receptor protein serine/threonine kinase signaling pathway	BP	0.00513144	94|650|659|857|858|1003|1030|1601|1958|2022|2353|2627|2662|2719|3491|4091|4093|5155|6347|6711|6935|7044|7048|7049|7122|8425|8516|23090|25928|55273|83891|84913|91851|168667|255743	ACVRL1|BMP2|BMPR2|CAV1|CAV2|CDH5|CDKN2B|DAB2|EGR1|ENG|FOS|GATA6|GDF10|GPC3|CYR61|SMAD6|SMAD9|PDGFB|CCL2|SPTBN1|ZEB1|LEFTY2|TGFBR2|TGFBR3|CLDN5|LTBP4|ITGA8|ZNF423|SOSTDC1|TMEM100|SNX25|ATOH8|CHRDL1|BMPER|NPNT
GO:0071559	0.000150427	0.99994	27	216	response to transforming growth factor beta	BP	0.00513341	94|857|858|1003|1030|1524|1601|1906|2022|2353|2662|4091|4093|5138|5155|6347|6935|7044|7048|7049|7122|7123|8425|8516|27063|83891|255743	ACVRL1|CAV1|CAV2|CDH5|CDKN2B|CX3CR1|DAB2|EDN1|ENG|FOS|GDF10|SMAD6|SMAD9|PDE2A|PDGFB|CCL2|ZEB1|LEFTY2|TGFBR2|TGFBR3|CLDN5|CLEC3B|LTBP4|ITGA8|ANKRD1|SNX25|NPNT
GO:0007411	0.000151491	0.999938	28	221	axon guidance	BP	0.00515835	627|659|1808|1959|2115|2549|2674|3730|4628|5295|5588|5800|6092|6387|6586|6711|8013|9037|9046|9353|9638|23767|53358|57556|59277|85358|89780|220164	BDNF|BMPR2|DPYSL2|EGR2|ETV1|GAB1|GFRA1|ANOS1|MYH10|PIK3R1|PRKCQ|PTPRO|ROBO2|CXCL12|SLIT3|SPTBN1|NR4A3|SEMA5A|DOK2|SLIT2|FEZ1|FLRT3|SHC3|SEMA6A|NTN4|SHANK3|WNT3A|DOK6
GO:0051128	0.000153184	0.999892	169	2258	regulation of cellular component organization	BP	0.00520456	94|154|185|186|246|284|322|341|395|408|627|659|683|857|858|948|1012|1073|1268|1361|1410|1440|1490|1601|1634|1636|1808|1839|1843|1901|1906|2192|2203|2207|2264|2268|2273|2621|2624|2697|2719|2823|2824|2852|3055|3071|3084|3373|3491|3553|3569|4091|4628|4881|4915|4921|4974|5155|5168|5295|5376|5468|5581|5588|5734|5789|5800|5806|6092|6347|6369|6383|6387|6401|6403|6441|6446|6456|6556|6586|6622|6688|6711|6…	ACVRL1|ADRB2|AGTR1|AGTR2|ALOX15|ANGPT1|APBB1|APOC1|ARHGAP6|ARRB1|BDNF|BMPR2|BST1|CAV1|CAV2|CD36|CDH13|CFL2|CNR1|CPB2|CRYAB|CSF3|CTGF|DAB2|DCN|ACE|DPYSL2|HBEGF|DUSP1|S1PR1|EDN1|FBLN1|FBP1|FCER1G|FGFR4|FGR|FHL1|GAS6|GATA2|GJA1|GPC3|GPM6A|GPM6B|GPER1|HCK|NCKAP1L|NRG1|HYAL1|CYR61|IL1B|IL6|SMAD6|MYH10|NPR1|NTRK2|DDR2|OMG|PDGFB|ENPP2|PIK3R1|PMP22|PPARG|PRKCE|PRKCQ|PTGER4|PTPRD|PTPRO|PTX3|ROBO2|CCL2|CCL…
GO:0046683	0.000154765	0.99995	19	130	response to organophosphorus	BP	0.00524677	358|366|1036|1843|2353|2354|2819|3553|3727|4327|5023|5138|5322|6347|6532|7010|7056|53905|133522	AQP1|AQP9|CDO1|DUSP1|FOS|FOSB|GPD1|IL1B|JUND|MMP19|P2RX1|PDE2A|PLA2G5|CCL2|SLC6A4|TEK|THBD|DUOX1|PPARGC1B
GO:0043087	0.000155938	0.999911	66	710	regulation of GTPase activity	BP	0.00526563	2|153|216|284|395|408|858|1839|1901|2247|2263|2264|2674|3071|3084|3563|3568|4915|5155|5592|5739|5923|6347|6358|6368|6369|6711|7010|8787|9353|9365|9411|9459|9732|9754|9912|10044|10395|11069|22898|22899|26084|26166|27147|51196|53358|54922|54959|57514|57580|64407|64411|80243|83478|90627|93663|115727|116984|120892|139818|152273|152831|153020|345930|389337|440073	A2M|ADRB1|ALDH1A1|ANGPT1|ARHGAP6|ARRB1|CAV2|HBEGF|S1PR1|FGF2|FGFR2|FGFR4|GFRA1|NCKAP1L|NRG1|IL3RA|IL5RA|NTRK2|PDGFB|PRKG1|PTGIR|RASGRF1|CCL2|CCL14|CCL23|CCL24|SPTBN1|TEK|RGS9|SLIT2|KL|ARHGAP29|ARHGEF6|DOCK4|STARD8|ARHGAP44|SH2D3C|DLC1|RAPGEF4|DENND3|ARHGEF15|ARHGEF26|RGS22|DENND2A|PLCE1|SHC3|RASIP1|ODAM|ARHGAP31|PREX1|RGS18|ARAP3|PREX2|ARHGAP24|STARD13|ARHGAP18|RASGRP4|ARAP2|LRRK2|DOCK11|FGD5|KLB…
GO:0010648	0.000156001	0.999901	99	1214	negative regulation of cell communication	BP	0.00526563	154|177|186|408|467|590|650|845|857|858|1601|1634|1839|1843|1850|1906|1958|2192|2203|2621|2624|2719|2852|2890|3084|3553|3569|4091|5155|5196|5468|5588|5739|5800|6387|6425|6456|6532|6586|6622|6943|7048|7049|7078|7099|7128|7466|7957|8622|8787|8835|8994|9021|9173|9314|9353|9770|9912|10395|11197|23493|23645|23767|25928|25959|26153|26166|26524|27123|27244|27253|55022|57447|57580|64101|64321|64399|64407…	ADRB2|AGER|AGTR2|ARRB1|ATF3|BCHE|BMP2|CASQ2|CAV1|CAV2|DAB2|DCN|HBEGF|DUSP1|DUSP8|EDN1|EGR1|FBLN1|FBP1|GAS6|GATA2|GPC3|GPER1|GRIA1|NRG1|IL1B|IL6|SMAD6|PDGFB|PF4|PPARG|PRKCQ|PTGIR|PTPRO|CXCL12|SFRP5|SH3GL2|SLC6A4|SLIT3|SNCA|TCF21|TGFBR2|TGFBR3|TIMP3|TLR4|TNFAIP3|WFS1|EPM2A|PDE8B|RGS9|SOCS2|LIMD1|SOCS3|IL1RL1|KLF4|SLIT2|RASSF2|ARHGAP44|DLC1|WIF1|HEY2|PPP1R15A|FLRT3|SOSTDC1|KANK2|KIF26A|RGS22|LATS2|D…
GO:0097205	0.000157496	0.999983	7	22	renal filtration	BP	0.00530054	947|2013|2621|2697|2702|5155|5800	CD34|EMP2|GAS6|GJA1|GJA5|PDGFB|PTPRO
GO:0045944	0.00015772	0.999902	88	1047	positive regulation of transcription from RNA polymerase II promoter	BP	0.00530054	94|154|322|408|467|650|659|1012|1030|1316|1440|1634|1901|1906|1958|1959|2022|2034|2078|2115|2247|2263|2294|2313|2353|2354|2624|2627|2852|3084|3164|3202|3400|3491|3553|3569|3727|4005|4091|4093|4211|4222|4223|4784|4855|5028|5155|5196|5295|5319|5325|5468|5990|6258|6556|6688|6886|6910|6925|6935|6943|7099|8013|8516|8850|9079|9314|9457|9839|10365|22885|23493|27063|28984|28999|29950|51621|54345|55022|57…	ACVRL1|ADRB2|APBB1|ARRB1|ATF3|BMP2|BMPR2|CDH13|CDKN2B|KLF6|CSF3|DCN|S1PR1|EDN1|EGR1|EGR2|ENG|EPAS1|ERG|ETV1|FGF2|FGFR2|FOXF1|FLI1|FOS|FOSB|GATA2|GATA6|GPER1|NRG1|NR4A1|HOXA5|ID4|CYR61|IL1B|IL6|JUND|LMO2|SMAD6|SMAD9|MEIS1|MEOX1|MEOX2|NFIX|NOTCH4|P2RY1|PDGFB|PF4|PIK3R1|PLA2G1B|PLAGL1|PPARG|RFX2|RXRG|SLC11A1|SPI1|TAL1|TBX5|TCF4|ZEB1|TCF21|TLR4|NR4A3|ITGA8|KAT2B|LDB2|KLF4|FHL5|ZEB2|KLF2|ABLIM3|HEY2|A…
GO:0006809	0.000162934	0.999963	12	63	nitric oxide biosynthetic process	BP	0.00546393	186|857|947|1906|3043|3553|3569|5740|5806|7099|9314|10365	AGTR2|CAV1|CD34|EDN1|HBB|IL1B|IL6|PTGIS|PTX3|TLR4|KLF4|KLF2
GO:0030324	0.000165583	0.999939	23	172	lung development	BP	0.00554077	659|1490|2034|2263|2294|2627|2719|3202|3988|5251|5950|6441|6910|6943|7048|9496|10365|10630|57493|64399|64759|340419|441376	BMPR2|CTGF|EPAS1|FGFR2|FOXF1|GATA6|GPC3|HOXA5|LIPA|PHEX|RBP4|SFTPD|TBX5|TCF21|TGFBR2|TBX4|KLF2|PDPN|HEG1|HHIP|TNS3|RSPO2|AARD
GO:0002685	0.000166286	0.999943	20	158	regulation of leukocyte migration	BP	0.0055523	683|728|1906|2277|2621|2920|2921|3071|3569|5196|5473|5734|6347|6369|6387|6403|9353|23604|83700|90865	BST1|C5AR1|EDN1|VEGFD|GAS6|CXCL2|CXCL3|NCKAP1L|IL6|PF4|PPBP|PTGER4|CCL2|CCL24|CXCL12|SELP|SLIT2|DAPK2|JAM3|IL33
GO:0050794	0.000166781	0.999871	630	10333	regulation of cellular process	BP	0.00555686	2|32|33|94|104|153|154|177|181|185|186|187|246|284|306|322|341|358|395|408|467|477|482|554|590|597|627|650|659|660|667|683|687|695|710|714|728|729|745|845|847|857|858|894|945|947|948|976|1003|1012|1030|1073|1178|1264|1268|1271|1285|1316|1326|1361|1410|1440|1473|1490|1524|1536|1601|1602|1634|1636|1805|1808|1827|1839|1843|1850|1901|1906|1910|1958|1959|1960|2013|2015|2022|2034|2040|2078|2115|2159|21…	A2M|ACACB|ACADL|ACVRL1|ADARB1|ADRB1|ADRB2|AGER|AGRP|AGTR1|AGTR2|APLNR|ALOX15|ANGPT1|ANXA3|APBB1|APOC1|AQP1|ARHGAP6|ARRB1|ATF3|ATP1A2|ATP1B2|AVPR2|BCHE|BCL2A1|BDNF|BMP2|BMPR2|BMX|DST|BST1|KLF9|BTK|SERPING1|C1QC|C5AR1|C6|MYRF|CASQ2|CAT|CAV1|CAV2|CCND2|CD33|CD34|CD36|ADGRE5|CDH5|CDH13|CDKN2B|CFL2|CLC|CNN1|CNR1|CNTFR|COL4A3|KLF6|MAP3K8|CPB2|CRYAB|CSF3|CST5|CTGF|CX3CR1|CYBB|DAB2|DACH1|DCN|ACE|DPT|DPYS…
GO:0048015	0.000168804	0.999933	26	206	phosphatidylinositol-mediated signaling	BP	0.00560811	284|847|1440|1634|1839|1906|2247|2263|2264|2268|2549|2852|3084|4883|4915|5155|5295|6403|7010|8395|9314|9365|23533|80243|152831|653361	ANGPT1|CAT|CSF3|DCN|HBEGF|EDN1|FGF2|FGFR2|FGFR4|FGR|GAB1|GPER1|NRG1|NPR3|NTRK2|PDGFB|PIK3R1|SELP|TEK|PIP5K1B|KLF4|KL|PIK3R5|PREX2|KLB|NCF1
GO:0002526	0.000169043	0.999946	18	132	acute inflammatory response	BP	0.00560811	2|695|710|728|729|730|732|1268|1910|2157|2207|3553|3569|5199|5468|5627|6693|9332	A2M|BTK|SERPING1|C5AR1|C6|C7|C8B|CNR1|EDNRB|F8|FCER1G|IL1B|IL6|CFP|PPARG|PROS1|SPN|CD163
GO:0097756	0.000171213	0.999956	14	80	negative regulation of blood vessel diameter	BP	0.00566796	185|477|554|659|857|1636|1906|1910|2697|2702|5023|6532|8862|9732	AGTR1|ATP1A2|AVPR2|BMPR2|CAV1|ACE|EDN1|EDNRB|GJA1|GJA5|P2RX1|SLC6A4|APLN|DOCK4
GO:0055098	0.000172333	0.999985	6	16	response to low-density lipoprotein particle	BP	0.00569286	948|1012|2207|3949|4023|5468	CD36|CDH13|FCER1G|LDLR|LPL|PPARG
GO:1903036	0.000174991	0.999964	11	55	positive regulation of response to wounding	BP	0.00576839	948|1361|1839|4638|5581|6347|6403|7048|7056|7099|8613	CD36|CPB2|HBEGF|MYLK|PRKCE|CCL2|SELP|TGFBR2|THBD|TLR4|PLPP3
GO:0035239	0.000178186	0.999915	38	346	tube morphogenesis	BP	0.00585386	94|186|650|1906|2022|2247|2263|2294|2627|2719|3142|3202|4855|6425|6909|6926|6935|6943|7048|8013|9353|9839|10395|25928|54345|54922|64321|64399|65009|79192|79633|84913|89780|90627|144165|200894|255743|340419	ACVRL1|AGTR2|BMP2|EDN1|ENG|FGF2|FGFR2|FOXF1|GATA6|GPC3|HLX|HOXA5|NOTCH4|SFRP5|TBX2|TBX3|ZEB1|TCF21|TGFBR2|NR4A3|SLIT2|ZEB2|DLC1|SOSTDC1|SOX18|RASIP1|SOX17|HHIP|NDRG4|IRX1|FAT4|ATOH8|WNT3A|STARD13|PRICKLE1|ARL13B|NPNT|RSPO2
GO:0097485	0.00017834	0.999926	28	223	neuron projection guidance	BP	0.00585386	627|659|1808|1959|2115|2549|2674|3730|4628|5295|5588|5800|6092|6387|6586|6711|8013|9037|9046|9353|9638|23767|53358|57556|59277|85358|89780|220164	BDNF|BMPR2|DPYSL2|EGR2|ETV1|GAB1|GFRA1|ANOS1|MYH10|PIK3R1|PRKCQ|PTPRO|ROBO2|CXCL12|SLIT3|SPTBN1|NR4A3|SEMA5A|DOK2|SLIT2|FEZ1|FLRT3|SHC3|SEMA6A|NTN4|SHANK3|WNT3A|DOK6
GO:0003181	0.00018026	0.99998	7	21	atrioventricular valve morphogenesis	BP	0.00590436	650|659|3491|4091|6910|7048|23493	BMP2|BMPR2|CYR61|SMAD6|TBX5|TGFBR2|HEY2
GO:0046849	0.0001816	0.999956	13	72	bone remodeling	BP	0.0059357	154|1901|3569|3953|5166|5745|7128|9770|51208|53832|81501|84959|133522	ADRB2|S1PR1|IL6|LEPR|PDK4|PTH1R|TNFAIP3|RASSF2|CLDN18|IL20RA|DCSTAMP|UBASH3B|PPARGC1B
GO:0003179	0.000186775	0.999969	9	35	heart valve morphogenesis	BP	0.00609202	650|659|2078|2702|3491|4091|6910|7048|23493	BMP2|BMPR2|ERG|GJA5|CYR61|SMAD6|TBX5|TGFBR2|HEY2
GO:0098758	0.000190347	1	3	3	response to interleukin-8	BP	0.00618248	1958|3577|3579	EGR1|CXCR1|CXCR2
GO:0098759	0.000190347	1	3	3	cellular response to interleukin-8	BP	0.00618248	1958|3577|3579	EGR1|CXCR1|CXCR2
GO:0003148	0.000194147	0.999978	7	22	outflow tract septum morphogenesis	BP	0.00629271	659|2022|2263|2627|4091|6909|7048	BMPR2|ENG|FGFR2|GATA6|SMAD6|TBX2|TGFBR2
GO:0001990	0.000197466	0.999967	9	38	regulation of systemic arterial blood pressure by hormone	BP	0.00638695	185|186|554|1359|1511|1636|1906|2702|4311	AGTR1|AGTR2|AVPR2|CPA3|CTSG|ACE|EDN1|GJA5|MME
GO:0001977	0.000204155	0.999982	6	17	renal system process involved in regulation of blood volume	BP	0.00658951	2013|2621|2697|2702|5155|5800	EMP2|GAS6|GJA1|GJA5|PDGFB|PTPRO
GO:0055023	0.000206297	0.999971	8	29	positive regulation of cardiac muscle tissue growth	BP	0.00664483	1906|2247|2263|2627|6909|6910|7049|23493	EDN1|FGF2|FGFR2|GATA6|TBX2|TBX5|TGFBR3|HEY2
GO:0006968	0.000208066	0.999956	11	60	cellular defense response	BP	0.0066879	728|1524|3579|4332|4688|5551|6693|7305|10871|51473|653361	C5AR1|CX3CR1|CXCR2|MNDA|NCF2|PRF1|SPN|TYROBP|CD300C|DCDC2|NCF1
GO:0097755	0.000209576	0.999956	11	56	positive regulation of blood vessel diameter	BP	0.0067225	153|154|186|659|1910|2697|2702|2852|5592|8862|9732	ADRB1|ADRB2|AGTR2|BMPR2|EDNRB|GJA1|GJA5|GPER1|PRKG1|APLN|DOCK4
GO:0060099	0.000211293	0.999987	5	11	regulation of phagocytosis, engulfment	BP	0.00676355	246|948|2624|3071|5468	ALOX15|CD36|GATA2|NCKAP1L|PPARG
GO:0043535	0.00021219	0.999955	11	54	regulation of blood vessel endothelial cell migration	BP	0.00677827	94|186|284|2247|4223|5155|9314|28984|79812|90627|154810	ACVRL1|AGTR2|ANGPT1|FGF2|MEOX2|PDGFB|KLF4|RGCC|MMRN2|STARD13|AMOTL1
GO:0030449	0.00021878	0.999968	8	31	regulation of complement activation	BP	0.00697441	2|710|728|729|730|732|5199|5627	A2M|SERPING1|C5AR1|C6|C7|C8B|CFP|PROS1
GO:0007162	0.000219988	0.999909	27	226	negative regulation of cell adhesion	BP	0.00699073	94|284|395|650|1012|2192|2615|3142|5295|5592|5800|6387|6441|6693|7356|8322|8654|9037|9314|10395|11326|28984|58494|84959|90102|91663|140706	ACVRL1|ANGPT1|ARHGAP6|BMP2|CDH13|FBLN1|LRRC32|HLX|PIK3R1|PRKG1|PTPRO|CXCL12|SFTPD|SPN|SCGB1A1|FZD4|PDE5A|SEMA5A|KLF4|DLC1|VSIG4|RGCC|JAM2|UBASH3B|PHLDB2|MYADM|CCM2L
GO:0030195	0.000220646	0.999957	10	48	negative regulation of blood coagulation	BP	0.00699073	710|947|1361|1906|2160|5155|5592|5627|7056|84959	SERPING1|CD34|CPB2|EDN1|F11|PDGFB|PRKG1|PROS1|THBD|UBASH3B
GO:1900047	0.000220646	0.999957	10	48	negative regulation of hemostasis	BP	0.00699073	710|947|1361|1906|2160|5155|5592|5627|7056|84959	SERPING1|CD34|CPB2|EDN1|F11|PDGFB|PRKG1|PROS1|THBD|UBASH3B
GO:0001558	0.000222699	0.999892	39	379	regulation of cell growth	BP	0.00704137	94|185|186|322|627|659|1410|1490|1808|1839|1906|2203|2273|2697|3084|3373|3491|4881|5468|5588|6387|6446|6586|8425|8835|8839|9037|9353|10516|11170|26153|51196|51232|51393|56920|58189|64321|81501|89780	ACVRL1|AGTR1|AGTR2|APBB1|BDNF|BMPR2|CRYAB|CTGF|DPYSL2|HBEGF|EDN1|FBP1|FHL1|GJA1|NRG1|HYAL1|CYR61|NPR1|PPARG|PRKCQ|CXCL12|SGK1|SLIT3|LTBP4|SOCS2|WISP2|SEMA5A|SLIT2|FBLN5|FAM107A|KIF26A|PLCE1|CRIM1|TRPV2|SEMA3G|WFDC1|SOX17|DCSTAMP|WNT3A
GO:0051338	0.000224581	0.999863	80	958	regulation of transferase activity	BP	0.00708643	104|154|177|284|408|650|728|857|894|1030|1326|1634|1636|1843|1850|1906|2013|2167|2247|2268|2357|2549|2621|2690|3071|3084|3491|3553|3569|4616|4921|5155|5295|5319|5468|5588|6283|6556|6622|7010|7048|7099|7128|7538|8322|8654|8835|8850|9021|9079|9314|9467|9535|9647|9770|9839|11142|23328|23533|23767|26524|28984|29950|51196|55924|57515|57580|64101|80243|84959|89780|91947|94030|114898|120892|196883|28501…	ADARB1|ADRB2|AGER|ANGPT1|ARRB1|BMP2|C5AR1|CAV1|CCND2|CDKN2B|MAP3K8|DCN|ACE|DUSP1|DUSP8|EDN1|EMP2|FABP4|FGF2|FGR|FPR1|GAB1|GAS6|GHR|NCKAP1L|NRG1|CYR61|IL1B|IL6|GADD45B|DDR2|PDGFB|PIK3R1|PLA2G1B|PPARG|PRKCQ|S100A12|SLC11A1|SNCA|TEK|TGFBR2|TLR4|TNFAIP3|ZFP36|FZD4|PDE5A|SOCS2|KAT2B|SOCS3|LDB2|KLF4|SH3BP5|GMFG|PPM1F|RASSF2|ZEB2|PKIG|SASH1|PIK3R5|FLRT3|LATS2|RGCC|SERTAD1|PLCE1|FAM212B|SERINC1|PREX1|LRR…
GO:0014070	0.00022621	0.999862	78	922	response to organic cyclic compound	BP	0.00712332	21|32|186|306|358|366|477|590|650|687|845|847|857|948|1036|1268|1410|1490|1536|1601|1843|1906|1910|1958|2022|2294|2353|2354|2819|2852|3164|3553|3569|3727|4093|4129|4327|4481|5023|5028|5138|5155|5251|5322|5468|5581|5737|6258|6347|6532|6586|6622|6751|6943|7010|7048|7056|7356|7538|7832|8013|8835|9308|9314|9353|10266|10268|10365|25959|27063|53905|57658|58189|81035|120892|133522|167465|255189	ABCA3|ACACB|AGTR2|ANXA3|AQP1|AQP9|ATP1A2|BCHE|BMP2|KLF9|CASQ2|CAT|CAV1|CD36|CDO1|CNR1|CRYAB|CTGF|CYBB|DAB2|DUSP1|EDN1|EDNRB|EGR1|ENG|FOXF1|FOS|FOSB|GPD1|GPER1|NR4A1|IL1B|IL6|JUND|SMAD9|MAOB|MMP19|MSR1|P2RX1|P2RY1|PDE2A|PDGFB|PHEX|PLA2G5|PPARG|PRKCE|PTGFR|RXRG|CCL2|SLC6A4|SLIT3|SNCA|SSTR1|TCF21|TEK|TGFBR2|THBD|SCGB1A1|ZFP36|BTG2|NR4A3|SOCS2|CD83|KLF4|SLIT2|RAMP2|RAMP3|KLF2|KANK2|ANKRD1|DUOX1|CALCO…
GO:0002694	0.000229169	0.999881	46	489	regulation of leukocyte activation	BP	0.00719083	177|695|857|1178|1268|1326|1960|2207|2268|2294|2615|2621|2624|2852|3071|3133|3142|3553|3569|3575|4332|5295|5588|6347|6441|6622|6693|6935|7048|7099|7128|7356|7704|7940|8013|8654|9173|9308|11326|51744|57864|84106|89780|90865|146722|150372	AGER|BTK|CAV1|CLC|CNR1|MAP3K8|EGR3|FCER1G|FGR|FOXF1|LRRC32|GAS6|GATA2|GPER1|NCKAP1L|HLA-E|HLX|IL1B|IL6|IL7R|MNDA|PIK3R1|PRKCQ|CCL2|SFTPD|SNCA|SPN|ZEB1|TGFBR2|TLR4|TNFAIP3|SCGB1A1|ZBTB16|LST1|NR4A3|PDE5A|IL1RL1|CD83|VSIG4|CD244|SLC46A2|PRAM1|WNT3A|IL33|CD300LF|NFAM1
GO:0006937	0.000229282	0.99992	20	148	regulation of muscle contraction	BP	0.00719083	154|477|845|857|1264|1490|1906|2702|2852|5023|5592|7134|7136|8654|9732|10203|10398|51196|126393|255743	ADRB2|ATP1A2|CASQ2|CAV1|CNN1|CTGF|EDN1|GJA5|GPER1|P2RX1|PRKG1|TNNC1|TNNI2|PDE5A|DOCK4|CALCRL|MYL9|PLCE1|HSPB6|NPNT
GO:0045834	0.000232424	0.999924	18	126	positive regulation of lipid metabolic process	BP	0.00727465	154|185|341|2247|2268|3491|3553|3949|5155|5468|5581|7010|8013|9619|10580|114898|345275|388121	ADRB2|AGTR1|APOC1|FGF2|FGR|CYR61|IL1B|LDLR|PDGFB|PPARG|PRKCE|TEK|NR4A3|ABCG1|SORBS1|C1QTNF2|HSD17B13|TNFAIP8L3
GO:0060389	0.000233323	0.999946	12	63	pathway-restricted SMAD protein phosphorylation	BP	0.00728805	94|650|659|1601|2022|2662|4091|7044|7048|7049|83891|168667	ACVRL1|BMP2|BMPR2|DAB2|ENG|GDF10|SMAD6|LEFTY2|TGFBR2|TGFBR3|SNX25|BMPER
GO:0060045	0.000233846	0.999972	7	22	positive regulation of cardiac muscle cell proliferation	BP	0.00728968	2247|2263|2627|6909|6910|7049|23493	FGF2|FGFR2|GATA6|TBX2|TBX5|TGFBR3|HEY2
GO:0030323	0.000235316	0.999911	23	176	respiratory tube development	BP	0.00732077	659|1490|2034|2263|2294|2627|2719|3202|3988|5251|5950|6441|6910|6943|7048|9496|10365|10630|57493|64399|64759|340419|441376	BMPR2|CTGF|EPAS1|FGFR2|FOXF1|GATA6|GPC3|HOXA5|LIPA|PHEX|RBP4|SFTPD|TBX5|TCF21|TGFBR2|TBX4|KLF2|PDPN|HEG1|HHIP|TNS3|RSPO2|AARD
GO:0002548	0.000236335	0.999953	10	59	monocyte chemotaxis	BP	0.00733775	3569|5155|5800|6283|6347|6358|6368|6369|6387|9353	IL6|PDGFB|PTPRO|S100A12|CCL2|CCL14|CCL23|CCL24|CXCL12|SLIT2
GO:0055095	0.000237682	1	3	3	lipoprotein particle mediated signaling	BP	0.00735011	948|1012|4023	CD36|CDH13|LPL
GO:0055096	0.000237682	1	3	3	low-density lipoprotein particle mediated signaling	BP	0.00735011	948|1012|4023	CD36|CDH13|LPL
GO:0010543	0.000239098	0.999965	8	30	regulation of platelet activation	BP	0.00737917	2207|5155|5588|5592|6403|7056|7099|84959	FCER1G|PDGFB|PRKCQ|PRKG1|SELP|THBD|TLR4|UBASH3B
GO:0060976	0.000241096	0.999954	10	43	coronary vasculature development	BP	0.00741027	2627|2719|2852|3340|4091|4628|6910|7049|23493|144165	GATA6|GPC3|GPER1|NDST1|SMAD6|MYH10|TBX5|TGFBR3|HEY2|PRICKLE1
GO:0006959	0.000241266	0.999896	29	288	humoral immune response	BP	0.00741027	2|683|710|712|713|714|728|729|730|732|820|1511|1675|2219|3133|3569|5199|5319|5320|5627|6347|6556|6590|8547|9308|9450|11326|28984|55600	A2M|BST1|SERPING1|C1QA|C1QB|C1QC|C5AR1|C6|C7|C8B|CAMP|CTSG|CFD|FCN1|HLA-E|IL6|CFP|PLA2G1B|PLA2G2A|PROS1|CCL2|SLC11A1|SLPI|FCN3|CD83|LY86|VSIG4|RGCC|ITLN1
GO:0071674	0.000241864	0.999942	12	78	mononuclear cell migration	BP	0.00741027	728|3569|5155|5800|6283|6347|6358|6368|6369|6387|9353|120425	C5AR1|IL6|PDGFB|PTPRO|S100A12|CCL2|CCL14|CCL23|CCL24|CXCL12|SLIT2|JAML
GO:0060415	0.000242019	0.999939	13	73	muscle tissue morphogenesis	BP	0.00741027	104|650|1901|2022|2263|3084|4638|7049|7134|23493|27063|57493|140706	ADARB1|BMP2|S1PR1|ENG|FGFR2|NRG1|MYLK|TGFBR3|TNNC1|HEY2|ANKRD1|HEG1|CCM2L
GO:0003279	0.000242869	0.999928	16	96	cardiac septum development	BP	0.00742162	659|2022|2263|2627|2702|3340|3491|4091|4628|6909|6910|6926|7048|7049|23493|57493	BMPR2|ENG|FGFR2|GATA6|GJA5|NDST1|CYR61|SMAD6|MYH10|TBX2|TBX5|TBX3|TGFBR2|TGFBR3|HEY2|HEG1
GO:0090257	0.000249025	0.999901	25	205	regulation of muscle system process	BP	0.00759476	154|477|845|857|1264|1490|1906|2702|2852|5023|5592|6442|7134|7136|7402|8013|8654|9314|9732|10203|10398|29995|51196|126393|255743	ADRB2|ATP1A2|CASQ2|CAV1|CNN1|CTGF|EDN1|GJA5|GPER1|P2RX1|PRKG1|SGCA|TNNC1|TNNI2|UTRN|NR4A3|PDE5A|KLF4|DOCK4|CALCRL|MYL9|LMCD1|PLCE1|HSPB6|NPNT
GO:0002573	0.000252622	0.999904	23	185	myeloid leukocyte differentiation	BP	0.00768729	714|1440|2353|2624|2719|5153|5196|5295|5468|6688|6886|7048|7099|7305|9398|9770|11025|51208|81501|84959|130733|133522|146433	C1QC|CSF3|FOS|GATA2|GPC3|PDE1B|PF4|PIK3R1|PPARG|SPI1|TAL1|TGFBR2|TLR4|TYROBP|CD101|RASSF2|LILRB3|CLDN18|DCSTAMP|UBASH3B|TMEM178A|PPARGC1B|IL34
GO:1903708	0.000253075	0.999908	21	163	positive regulation of hemopoiesis	BP	0.00768729	177|695|1440|1960|2353|2621|2624|3071|3142|3202|3569|3575|5196|6886|7048|7704|9308|9398|81501|133522|146433	AGER|BTK|CSF3|EGR3|FOS|GAS6|GATA2|NCKAP1L|HLX|HOXA5|IL6|IL7R|PF4|TAL1|TGFBR2|ZBTB16|CD83|CD101|DCSTAMP|PPARGC1B|IL34
GO:0008016	0.000253547	0.999895	27	229	regulation of heart contraction	BP	0.00768729	153|186|477|482|845|857|1490|1674|1839|1906|2034|2697|2702|3762|3777|4881|5348|6330|6505|6909|8654|8862|9254|10659|23493|27129|53826	ADRB1|AGTR2|ATP1A2|ATP1B2|CASQ2|CAV1|CTGF|DES|HBEGF|EDN1|EPAS1|GJA1|GJA5|KCNJ5|KCNK3|NPR1|FXYD1|SCN4B|SLC1A1|TBX2|PDE5A|APLN|CACNA2D2|CELF2|HEY2|HSPB7|FXYD6
GO:0002690	0.000256459	0.999934	13	86	positive regulation of leukocyte chemotaxis	BP	0.0077604	728|1906|2277|2621|2920|2921|3071|3569|5196|5473|6347|6387|23604	C5AR1|EDN1|VEGFD|GAS6|CXCL2|CXCL3|NCKAP1L|IL6|PF4|PPBP|CCL2|CXCL12|DAPK2
GO:0072376	0.000260369	0.999905	21	165	protein activation cascade	BP	0.00786333	2|710|712|713|714|728|729|730|732|1675|2157|2159|2160|2192|2219|5199|5627|7450|8547|11326|28984	A2M|SERPING1|C1QA|C1QB|C1QC|C5AR1|C6|C7|C8B|CFD|F8|F10|F11|FBLN1|FCN1|CFP|PROS1|VWF|FCN3|VSIG4|RGCC
GO:2000257	0.000267694	0.99996	8	32	regulation of protein activation cascade	BP	0.00806736	2|710|728|729|730|732|5199|5627	A2M|SERPING1|C5AR1|C6|C7|C8B|CFP|PROS1
GO:0034103	0.000268166	0.999936	12	66	regulation of tissue remodeling	BP	0.00806736	177|1901|2078|3569|3953|5166|7128|51208|53832|81501|84959|133522	AGER|S1PR1|ERG|IL6|LEPR|PDK4|TNFAIP3|CLDN18|IL20RA|DCSTAMP|UBASH3B|PPARGC1B
GO:0000302	0.000268945	0.99989	26	228	response to reactive oxygen species	BP	0.00807514	358|695|847|948|1410|1536|1843|1906|2353|2878|3039|3040|3043|3373|3569|4688|7128|7356|8013|9314|10365|10516|27244|120892|133522|653361	AQP1|BTK|CAT|CD36|CRYAB|CYBB|DUSP1|EDN1|FOS|GPX3|HBA1|HBA2|HBB|HYAL1|IL6|NCF2|TNFAIP3|SCGB1A1|NR4A3|KLF4|KLF2|FBLN5|SESN1|LRRK2|PPARGC1B|NCF1
GO:0048286	0.000269501	0.999953	9	37	lung alveolus development	BP	0.00807618	659|2263|2294|2627|3202|6441|6943|10630|64759	BMPR2|FGFR2|FOXF1|GATA6|HOXA5|SFTPD|TCF21|PDPN|TNS3
GO:0009968	0.000272589	0.999827	91	1112	negative regulation of signal transduction	BP	0.00815293	154|177|186|408|467|650|845|857|858|1601|1634|1839|1843|1850|1958|2192|2203|2621|2624|2719|2852|3084|3553|3569|4091|5155|5196|5468|5588|5739|5800|6387|6425|6456|6586|6622|6943|7048|7049|7078|7099|7128|7466|7957|8787|8835|8994|9021|9173|9314|9353|9770|9912|10395|11197|23493|23645|23767|25928|25959|26153|26166|26524|27123|27244|55022|57447|57580|64101|64321|64399|64407|64411|65009|79812|80014|80243…	ADRB2|AGER|AGTR2|ARRB1|ATF3|BMP2|CASQ2|CAV1|CAV2|DAB2|DCN|HBEGF|DUSP1|DUSP8|EGR1|FBLN1|FBP1|GAS6|GATA2|GPC3|GPER1|NRG1|IL1B|IL6|SMAD6|PDGFB|PF4|PPARG|PRKCQ|PTGIR|PTPRO|CXCL12|SFRP5|SH3GL2|SLIT3|SNCA|TCF21|TGFBR2|TGFBR3|TIMP3|TLR4|TNFAIP3|WFS1|EPM2A|RGS9|SOCS2|LIMD1|SOCS3|IL1RL1|KLF4|SLIT2|RASSF2|ARHGAP44|DLC1|WIF1|HEY2|PPP1R15A|FLRT3|SOSTDC1|KANK2|KIF26A|RGS22|LATS2|DKK2|SESN1|PID1|NDRG2|PREX1|LR…
GO:0043269	0.000277993	0.999845	55	597	regulation of ion transport	BP	0.00829855	154|186|477|482|845|857|1268|1318|1536|1906|2040|2273|2697|2702|2824|2852|3553|3762|3772|4129|4638|5023|5028|5155|5243|5319|5348|5581|5593|5923|6323|6330|6332|6347|6387|6532|6622|6769|7402|7466|7881|9002|9022|9254|23237|51393|53405|53826|57158|79026|84230|84959|85358|255738|283518	ADRB2|AGTR2|ATP1A2|ATP1B2|CASQ2|CAV1|CNR1|SLC31A2|CYBB|EDN1|STOM|FHL1|GJA1|GJA5|GPM6B|GPER1|IL1B|KCNJ5|KCNJ15|MAOB|MYLK|P2RX1|P2RY1|PDGFB|ABCB1|PLA2G1B|FXYD1|PRKCE|PRKG2|RASGRF1|SCN1A|SCN4B|SCN7A|CCL2|CXCL12|SLC6A4|SNCA|STAC|UTRN|WFS1|KCNAB1|F2RL3|CLIC3|CACNA2D2|ARC|TRPV2|CLIC5|FXYD6|JPH2|AHNAK|LRRC8C|UBASH3B|SHANK3|PCSK9|KCNRG
GO:0000904	0.000283686	0.999837	61	646	cell morphogenesis involved in differentiation	BP	0.0084522	104|322|627|659|1808|1959|2115|2192|2263|2549|2674|3084|3730|4628|4855|4915|4969|4974|5295|5588|5789|5800|6092|6383|6387|6586|6711|6886|7010|8013|8322|8516|9037|9046|9353|9638|9839|9912|10319|22854|23767|26084|26524|51393|53358|55698|56920|57493|57556|57580|59277|64321|79834|80243|85358|89780|91663|120892|196383|200894|220164	ADARB1|APBB1|BDNF|BMPR2|DPYSL2|EGR2|ETV1|FBLN1|FGFR2|GAB1|GFRA1|NRG1|ANOS1|MYH10|NOTCH4|NTRK2|OGN|OMG|PIK3R1|PRKCQ|PTPRD|PTPRO|ROBO2|SDC2|CXCL12|SLIT3|SPTBN1|TAL1|TEK|NR4A3|FZD4|ITGA8|SEMA5A|DOK2|SLIT2|FEZ1|ZEB2|ARHGAP44|LAMC3|NTNG1|FLRT3|ARHGEF26|LATS2|TRPV2|SHC3|RADIL|SEMA3G|HEG1|SEMA6A|PREX1|NTN4|SOX17|PEAK1|PREX2|SHANK3|WNT3A|MYADM|LRRK2|RILPL2|ARL13B|DOK6
GO:0045429	0.000299972	0.999946	9	40	positive regulation of nitric oxide biosynthetic process	BP	0.00890319	186|1906|3043|3553|3569|5806|7099|9314|10365	AGTR2|EDN1|HBB|IL1B|IL6|PTX3|TLR4|KLF4|KLF2
GO:1904407	0.000299972	0.999946	9	40	positive regulation of nitric oxide metabolic process	BP	0.00890319	186|1906|3043|3553|3569|5806|7099|9314|10365	AGTR2|EDN1|HBB|IL1B|IL6|PTX3|TLR4|KLF4|KLF2
GO:0007597	0.000303408	0.99997	6	19	blood coagulation, intrinsic pathway	BP	0.00898105	2|710|2157|2159|2160|7450	A2M|SERPING1|F8|F10|F11|VWF
GO:0061364	0.000303755	1	3	3	apoptotic process involved in luteolysis	BP	0.00898105	6092|6586|9353	ROBO2|SLIT3|SLIT2
GO:0051384	0.000305445	0.999894	19	145	response to glucocorticoid	BP	0.00901381	21|186|306|358|590|687|1036|1843|1906|2353|2354|3569|4129|6347|6586|7356|7538|9353|133522	ABCA3|AGTR2|ANXA3|AQP1|BCHE|KLF9|CDO1|DUSP1|EDN1|FOS|FOSB|IL6|MAOB|CCL2|SLIT3|SCGB1A1|ZFP36|SLIT2|PPARGC1B
GO:0014068	0.000307171	0.999926	12	65	positive regulation of phosphatidylinositol 3-kinase signaling	BP	0.00904753	284|847|1440|1634|2268|2852|3084|4915|5155|6403|7010|653361	ANGPT1|CAT|CSF3|DCN|FGR|GPER1|NRG1|NTRK2|PDGFB|SELP|TEK|NCF1
GO:0015850	0.000307831	0.999875	25	215	organic hydroxy compound transport	BP	0.00904975	185|186|341|358|366|857|948|1268|2207|2824|3949|4129|4481|5023|5028|5468|5950|6387|6532|6622|9429|9619|114880|123264|255738	AGTR1|AGTR2|APOC1|AQP1|AQP9|CAV1|CD36|CNR1|FCER1G|GPM6B|LDLR|MAOB|MSR1|P2RX1|P2RY1|PPARG|RBP4|CXCL12|SLC6A4|SNCA|ABCG2|ABCG1|OSBPL6|SLC51B|PCSK9
GO:0007179	0.000308908	0.999884	22	168	transforming growth factor beta receptor signaling pathway	BP	0.00906422	94|857|858|1003|1030|1601|2022|2353|2662|4091|4093|5155|6347|6935|7044|7048|7049|7122|8425|8516|83891|255743	ACVRL1|CAV1|CAV2|CDH5|CDKN2B|DAB2|ENG|FOS|GDF10|SMAD6|SMAD9|PDGFB|CCL2|ZEB1|LEFTY2|TGFBR2|TGFBR3|CLDN5|LTBP4|ITGA8|SNX25|NPNT
GO:0003081	0.000312626	0.99996	7	25	regulation of systemic arterial blood pressure by renin-angiotensin	BP	0.00914377	185|186|1359|1511|1636|2702|4311	AGTR1|AGTR2|CPA3|CTSG|ACE|GJA5|MME
GO:0045087	0.000312799	0.999813	69	867	innate immune response	BP	0.00914377	2|104|177|361|660|695|710|712|713|714|729|730|732|820|857|948|1536|1675|1906|1958|2207|2219|2268|2852|3055|3133|3384|4360|4688|5199|5319|5468|5581|5806|6283|6347|6358|6368|6369|6441|6503|6556|6590|6622|7099|7128|7305|8547|8685|9021|9450|10326|11326|23705|25939|26253|51311|51744|58484|81035|146433|146722|200315|342510|353514|653361|653509|729238|100049587	A2M|ADARB1|AGER|AQP4|BMX|BTK|SERPING1|C1QA|C1QB|C1QC|C6|C7|C8B|CAMP|CAV1|CD36|CYBB|CFD|EDN1|EGR1|FCER1G|FCN1|FGR|GPER1|HCK|HLA-E|ICAM2|MRC1|NCF2|CFP|PLA2G1B|PPARG|PRKCE|PTX3|S100A12|CCL2|CCL14|CCL23|CCL24|SFTPD|SLA|SLC11A1|SLPI|SNCA|TLR4|TNFAIP3|TYROBP|FCN3|MARCO|SOCS3|LY86|SIRPB1|VSIG4|CADM1|SAMHD1|CLEC4E|TLR8|CD244|NLRC4|COLEC12|IL34|CD300LF|APOBEC3A|CD300E|LILRA5|NCF1|SFTPA1|SFTPA2|SIGLEC14
GO:0032309	0.000320343	0.999942	9	43	icosanoid secretion	BP	0.00934666	186|1636|1906|3553|5319|5320|5322|50487|255189	AGTR2|ACE|EDN1|IL1B|PLA2G1B|PLA2G2A|PLA2G5|PLA2G3|PLA2G4F
GO:1903530	0.000325214	0.999817	56	626	regulation of secretion by cell	BP	0.00947094	185|186|284|322|408|947|1268|1361|1906|2207|2219|2268|2294|2615|2621|2624|2697|2702|2852|3133|3553|3569|4023|4129|5028|5319|5581|5734|5950|6387|6532|6622|6711|7099|8622|8862|9173|9254|11069|23705|25924|26253|27063|28984|29091|51092|51311|51744|56729|80223|84106|90865|120892|203190|338442|338557	AGTR1|AGTR2|ANGPT1|APBB1|ARRB1|CD34|CNR1|CPB2|EDN1|FCER1G|FCN1|FGR|FOXF1|LRRC32|GAS6|GATA2|GJA1|GJA5|GPER1|HLA-E|IL1B|IL6|LPL|MAOB|P2RY1|PLA2G1B|PRKCE|PTGER4|RBP4|CXCL12|SLC6A4|SNCA|SPTBN1|TLR4|PDE8B|APLN|IL1RL1|CACNA2D2|RAPGEF4|CADM1|MYRIP|CLEC4E|ANKRD1|RGCC|STXBP6|SIDT2|TLR8|CD244|RETN|RAB11FIP1|PRAM1|IL33|LRRK2|LGI3|HCAR2|FFAR4
GO:0032269	0.000328231	0.999795	82	1013	negative regulation of cellular protein metabolic process	BP	0.00952505	2|104|284|358|408|467|710|857|1030|1285|1361|1473|1634|1843|1850|1906|1910|2022|2167|2192|2621|2719|2852|3071|3553|3569|3730|4091|4616|5581|5627|6590|6622|6688|7078|7099|7128|7538|7832|8434|8613|8835|8850|8994|9021|9314|9353|9444|9467|9535|9647|9770|9806|10129|11142|23645|23767|26524|27074|27151|28999|51232|55022|55924|57447|57580|57718|58189|58484|64101|80243|80760|83891|84959|91663|94030|114769…	A2M|ADARB1|ANGPT1|AQP1|ARRB1|ATF3|SERPING1|CAV1|CDKN2B|COL4A3|CPB2|CST5|DCN|DUSP1|DUSP8|EDN1|EDNRB|ENG|FABP4|FBLN1|GAS6|GPC3|GPER1|NCKAP1L|IL1B|IL6|ANOS1|SMAD6|GADD45B|PRKCE|PROS1|SLPI|SNCA|SPI1|TIMP3|TLR4|TNFAIP3|ZFP36|BTG2|RECK|PLPP3|SOCS2|KAT2B|LIMD1|SOCS3|KLF4|SLIT2|QKI|SH3BP5|GMFG|PPM1F|RASSF2|SPOCK2|FRY|PKIG|PPP1R15A|FLRT3|LATS2|LAMP3|CPAMD8|KLF15|CRIM1|PID1|FAM212B|NDRG2|PREX1|PPP4R4|WFDC1…
GO:0070542	0.000328302	0.999914	13	78	response to fatty acid	BP	0.00952505	847|948|1490|1906|3949|5166|5468|5581|5734|5737|6347|7049|55022	CAT|CD36|CTGF|EDN1|LDLR|PDK4|PPARG|PRKCE|PTGER4|PTGFR|CCL2|TGFBR3|PID1
GO:0031649	0.000329418	0.999968	6	17	heat generation	BP	0.00953958	153|154|1268|1910|3553|8862	ADRB1|ADRB2|CNR1|EDNRB|IL1B|APLN
GO:0046209	0.00033583	0.999918	12	68	nitric oxide metabolic process	BP	0.00970712	186|857|947|1906|3043|3553|3569|5740|5806|7099|9314|10365	AGTR2|CAV1|CD34|EDN1|HBB|IL1B|IL6|PTGIS|PTX3|TLR4|KLF4|KLF2
GO:0030038	0.00034115	0.999905	14	82	contractile actin filament bundle assembly	BP	0.00982422	395|408|1490|1901|5295|5734|9647|10174|10395|10580|22899|28984|90102|221692	ARHGAP6|ARRB1|CTGF|S1PR1|PIK3R1|PTGER4|PPM1F|SORBS3|DLC1|SORBS1|ARHGEF15|RGCC|PHLDB2|PHACTR1
GO:0043149	0.00034115	0.999905	14	82	stress fiber assembly	BP	0.00982422	395|408|1490|1901|5295|5734|9647|10174|10395|10580|22899|28984|90102|221692	ARHGAP6|ARRB1|CTGF|S1PR1|PIK3R1|PTGER4|PPM1F|SORBS3|DLC1|SORBS1|ARHGEF15|RGCC|PHLDB2|PHACTR1
GO:0050708	0.000343403	0.999829	39	392	regulation of protein secretion	BP	0.00987076	186|284|322|408|947|1268|2219|2268|2615|2621|2697|2702|2852|3133|3553|3569|4023|5319|5581|5734|5950|6711|7099|8622|9173|9254|11069|23705|25924|26253|27063|28984|51092|51311|51744|80223|90865|338442|338557	AGTR2|ANGPT1|APBB1|ARRB1|CD34|CNR1|FCN1|FGR|LRRC32|GAS6|GJA1|GJA5|GPER1|HLA-E|IL1B|IL6|LPL|PLA2G1B|PRKCE|PTGER4|RBP4|SPTBN1|TLR4|PDE8B|IL1RL1|CACNA2D2|RAPGEF4|CADM1|MYRIP|CLEC4E|ANKRD1|RGCC|SIDT2|TLR8|CD244|RAB11FIP1|IL33|HCAR2|FFAR4
GO:0061572	0.000344464	0.99988	19	133	actin filament bundle organization	BP	0.00988292	395|408|1490|1901|4739|5295|5734|9647|10174|10395|10580|11346|22899|28984|85358|90102|171024|221692|359845	ARHGAP6|ARRB1|CTGF|S1PR1|NEDD9|PIK3R1|PTGER4|PPM1F|SORBS3|DLC1|SORBS1|SYNPO|ARHGEF15|RGCC|SHANK3|PHLDB2|SYNPO2|PHACTR1|RFLNB
GO:0044259	0.00034957	0.999887	17	116	multicellular organismal macromolecule metabolic process	BP	0.0100005	1285|1305|1490|1636|2022|3569|4239|4327|5468|6347|7148|23371|28984|55214|56729|131873|256076	COL4A3|COL13A1|CTGF|ACE|ENG|IL6|MFAP4|MMP19|PPARG|CCL2|TNXB|TNS2|RGCC|P3H2|RETN|COL6A6|COL6A5
GO:0051707	0.00035008	0.999792	67	841	response to other organism	BP	0.0100005	104|306|695|728|820|857|948|1268|1440|1511|1524|1634|1906|1910|2207|2268|2353|2697|2920|2921|3055|3133|3373|3553|3569|3727|4129|4360|5196|5199|5319|5320|5473|5551|5581|5734|5737|5739|5806|6283|6347|6387|6401|6403|6441|6556|6590|6622|6693|7056|7099|7128|7356|7538|8547|9450|23328|25939|26253|27063|51311|55600|57088|58484|90865|128488|200315	ADARB1|ANXA3|BTK|C5AR1|CAMP|CAV1|CD36|CNR1|CSF3|CTSG|CX3CR1|DCN|EDN1|EDNRB|FCER1G|FGR|FOS|GJA1|CXCL2|CXCL3|HCK|HLA-E|HYAL1|IL1B|IL6|JUND|MAOB|MRC1|PF4|CFP|PLA2G1B|PLA2G2A|PPBP|PRF1|PRKCE|PTGER4|PTGFR|PTGIR|PTX3|S100A12|CCL2|CXCL12|SELE|SELP|SFTPD|SLC11A1|SLPI|SNCA|SPN|THBD|TLR4|TNFAIP3|SCGB1A1|ZFP36|FCN3|LY86|SASH1|SAMHD1|CLEC4E|ANKRD1|TLR8|ITLN1|PLSCR4|NLRC4|IL33|WFDC12|APOBEC3A
GO:0010712	0.000350668	0.999944	8	35	regulation of collagen metabolic process	BP	0.0100005	1490|2022|3569|4239|5468|6347|28984|56729	CTGF|ENG|IL6|MFAP4|PPARG|CCL2|RGCC|RETN
GO:0050715	0.000351144	0.999896	15	101	positive regulation of cytokine secretion	BP	0.0100005	186|947|2219|2268|3553|4023|5734|6711|9173|23705|26253|28984|51311|51744|90865	AGTR2|CD34|FCN1|FGR|IL1B|LPL|PTGER4|SPTBN1|IL1RL1|CADM1|CLEC4E|RGCC|TLR8|CD244|IL33
GO:0007187	0.000354199	0.999865	22	179	G-protein coupled receptor signaling pathway, coupled to cyclic nucleotide second messenger	BP	0.010069	153|154|186|554|1268|1901|2357|2852|2869|4883|5028|5734|5739|5745|6347|6751|7433|8698|10203|59350|196883|283383	ADRB1|ADRB2|AGTR2|AVPR2|CNR1|S1PR1|FPR1|GPER1|GRK5|NPR3|P2RY1|PTGER4|PTGIR|PTH1R|CCL2|SSTR1|VIPR1|S1PR4|CALCRL|RXFP1|ADCY4|ADGRD1
GO:0050819	0.000358871	0.999926	10	51	negative regulation of coagulation	BP	0.0101831	710|947|1361|1906|2160|5155|5592|5627|7056|84959	SERPING1|CD34|CPB2|EDN1|F11|PDGFB|PRKG1|PROS1|THBD|UBASH3B
GO:0010941	0.000361204	0.999757	114	1503	regulation of cell death	BP	0.0102306	186|284|322|358|408|467|597|627|650|695|728|847|857|894|947|1268|1271|1285|1410|1440|1490|1601|1843|1906|1910|1958|1960|2207|2247|2263|2621|2627|2662|2852|2869|3039|3040|3043|3055|3071|3202|3491|3553|3569|3727|4091|4332|4616|4915|5023|5166|5196|5295|5414|5468|5588|5737|5740|6347|6387|6446|6622|6910|6926|7010|7044|7078|7128|7466|7538|7704|7832|8013|8742|8835|9021|9037|9314|9353|9459|9647|9770|1026…	AGTR2|ANGPT1|APBB1|AQP1|ARRB1|ATF3|BCL2A1|BDNF|BMP2|BTK|C5AR1|CAT|CAV1|CCND2|CD34|CNR1|CNTFR|COL4A3|CRYAB|CSF3|CTGF|DAB2|DUSP1|EDN1|EDNRB|EGR1|EGR3|FCER1G|FGF2|FGFR2|GAS6|GATA6|GDF10|GPER1|GRK5|HBA1|HBA2|HBB|HCK|NCKAP1L|HOXA5|CYR61|IL1B|IL6|JUND|SMAD6|MNDA|GADD45B|NTRK2|P2RX1|PDK4|PF4|PIK3R1|SEPT4|PPARG|PRKCQ|PTGFR|PTGIS|CCL2|CXCL12|SGK1|SNCA|TBX5|TBX3|TEK|LEFTY2|TIMP3|TNFAIP3|WFS1|ZFP36|ZBTB16|B…
GO:0043207	0.000364978	0.999782	67	842	response to external biotic stimulus	BP	0.0103186	104|306|695|728|820|857|948|1268|1440|1511|1524|1634|1906|1910|2207|2268|2353|2697|2920|2921|3055|3133|3373|3553|3569|3727|4129|4360|5196|5199|5319|5320|5473|5551|5581|5734|5737|5739|5806|6283|6347|6387|6401|6403|6441|6556|6590|6622|6693|7056|7099|7128|7356|7538|8547|9450|23328|25939|26253|27063|51311|55600|57088|58484|90865|128488|200315	ADARB1|ANXA3|BTK|C5AR1|CAMP|CAV1|CD36|CNR1|CSF3|CTSG|CX3CR1|DCN|EDN1|EDNRB|FCER1G|FGR|FOS|GJA1|CXCL2|CXCL3|HCK|HLA-E|HYAL1|IL1B|IL6|JUND|MAOB|MRC1|PF4|CFP|PLA2G1B|PLA2G2A|PPBP|PRF1|PRKCE|PTGER4|PTGFR|PTGIR|PTX3|S100A12|CCL2|CXCL12|SELE|SELP|SFTPD|SLC11A1|SLPI|SNCA|SPN|THBD|TLR4|TNFAIP3|SCGB1A1|ZFP36|FCN3|LY86|SASH1|SAMHD1|CLEC4E|ANKRD1|TLR8|ITLN1|PLSCR4|NLRC4|IL33|WFDC12|APOBEC3A
GO:0010951	0.000366409	0.999849	25	233	negative regulation of endopeptidase activity	BP	0.0103402	2|358|408|710|1285|1473|2621|3569|3730|5627|6590|6622|7078|8434|9314|9806|27074|27151|51232|58189|58484|80760|114769|128488|653145	A2M|AQP1|ARRB1|SERPING1|COL4A3|CST5|GAS6|IL6|ANOS1|PROS1|SLPI|SNCA|TIMP3|RECK|KLF4|SPOCK2|LAMP3|CPAMD8|CRIM1|WFDC1|NLRC4|ITIH5|CARD16|WFDC12|ANXA8
GO:1905153	0.000369307	0.999974	5	12	regulation of membrane invagination	BP	0.010403	246|948|2624|3071|5468	ALOX15|CD36|GATA2|NCKAP1L|PPARG
GO:0032409	0.000374801	0.999846	25	211	regulation of transporter activity	BP	0.0105386	477|482|845|857|2040|2273|2697|5243|5348|5468|5581|5923|6330|6446|6622|6769|7402|7881|23237|53826|57158|79026|85358|255738|283518	ATP1A2|ATP1B2|CASQ2|CAV1|STOM|FHL1|GJA1|ABCB1|FXYD1|PPARG|PRKCE|RASGRF1|SCN4B|SGK1|SNCA|STAC|UTRN|KCNAB1|ARC|FXYD6|JPH2|AHNAK|SHANK3|PCSK9|KCNRG
GO:0090092	0.00038012	0.999844	25	207	regulation of transmembrane receptor protein serine/threonine kinase signaling pathway	BP	0.0106689	94|650|659|857|858|1030|1601|2022|2627|2662|2719|3491|4091|6935|7044|7048|7049|8425|8516|23090|25928|83891|91851|168667|255743	ACVRL1|BMP2|BMPR2|CAV1|CAV2|CDKN2B|DAB2|ENG|GATA6|GDF10|GPC3|CYR61|SMAD6|ZEB1|LEFTY2|TGFBR2|TGFBR3|LTBP4|ITGA8|ZNF423|SOSTDC1|SNX25|CHRDL1|BMPER|NPNT
GO:0051890	0.000386393	0.999986	4	7	regulation of cardioblast differentiation	BP	0.0108253	2627|6910|89780|144165	GATA6|TBX5|WNT3A|PRICKLE1
GO:0015908	0.000389614	0.999889	14	90	fatty acid transport	BP	0.0108958	32|186|948|1636|1906|3553|5319|5320|5322|5468|6578|50487|84879|255189	ACACB|AGTR2|CD36|ACE|EDN1|IL1B|PLA2G1B|PLA2G2A|PLA2G5|PPARG|SLCO2A1|PLA2G3|MFSD2A|PLA2G4F
GO:0003209	0.000395535	0.999937	8	31	cardiac atrium morphogenesis	BP	0.0110415	659|2022|2702|3491|6910|23493|57493|140706	BMPR2|ENG|GJA5|CYR61|TBX5|HEY2|HEG1|CCM2L
GO:0060732	0.000403378	0.99997	5	13	positive regulation of inositol phosphate biosynthetic process	BP	0.0112402	2852|5028|5745|6622|51744	GPER1|P2RY1|PTH1R|SNCA|CD244
GO:0050728	0.000412221	0.999875	15	104	negative regulation of inflammatory response	BP	0.011466	177|1524|2294|2852|5468|5734|5740|6693|7010|7128|9021|9314|10203|58189|338557	AGER|CX3CR1|FOXF1|GPER1|PPARG|PTGER4|PTGIS|SPN|TEK|TNFAIP3|SOCS3|KLF4|CALCRL|WFDC1|FFAR4
GO:0032231	0.000415469	0.999882	14	84	regulation of actin filament bundle assembly	BP	0.0115356	395|1490|1901|5295|5734|9647|10174|10395|11346|22899|28984|85358|90102|171024	ARHGAP6|CTGF|S1PR1|PIK3R1|PTGER4|PPM1F|SORBS3|DLC1|SYNPO|ARHGEF15|RGCC|SHANK3|PHLDB2|SYNPO2
GO:0007620	0.000419881	0.999955	6	20	copulation	BP	0.0116372	1268|1910|5023|5028|6532|8528	CNR1|EDNRB|P2RX1|P2RY1|SLC6A4|DDO
GO:0001991	0.000432537	0.999954	6	19	regulation of systemic arterial blood pressure by circulatory renin-angiotensin	BP	0.0119666	186|1359|1511|1636|2702|4311	AGTR2|CPA3|CTSG|ACE|GJA5|MME
GO:0003341	0.00043477	0.999898	11	61	cilium movement	BP	0.0120069	27019|27285|55130|64446|83659|83853|139212|220136|221421|345895|387885	DNAI1|TEKT2|ARMC4|DNAI2|TEKT1|ROPN1L|PIH1D3|CFAP53|RSPH9|RSPH4A|CFAP73
GO:0008219	0.000436828	0.999691	147	2037	cell death	BP	0.0120374	104|186|284|322|358|408|467|597|627|650|659|660|695|728|847|857|894|947|1178|1268|1271|1285|1410|1440|1490|1601|1776|1843|1906|1910|1958|1960|2012|2013|2207|2247|2263|2621|2627|2662|2697|2852|2869|3039|3040|3043|3055|3071|3202|3491|3553|3569|3727|3851|4091|4223|4332|4616|4915|5023|5153|5166|5196|5295|5325|5376|5414|5468|5551|5581|5588|5737|5740|6092|6347|6387|6425|6446|6586|6622|6688|6693|6910|69…	ADARB1|AGTR2|ANGPT1|APBB1|AQP1|ARRB1|ATF3|BCL2A1|BDNF|BMP2|BMPR2|BMX|BTK|C5AR1|CAT|CAV1|CCND2|CD34|CLC|CNR1|CNTFR|COL4A3|CRYAB|CSF3|CTGF|DAB2|DNASE1L3|DUSP1|EDN1|EDNRB|EGR1|EGR3|EMP1|EMP2|FCER1G|FGF2|FGFR2|GAS6|GATA6|GDF10|GJA1|GPER1|GRK5|HBA1|HBA2|HBB|HCK|NCKAP1L|HOXA5|CYR61|IL1B|IL6|JUND|KRT4|SMAD6|MEOX2|MNDA|GADD45B|NTRK2|P2RX1|PDE1B|PDK4|PF4|PIK3R1|PLAGL1|PMP22|SEPT4|PPARG|PRF1|PRKCE|PRKCQ|PT…
GO:0072378	0.000437426	0.99994	7	27	blood coagulation, fibrin clot formation	BP	0.0120374	2|710|2157|2159|2160|2192|7450	A2M|SERPING1|F8|F10|F11|FBLN1|VWF
GO:0048251	0.000449411	0.999982	4	7	elastic fiber assembly	BP	0.0123453	4239|4629|7148|10516	MFAP4|MYH11|TNXB|FBLN5
GO:0048644	0.000450319	0.999878	13	78	muscle organ morphogenesis	BP	0.0123483	104|650|1901|2022|2263|3084|4638|7049|7134|23493|27063|57493|140706	ADARB1|BMP2|S1PR1|ENG|FGFR2|NRG1|MYLK|TGFBR3|TNNC1|HEY2|ANKRD1|HEG1|CCM2L
GO:0044246	0.000454168	0.999924	8	36	regulation of multicellular organismal metabolic process	BP	0.0124319	1490|2022|3569|4239|5468|6347|28984|56729	CTGF|ENG|IL6|MFAP4|PPARG|CCL2|RGCC|RETN
GO:0010742	0.000463119	0.999923	8	34	macrophage derived foam cell differentiation	BP	0.0126322	185|948|4023|4481|5196|5320|5468|9619	AGTR1|CD36|LPL|MSR1|PF4|PLA2G2A|PPARG|ABCG1
GO:0090077	0.000463119	0.999923	8	34	foam cell differentiation	BP	0.0126322	185|948|4023|4481|5196|5320|5468|9619	AGTR1|CD36|LPL|MSR1|PF4|PLA2G2A|PPARG|ABCG1
GO:0018108	0.000464894	0.999769	37	367	peptidyl-tyrosine phosphorylation	BP	0.0126584	284|660|683|695|857|948|1440|1636|1839|2202|2247|2263|2264|2268|2621|2690|3055|3084|3563|3568|3569|4915|4919|4921|5155|5168|5581|6503|7010|7075|8613|9021|9467|79834|89780|285016|653361	ANGPT1|BMX|BST1|BTK|CAV1|CD36|CSF3|ACE|HBEGF|EFEMP1|FGF2|FGFR2|FGFR4|FGR|GAS6|GHR|HCK|NRG1|IL3RA|IL5RA|IL6|NTRK2|ROR1|DDR2|PDGFB|ENPP2|PRKCE|SLA|TEK|TIE1|PLPP3|SOCS3|SH3BP5|PEAK1|WNT3A|ALKAL2|NCF1
GO:0003170	0.000472051	0.999911	9	39	heart valve development	BP	0.0128307	650|659|2078|2702|3491|4091|6910|7048|23493	BMP2|BMPR2|ERG|GJA5|CYR61|SMAD6|TBX5|TGFBR2|HEY2
GO:0048598	0.000473339	0.999734	53	570	embryonic morphogenesis	BP	0.0128431	187|659|1843|1906|2022|2202|2247|2263|2294|2624|2627|2702|2719|3142|3202|3340|3373|3491|3899|5950|6886|6909|6910|6926|6935|6943|7048|7704|8013|8434|8516|8613|9021|9314|9496|9839|10395|23767|26524|54345|55084|64321|65009|79192|80144|83595|84913|89780|90102|91663|144165|200894|340419	APLNR|BMPR2|DUSP1|EDN1|ENG|EFEMP1|FGF2|FGFR2|FOXF1|GATA2|GATA6|GJA5|GPC3|HLX|HOXA5|NDST1|HYAL1|CYR61|AFF3|RBP4|TAL1|TBX2|TBX5|TBX3|ZEB1|TCF21|TGFBR2|ZBTB16|NR4A3|RECK|ITGA8|PLPP3|SOCS3|KLF4|TBX4|ZEB2|DLC1|FLRT3|LATS2|SOX18|SOBP|SOX17|NDRG4|IRX1|FRAS1|SOX7|ATOH8|WNT3A|PHLDB2|MYADM|PRICKLE1|ARL13B|RSPO2
GO:0030282	0.000479426	0.999853	15	99	bone mineralization	BP	0.0129856	154|246|650|659|1901|2263|2719|2824|4921|5251|5745|7123|9365|340419|359845	ADRB2|ALOX15|BMP2|BMPR2|S1PR1|FGFR2|GPC3|GPM6B|DDR2|PHEX|PTH1R|CLEC3B|KL|RSPO2|RFLNB
GO:0051150	0.000488835	0.999932	7	26	regulation of smooth muscle cell differentiation	BP	0.0132173	2022|2263|2294|2852|5155|6935|23493	ENG|FGFR2|FOXF1|GPER1|PDGFB|ZEB1|HEY2
GO:2000352	0.000496991	0.99993	7	26	negative regulation of endothelial cell apoptotic process	BP	0.0134144	284|2621|7010|7128|9037|10266|79625	ANGPT1|GAS6|TEK|TNFAIP3|SEMA5A|RAMP2|NDNF
GO:0060541	0.000498085	0.999796	24	197	respiratory system development	BP	0.0134206	659|1490|2034|2263|2294|2627|2719|3202|3988|5251|5950|6441|6910|6943|7048|7881|9496|10365|10630|57493|64399|64759|340419|441376	BMPR2|CTGF|EPAS1|FGFR2|FOXF1|GATA6|GPC3|HOXA5|LIPA|PHEX|RBP4|SFTPD|TBX5|TCF21|TGFBR2|KCNAB1|TBX4|KLF2|PDPN|HEG1|HHIP|TNS3|RSPO2|AARD
GO:0051048	0.000499975	0.999799	23	195	negative regulation of secretion	BP	0.0134481	186|284|554|947|1268|1906|2294|2615|2621|3084|3553|3569|4129|5028|5734|6622|8622|28984|29091|51311|80223|90865|338557	AGTR2|ANGPT1|AVPR2|CD34|CNR1|EDN1|FOXF1|LRRC32|GAS6|NRG1|IL1B|IL6|MAOB|P2RY1|PTGER4|SNCA|PDE8B|RGCC|STXBP6|TLR8|RAB11FIP1|IL33|FFAR4
GO:0002697	0.000503724	0.99976	33	328	regulation of immune effector process	BP	0.0135255	2|177|284|695|710|728|729|730|732|948|1178|2207|2268|2294|2624|3055|3133|3142|3553|3569|3575|5199|5627|5950|6347|6693|7099|7128|8013|23705|51744|84106|90865	A2M|AGER|ANGPT1|BTK|SERPING1|C5AR1|C6|C7|C8B|CD36|CLC|FCER1G|FGR|FOXF1|GATA2|HCK|HLA-E|HLX|IL1B|IL6|IL7R|CFP|PROS1|RBP4|CCL2|SPN|TLR4|TNFAIP3|NR4A3|CADM1|CD244|PRAM1|IL33
GO:0071404	0.000507471	0.99996	5	13	cellular response to low-density lipoprotein particle stimulus	BP	0.0136025	948|1012|2207|3949|4023	CD36|CDH13|FCER1G|LDLR|LPL
GO:0018212	0.000510639	0.999745	37	369	peptidyl-tyrosine modification	BP	0.0136638	284|660|683|695|857|948|1440|1636|1839|2202|2247|2263|2264|2268|2621|2690|3055|3084|3563|3568|3569|4915|4919|4921|5155|5168|5581|6503|7010|7075|8613|9021|9467|79834|89780|285016|653361	ANGPT1|BMX|BST1|BTK|CAV1|CD36|CSF3|ACE|HBEGF|EFEMP1|FGF2|FGFR2|FGFR4|FGR|GAS6|GHR|HCK|NRG1|IL3RA|IL5RA|IL6|NTRK2|ROR1|DDR2|PDGFB|ENPP2|PRKCE|SLA|TEK|TIE1|PLPP3|SOCS3|SH3BP5|PEAK1|WNT3A|ALKAL2|NCF1
GO:1901654	0.000513374	0.999798	22	181	response to ketone	BP	0.0137038	186|358|687|857|1536|1843|1906|2353|2354|2621|3569|4129|5468|5581|5734|6347|6586|7049|9314|9353|10266|10365	AGTR2|AQP1|KLF9|CAV1|CYBB|DUSP1|EDN1|FOS|FOSB|GAS6|IL6|MAOB|PPARG|PRKCE|PTGER4|CCL2|SLIT3|TGFBR3|KLF4|SLIT2|RAMP2|KLF2
GO:0052548	0.000514528	0.999748	35	370	regulation of endopeptidase activity	BP	0.0137038	2|358|408|710|1285|1473|1490|2621|2852|3491|3569|3730|5023|5468|5627|6590|6622|7078|8434|9314|9647|9806|10395|27074|27151|51232|58189|58484|80760|83595|89780|114769|128488|341676|653145	A2M|AQP1|ARRB1|SERPING1|COL4A3|CST5|CTGF|GAS6|GPER1|CYR61|IL6|ANOS1|P2RX1|PPARG|PROS1|SLPI|SNCA|TIMP3|RECK|KLF4|PPM1F|SPOCK2|DLC1|LAMP3|CPAMD8|CRIM1|WFDC1|NLRC4|ITIH5|SOX7|WNT3A|CARD16|WFDC12|NEK5|ANXA8
GO:0001763	0.000514786	0.999788	24	193	morphogenesis of a branching structure	BP	0.0137038	186|650|1305|1906|2022|2247|2263|2294|2719|3202|3569|4855|6926|6943|7048|9021|9353|54922|59277|64399|79633|120892|255743|340419	AGTR2|BMP2|COL13A1|EDN1|ENG|FGF2|FGFR2|FOXF1|GPC3|HOXA5|IL6|NOTCH4|TBX3|TCF21|TGFBR2|SOCS3|SLIT2|RASIP1|NTN4|HHIP|FAT4|LRRK2|NPNT|RSPO2
GO:0009607	0.000528625	0.999678	69	881	response to biotic stimulus	BP	0.014048	104|306|695|728|820|857|948|1268|1440|1511|1524|1634|1906|1910|2207|2268|2353|2697|2920|2921|3055|3133|3373|3553|3569|3727|4129|4360|5196|5199|5319|5320|5473|5551|5581|5734|5737|5739|5806|6283|6347|6387|6401|6403|6441|6556|6590|6622|6693|7056|7099|7128|7356|7466|7538|8547|9450|23328|25939|26253|27063|51311|55600|57088|58484|90865|128488|200315|646658	ADARB1|ANXA3|BTK|C5AR1|CAMP|CAV1|CD36|CNR1|CSF3|CTSG|CX3CR1|DCN|EDN1|EDNRB|FCER1G|FGR|FOS|GJA1|CXCL2|CXCL3|HCK|HLA-E|HYAL1|IL1B|IL6|JUND|MAOB|MRC1|PF4|CFP|PLA2G1B|PLA2G2A|PPBP|PRF1|PRKCE|PTGER4|PTGFR|PTGIR|PTX3|S100A12|CCL2|CXCL12|SELE|SELP|SFTPD|SLC11A1|SLPI|SNCA|SPN|THBD|TLR4|TNFAIP3|SCGB1A1|WFS1|ZFP36|FCN3|LY86|SASH1|SAMHD1|CLEC4E|ANKRD1|TLR8|ITLN1|PLSCR4|NLRC4|IL33|WFDC12|APOBEC3A|SYNDIG1L
GO:0035886	0.000538891	0.99994	6	19	vascular smooth muscle cell differentiation	BP	0.0142963	2022|2627|2852|5155|10266|23493	ENG|GATA6|GPER1|PDGFB|RAMP2|HEY2
GO:1903531	0.000545642	0.99979	21	171	negative regulation of secretion by cell	BP	0.0144507	186|284|947|1268|1906|2294|2615|2621|3553|3569|4129|5028|5734|6622|8622|28984|29091|51311|80223|90865|338557	AGTR2|ANGPT1|CD34|CNR1|EDN1|FOXF1|LRRC32|GAS6|IL1B|IL6|MAOB|P2RY1|PTGER4|SNCA|PDE8B|RGCC|STXBP6|TLR8|RAB11FIP1|IL33|FFAR4
GO:0060986	0.000551915	0.999891	9	44	endocrine hormone secretion	BP	0.0145919	185|186|3553|6926|8322|8862|56729|80223|338442	AGTR1|AGTR2|IL1B|TBX3|FZD4|APLN|RETN|RAB11FIP1|HCAR2
GO:0006915	0.000563485	0.999606	132	1804	apoptotic process	BP	0.0148724	104|186|284|322|358|408|467|597|627|650|659|660|695|728|847|857|894|1178|1268|1271|1285|1410|1490|1601|1776|1843|1906|1910|1958|1960|2207|2263|2621|2627|2662|2697|2852|2869|3055|3071|3202|3491|3553|3569|4091|4332|4616|4915|5023|5153|5166|5196|5295|5325|5414|5468|5551|5581|5588|5737|5740|6092|6347|6387|6425|6446|6586|6622|6688|6693|6910|6926|7010|7044|7048|7078|7099|7128|7466|7538|7704|7832|8013|8…	ADARB1|AGTR2|ANGPT1|APBB1|AQP1|ARRB1|ATF3|BCL2A1|BDNF|BMP2|BMPR2|BMX|BTK|C5AR1|CAT|CAV1|CCND2|CLC|CNR1|CNTFR|COL4A3|CRYAB|CTGF|DAB2|DNASE1L3|DUSP1|EDN1|EDNRB|EGR1|EGR3|FCER1G|FGFR2|GAS6|GATA6|GDF10|GJA1|GPER1|GRK5|HCK|NCKAP1L|HOXA5|CYR61|IL1B|IL6|SMAD6|MNDA|GADD45B|NTRK2|P2RX1|PDE1B|PDK4|PF4|PIK3R1|PLAGL1|SEPT4|PPARG|PRF1|PRKCE|PRKCQ|PTGFR|PTGIS|ROBO2|CCL2|CXCL12|SFRP5|SGK1|SLIT3|SNCA|SPI1|SPN|TB…
GO:0045444	0.000567293	0.999765	24	204	fat cell differentiation	BP	0.014927	153|154|650|1959|2167|2624|2662|2852|2869|3164|3400|3569|4091|5468|7538|7704|8013|9314|11197|56729|84230|89780|122953|338557	ADRB1|ADRB2|BMP2|EGR2|FABP4|GATA2|GDF10|GPER1|GRK5|NR4A1|ID4|IL6|SMAD6|PPARG|ZFP36|ZBTB16|NR4A3|KLF4|WIF1|RETN|LRRC8C|WNT3A|JDP2|FFAR4
GO:0006469	0.000567483	0.999751	27	240	negative regulation of protein kinase activity	BP	0.014927	104|857|1030|1634|1843|1850|2167|3553|3569|4616|7128|8835|8850|9021|9467|9535|9647|11142|23767|26524|55924|57580|64101|80243|84959|94030|389119	ADARB1|CAV1|CDKN2B|DCN|DUSP1|DUSP8|FABP4|IL1B|IL6|GADD45B|TNFAIP3|SOCS2|KAT2B|SOCS3|SH3BP5|GMFG|PPM1F|PKIG|FLRT3|LATS2|FAM212B|PREX1|LRRC4|PREX2|UBASH3B|LRRC4B|FAM212A
GO:0043491	0.000572727	0.999791	19	149	protein kinase B signaling	BP	0.0150394	284|1440|1839|2159|2621|2852|3084|3553|3569|4915|6237|6347|6425|7010|9037|9314|23533|55273|388121	ANGPT1|CSF3|HBEGF|F10|GAS6|GPER1|NRG1|IL1B|IL6|NTRK2|RRAS|CCL2|SFRP5|TEK|SEMA5A|KLF4|PIK3R5|TMEM100|TNFAIP8L3
GO:2001187	0.000575347	0.999992	3	4	positive regulation of CD8-positive, alpha-beta T cell activation	BP	0.015058	3071|3133|51744	NCKAP1L|HLA-E|CD244
GO:0031400	0.000575378	0.999673	53	591	negative regulation of protein modification process	BP	0.015058	104|284|408|467|857|1030|1634|1843|1850|2022|2167|2192|2852|3071|3553|3569|4091|4616|5581|6622|6688|7078|7099|7128|8613|8835|8850|9021|9314|9353|9467|9535|9647|9770|10129|11142|23645|23767|26524|28999|55022|55924|57447|57580|57718|64101|80243|83891|84959|91663|94030|120892|389119	ADARB1|ANGPT1|ARRB1|ATF3|CAV1|CDKN2B|DCN|DUSP1|DUSP8|ENG|FABP4|FBLN1|GPER1|NCKAP1L|IL1B|IL6|SMAD6|GADD45B|PRKCE|SNCA|SPI1|TIMP3|TLR4|TNFAIP3|PLPP3|SOCS2|KAT2B|SOCS3|KLF4|SLIT2|SH3BP5|GMFG|PPM1F|RASSF2|FRY|PKIG|PPP1R15A|FLRT3|LATS2|KLF15|PID1|FAM212B|NDRG2|PREX1|PPP4R4|LRRC4|PREX2|SNX25|UBASH3B|MYADM|LRRC4B|LRRK2|FAM212A
GO:0002687	0.0005884	0.999815	15	115	positive regulation of leukocyte migration	BP	0.0153728	728|1906|2277|2621|2920|2921|3071|3569|5196|5473|6347|6369|6387|6403|23604	C5AR1|EDN1|VEGFD|GAS6|CXCL2|CXCL3|NCKAP1L|IL6|PF4|PPBP|CCL2|CCL24|CXCL12|SELP|DAPK2
GO:0090100	0.000590093	0.999816	15	99	positive regulation of transmembrane receptor protein serine/threonine kinase signaling pathway	BP	0.0153911	94|650|659|1030|1601|2022|2627|2662|2719|3491|7044|7049|8516|23090|255743	ACVRL1|BMP2|BMPR2|CDKN2B|DAB2|ENG|GATA6|GDF10|GPC3|CYR61|LEFTY2|TGFBR3|ITGA8|ZNF423|NPNT
GO:0072006	0.000607282	0.999778	19	139	nephron development	BP	0.0157825	186|284|650|947|1285|1958|2247|2719|2828|5155|5175|5800|6943|7010|28999|51196|79192|79633|255743	AGTR2|ANGPT1|BMP2|CD34|COL4A3|EGR1|FGF2|GPC3|GPR4|PDGFB|PECAM1|PTPRO|TCF21|TEK|KLF15|PLCE1|IRX1|FAT4|NPNT
GO:0060355	0.000608039	0.999991	3	4	positive regulation of cell adhesion molecule production	BP	0.0157825	857|3553|81035	CAV1|IL1B|COLEC12
GO:0030030	0.000608154	0.99959	107	1336	cell projection organization	BP	0.0157825	104|177|322|627|659|857|1012|1268|1770|1808|1901|1959|2012|2013|2115|2263|2549|2674|2697|2823|3084|3569|3730|4628|4638|4915|4969|4974|5168|5295|5376|5588|5592|5789|5800|5923|5990|6092|6383|6387|6446|6456|6586|6711|7832|7940|8013|8516|9037|9046|9314|9353|9459|9576|9638|9839|9912|10129|10763|10810|22854|22885|23767|26084|27019|27063|27285|50487|51364|51393|51473|53358|55118|55130|56920|57556|57576|…	ADARB1|AGER|APBB1|BDNF|BMPR2|CAV1|CDH13|CNR1|DNAH9|DPYSL2|S1PR1|EGR2|EMP1|EMP2|ETV1|FGFR2|GAB1|GFRA1|GJA1|GPM6A|NRG1|IL6|ANOS1|MYH10|MYLK|NTRK2|OGN|OMG|ENPP2|PIK3R1|PMP22|PRKCQ|PRKG1|PTPRD|PTPRO|RASGRF1|RFX2|ROBO2|SDC2|CXCL12|SGK1|SH3GL2|SLIT3|SPTBN1|BTG2|LST1|NR4A3|ITGA8|SEMA5A|DOK2|KLF4|SLIT2|ARHGEF6|SPAG6|FEZ1|ZEB2|ARHGAP44|FRY|NES|WASF3|NTNG1|ABLIM3|FLRT3|ARHGEF26|DNAI1|ANKRD1|TEKT2|PLA2G3|ZM…
GO:0006811	0.000609482	0.999582	117	1553	ion transport	BP	0.0157905	32|154|186|341|358|361|366|477|482|695|761|762|845|857|948|1262|1268|1318|1346|1490|1536|1636|1906|2040|2207|2247|2273|2352|2621|2697|2701|2702|2823|2824|2852|2890|3039|3040|3043|3553|3762|3772|3777|3949|4129|4638|4915|5023|5028|5138|5155|5243|5319|5320|5322|5348|5468|5581|5593|5923|6323|6330|6332|6347|6387|6446|6505|6532|6556|6565|6578|6622|6769|7402|7466|7881|9002|9022|9056|9120|9254|9619|10203…	ACACB|ADRB2|AGTR2|APOC1|AQP1|AQP4|AQP9|ATP1A2|ATP1B2|BTK|CA3|CA4|CASQ2|CAV1|CD36|CNGA4|CNR1|SLC31A2|COX7A1|CTGF|CYBB|ACE|EDN1|STOM|FCER1G|FGF2|FHL1|FOLR3|GAS6|GJA1|GJA4|GJA5|GPM6A|GPM6B|GPER1|GRIA1|HBA1|HBA2|HBB|IL1B|KCNJ5|KCNJ15|KCNK3|LDLR|MAOB|MYLK|NTRK2|P2RX1|P2RY1|PDE2A|PDGFB|ABCB1|PLA2G1B|PLA2G2A|PLA2G5|FXYD1|PPARG|PRKCE|PRKG2|RASGRF1|SCN1A|SCN4B|SCN7A|CCL2|CXCL12|SGK1|SLC1A1|SLC6A4|SLC11A1|…
GO:0032963	0.000611298	0.999799	16	111	collagen metabolic process	BP	0.0158111	1285|1305|1490|2022|3569|4239|4327|5468|6347|7148|23371|28984|55214|56729|131873|256076	COL4A3|COL13A1|CTGF|ENG|IL6|MFAP4|MMP19|PPARG|CCL2|TNXB|TNS2|RGCC|P3H2|RETN|COL6A6|COL6A5
GO:0072089	0.000616571	0.999798	16	107	stem cell proliferation	BP	0.0158975	947|1524|1636|2009|2192|2247|2263|3400|5243|6926|10763|54345|64321|64399|89780|120892	CD34|CX3CR1|ACE|EML1|FBLN1|FGF2|FGFR2|ID4|ABCB1|TBX3|NES|SOX18|SOX17|HHIP|WNT3A|LRRK2
GO:0002042	0.000616692	0.999894	8	33	cell migration involved in sprouting angiogenesis	BP	0.0158975	1960|2247|3164|4223|9314|9353|79812|90627	EGR3|FGF2|NR4A1|MEOX2|KLF4|SLIT2|MMRN2|STARD13
GO:0002791	0.000622645	0.999676	40	419	regulation of peptide secretion	BP	0.0160243	186|284|322|408|947|1268|2219|2268|2615|2621|2697|2702|2852|3133|3553|3569|4023|5319|5581|5734|5950|6711|7099|8622|8862|9173|9254|11069|23705|25924|26253|27063|28984|51092|51311|51744|80223|90865|338442|338557	AGTR2|ANGPT1|APBB1|ARRB1|CD34|CNR1|FCN1|FGR|LRRC32|GAS6|GJA1|GJA5|GPER1|HLA-E|IL1B|IL6|LPL|PLA2G1B|PRKCE|PTGER4|RBP4|SPTBN1|TLR4|PDE8B|APLN|IL1RL1|CACNA2D2|RAPGEF4|CADM1|MYRIP|CLEC4E|ANKRD1|RGCC|SIDT2|TLR8|CD244|RAB11FIP1|IL33|HCAR2|FFAR4
GO:0043393	0.000627925	0.999749	22	182	regulation of protein binding	BP	0.0161334	154|284|408|627|650|857|1440|1601|3084|4242|5155|5334|6368|6590|7049|10763|55118|84959|89780|120892|140706|255738	ADRB2|ANGPT1|ARRB1|BDNF|BMP2|CAV1|CSF3|DAB2|NRG1|MFNG|PDGFB|PLCL1|CCL23|SLPI|TGFBR3|NES|CRTAC1|UBASH3B|WNT3A|LRRK2|CCM2L|PCSK9
GO:0072073	0.000643204	0.999764	19	140	kidney epithelium development	BP	0.0164986	186|650|847|947|2247|2263|2719|4091|4093|5175|5800|6092|6943|9353|28999|79192|79633|168667|255743	AGTR2|BMP2|CAT|CD34|FGF2|FGFR2|GPC3|SMAD6|SMAD9|PECAM1|PTPRO|ROBO2|TCF21|SLIT2|KLF15|IRX1|FAT4|BMPER|NPNT
GO:0051017	0.00064656	0.99977	18	129	actin filament bundle assembly	BP	0.0165573	395|408|1490|1901|4739|5295|5734|9647|10174|10395|10580|11346|22899|28984|85358|90102|171024|221692	ARHGAP6|ARRB1|CTGF|S1PR1|NEDD9|PIK3R1|PTGER4|PPM1F|SORBS3|DLC1|SORBS1|SYNPO|ARHGEF15|RGCC|SHANK3|PHLDB2|SYNPO2|PHACTR1
GO:0072239	0.000652842	0.999969	4	8	metanephric glomerulus vasculature development	BP	0.0166906	947|1958|5155|6943	CD34|EGR1|PDGFB|TCF21
GO:0035812	0.000657724	0.999921	6	22	renal sodium excretion	BP	0.0167601	185|186|554|1906|1910|4881	AGTR1|AGTR2|AVPR2|EDN1|EDNRB|NPR1
GO:0035813	0.000657724	0.999921	6	22	regulation of renal sodium excretion	BP	0.0167601	185|186|554|1906|1910|4881	AGTR1|AGTR2|AVPR2|EDN1|EDNRB|NPR1
GO:0006957	0.000666719	0.999943	5	14	complement activation, alternative pathway	BP	0.0169614	730|732|1675|5199|11326	C7|C8B|CFD|CFP|VSIG4
GO:0048634	0.000670044	0.999769	17	122	regulation of muscle organ development	BP	0.017018	650|1906|2247|2263|2627|2697|3084|3569|5950|6909|6910|7048|7049|23493|57158|64321|89780	BMP2|EDN1|FGF2|FGFR2|GATA6|GJA1|NRG1|IL6|RBP4|TBX2|TBX5|TGFBR2|TGFBR3|HEY2|JPH2|SOX17|WNT3A
GO:0001955	0.000689741	0.999966	4	8	blood vessel maturation	BP	0.0174896	94|1003|1901|8434	ACVRL1|CDH5|S1PR1|RECK
GO:0003229	0.000693093	0.999843	10	52	ventricular cardiac muscle tissue development	BP	0.0175459	2022|2263|3084|6910|6926|7049|7134|23493|57493|140706	ENG|FGFR2|NRG1|TBX5|TBX3|TGFBR3|TNNC1|HEY2|HEG1|CCM2L
GO:0003104	0.000700923	0.99999	3	4	positive regulation of glomerular filtration	BP	0.0177152	2621|2697|5155	GAS6|GJA1|PDGFB
GO:0010885	0.000710359	0.99994	5	13	regulation of cholesterol storage	BP	0.0179244	948|4023|4481|5468|9619	CD36|LPL|MSR1|PPARG|ABCG1
GO:0043067	0.000711784	0.999518	106	1406	regulation of programmed cell death	BP	0.0179312	186|284|322|358|408|467|597|627|650|695|728|847|857|894|1268|1271|1285|1410|1490|1601|1843|1906|1910|1958|1960|2207|2263|2621|2627|2662|2852|2869|3055|3071|3202|3491|3553|3569|4091|4332|4616|4915|5023|5166|5196|5295|5414|5468|5588|5737|5740|6347|6387|6446|6622|6910|6926|7010|7044|7078|7128|7466|7538|7704|7832|8013|8742|8835|9021|9037|9314|9353|9459|9647|9770|10266|10395|10763|23493|23604|25959|26…	AGTR2|ANGPT1|APBB1|AQP1|ARRB1|ATF3|BCL2A1|BDNF|BMP2|BTK|C5AR1|CAT|CAV1|CCND2|CNR1|CNTFR|COL4A3|CRYAB|CTGF|DAB2|DUSP1|EDN1|EDNRB|EGR1|EGR3|FCER1G|FGFR2|GAS6|GATA6|GDF10|GPER1|GRK5|HCK|NCKAP1L|HOXA5|CYR61|IL1B|IL6|SMAD6|MNDA|GADD45B|NTRK2|P2RX1|PDK4|PF4|PIK3R1|SEPT4|PPARG|PRKCQ|PTGFR|PTGIS|CCL2|CXCL12|SGK1|SNCA|TBX5|TBX3|TEK|LEFTY2|TIMP3|TNFAIP3|WFS1|ZFP36|ZBTB16|BTG2|NR4A3|TNFSF12|SOCS2|SOCS3|SEMA…
GO:0022008	0.000713985	0.99951	114	1444	neurogenesis	BP	0.0179574	104|177|322|590|627|650|659|745|1268|1524|1808|1901|1910|1959|2009|2115|2263|2277|2549|2621|2624|2674|2697|2823|2852|3084|3400|3569|3730|4211|4628|4915|4919|4969|4974|5028|5295|5376|5468|5588|5592|5789|5800|5923|6092|6347|6383|6387|6446|6456|6532|6586|6711|6886|6925|6935|7099|7832|7940|8013|8322|8613|9037|9046|9314|9353|9638|9839|9912|10129|10319|10810|22854|23287|23493|23767|26468|27063|27255|28…	ADARB1|AGER|APBB1|BCHE|BDNF|BMP2|BMPR2|MYRF|CNR1|CX3CR1|DPYSL2|S1PR1|EDNRB|EGR2|EML1|ETV1|FGFR2|VEGFD|GAB1|GAS6|GATA2|GFRA1|GJA1|GPM6A|GPER1|NRG1|ID4|IL6|ANOS1|MEIS1|MYH10|NTRK2|ROR1|OGN|OMG|P2RY1|PIK3R1|PMP22|PPARG|PRKCQ|PRKG1|PTPRD|PTPRO|RASGRF1|ROBO2|CCL2|SDC2|CXCL12|SGK1|SH3GL2|SLC6A4|SLIT3|SPTBN1|TAL1|TCF4|ZEB1|TLR4|BTG2|LST1|NR4A3|FZD4|PLPP3|SEMA5A|DOK2|KLF4|SLIT2|FEZ1|ZEB2|ARHGAP44|FRY|LAM…
GO:0010002	0.000715558	0.999916	6	19	cardioblast differentiation	BP	0.0179678	2627|3084|6909|6910|89780|144165	GATA6|NRG1|TBX2|TBX5|WNT3A|PRICKLE1
GO:0042981	0.000729244	0.999507	105	1392	regulation of apoptotic process	BP	0.0182818	186|284|322|358|408|467|597|627|650|695|728|847|857|894|1268|1271|1285|1410|1490|1601|1843|1906|1910|1958|1960|2207|2263|2621|2627|2662|2852|2869|3055|3071|3202|3491|3553|3569|4091|4332|4616|4915|5023|5166|5196|5295|5414|5468|5588|5737|5740|6347|6387|6446|6622|6910|6926|7010|7044|7078|7128|7466|7538|7704|7832|8013|8742|8835|9021|9037|9314|9353|9459|9647|9770|10266|10395|10763|23493|23604|26084|26…	AGTR2|ANGPT1|APBB1|AQP1|ARRB1|ATF3|BCL2A1|BDNF|BMP2|BTK|C5AR1|CAT|CAV1|CCND2|CNR1|CNTFR|COL4A3|CRYAB|CTGF|DAB2|DUSP1|EDN1|EDNRB|EGR1|EGR3|FCER1G|FGFR2|GAS6|GATA6|GDF10|GPER1|GRK5|HCK|NCKAP1L|HOXA5|CYR61|IL1B|IL6|SMAD6|MNDA|GADD45B|NTRK2|P2RX1|PDK4|PF4|PIK3R1|SEPT4|PPARG|PRKCQ|PTGFR|PTGIS|CCL2|CXCL12|SGK1|SNCA|TBX5|TBX3|TEK|LEFTY2|TIMP3|TNFAIP3|WFS1|ZFP36|ZBTB16|BTG2|NR4A3|TNFSF12|SOCS2|SOCS3|SEMA…
GO:0018410	0.000731253	0.999801	12	80	C-terminal protein amino acid modification	BP	0.0183026	683|1043|2215|4045|8434|22854|23287|50863|51299|257194|266727|338328	BST1|CD52|FCGR3B|LSAMP|RECK|NTNG1|AGTPBP1|NTM|NRN1|NEGR1|MDGA1|GPIHBP1
GO:0002009	0.000736463	0.99959	48	514	morphogenesis of an epithelium	BP	0.0183926	94|186|650|1601|1839|1906|2022|2247|2263|2294|2719|3202|3400|3491|3569|4855|4919|6909|6910|6926|6943|7048|8322|9021|9314|9353|9496|9839|10395|23767|25928|54345|54922|59277|64321|64399|65009|79192|79633|80144|85407|89780|90102|90627|144165|200894|255743|340419	ACVRL1|AGTR2|BMP2|DAB2|HBEGF|EDN1|ENG|FGF2|FGFR2|FOXF1|GPC3|HOXA5|ID4|CYR61|IL6|NOTCH4|ROR1|TBX2|TBX5|TBX3|TCF21|TGFBR2|FZD4|SOCS3|KLF4|SLIT2|TBX4|ZEB2|DLC1|FLRT3|SOSTDC1|SOX18|RASIP1|NTN4|SOX17|HHIP|NDRG4|IRX1|FAT4|FRAS1|NKD1|WNT3A|PHLDB2|STARD13|PRICKLE1|ARL13B|NPNT|RSPO2
GO:0055008	0.000737224	0.999816	11	62	cardiac muscle tissue morphogenesis	BP	0.0183926	650|1901|2022|2263|3084|7049|7134|23493|27063|57493|140706	BMP2|S1PR1|ENG|FGFR2|NRG1|TGFBR3|TNNC1|HEY2|ANKRD1|HEG1|CCM2L
GO:0010595	0.000754879	0.999796	12	71	positive regulation of endothelial cell migration	BP	0.0188028	284|306|659|1906|2247|5155|7010|8613|9037|23328|84913|154810	ANGPT1|ANXA3|BMPR2|EDN1|FGF2|PDGFB|TEK|PLPP3|SEMA5A|SASH1|ATOH8|AMOTL1
GO:0007200	0.000775431	0.99975	15	110	phospholipase C-activating G-protein coupled receptor signaling pathway	BP	0.0192837	185|728|1901|1906|1910|2357|2358|2828|3579|4883|5028|5745|9002|10316|51196	AGTR1|C5AR1|S1PR1|EDN1|EDNRB|FPR1|FPR2|GPR4|CXCR2|NPR3|P2RY1|PTH1R|F2RL3|NMUR1|PLCE1
GO:2001212	0.000789442	0.99993	5	14	regulation of vasculogenesis	BP	0.0196007	947|2013|10266|23493|55273	CD34|EMP2|RAMP2|HEY2|TMEM100
GO:1905063	0.000804699	0.999959	4	8	regulation of vascular smooth muscle cell differentiation	BP	0.0199475	2022|2852|5155|23493	ENG|GPER1|PDGFB|HEY2
GO:0021537	0.000814929	0.999633	27	236	telencephalon development	BP	0.02014	306|358|554|597|650|3084|3400|4628|4900|4915|6092|6387|6867|7832|8013|9353|9839|23287|26468|55118|79633|84879|85358|85458|89780|120892|200894	ANXA3|AQP1|AVPR2|BCL2A1|BMP2|NRG1|ID4|MYH10|NRGN|NTRK2|ROBO2|CXCL12|TACC1|BTG2|NR4A3|SLIT2|ZEB2|AGTPBP1|LHX6|CRTAC1|FAT4|MFSD2A|SHANK3|DIXDC1|WNT3A|LRRK2|ARL13B
GO:0007160	0.000815066	0.999653	24	197	cell-matrix adhesion	BP	0.02014	94|395|683|947|948|1012|1305|1490|1842|2013|2824|5295|6614|7010|7402|8516|9647|10395|10516|10580|10894|83700|90102|255743	ACVRL1|ARHGAP6|BST1|CD34|CD36|CDH13|COL13A1|CTGF|ECM2|EMP2|GPM6B|PIK3R1|SIGLEC1|TEK|UTRN|ITGA8|PPM1F|DLC1|FBLN5|SORBS1|LYVE1|JAM3|PHLDB2|NPNT
GO:0045576	0.000817257	0.99981	10	56	mast cell activation	BP	0.020162	695|1268|2207|2268|2294|2624|6283|8013|50487|146722	BTK|CNR1|FCER1G|FGR|FOXF1|GATA2|S100A12|NR4A3|PLA2G3|CD300LF
GO:0001819	0.000829068	0.999574	37	391	positive regulation of cytokine production	BP	0.0204209	177|186|728|947|948|1536|1958|2207|2219|2268|3133|3553|3569|4023|5196|5295|5588|5734|6347|6556|6693|6711|7099|8013|8809|9173|9308|23705|26253|28984|51311|51744|57493|89780|90865|140706|150372	AGER|AGTR2|C5AR1|CD34|CD36|CYBB|EGR1|FCER1G|FCN1|FGR|HLA-E|IL1B|IL6|LPL|PF4|PIK3R1|PRKCQ|PTGER4|CCL2|SLC11A1|SPN|SPTBN1|TLR4|NR4A3|IL18R1|IL1RL1|CD83|CADM1|CLEC4E|RGCC|TLR8|CD244|HEG1|WNT3A|IL33|CCM2L|NFAM1
GO:0001823	0.000833232	0.99973	15	102	mesonephros development	BP	0.0204909	186|650|847|2247|2263|2719|4091|4093|6092|6943|7704|9353|79633|168667|255743	AGTR2|BMP2|CAT|FGF2|FGFR2|GPC3|SMAD6|SMAD9|ROBO2|TCF21|ZBTB16|SLIT2|FAT4|BMPER|NPNT
GO:0055065	0.000850417	0.999519	49	556	metal ion homeostasis	BP	0.0208804	185|186|477|482|554|728|730|845|857|948|1043|1318|1901|1906|1910|2034|2247|2357|2358|2624|2697|2828|2852|2890|3777|4881|5028|5319|5581|5745|6332|6347|6358|6368|6387|6556|6622|7466|8698|9002|9365|9429|51196|57158|64116|79901|84959|130733|286133	AGTR1|AGTR2|ATP1A2|ATP1B2|AVPR2|C5AR1|C7|CASQ2|CAV1|CD36|CD52|SLC31A2|S1PR1|EDN1|EDNRB|EPAS1|FGF2|FPR1|FPR2|GATA2|GJA1|GPR4|GPER1|GRIA1|KCNK3|NPR1|P2RY1|PLA2G1B|PRKCE|PTH1R|SCN7A|CCL2|CCL14|CCL23|CXCL12|SLC11A1|SNCA|WFS1|S1PR4|F2RL3|KL|ABCG2|PLCE1|JPH2|SLC39A8|CYBRD1|UBASH3B|TMEM178A|SCARA5
GO:0060347	0.000868038	0.99992	5	15	heart trabecula formation	BP	0.0212793	5950|7010|7049|9510|23493	RBP4|TEK|TGFBR3|ADAMTS1|HEY2
GO:0006875	0.000870481	0.999523	44	488	cellular metal ion homeostasis	BP	0.0213055	185|186|477|482|728|730|845|857|948|1043|1318|1901|1906|1910|2247|2357|2358|2624|2697|2828|2852|2890|3777|5028|5319|5581|5745|6347|6358|6368|6387|6556|6622|7466|8698|9002|9429|51196|57158|64116|79901|84959|130733|286133	AGTR1|AGTR2|ATP1A2|ATP1B2|C5AR1|C7|CASQ2|CAV1|CD36|CD52|SLC31A2|S1PR1|EDN1|EDNRB|FGF2|FPR1|FPR2|GATA2|GJA1|GPR4|GPER1|GRIA1|KCNK3|P2RY1|PLA2G1B|PRKCE|PTH1R|CCL2|CCL14|CCL23|CXCL12|SLC11A1|SNCA|WFS1|S1PR4|F2RL3|ABCG2|PLCE1|JPH2|SLC39A8|CYBRD1|UBASH3B|TMEM178A|SCARA5
GO:1902107	0.000874891	0.99969	17	132	positive regulation of leukocyte differentiation	BP	0.0213796	177|695|1960|2353|2621|3071|3142|3569|3575|5196|7048|7704|9308|9398|81501|133522|146433	AGER|BTK|EGR3|FOS|GAS6|NCKAP1L|HLX|IL6|IL7R|PF4|TGFBR2|ZBTB16|CD83|CD101|DCSTAMP|PPARGC1B|IL34
GO:0051610	0.000876274	0.999986	3	4	serotonin uptake	BP	0.0213797	2824|6532|6622	GPM6B|SLC6A4|SNCA
GO:0097006	0.000882171	0.999792	10	58	regulation of plasma lipoprotein particle levels	BP	0.0214897	185|341|948|3949|4023|4481|5320|9619|255738|338328	AGTR1|APOC1|CD36|LDLR|LPL|MSR1|PLA2G2A|ABCG1|PCSK9|GPIHBP1
GO:1904036	0.000902114	0.999832	8	36	negative regulation of epithelial cell apoptotic process	BP	0.021941	284|2621|7010|7128|7466|9037|10266|79625	ANGPT1|GAS6|TEK|TNFAIP3|WFS1|SEMA5A|RAMP2|NDNF
GO:0032958	0.000919821	0.999883	6	21	inositol phosphate biosynthetic process	BP	0.0223366	2247|2852|5028|5745|6622|51744	FGF2|GPER1|P2RY1|PTH1R|SNCA|CD244
GO:0046320	0.000921522	0.999855	7	28	regulation of fatty acid oxidation	BP	0.022343	32|33|1268|5166|5468|8013|114898	ACACB|ACADL|CNR1|PDK4|PPARG|NR4A3|C1QTNF2
GO:0045932	0.000928412	0.999882	6	21	negative regulation of muscle contraction	BP	0.0224703	154|477|5592|8654|9732|10203	ADRB2|ATP1A2|PRKG1|PDE5A|DOCK4|CALCRL
GO:0022604	0.000929675	0.999498	42	424	regulation of cell morphogenesis	BP	0.0224703	627|659|1808|2192|2268|3055|3084|3569|4628|4915|4974|5168|5789|5800|6092|6347|6369|6383|6387|7940|8994|9037|9353|9839|9912|10395|10630|10810|23237|51393|54873|56920|57381|57580|64411|85358|89780|91663|93663|120892|152273|161176	BDNF|BMPR2|DPYSL2|FBLN1|FGR|HCK|NRG1|IL6|MYH10|NTRK2|OMG|ENPP2|PTPRD|PTPRO|ROBO2|CCL2|CCL24|SDC2|CXCL12|LST1|LIMD1|SEMA5A|SLIT2|ZEB2|ARHGAP44|DLC1|PDPN|WASF3|ARC|TRPV2|PALMD|SEMA3G|RHOJ|PREX1|ARAP3|SHANK3|WNT3A|MYADM|ARHGAP18|LRRK2|FGD5|SYNE3
GO:0032680	0.000940098	0.999705	14	101	regulation of tumor necrosis factor production	BP	0.0226709	284|947|948|1536|2207|2621|3133|5196|5295|6347|6693|7099|7128|7538	ANGPT1|CD34|CD36|CYBB|FCER1G|GAS6|HLA-E|PF4|PIK3R1|CCL2|SPN|TLR4|TNFAIP3|ZFP36
GO:0045123	0.000940902	0.999798	9	47	cellular extravasation	BP	0.0226709	683|5175|5734|6347|6387|6401|6403|6404|120425	BST1|PECAM1|PTGER4|CCL2|CXCL12|SELE|SELP|SELPLG|JAML
GO:0010193	0.000960153	0.999977	3	5	response to ozone	BP	0.0230988	847|1906|7356	CAT|EDN1|SCGB1A1
GO:1903428	0.000965298	0.999792	9	47	positive regulation of reactive oxygen species biosynthetic process	BP	0.0231442	186|1906|3043|3553|3569|5806|7099|9314|10365	AGTR2|EDN1|HBB|IL1B|IL6|PTX3|TLR4|KLF4|KLF2
GO:0010633	0.000965927	0.99977	10	55	negative regulation of epithelial cell migration	BP	0.0231442	94|186|1634|2247|4223|9314|9353|28984|79812|90627	ACVRL1|AGTR2|DCN|FGF2|MEOX2|KLF4|SLIT2|RGCC|MMRN2|STARD13
GO:0010919	0.000967205	0.999908	5	15	regulation of inositol phosphate biosynthetic process	BP	0.0231442	2852|5028|5745|6622|51744	GPER1|P2RY1|PTH1R|SNCA|CD244
GO:0003230	0.000968016	0.999819	8	35	cardiac atrium development	BP	0.0231442	659|2022|2702|3491|6910|23493|57493|140706	BMPR2|ENG|GJA5|CYR61|TBX5|HEY2|HEG1|CCM2L
GO:0042116	0.00100716	0.999758	10	57	macrophage activation	BP	0.0240419	1524|5581|6556|6622|7099|7305|9173|22918|51311|90865	CX3CR1|PRKCE|SLC11A1|SNCA|TLR4|TYROBP|IL1RL1|CD93|TLR8|IL33
GO:0031214	0.00100939	0.999637	17	130	biomineral tissue development	BP	0.0240419	154|246|650|659|1901|2263|2621|2719|2824|4921|5251|5745|7123|9365|54959|340419|359845	ADRB2|ALOX15|BMP2|BMPR2|S1PR1|FGFR2|GAS6|GPC3|GPM6B|DDR2|PHEX|PTH1R|CLEC3B|KL|ODAM|RSPO2|RFLNB
GO:0071774	0.00101022	0.999624	18	141	response to fibroblast growth factor	BP	0.0240419	1490|1960|2247|2263|2264|3164|3340|3373|3730|6347|6622|7356|7538|9365|23767|64399|79633|152831	CTGF|EGR3|FGF2|FGFR2|FGFR4|NR4A1|NDST1|HYAL1|ANOS1|CCL2|SNCA|SCGB1A1|ZFP36|KL|FLRT3|HHIP|FAT4|KLB
GO:0061138	0.00103444	0.99957	22	180	morphogenesis of a branching epithelium	BP	0.0245805	186|650|1906|2022|2247|2263|2294|2719|3202|3569|4855|6926|6943|7048|9021|9353|54922|59277|64399|79633|255743|340419	AGTR2|BMP2|EDN1|ENG|FGF2|FGFR2|FOXF1|GPC3|HOXA5|IL6|NOTCH4|TBX3|TCF21|TGFBR2|SOCS3|SLIT2|RASIP1|NTN4|HHIP|FAT4|NPNT|RSPO2
GO:0006501	0.00103972	0.999725	11	73	C-terminal protein lipidation	BP	0.0246683	683|1043|2215|4045|8434|22854|50863|51299|257194|266727|338328	BST1|CD52|FCGR3B|LSAMP|RECK|NTNG1|NTM|NRN1|NEGR1|MDGA1|GPIHBP1
GO:0007417	0.00104595	0.999332	75	899	central nervous system development	BP	0.0247782	104|177|186|306|358|554|597|650|659|728|745|1808|1827|1901|1959|2009|2022|2263|2624|3084|3340|3400|3777|4093|4129|4628|4900|4915|4919|5414|5468|5592|6092|6387|6414|6456|6532|6751|6867|6886|6926|6935|7048|7099|7704|7832|7881|8013|8322|8516|8613|9037|9353|9839|10319|10395|10763|10810|23287|26468|27255|53358|55118|55130|57447|57477|79633|80031|84879|85358|85458|89780|120892|200894|266727	ADARB1|AGER|AGTR2|ANXA3|AQP1|AVPR2|BCL2A1|BMP2|BMPR2|C5AR1|MYRF|DPYSL2|RCAN1|S1PR1|EGR2|EML1|ENG|FGFR2|GATA2|NRG1|NDST1|ID4|KCNK3|SMAD9|MAOB|MYH10|NRGN|NTRK2|ROR1|SEPT4|PPARG|PRKG1|ROBO2|CXCL12|SELENOP|SH3GL2|SLC6A4|SSTR1|TACC1|TAL1|TBX3|ZEB1|TGFBR2|TLR4|ZBTB16|BTG2|KCNAB1|NR4A3|FZD4|ITGA8|PLPP3|SEMA5A|SLIT2|ZEB2|LAMC3|DLC1|NES|WASF3|AGTPBP1|LHX6|CNTN6|SHC3|CRTAC1|ARMC4|NDRG2|SHROOM4|FAT4|SEMA6D|…
GO:0045844	0.00107233	0.999719	11	63	positive regulation of striated muscle tissue development	BP	0.0253257	1906|2247|2263|2627|3084|6909|6910|7049|23493|64321|89780	EDN1|FGF2|FGFR2|GATA6|NRG1|TBX2|TBX5|TGFBR3|HEY2|SOX17|WNT3A
GO:0048636	0.00107233	0.999719	11	63	positive regulation of muscle organ development	BP	0.0253257	1906|2247|2263|2627|3084|6909|6910|7049|23493|64321|89780	EDN1|FGF2|FGFR2|GATA6|NRG1|TBX2|TBX5|TGFBR3|HEY2|SOX17|WNT3A
GO:0051591	0.00108728	0.999655	14	94	response to cAMP	BP	0.0256395	358|366|1036|1843|2353|2354|2819|3727|4327|5322|7010|7056|53905|133522	AQP1|AQP9|CDO1|DUSP1|FOS|FOSB|GPD1|JUND|MMP19|PLA2G5|TEK|THBD|DUOX1|PPARGC1B
GO:0042592	0.00109395	0.999233	119	1621	homeostatic process	BP	0.0257576	32|33|153|154|177|185|186|358|361|366|408|477|482|554|728|730|845|857|947|948|1043|1073|1268|1318|1361|1490|1536|1634|1901|1906|1910|2034|2167|2207|2247|2264|2273|2357|2358|2621|2624|2697|2702|2828|2852|2890|3071|3101|3202|3553|3569|3575|3777|3949|3953|3988|4023|4688|4881|5028|5166|5295|5319|5468|5581|5588|5745|5950|6332|6347|6358|6368|6387|6441|6556|6622|6688|6886|7049|7099|7128|7466|7538|8013|8…	ACACB|ACADL|ADRB1|ADRB2|AGER|AGTR1|AGTR2|AQP1|AQP4|AQP9|ARRB1|ATP1A2|ATP1B2|AVPR2|C5AR1|C7|CASQ2|CAV1|CD34|CD36|CD52|CFL2|CNR1|SLC31A2|CPB2|CTGF|CYBB|DCN|S1PR1|EDN1|EDNRB|EPAS1|FABP4|FCER1G|FGF2|FGFR4|FHL1|FPR1|FPR2|GAS6|GATA2|GJA1|GJA5|GPR4|GPER1|GRIA1|NCKAP1L|HK3|HOXA5|IL1B|IL6|IL7R|KCNK3|LDLR|LEPR|LIPA|LPL|NCF2|NPR1|P2RY1|PDK4|PIK3R1|PLA2G1B|PPARG|PRKCE|PRKCQ|PTH1R|RBP4|SCN7A|CCL2|CCL14|CCL23|…
GO:0001101	0.00110427	0.999453	32	319	response to acid chemical	BP	0.0259613	358|590|847|948|1036|1490|1536|1843|1906|1958|2697|3569|3949|4915|5155|5166|5468|5581|5734|5737|5950|6347|6532|6935|7049|7075|7356|8322|9314|27244|55022|89780	AQP1|BCHE|CAT|CD36|CDO1|CTGF|CYBB|DUSP1|EDN1|EGR1|GJA1|IL6|LDLR|NTRK2|PDGFB|PDK4|PPARG|PRKCE|PTGER4|PTGFR|RBP4|CCL2|SLC6A4|ZEB1|TGFBR3|TIE1|SCGB1A1|FZD4|KLF4|SESN1|PID1|WNT3A
GO:0009790	0.00111134	0.999282	78	949	embryo development	BP	0.0260879	94|187|284|650|659|729|1843|1906|2022|2034|2202|2247|2263|2294|2549|2624|2627|2702|2719|3084|3142|3202|3340|3373|3491|3899|4091|4222|4223|4628|4855|5155|5950|6886|6909|6910|6926|6935|6943|7048|7075|7704|8013|8434|8516|8613|8796|9021|9314|9496|9839|10365|10395|10742|10763|23493|23764|23767|26524|51294|54345|55084|55273|57493|64321|65009|79192|80144|83595|84913|85407|89780|90102|91663|144165|200894…	ACVRL1|APLNR|ANGPT1|BMP2|BMPR2|C6|DUSP1|EDN1|ENG|EPAS1|EFEMP1|FGF2|FGFR2|FOXF1|GAB1|GATA2|GATA6|GJA5|GPC3|NRG1|HLX|HOXA5|NDST1|HYAL1|CYR61|AFF3|SMAD6|MEOX1|MEOX2|MYH10|NOTCH4|PDGFB|RBP4|TAL1|TBX2|TBX5|TBX3|ZEB1|TCF21|TGFBR2|TIE1|ZBTB16|NR4A3|RECK|ITGA8|PLPP3|SCEL|SOCS3|KLF4|TBX4|ZEB2|KLF2|DLC1|RAI2|NES|HEY2|MAFF|FLRT3|LATS2|PCDH12|SOX18|SOBP|TMEM100|HEG1|SOX17|NDRG4|IRX1|FRAS1|SOX7|ATOH8|NKD1|WNT…
GO:0007585	0.00112526	0.999702	11	66	respiratory gaseous exchange	BP	0.0263747	477|1602|1906|3202|3340|6440|6441|7134|8862|653509|729238	ATP1A2|DACH1|EDN1|HOXA5|NDST1|SFTPC|SFTPD|TNNC1|APLN|SFTPA1|SFTPA2
GO:0051480	0.00112943	0.999454	30	298	regulation of cytosolic calcium ion concentration	BP	0.0264325	185|477|728|845|857|948|1043|1901|1906|1910|2247|2357|2358|2624|2697|2828|2852|2890|3777|5028|5319|5581|5745|6622|8698|9002|51196|57158|84959|130733	AGTR1|ATP1A2|C5AR1|CASQ2|CAV1|CD36|CD52|S1PR1|EDN1|EDNRB|FGF2|FPR1|FPR2|GATA2|GJA1|GPR4|GPER1|GRIA1|KCNK3|P2RY1|PLA2G1B|PRKCE|PTH1R|SNCA|S1PR4|F2RL3|PLCE1|JPH2|UBASH3B|TMEM178A
GO:0060100	0.00113968	0.999931	4	9	positive regulation of phagocytosis, engulfment	BP	0.026592	948|2624|3071|5468	CD36|GATA2|NCKAP1L|PPARG
GO:1905155	0.00113968	0.999931	4	9	positive regulation of membrane invagination	BP	0.026592	948|2624|3071|5468	CD36|GATA2|NCKAP1L|PPARG
GO:0051222	0.00114761	0.999372	42	460	positive regulation of protein transport	BP	0.0267368	186|322|408|947|1440|1601|2040|2219|2268|2621|2697|2852|3084|3133|3553|3569|4023|5295|5319|5581|5734|5950|6347|6711|7099|8809|9037|9173|10316|22885|23705|25924|26253|27063|28984|51311|51744|89780|90506|90865|123264|338442	AGTR2|APBB1|ARRB1|CD34|CSF3|DAB2|STOM|FCN1|FGR|GAS6|GJA1|GPER1|NRG1|HLA-E|IL1B|IL6|LPL|PIK3R1|PLA2G1B|PRKCE|PTGER4|RBP4|CCL2|SPTBN1|TLR4|IL18R1|SEMA5A|IL1RL1|NMUR1|ABLIM3|CADM1|MYRIP|CLEC4E|ANKRD1|RGCC|TLR8|CD244|WNT3A|LRRC46|IL33|SLC51B|HCAR2
GO:0032640	0.00115248	0.999629	14	103	tumor necrosis factor production	BP	0.0267469	284|947|948|1536|2207|2621|3133|5196|5295|6347|6693|7099|7128|7538	ANGPT1|CD34|CD36|CYBB|FCER1G|GAS6|HLA-E|PF4|PIK3R1|CCL2|SPN|TLR4|TNFAIP3|ZFP36
GO:0042493	0.00115317	0.99939	38	408	response to drug	BP	0.0267469	21|32|358|408|590|847|1361|1536|1580|1906|2022|2203|2353|2354|2621|2627|3071|3553|3569|3727|3777|4023|4129|5138|5243|5468|6347|6532|6565|6622|7048|7356|9429|9647|10351|27063|58189|94274	ABCA3|ACACB|AQP1|ARRB1|BCHE|CAT|CPB2|CYBB|CYP4B1|EDN1|ENG|FBP1|FOS|FOSB|GAS6|GATA6|NCKAP1L|IL1B|IL6|JUND|KCNK3|LPL|MAOB|PDE2A|ABCB1|PPARG|CCL2|SLC6A4|SLC15A2|SNCA|TGFBR2|SCGB1A1|ABCG2|PPM1F|ABCA8|ANKRD1|WFDC1|PPP1R14A
GO:0099010	0.00115323	0.99998	3	4	modification of postsynaptic structure	BP	0.0267469	4628|9912|11346	MYH10|ARHGAP44|SYNPO
GO:0044706	0.00115513	0.999503	23	212	multi-multicellular organism process	BP	0.0267511	181|659|1268|1906|2013|2192|2353|2354|2697|3553|5023|5737|5740|6347|6532|7048|7056|7356|8434|8528|10266|23764|53405	AGRP|BMPR2|CNR1|EDN1|EMP2|FBLN1|FOS|FOSB|GJA1|IL1B|P2RX1|PTGFR|PTGIS|CCL2|SLC6A4|TGFBR2|THBD|SCGB1A1|RECK|DDO|RAMP2|MAFF|CLIC5
GO:0050710	0.00116098	0.999743	9	48	negative regulation of cytokine secretion	BP	0.0268087	284|947|2615|2621|3569|5734|28984|51311|338557	ANGPT1|CD34|LRRC32|GAS6|IL6|PTGER4|RGCC|TLR8|FFAR4
GO:0051024	0.00116108	0.999923	4	11	positive regulation of immunoglobulin secretion	BP	0.0268087	3133|3569|5950|90865	HLA-E|IL6|RBP4|IL33
GO:0022407	0.00116864	0.999387	37	394	regulation of cell-cell adhesion	BP	0.0269431	177|246|857|1178|1326|1960|2615|3071|3133|3142|3553|3569|3575|5295|5588|5592|6347|6387|6441|6693|6935|7048|7356|7704|8013|8613|8654|9308|9314|11326|28984|51744|57864|84959|89780|91663|140706	AGER|ALOX15|CAV1|CLC|MAP3K8|EGR3|LRRC32|NCKAP1L|HLA-E|HLX|IL1B|IL6|IL7R|PIK3R1|PRKCQ|PRKG1|CCL2|CXCL12|SFTPD|SPN|ZEB1|TGFBR2|SCGB1A1|ZBTB16|NR4A3|PLPP3|PDE5A|CD83|KLF4|VSIG4|RGCC|CD244|SLC46A2|UBASH3B|WNT3A|MYADM|CCM2L
GO:0001885	0.00117562	0.999713	10	54	endothelial cell development	BP	0.0270638	1003|2022|3553|4855|5138|7122|26084|54345|57493|91663	CDH5|ENG|IL1B|NOTCH4|PDE2A|CLDN5|ARHGEF26|SOX18|HEG1|MYADM
GO:0032623	0.00118467	0.999709	10	57	interleukin-2 production	BP	0.0271913	947|3553|5588|6441|6556|6711|7128|7538|9308|11326	CD34|IL1B|PRKCQ|SFTPD|SLC11A1|SPTBN1|TNFAIP3|ZFP36|CD83|VSIG4
GO:0048640	0.00118467	0.999661	12	74	negative regulation of developmental growth	BP	0.0271913	153|154|2697|5950|6532|6910|7048|9037|56920|80014|85407|89780	ADRB1|ADRB2|GJA1|RBP4|SLC6A4|TBX5|TGFBR2|SEMA5A|SEMA3G|WWC2|NKD1|WNT3A
GO:0060353	0.00118646	0.999969	3	5	regulation of cell adhesion molecule production	BP	0.0271921	857|3553|81035	CAV1|IL1B|COLEC12
GO:1901653	0.00120809	0.999399	32	320	cellular response to peptide	BP	0.0276468	185|186|857|858|1906|2549|2690|2791|2852|3164|3553|3569|5166|5295|5319|5468|5588|6347|8013|8835|8850|9021|9314|9365|10365|10580|28999|55022|64397|196883|245972|255738	AGTR1|AGTR2|CAV1|CAV2|EDN1|GAB1|GHR|GNG11|GPER1|NR4A1|IL1B|IL6|PDK4|PIK3R1|PLA2G1B|PPARG|PRKCQ|CCL2|NR4A3|SOCS2|KAT2B|SOCS3|KLF4|KL|KLF2|SORBS1|KLF15|PID1|ZNF106|ADCY4|ATP6V0D2|PCSK9
GO:0071417	0.00121948	0.999311	46	503	cellular response to organonitrogen compound	BP	0.0278504	185|186|358|366|845|857|858|1536|1906|1958|2549|2690|2791|2819|2852|3164|3553|3569|4915|5138|5166|5295|5319|5468|5588|6347|6532|6622|6935|8013|8835|8850|9021|9314|9353|9365|10365|10580|27244|28999|55022|64397|120892|196883|245972|255738	AGTR1|AGTR2|AQP1|AQP9|CASQ2|CAV1|CAV2|CYBB|EDN1|EGR1|GAB1|GHR|GNG11|GPD1|GPER1|NR4A1|IL1B|IL6|NTRK2|PDE2A|PDK4|PIK3R1|PLA2G1B|PPARG|PRKCQ|CCL2|SLC6A4|SNCA|ZEB1|NR4A3|SOCS2|KAT2B|SOCS3|KLF4|SLIT2|KL|KLF2|SORBS1|SESN1|KLF15|PID1|ZNF106|LRRK2|ADCY4|ATP6V0D2|PCSK9
GO:0016202	0.00122058	0.99957	16	117	regulation of striated muscle tissue development	BP	0.0278504	650|1906|2247|2263|2627|2697|3084|5950|6909|6910|7048|7049|23493|57158|64321|89780	BMP2|EDN1|FGF2|FGFR2|GATA6|GJA1|NRG1|RBP4|TBX2|TBX5|TGFBR2|TGFBR3|HEY2|JPH2|SOX17|WNT3A
GO:1901863	0.00122401	0.999673	11	64	positive regulation of muscle tissue development	BP	0.0278876	1906|2247|2263|2627|3084|6909|6910|7049|23493|64321|89780	EDN1|FGF2|FGFR2|GATA6|NRG1|TBX2|TBX5|TGFBR3|HEY2|SOX17|WNT3A
GO:0001802	0.00124094	1	2	2	type III hypersensitivity	BP	0.028115	695|2207	BTK|FCER1G
GO:0001803	0.00124094	1	2	2	regulation of type III hypersensitivity	BP	0.028115	695|2207	BTK|FCER1G
GO:0001805	0.00124094	1	2	2	positive regulation of type III hypersensitivity	BP	0.028115	695|2207	BTK|FCER1G
GO:0048754	0.00124125	0.999516	19	148	branching morphogenesis of an epithelial tube	BP	0.028115	186|650|1906|2022|2247|2263|2294|2719|3202|4855|6926|6943|7048|9353|54922|64399|79633|255743|340419	AGTR2|BMP2|EDN1|ENG|FGF2|FGFR2|FOXF1|GPC3|HOXA5|NOTCH4|TBX3|TCF21|TGFBR2|SLIT2|RASIP1|HHIP|FAT4|NPNT|RSPO2
GO:0048639	0.00124339	0.999501	20	159	positive regulation of developmental growth	BP	0.0281223	32|627|659|1906|2247|2263|2627|2690|3084|3142|6387|6909|6910|7048|7049|9037|9254|23493|51393|89780	ACACB|BDNF|BMPR2|EDN1|FGF2|FGFR2|GATA6|GHR|NRG1|HLX|CXCL12|TBX2|TBX5|TGFBR2|TGFBR3|SEMA5A|CACNA2D2|HEY2|TRPV2|WNT3A
GO:0060485	0.00125238	0.999427	26	238	mesenchyme development	BP	0.028267	94|650|659|1601|1906|1910|2022|2078|2263|2294|3084|3202|4222|6909|6910|6943|7048|7049|9839|23493|28984|55273|89780|90102|152007|359845	ACVRL1|BMP2|BMPR2|DAB2|EDN1|EDNRB|ENG|ERG|FGFR2|FOXF1|NRG1|HOXA5|MEOX1|TBX2|TBX5|TCF21|TGFBR2|TGFBR3|ZEB2|HEY2|RGCC|TMEM100|WNT3A|PHLDB2|GLIPR2|RFLNB
GO:0036005	0.00125526	0.999918	4	10	response to macrophage colony-stimulating factor	BP	0.028267	5138|5153|6347|81501	PDE2A|PDE1B|CCL2|DCSTAMP
GO:0036006	0.00125526	0.999918	4	10	cellular response to macrophage colony-stimulating factor stimulus	BP	0.028267	5138|5153|6347|81501	PDE2A|PDE1B|CCL2|DCSTAMP
GO:1903555	0.00126627	0.999589	14	104	regulation of tumor necrosis factor superfamily cytokine production	BP	0.0284683	284|947|948|1536|2207|2621|3133|5196|5295|6347|6693|7099|7128|7538	ANGPT1|CD34|CD36|CYBB|FCER1G|GAS6|HLA-E|PF4|PIK3R1|CCL2|SPN|TLR4|TNFAIP3|ZFP36
GO:0001867	0.00126787	0.999917	4	10	complement activation, lectin pathway	BP	0.0284683	2|710|2219|8547	A2M|SERPING1|FCN1|FCN3
GO:0045913	0.00128521	0.999654	11	65	positive regulation of carbohydrate metabolic process	BP	0.0288159	2819|2852|5028|5155|5581|5745|6622|8850|10580|51744|114898	GPD1|GPER1|P2RY1|PDGFB|PRKCE|PTH1R|SNCA|KAT2B|SORBS1|CD244|C1QTNF2
GO:0010959	0.0013037	0.999348	32	323	regulation of metal ion transport	BP	0.0291882	154|477|482|845|857|1318|2040|2273|2697|2852|4638|5023|5155|5319|5348|5581|6330|6347|6387|6622|6769|7402|7466|7881|9002|51393|53826|57158|79026|84959|255738|283518	ADRB2|ATP1A2|ATP1B2|CASQ2|CAV1|SLC31A2|STOM|FHL1|GJA1|GPER1|MYLK|P2RX1|PDGFB|PLA2G1B|FXYD1|PRKCE|SCN4B|CCL2|CXCL12|SNCA|STAC|UTRN|WFS1|KCNAB1|F2RL3|TRPV2|FXYD6|JPH2|AHNAK|UBASH3B|PCSK9|KCNRG
GO:0043270	0.00130759	0.999421	24	222	positive regulation of ion transport	BP	0.0292329	482|857|1906|2273|2852|3553|4638|5023|5028|5155|5243|5319|5348|6330|6347|6387|6532|6622|7466|9002|23237|51393|57158|85358	ATP1B2|CAV1|EDN1|FHL1|GPER1|IL1B|MYLK|P2RX1|P2RY1|PDGFB|ABCB1|PLA2G1B|FXYD1|SCN4B|CCL2|CXCL12|SLC6A4|SNCA|WFS1|F2RL3|ARC|TRPV2|JPH2|SHANK3
GO:0002790	0.00131077	0.999257	46	520	peptide secretion	BP	0.0292619	186|284|322|408|947|948|1268|1906|2219|2268|2615|2621|2697|2702|2852|3133|3553|3569|4023|5319|5581|5734|5950|6283|6711|7099|8425|8622|8862|9173|9254|11069|23705|25924|26253|27063|28984|51092|51311|51744|58484|80223|90865|283849|338442|338557	AGTR2|ANGPT1|APBB1|ARRB1|CD34|CD36|CNR1|EDN1|FCN1|FGR|LRRC32|GAS6|GJA1|GJA5|GPER1|HLA-E|IL1B|IL6|LPL|PLA2G1B|PRKCE|PTGER4|RBP4|S100A12|SPTBN1|TLR4|LTBP4|PDE8B|APLN|IL1RL1|CACNA2D2|RAPGEF4|CADM1|MYRIP|CLEC4E|ANKRD1|RGCC|SIDT2|TLR8|CD244|NLRC4|RAB11FIP1|IL33|EXOC3L1|HCAR2|FFAR4
GO:0046635	0.00132565	0.9997	9	50	positive regulation of alpha-beta T cell activation	BP	0.0295516	3071|3133|3142|3569|5588|7048|7704|9308|51744	NCKAP1L|HLA-E|HLX|IL6|PRKCQ|TGFBR2|ZBTB16|CD83|CD244
GO:0015711	0.00135591	0.999257	41	444	organic anion transport	BP	0.0301826	32|186|341|358|366|477|761|762|948|1636|1906|2352|2697|3039|3040|3043|3553|3949|4915|5243|5319|5320|5322|5468|6505|6556|6578|6622|9056|9120|9619|11309|50487|56606|57515|84879|114789|123264|255189|353189|388121	ACACB|AGTR2|APOC1|AQP1|AQP9|ATP1A2|CA3|CA4|CD36|ACE|EDN1|FOLR3|GJA1|HBA1|HBA2|HBB|IL1B|LDLR|NTRK2|ABCB1|PLA2G1B|PLA2G2A|PLA2G5|PPARG|SLC1A1|SLC11A1|SLCO2A1|SNCA|SLC7A7|SLC16A6|ABCG1|SLCO2B1|PLA2G3|SLC2A9|SERINC1|MFSD2A|SLC25A25|SLC51B|PLA2G4F|SLCO4C1|TNFAIP8L3
GO:0030308	0.00139134	0.99945	19	158	negative regulation of cell growth	BP	0.0309269	94|186|322|659|1410|2203|2273|2697|3373|4881|5468|6586|9037|9353|56920|58189|64321|81501|89780	ACVRL1|AGTR2|APBB1|BMPR2|CRYAB|FBP1|FHL1|GJA1|HYAL1|NPR1|PPARG|SLIT3|SEMA5A|SLIT2|SEMA3G|WFDC1|SOX17|DCSTAMP|WNT3A
GO:0051130	0.0013984	0.999059	91	1158	positive regulation of cellular component organization	BP	0.0310393	154|246|284|322|408|627|659|857|948|1073|1268|1361|1440|1490|1601|1634|1906|2207|2621|2624|2719|2823|2852|3055|3071|3084|3373|3553|3569|4915|4921|5155|5168|5295|5468|5581|5588|5789|5806|6092|6347|6369|6387|6401|6441|6556|6622|6711|6886|7010|7099|9037|9353|9535|9638|9647|9839|10174|10268|10316|10580|10763|11076|11346|22885|22899|23645|23767|25802|27063|28984|30846|51393|54674|57580|65009|79625|815…	ADRB2|ALOX15|ANGPT1|APBB1|ARRB1|BDNF|BMPR2|CAV1|CD36|CFL2|CNR1|CPB2|CSF3|CTGF|DAB2|DCN|EDN1|FCER1G|GAS6|GATA2|GPC3|GPM6A|GPER1|HCK|NCKAP1L|NRG1|HYAL1|IL1B|IL6|NTRK2|DDR2|PDGFB|ENPP2|PIK3R1|PPARG|PRKCE|PRKCQ|PTPRD|PTX3|ROBO2|CCL2|CCL24|CXCL12|SELE|SFTPD|SLC11A1|SNCA|SPTBN1|TAL1|TEK|TLR4|SEMA5A|SLIT2|GMFG|FEZ1|PPM1F|ZEB2|SORBS3|RAMP3|NMUR1|SORBS1|NES|TPPP|SYNPO|ABLIM3|ARHGEF15|PPP1R15A|FLRT3|LMOD1|…
GO:0051051	0.00141192	0.999225	41	453	negative regulation of transport	BP	0.0312945	186|284|341|477|554|845|857|947|948|1268|1410|1906|2294|2615|2621|2824|3084|3553|3569|4129|5028|5138|5581|5593|5734|6425|6622|7881|8622|11142|28984|29091|51311|55022|80223|90865|120892|146722|255738|283518|338557	AGTR2|ANGPT1|APOC1|ATP1A2|AVPR2|CASQ2|CAV1|CD34|CD36|CNR1|CRYAB|EDN1|FOXF1|LRRC32|GAS6|GPM6B|NRG1|IL1B|IL6|MAOB|P2RY1|PDE2A|PRKCE|PRKG2|PTGER4|SFRP5|SNCA|KCNAB1|PDE8B|PKIG|RGCC|STXBP6|TLR8|PID1|RAB11FIP1|IL33|LRRK2|CD300LF|PCSK9|KCNRG|FFAR4
GO:0048638	0.00141968	0.999304	30	285	regulation of developmental growth	BP	0.0314216	32|153|154|627|659|1808|1906|2247|2263|2627|2690|2697|3084|3142|5950|6387|6532|6909|6910|7048|7049|9037|9254|23493|26524|51393|56920|80014|85407|89780	ACACB|ADRB1|ADRB2|BDNF|BMPR2|DPYSL2|EDN1|FGF2|FGFR2|GATA6|GHR|GJA1|NRG1|HLX|RBP4|CXCL12|SLC6A4|TBX2|TBX5|TGFBR2|TGFBR3|SEMA5A|CACNA2D2|HEY2|LATS2|TRPV2|SEMA3G|WWC2|NKD1|WNT3A
GO:0051896	0.00142599	0.999489	16	125	regulation of protein kinase B signaling	BP	0.0315161	284|1440|1839|2159|2621|2852|3084|3569|4915|6237|6425|7010|9037|9314|23533|388121	ANGPT1|CSF3|HBEGF|F10|GAS6|GPER1|NRG1|IL6|NTRK2|RRAS|SFRP5|TEK|SEMA5A|KLF4|PIK3R5|TNFAIP8L3
GO:0044062	0.00145574	0.999791	6	25	regulation of excretion	BP	0.0321279	185|186|554|1906|1910|4881	AGTR1|AGTR2|AVPR2|EDN1|EDNRB|NPR1
GO:0060562	0.00147216	0.999259	32	309	epithelial tube morphogenesis	BP	0.0324442	94|186|650|1906|2022|2247|2263|2294|2719|3202|4855|6909|6926|6943|7048|9353|9839|10395|25928|54345|54922|64321|64399|65009|79192|79633|89780|90627|144165|200894|255743|340419	ACVRL1|AGTR2|BMP2|EDN1|ENG|FGF2|FGFR2|FOXF1|GPC3|HOXA5|NOTCH4|TBX2|TBX3|TCF21|TGFBR2|SLIT2|ZEB2|DLC1|SOSTDC1|SOX18|RASIP1|SOX17|HHIP|NDRG4|IRX1|FAT4|WNT3A|STARD13|PRICKLE1|ARL13B|NPNT|RSPO2
GO:0010878	0.00147552	0.999846	5	15	cholesterol storage	BP	0.0324719	948|4023|4481|5468|9619	CD36|LPL|MSR1|PPARG|ABCG1
GO:0002819	0.00148232	0.999465	16	130	regulation of adaptive immune response	BP	0.032508	177|246|695|1178|2207|3133|3142|3553|3569|3575|5588|6556|6693|7128|9173|90865	AGER|ALOX15|BTK|CLC|FCER1G|HLA-E|HLX|IL1B|IL6|IL7R|PRKCQ|SLC11A1|SPN|TNFAIP3|IL1RL1|IL33
GO:0030900	0.00148323	0.999219	36	361	forebrain development	BP	0.032508	306|358|554|597|650|2263|2624|3084|3340|3400|4628|4900|4915|5592|6092|6387|6532|6751|6867|6926|7832|8013|9037|9353|9839|10395|23287|26468|55118|79633|84879|85358|85458|89780|120892|200894	ANXA3|AQP1|AVPR2|BCL2A1|BMP2|FGFR2|GATA2|NRG1|NDST1|ID4|MYH10|NRGN|NTRK2|PRKG1|ROBO2|CXCL12|SLC6A4|SSTR1|TACC1|TBX3|BTG2|NR4A3|SEMA5A|SLIT2|ZEB2|DLC1|AGTPBP1|LHX6|CRTAC1|FAT4|MFSD2A|SHANK3|DIXDC1|WNT3A|LRRK2|ARL13B
GO:1901861	0.00148346	0.999467	16	119	regulation of muscle tissue development	BP	0.032508	650|1906|2247|2263|2627|2697|3084|5950|6909|6910|7048|7049|23493|57158|64321|89780	BMP2|EDN1|FGF2|FGFR2|GATA6|GJA1|NRG1|RBP4|TBX2|TBX5|TGFBR2|TGFBR3|HEY2|JPH2|SOX17|WNT3A
GO:0001820	0.0014915	0.999894	4	11	serotonin secretion	BP	0.0326382	2207|4129|5023|6532	FCER1G|MAOB|P2RX1|SLC6A4
GO:0071222	0.00150704	0.999417	18	151	cellular response to lipopolysaccharide	BP	0.0329316	948|1440|1511|1524|1910|3055|3553|3569|4360|5581|6347|7099|7128|7538|9450|23328|27063|57088	CD36|CSF3|CTSG|CX3CR1|EDNRB|HCK|IL1B|IL6|MRC1|PRKCE|CCL2|TLR4|TNFAIP3|ZFP36|LY86|SASH1|ANKRD1|PLSCR4
GO:0050866	0.00152226	0.999393	19	163	negative regulation of cell activation	BP	0.0332173	695|1268|2294|2615|2852|3142|4332|5155|5592|6441|6693|7056|7128|7356|7940|8654|11326|84959|146722	BTK|CNR1|FOXF1|LRRC32|GPER1|HLX|MNDA|PDGFB|PRKG1|SFTPD|SPN|THBD|TNFAIP3|SCGB1A1|LST1|PDE5A|VSIG4|UBASH3B|CD300LF
GO:0031348	0.00152944	0.999408	18	151	negative regulation of defense response	BP	0.0333273	2|177|710|1524|2294|2852|3133|5468|5734|5740|6693|7010|7128|9021|9314|10203|58189|338557	A2M|AGER|SERPING1|CX3CR1|FOXF1|GPER1|HLA-E|PPARG|PTGER4|PTGIS|SPN|TEK|TNFAIP3|SOCS3|KLF4|CALCRL|WFDC1|FFAR4
GO:1902667	0.00153999	0.999783	6	21	regulation of axon guidance	BP	0.0335098	659|5800|6387|9037|9353|89780	BMPR2|PTPRO|CXCL12|SEMA5A|SLIT2|WNT3A
GO:0033674	0.00155854	0.999108	46	511	positive regulation of kinase activity	BP	0.0338661	154|177|284|408|650|728|894|1326|1636|1906|2013|2247|2268|2357|2549|2621|2690|3071|3084|3491|3553|4616|4921|5155|5319|6283|6556|6622|7010|7048|7099|8322|8654|9770|9839|23328|23533|28984|51196|89780|114898|120892|196883|285016|388121|653361	ADRB2|AGER|ANGPT1|ARRB1|BMP2|C5AR1|CCND2|MAP3K8|ACE|EDN1|EMP2|FGF2|FGR|FPR1|GAB1|GAS6|GHR|NCKAP1L|NRG1|CYR61|IL1B|GADD45B|DDR2|PDGFB|PLA2G1B|S100A12|SLC11A1|SNCA|TEK|TGFBR2|TLR4|FZD4|PDE5A|RASSF2|ZEB2|SASH1|PIK3R5|RGCC|PLCE1|WNT3A|C1QTNF2|LRRK2|ADCY4|ALKAL2|TNFAIP8L3|NCF1
GO:0002822	0.00157405	0.999451	15	119	regulation of adaptive immune response based on somatic recombination of immune receptors built from immunoglobulin superfamily domains	BP	0.0341222	177|695|1178|2207|3133|3142|3553|3569|3575|5588|6556|6693|7128|9173|90865	AGER|BTK|CLC|FCER1G|HLA-E|HLX|IL1B|IL6|IL7R|PRKCQ|SLC11A1|SPN|TNFAIP3|IL1RL1|IL33
GO:0003231	0.00157618	0.999431	16	117	cardiac ventricle development	BP	0.0341222	659|2022|2263|2294|2702|3084|3491|4091|6910|6926|7048|7049|7134|23493|57493|140706	BMPR2|ENG|FGFR2|FOXF1|GJA5|NRG1|CYR61|SMAD6|TBX5|TBX3|TGFBR2|TGFBR3|TNNC1|HEY2|HEG1|CCM2L
GO:0001503	0.00157752	0.999166	36	373	ossification	BP	0.0341222	154|246|650|659|847|1305|1490|1901|1959|2263|2662|2719|2824|3400|3491|3569|3727|4091|4921|5251|5734|5745|7010|7123|7704|8994|9365|9770|79633|89780|91851|133522|255743|285313|340419|359845	ADRB2|ALOX15|BMP2|BMPR2|CAT|COL13A1|CTGF|S1PR1|EGR2|FGFR2|GDF10|GPC3|GPM6B|ID4|CYR61|IL6|JUND|SMAD6|DDR2|PHEX|PTGER4|PTH1R|TEK|CLEC3B|ZBTB16|LIMD1|KL|RASSF2|FAT4|WNT3A|CHRDL1|PPARGC1B|NPNT|IGSF10|RSPO2|RFLNB
GO:0001657	0.00157914	0.999477	14	97	ureteric bud development	BP	0.0341222	186|650|847|2247|2263|2719|4091|4093|6092|6943|9353|79633|168667|255743	AGTR2|BMP2|CAT|FGF2|FGFR2|GPC3|SMAD6|SMAD9|ROBO2|TCF21|SLIT2|FAT4|BMPER|NPNT
GO:0060322	0.00158145	0.999022	61	709	head development	BP	0.0341245	186|306|358|554|597|650|659|728|1808|1901|1959|2009|2263|2624|3084|3340|3400|3777|4093|4129|4628|4900|4915|5414|5592|6092|6237|6387|6414|6532|6751|6867|6926|7048|7122|7832|7881|8013|8322|8516|9037|9353|9839|10395|10763|23287|23767|26468|55118|55130|57447|57477|79633|80031|84879|85358|85458|89780|120892|200894|266727	AGTR2|ANXA3|AQP1|AVPR2|BCL2A1|BMP2|BMPR2|C5AR1|DPYSL2|S1PR1|EGR2|EML1|FGFR2|GATA2|NRG1|NDST1|ID4|KCNK3|SMAD9|MAOB|MYH10|NRGN|NTRK2|SEPT4|PRKG1|ROBO2|RRAS|CXCL12|SELENOP|SLC6A4|SSTR1|TACC1|TBX3|TGFBR2|CLDN5|BTG2|KCNAB1|NR4A3|FZD4|ITGA8|SEMA5A|SLIT2|ZEB2|DLC1|NES|AGTPBP1|FLRT3|LHX6|CRTAC1|ARMC4|NDRG2|SHROOM4|FAT4|SEMA6D|MFSD2A|SHANK3|DIXDC1|WNT3A|LRRK2|ARL13B|MDGA1
GO:0007204	0.00158906	0.999247	27	264	positive regulation of cytosolic calcium ion concentration	BP	0.034241	185|477|728|845|857|948|1043|1901|1906|1910|2247|2357|2358|2624|2697|2828|2852|5028|5319|5581|5745|6622|8698|9002|51196|57158|84959	AGTR1|ATP1A2|C5AR1|CASQ2|CAV1|CD36|CD52|S1PR1|EDN1|EDNRB|FGF2|FPR1|FPR2|GATA2|GJA1|GPR4|GPER1|P2RY1|PLA2G1B|PRKCE|PTH1R|SNCA|S1PR4|F2RL3|PLCE1|JPH2|UBASH3B
GO:0033673	0.0015993	0.999243	27	257	negative regulation of kinase activity	BP	0.0344139	104|857|1030|1634|1843|1850|2167|3553|3569|4616|7128|8835|8850|9021|9467|9535|9647|11142|23767|26524|55924|57580|64101|80243|84959|94030|389119	ADARB1|CAV1|CDKN2B|DCN|DUSP1|DUSP8|FABP4|IL1B|IL6|GADD45B|TNFAIP3|SOCS2|KAT2B|SOCS3|SH3BP5|GMFG|PPM1F|PKIG|FLRT3|LATS2|FAM212B|PREX1|LRRC4|PREX2|UBASH3B|LRRC4B|FAM212A
GO:0060044	0.00161143	0.999887	4	10	negative regulation of cardiac muscle cell proliferation	BP	0.0346267	2697|5950|6910|7048	GJA1|RBP4|TBX5|TGFBR2
GO:0003281	0.00162188	0.999552	11	63	ventricular septum development	BP	0.0348029	659|2263|2702|3491|4091|6910|6926|7048|7049|23493|57493	BMPR2|FGFR2|GJA5|CYR61|SMAD6|TBX5|TBX3|TGFBR2|TGFBR3|HEY2|HEG1
GO:0030856	0.00163332	0.999407	16	123	regulation of epithelial cell differentiation	BP	0.0349564	94|857|1003|3553|4855|6926|6935|7122|7538|9839|23493|23764|55273|79633|81575|84913	ACVRL1|CAV1|CDH5|IL1B|NOTCH4|TBX3|ZEB1|CLDN5|ZFP36|ZEB2|HEY2|MAFF|TMEM100|FAT4|APOLD1|ATOH8
GO:0051385	0.00163564	0.999708	7	32	response to mineralocorticoid	BP	0.0349564	1490|1536|1906|2353|2354|2852|4129	CTGF|CYBB|EDN1|FOS|FOSB|GPER1|MAOB
GO:0048846	0.00163895	0.999767	6	21	axon extension involved in axon guidance	BP	0.0349564	659|6387|6586|9037|9353|89780	BMPR2|CXCL12|SLIT3|SEMA5A|SLIT2|WNT3A
GO:1902284	0.00163895	0.999767	6	21	neuron projection extension involved in neuron projection guidance	BP	0.0349564	659|6387|6586|9037|9353|89780	BMPR2|CXCL12|SLIT3|SEMA5A|SLIT2|WNT3A
GO:0045603	0.00164031	0.999821	5	16	positive regulation of endothelial cell differentiation	BP	0.0349564	94|1003|7122|55273|84913	ACVRL1|CDH5|CLDN5|TMEM100|ATOH8
GO:0044344	0.00166779	0.99937	17	135	cellular response to fibroblast growth factor stimulus	BP	0.0354932	1490|1960|2247|2263|2264|3164|3340|3373|3730|6347|6622|7538|9365|23767|64399|79633|152831	CTGF|EGR3|FGF2|FGFR2|FGFR4|NR4A1|NDST1|HYAL1|ANOS1|CCL2|SNCA|ZFP36|KL|FLRT3|HHIP|FAT4|KLB
GO:0051056	0.00171039	0.999131	32	300	regulation of small GTPase mediated signal transduction	BP	0.0363498	2|395|408|2203|2828|3084|5923|9002|9353|9411|9459|9754|9912|10395|22899|26084|51196|57381|57514|57580|64411|80243|83478|90627|93663|115727|116984|152273|286205|345930|389337|440073	A2M|ARHGAP6|ARRB1|FBP1|GPR4|NRG1|RASGRF1|F2RL3|SLIT2|ARHGAP29|ARHGEF6|STARD8|ARHGAP44|DLC1|ARHGEF15|ARHGEF26|PLCE1|RHOJ|ARHGAP31|PREX1|ARAP3|PREX2|ARHGAP24|STARD13|ARHGAP18|RASGRP4|ARAP2|FGD5|SCAI|ECT2L|ARHGEF37|IQSEC3
GO:0036148	0.00174561	0.999804	5	17	phosphatidylglycerol acyl-chain remodeling	BP	0.0370477	5319|5320|5322|50487|255189	PLA2G1B|PLA2G2A|PLA2G5|PLA2G3|PLA2G4F
GO:0072163	0.00176898	0.999406	14	98	mesonephric epithelium development	BP	0.037441	186|650|847|2247|2263|2719|4091|4093|6092|6943|9353|79633|168667|255743	AGTR2|BMP2|CAT|FGF2|FGFR2|GPC3|SMAD6|SMAD9|ROBO2|TCF21|SLIT2|FAT4|BMPER|NPNT
GO:0072164	0.00176898	0.999406	14	98	mesonephric tubule development	BP	0.037441	186|650|847|2247|2263|2719|4091|4093|6092|6943|9353|79633|168667|255743	AGTR2|BMP2|CAT|FGF2|FGFR2|GPC3|SMAD6|SMAD9|ROBO2|TCF21|SLIT2|FAT4|BMPER|NPNT
GO:0045861	0.0017736	0.999126	29	315	negative regulation of proteolysis	BP	0.0374876	2|358|408|710|1285|1361|1473|2621|2719|3569|3730|5627|6590|6622|7078|8434|9314|9806|27074|27151|51232|58189|58484|80760|114769|120892|128488|221476|653145	A2M|AQP1|ARRB1|SERPING1|COL4A3|CPB2|CST5|GAS6|GPC3|IL6|ANOS1|PROS1|SLPI|SNCA|TIMP3|RECK|KLF4|SPOCK2|LAMP3|CPAMD8|CRIM1|WFDC1|NLRC4|ITIH5|CARD16|LRRK2|WFDC12|PI16|ANXA8
GO:0030278	0.0017791	0.999243	21	184	regulation of ossification	BP	0.0375526	154|650|659|1901|1959|2263|2662|2824|3400|3491|3569|3727|4091|4921|5734|7704|8994|9365|9770|255743|359845	ADRB2|BMP2|BMPR2|S1PR1|EGR2|FGFR2|GDF10|GPM6B|ID4|CYR61|IL6|JUND|SMAD6|DDR2|PTGER4|ZBTB16|LIMD1|KL|RASSF2|NPNT|RFLNB
GO:0072223	0.00181045	0.999945	3	5	metanephric glomerular mesangium development	BP	0.0381623	947|1958|5155	CD34|EGR1|PDGFB
GO:0071706	0.00182026	0.999383	14	108	tumor necrosis factor superfamily cytokine production	BP	0.0383169	284|947|948|1536|2207|2621|3133|5196|5295|6347|6693|7099|7128|7538	ANGPT1|CD34|CD36|CYBB|FCER1G|GAS6|HLA-E|PF4|PIK3R1|CCL2|SPN|TLR4|TNFAIP3|ZFP36
GO:0032663	0.0018273	0.999566	9	50	regulation of interleukin-2 production	BP	0.038413	947|3553|5588|6441|6711|7128|7538|9308|11326	CD34|IL1B|PRKCQ|SFTPD|SPTBN1|TNFAIP3|ZFP36|CD83|VSIG4
GO:0060317	0.00183072	0.999668	7	31	cardiac epithelial to mesenchymal transition	BP	0.0384327	650|2022|2078|7048|7049|23493|55273	BMP2|ENG|ERG|TGFBR2|TGFBR3|HEY2|TMEM100
GO:0022898	0.00183422	0.999199	22	197	regulation of transmembrane transporter activity	BP	0.038454	477|482|845|857|2040|2273|2697|5243|5348|5581|5923|6330|6769|7402|7881|23237|53826|57158|79026|85358|255738|283518	ATP1A2|ATP1B2|CASQ2|CAV1|STOM|FHL1|GJA1|ABCB1|FXYD1|PRKCE|RASGRF1|SCN4B|STAC|UTRN|KCNAB1|ARC|FXYD6|JPH2|AHNAK|SHANK3|PCSK9|KCNRG
GO:0032060	0.00184981	0.999866	4	10	bleb assembly	BP	0.0387285	2012|2013|4638|5376	EMP1|EMP2|MYLK|PMP22
GO:0048545	0.00186937	0.999001	36	383	response to steroid hormone	BP	0.0390853	21|186|306|358|477|590|687|857|1036|1490|1536|1601|1843|1906|2022|2353|2354|2852|3164|3569|4129|5468|6258|6347|6586|6943|7048|7356|7538|8013|9353|10266|25959|57658|133522|167465	ABCA3|AGTR2|ANXA3|AQP1|ATP1A2|BCHE|KLF9|CAV1|CDO1|CTGF|CYBB|DAB2|DUSP1|EDN1|ENG|FOS|FOSB|GPER1|NR4A1|IL6|MAOB|PPARG|RXRG|CCL2|SLIT3|TCF21|TGFBR2|SCGB1A1|ZFP36|NR4A3|SLIT2|RAMP2|KANK2|CALCOCO1|PPARGC1B|ZNF366
GO:2000826	0.00189764	0.999652	7	32	regulation of heart morphogenesis	BP	0.0396228	650|659|2022|6909|6910|7048|89780	BMP2|BMPR2|ENG|TBX2|TBX5|TGFBR2|WNT3A
GO:0007264	0.00190604	0.998899	46	490	small GTPase mediated signal transduction	BP	0.0397446	2|185|395|408|1012|2203|2247|2828|3084|5923|6237|9002|9046|9353|9411|9459|9732|9754|9912|10044|10395|11069|22808|22899|26084|51196|53358|57381|57514|57580|64411|80243|83478|90627|93663|115727|116984|120892|139818|152273|153020|200894|286205|345930|389337|440073	A2M|AGTR1|ARHGAP6|ARRB1|CDH13|FBP1|FGF2|GPR4|NRG1|RASGRF1|RRAS|F2RL3|DOK2|SLIT2|ARHGAP29|ARHGEF6|DOCK4|STARD8|ARHGAP44|SH2D3C|DLC1|RAPGEF4|MRAS|ARHGEF15|ARHGEF26|PLCE1|SHC3|RHOJ|ARHGAP31|PREX1|ARAP3|PREX2|ARHGAP24|STARD13|ARHGAP18|RASGRP4|ARAP2|LRRK2|DOCK11|FGD5|RASGEF1B|ARL13B|SCAI|ECT2L|ARHGEF37|IQSEC3
GO:0046621	0.00191729	0.999713	6	23	negative regulation of organ growth	BP	0.0399255	2697|5950|6532|6910|7048|80014	GJA1|RBP4|SLC6A4|TBX5|TGFBR2|WWC2
GO:0072224	0.00193551	0.99978	5	16	metanephric glomerulus development	BP	0.0402508	186|947|1958|5155|6943	AGTR2|CD34|EGR1|PDGFB|TCF21
GO:2000279	0.00198101	0.999634	7	32	negative regulation of DNA biosynthetic process	BP	0.0411417	94|659|1602|1843|2697|5468|27063	ACVRL1|BMPR2|DACH1|DUSP1|GJA1|PPARG|ANKRD1
GO:0044060	0.00199368	0.99957	8	43	regulation of endocrine process	BP	0.0413494	185|186|2702|3553|8862|56729|80223|338442	AGTR1|AGTR2|GJA5|IL1B|APLN|RETN|RAB11FIP1|HCAR2
GO:0008154	0.00200818	0.999137	21	184	actin polymerization or depolymerization	BP	0.0415947	246|395|1073|1440|3055|3071|5581|6369|6387|6711|7111|9037|9353|9535|10810|25802|57580|91663|93663|130271|375307	ALOX15|ARHGAP6|CFL2|CSF3|HCK|NCKAP1L|PRKCE|CCL24|CXCL12|SPTBN1|TMOD1|SEMA5A|SLIT2|GMFG|WASF3|LMOD1|PREX1|MYADM|ARHGAP18|PLEKHH2|CATIP
GO:0060413	0.00201629	0.999769	5	16	atrial septum morphogenesis	BP	0.0417068	659|2702|3491|6910|23493	BMPR2|GJA5|CYR61|TBX5|HEY2
GO:0045860	0.0020304	0.998845	43	478	positive regulation of protein kinase activity	BP	0.0419426	154|177|284|408|650|728|894|1326|1636|1906|2013|2247|2357|2549|2621|2690|3071|3084|3491|3553|4616|4921|5155|5319|6283|6556|6622|7048|7099|8322|8654|9770|9839|23328|23533|28984|51196|89780|114898|120892|196883|285016|653361	ADRB2|AGER|ANGPT1|ARRB1|BMP2|C5AR1|CCND2|MAP3K8|ACE|EDN1|EMP2|FGF2|FPR1|GAB1|GAS6|GHR|NCKAP1L|NRG1|CYR61|IL1B|GADD45B|DDR2|PDGFB|PLA2G1B|S100A12|SLC11A1|SNCA|TGFBR2|TLR4|FZD4|PDE5A|RASSF2|ZEB2|SASH1|PIK3R5|RGCC|PLCE1|WNT3A|C1QTNF2|LRRK2|ADCY4|ALKAL2|NCF1
GO:0048333	0.00203995	0.999621	7	32	mesodermal cell differentiation	BP	0.0420591	2263|2294|6886|8516|9314|64321|89780	FGFR2|FOXF1|TAL1|ITGA8|KLF4|SOX17|WNT3A
GO:1905209	0.00204146	0.999688	6	24	positive regulation of cardiocyte differentiation	BP	0.0420591	1906|2627|2852|3084|6910|89780	EDN1|GATA6|GPER1|NRG1|TBX5|WNT3A
GO:0043116	0.00205257	0.999846	4	10	negative regulation of vascular permeability	BP	0.0422317	284|5138|9353|10266	ANGPT1|PDE2A|SLIT2|RAMP2
GO:0070613	0.00205533	0.999366	12	84	regulation of protein processing	BP	0.0422324	2|710|728|729|730|732|1361|5199|5627|7123|58484|120892	A2M|SERPING1|C5AR1|C6|C7|C8B|CPB2|CFP|PROS1|CLEC3B|NLRC4|LRRK2
GO:0060841	0.00206377	0.999762	5	16	venous blood vessel development	BP	0.0423496	94|659|2022|2294|57493	ACVRL1|BMPR2|ENG|FOXF1|HEG1
GO:0006629	0.00207094	0.998562	100	1356	lipid metabolic process	BP	0.0423861	32|33|154|185|216|240|241|246|341|650|660|847|857|948|1268|1572|1593|1839|1906|1958|2167|2171|2247|2262|2263|2264|2268|2549|2627|2690|2719|2819|2852|3084|3491|3553|3949|3953|3988|4023|5023|5155|5166|5168|5295|5319|5320|5322|5334|5468|5581|5730|5740|5948|5950|6383|6622|7010|8013|8395|8613|8630|8706|9314|9365|9444|9619|10580|10630|10908|11000|22979|23533|27306|30815|50487|51196|55289|55711|55911|57…	ACACB|ACADL|ADRB2|AGTR1|ALDH1A1|ALOX5|ALOX5AP|ALOX15|APOC1|BMP2|BMX|CAT|CAV1|CD36|CNR1|CYP2F1|CYP27A1|HBEGF|EDN1|EGR1|FABP4|FABP5|FGF2|GPC5|FGFR2|FGFR4|FGR|GAB1|GATA6|GHR|GPC3|GPD1|GPER1|NRG1|CYR61|IL1B|LDLR|LEPR|LIPA|LPL|P2RX1|PDGFB|PDK4|ENPP2|PIK3R1|PLA2G1B|PLA2G2A|PLA2G5|PLCL1|PPARG|PRKCE|PTGDS|PTGIS|RBP2|RBP4|SDC2|SNCA|TEK|NR4A3|PIP5K1B|PLPP3|HSD17B6|B3GALNT1|KLF4|KL|QKI|ABCG1|SORBS1|PDPN|PNP…
GO:0050918	0.00207102	0.999495	9	54	positive chemotaxis	BP	0.0423861	177|284|1012|1901|2247|2277|5155|6387|9037	AGER|ANGPT1|CDH13|S1PR1|FGF2|VEGFD|PDGFB|CXCL12|SEMA5A
GO:0019722	0.00208547	0.999169	18	151	calcium-mediated signaling	BP	0.0426257	185|477|683|695|845|1012|1827|1906|3084|5737|6401|6403|10316|29995|51196|55273|57158|120892	AGTR1|ATP1A2|BST1|BTK|CASQ2|CDH13|RCAN1|EDN1|NRG1|PTGFR|SELE|SELP|NMUR1|LMCD1|PLCE1|TMEM100|JPH2|LRRK2
GO:0007420	0.00212034	0.998688	58	675	brain development	BP	0.0432812	186|306|358|554|597|650|659|728|1808|1901|1959|2009|2263|2624|3084|3340|3400|3777|4093|4129|4628|4900|4915|5414|5592|6092|6387|6414|6532|6751|6867|6926|7048|7832|7881|8013|8322|8516|9037|9353|9839|10395|10763|23287|26468|55118|55130|57447|57477|79633|80031|84879|85358|85458|89780|120892|200894|266727	AGTR2|ANXA3|AQP1|AVPR2|BCL2A1|BMP2|BMPR2|C5AR1|DPYSL2|S1PR1|EGR2|EML1|FGFR2|GATA2|NRG1|NDST1|ID4|KCNK3|SMAD9|MAOB|MYH10|NRGN|NTRK2|SEPT4|PRKG1|ROBO2|CXCL12|SELENOP|SLC6A4|SSTR1|TACC1|TBX3|TGFBR2|BTG2|KCNAB1|NR4A3|FZD4|ITGA8|SEMA5A|SLIT2|ZEB2|DLC1|NES|AGTPBP1|LHX6|CRTAC1|ARMC4|NDRG2|SHROOM4|FAT4|SEMA6D|MFSD2A|SHANK3|DIXDC1|WNT3A|LRRK2|ARL13B|MDGA1
GO:0007368	0.00212873	0.999236	15	114	determination of left/right symmetry	BP	0.0433953	2022|2294|6909|6926|7048|27019|54345|55130|64321|64446|65009|89780|92749|200894|220136	ENG|FOXF1|TBX2|TBX3|TGFBR2|DNAI1|SOX18|ARMC4|SOX17|DNAI2|NDRG4|WNT3A|DRC1|ARL13B|CFAP53
GO:0060393	0.00213377	0.99943	10	60	regulation of pathway-restricted SMAD protein phosphorylation	BP	0.043441	94|650|659|1601|2022|2662|4091|7044|83891|168667	ACVRL1|BMP2|BMPR2|DAB2|ENG|GDF10|SMAD6|LEFTY2|SNX25|BMPER
GO:0051414	0.00213662	0.999931	3	5	response to cortisol	BP	0.0434418	687|6586|9353	KLF9|SLIT3|SLIT2
GO:0003222	0.00214121	0.999751	5	16	ventricular trabecula myocardium morphogenesis	BP	0.043478	2022|3084|23493|57493|140706	ENG|NRG1|HEY2|HEG1|CCM2L
GO:0070661	0.00215343	0.998971	26	270	leukocyte proliferation	BP	0.0436689	177|695|1178|1636|2615|3071|3133|3553|3569|3575|4332|4883|5588|6441|6556|6693|7048|7099|7128|7356|7940|8654|11326|51744|89780|90865	AGER|BTK|CLC|ACE|LRRC32|NCKAP1L|HLA-E|IL1B|IL6|IL7R|MNDA|NPR3|PRKCQ|SFTPD|SLC11A1|SPN|TGFBR2|TLR4|TNFAIP3|SCGB1A1|LST1|PDE5A|VSIG4|CD244|WNT3A|IL33
GO:0061081	0.00215912	0.99983	4	11	positive regulation of myeloid leukocyte cytokine production involved in immune response	BP	0.043727	948|2207|7099|8013	CD36|FCER1G|TLR4|NR4A3
GO:2001300	0.00216557	0.999917	3	6	lipoxin metabolic process	BP	0.0438004	240|241|246	ALOX5|ALOX5AP|ALOX15
GO:2000416	0.00217351	0.999917	3	6	regulation of eosinophil migration	BP	0.0439038	5734|6369|23604	PTGER4|CCL24|DAPK2
GO:0071216	0.00220113	0.999067	20	179	cellular response to biotic stimulus	BP	0.0443952	695|948|1440|1511|1524|1910|3055|3553|3569|4360|5581|6347|7099|7128|7466|7538|9450|23328|27063|57088	BTK|CD36|CSF3|CTSG|CX3CR1|EDNRB|HCK|IL1B|IL6|MRC1|PRKCE|CCL2|TLR4|TNFAIP3|WFS1|ZFP36|LY86|SASH1|ANKRD1|PLSCR4
GO:0010676	0.00220357	0.99946	9	51	positive regulation of cellular carbohydrate metabolic process	BP	0.0443952	2852|5028|5581|5745|6622|8850|10580|51744|114898	GPER1|P2RY1|PRKCE|PTH1R|SNCA|KAT2B|SORBS1|CD244|C1QTNF2
GO:0007188	0.0022202	0.999109	18	152	adenylate cyclase-modulating G-protein coupled receptor signaling pathway	BP	0.0446308	153|154|554|1268|1901|2357|2852|2869|4883|5028|5734|5739|5745|8698|10203|59350|196883|283383	ADRB1|ADRB2|AVPR2|CNR1|S1PR1|FPR1|GPER1|GRK5|NPR3|P2RY1|PTGER4|PTGIR|PTH1R|S1PR4|CALCRL|RXFP1|ADCY4|ADGRD1
GO:0012501	0.00222102	0.998377	135	1927	programmed cell death	BP	0.0446308	104|186|284|322|358|408|467|597|627|650|659|660|695|728|847|857|894|1178|1268|1271|1285|1410|1490|1601|1776|1843|1906|1910|1958|1960|2207|2263|2621|2627|2662|2697|2852|2869|3055|3071|3202|3491|3553|3569|3851|4091|4332|4616|4915|5023|5153|5166|5196|5295|5325|5414|5468|5551|5581|5588|5737|5740|6092|6347|6387|6425|6446|6586|6622|6688|6693|6910|6926|7010|7044|7048|7051|7078|7099|7128|7466|7538|7704|7…	ADARB1|AGTR2|ANGPT1|APBB1|AQP1|ARRB1|ATF3|BCL2A1|BDNF|BMP2|BMPR2|BMX|BTK|C5AR1|CAT|CAV1|CCND2|CLC|CNR1|CNTFR|COL4A3|CRYAB|CTGF|DAB2|DNASE1L3|DUSP1|EDN1|EDNRB|EGR1|EGR3|FCER1G|FGFR2|GAS6|GATA6|GDF10|GJA1|GPER1|GRK5|HCK|NCKAP1L|HOXA5|CYR61|IL1B|IL6|KRT4|SMAD6|MNDA|GADD45B|NTRK2|P2RX1|PDE1B|PDK4|PF4|PIK3R1|PLAGL1|SEPT4|PPARG|PRF1|PRKCE|PRKCQ|PTGFR|PTGIS|ROBO2|CCL2|CXCL12|SFRP5|SGK1|SLIT3|SNCA|SPI1|S…
GO:0048661	0.00224697	0.999345	11	72	positive regulation of smooth muscle cell proliferation	BP	0.0450937	1012|1839|1901|1906|2263|3569|5155|7048|8013|10203|56729	CDH13|HBEGF|S1PR1|EDN1|FGFR2|IL6|PDGFB|TGFBR2|NR4A3|CALCRL|RETN
GO:0030513	0.00227412	0.99957	7	32	positive regulation of BMP signaling pathway	BP	0.0455796	94|659|2022|2627|2719|3491|23090	ACVRL1|BMPR2|ENG|GATA6|GPC3|CYR61|ZNF423
GO:1903317	0.00228578	0.999286	12	85	regulation of protein maturation	BP	0.045754	2|710|728|729|730|732|1361|5199|5627|7123|58484|120892	A2M|SERPING1|C5AR1|C6|C7|C8B|CPB2|CFP|PROS1|CLEC3B|NLRC4|LRRK2
GO:0071772	0.00231795	0.999041	19	158	response to BMP	BP	0.0462783	94|650|659|1958|2022|2627|2662|2719|3491|4091|4093|7044|7049|23090|25928|55273|91851|140628|168667	ACVRL1|BMP2|BMPR2|EGR1|ENG|GATA6|GDF10|GPC3|CYR61|SMAD6|SMAD9|LEFTY2|TGFBR3|ZNF423|SOSTDC1|TMEM100|CHRDL1|GATA5|BMPER
GO:0071773	0.00231795	0.999041	19	158	cellular response to BMP stimulus	BP	0.0462783	94|650|659|1958|2022|2627|2662|2719|3491|4091|4093|7044|7049|23090|25928|55273|91851|140628|168667	ACVRL1|BMP2|BMPR2|EGR1|ENG|GATA6|GDF10|GPC3|CYR61|SMAD6|SMAD9|LEFTY2|TGFBR3|ZNF423|SOSTDC1|TMEM100|CHRDL1|GATA5|BMPER
GO:0070663	0.00233048	0.998982	21	202	regulation of leukocyte proliferation	BP	0.0464686	177|695|1178|2615|3071|3133|3553|3569|4332|5588|6441|6693|7048|7099|7128|7356|7940|8654|11326|51744|89780	AGER|BTK|CLC|LRRC32|NCKAP1L|HLA-E|IL1B|IL6|MNDA|PRKCQ|SFTPD|SPN|TGFBR2|TLR4|TNFAIP3|SCGB1A1|LST1|PDE5A|VSIG4|CD244|WNT3A
GO:0061298	0.0023357	0.999723	5	16	retina vasculature development in camera-type eye	BP	0.0465128	94|659|8322|22899|57381	ACVRL1|BMPR2|FZD4|ARHGEF15|RHOJ
GO:0071219	0.00235285	0.99905	18	157	cellular response to molecule of bacterial origin	BP	0.0467433	948|1440|1511|1524|1910|3055|3553|3569|4360|5581|6347|7099|7128|7538|9450|23328|27063|57088	CD36|CSF3|CTSG|CX3CR1|EDNRB|HCK|IL1B|IL6|MRC1|PRKCE|CCL2|TLR4|TNFAIP3|ZFP36|LY86|SASH1|ANKRD1|PLSCR4
GO:0009891	0.00235576	0.99829	128	1779	positive regulation of biosynthetic process	BP	0.0467433	94|153|154|186|322|408|467|554|650|659|745|1012|1030|1316|1440|1490|1536|1601|1634|1901|1906|1958|1959|2022|2034|2078|2115|2247|2263|2264|2294|2313|2353|2354|2624|2627|2852|2977|3043|3084|3164|3202|3400|3491|3553|3569|3727|3949|4005|4091|4093|4211|4222|4223|4784|4855|4881|5028|5155|5196|5295|5319|5325|5468|5588|5739|5745|5806|5990|6258|6347|6556|6622|6688|6693|6886|6910|6925|6926|6935|6943|7099|7…	ACVRL1|ADRB1|ADRB2|AGTR2|APBB1|ARRB1|ATF3|AVPR2|BMP2|BMPR2|MYRF|CDH13|CDKN2B|KLF6|CSF3|CTGF|CYBB|DAB2|DCN|S1PR1|EDN1|EGR1|EGR2|ENG|EPAS1|ERG|ETV1|FGF2|FGFR2|FGFR4|FOXF1|FLI1|FOS|FOSB|GATA2|GATA6|GPER1|GUCY1A2|HBB|NRG1|NR4A1|HOXA5|ID4|CYR61|IL1B|IL6|JUND|LDLR|LMO2|SMAD6|SMAD9|MEIS1|MEOX1|MEOX2|NFIX|NOTCH4|NPR1|P2RY1|PDGFB|PF4|PIK3R1|PLA2G1B|PLAGL1|PPARG|PRKCQ|PTGIR|PTH1R|PTX3|RFX2|RXRG|CCL2|SLC11A…
GO:0044255	0.00235632	0.99842	81	1060	cellular lipid metabolic process	BP	0.0467433	32|33|154|185|216|240|241|246|341|660|847|857|1268|1572|1839|1906|2167|2171|2247|2262|2263|2264|2268|2549|2627|2690|2719|2819|3084|3491|3949|4023|5023|5155|5166|5168|5295|5319|5320|5322|5468|5730|5740|5948|5950|6383|6622|7010|8013|8395|8613|8706|9314|9365|9444|9619|10630|10908|11000|22979|23533|27306|30815|50487|51196|55289|55911|57515|79948|79966|81849|84879|114898|152831|255189|255738|256435|33…	ACACB|ACADL|ADRB2|AGTR1|ALDH1A1|ALOX5|ALOX5AP|ALOX15|APOC1|BMX|CAT|CAV1|CNR1|CYP2F1|HBEGF|EDN1|FABP4|FABP5|FGF2|GPC5|FGFR2|FGFR4|FGR|GAB1|GATA6|GHR|GPC3|GPD1|NRG1|CYR61|LDLR|LPL|P2RX1|PDGFB|PDK4|ENPP2|PIK3R1|PLA2G1B|PLA2G2A|PLA2G5|PPARG|PTGDS|PTGIS|RBP2|RBP4|SDC2|SNCA|TEK|NR4A3|PIP5K1B|PLPP3|B3GALNT1|KLF4|KL|QKI|ABCG1|PDPN|PNPLA6|SLC27A3|EFR3B|PIK3R5|HPGDS|ST6GALNAC6|PLA2G3|PLCE1|ACOXL|APOBR|SERI…
GO:0003186	0.00236739	0.999921	3	5	tricuspid valve morphogenesis	BP	0.0469027	659|7048|23493	BMPR2|TGFBR2|HEY2
GO:0035904	0.00239168	0.999411	9	48	aorta development	BP	0.0473235	94|2022|3340|4091|4628|4638|6909|23493|144165	ACVRL1|ENG|NDST1|SMAD6|MYH10|MYLK|TBX2|HEY2|PRICKLE1
GO:0002003	0.00240099	0.999799	4	12	angiotensin maturation	BP	0.0474471	1359|1511|1636|4311	CPA3|CTSG|ACE|MME
GO:0003208	0.00240418	0.999294	11	71	cardiac ventricle morphogenesis	BP	0.0474496	2022|2263|2294|3084|6910|7048|7049|7134|23493|57493|140706	ENG|FGFR2|FOXF1|NRG1|TBX5|TGFBR2|TGFBR3|TNNC1|HEY2|HEG1|CCM2L
GO:0045778	0.00241532	0.999242	12	82	positive regulation of ossification	BP	0.0476089	154|650|659|2824|3400|3491|3569|3727|4921|7704|9365|255743	ADRB2|BMP2|BMPR2|GPM6B|ID4|CYR61|IL6|JUND|DDR2|ZBTB16|KL|NPNT
GO:0051341	0.00243124	0.999233	12	88	regulation of oxidoreductase activity	BP	0.0478618	185|186|857|1268|1906|3553|4883|5593|6622|8639|115677|120892	AGTR1|AGTR2|CAV1|CNR1|EDN1|IL1B|NPR3|PRKG2|SNCA|AOC3|NOSTRIN|LRRK2
GO:0051346	0.00244048	0.998684	35	398	negative regulation of hydrolase activity	BP	0.0479828	2|341|358|408|710|1285|1473|2621|2719|3071|3569|3730|3953|5627|5806|6590|6622|7078|8434|9314|9353|9806|23645|27074|27151|51232|57718|58189|58484|80760|114769|120892|128488|221476|653145	A2M|APOC1|AQP1|ARRB1|SERPING1|COL4A3|CST5|GAS6|GPC3|NCKAP1L|IL6|ANOS1|LEPR|PROS1|PTX3|SLPI|SNCA|TIMP3|RECK|KLF4|SLIT2|SPOCK2|PPP1R15A|LAMP3|CPAMD8|CRIM1|PPP4R4|WFDC1|NLRC4|ITIH5|CARD16|LRRK2|WFDC12|PI16|ANXA8
GO:0061564	0.00244946	0.998594	43	458	axon development	BP	0.0480863	104|322|627|659|1268|1808|1959|2115|2263|2549|2674|3084|3730|4628|4915|4969|4974|5295|5588|5800|6092|6387|6586|6711|8013|9037|9046|9314|9353|9638|9839|22854|23767|51393|53358|55118|56920|57556|59277|83700|85358|89780|220164	ADARB1|APBB1|BDNF|BMPR2|CNR1|DPYSL2|EGR2|ETV1|FGFR2|GAB1|GFRA1|NRG1|ANOS1|MYH10|NTRK2|OGN|OMG|PIK3R1|PRKCQ|PTPRO|ROBO2|CXCL12|SLIT3|SPTBN1|NR4A3|SEMA5A|DOK2|KLF4|SLIT2|FEZ1|ZEB2|NTNG1|FLRT3|TRPV2|SHC3|CRTAC1|SEMA3G|SEMA6A|NTN4|JAM3|SHANK3|WNT3A|DOK6
GO:0032703	0.00245196	0.999697	5	18	negative regulation of interleukin-2 production	BP	0.0480863	947|6441|7128|7538|11326	CD34|SFTPD|TNFAIP3|ZFP36|VSIG4
GO:0001945	0.0024667	0.999608	6	24	lymph vessel development	BP	0.0483143	94|659|10630|54345|57493|79652	ACVRL1|BMPR2|PDPN|SOX18|HEG1|TMEM204
GO:0060840	0.00250097	0.999214	12	78	artery development	BP	0.0488223	94|659|2022|2294|2702|3340|4091|4628|4638|6909|23493|144165	ACVRL1|BMPR2|ENG|FOXF1|GJA5|NDST1|SMAD6|MYH10|MYLK|TBX2|HEY2|PRICKLE1
GO:1902668	0.00250155	0.999802	4	10	negative regulation of axon guidance	BP	0.0488223	5800|9037|9353|89780	PTPRO|SEMA5A|SLIT2|WNT3A
GO:0045670	0.00250209	0.999313	10	63	regulation of osteoclast differentiation	BP	0.0488223	2353|5295|7099|7305|9770|11025|51208|84959|130733|133522	FOS|PIK3R1|TLR4|TYROBP|RASSF2|LILRB3|CLDN18|UBASH3B|TMEM178A|PPARGC1B
GO:0016051	0.0025221	0.998892	21	192	carbohydrate biosynthetic process	BP	0.0491509	467|2203|2819|2852|3036|3340|3569|3953|5028|5155|5745|5950|6622|8706|8850|10580|30815|51744|81849|114898|338596	ATF3|FBP1|GPD1|GPER1|HAS1|NDST1|IL6|LEPR|P2RY1|PDGFB|PTH1R|RBP4|SNCA|B3GALNT1|KAT2B|SORBS1|ST6GALNAC6|CD244|ST6GALNAC5|C1QTNF2|ST8SIA6
GO:0007202	0.0025966	0.999578	6	26	activation of phospholipase C activity	BP	0.0505391	728|5581|6401|8698|10316|115727	C5AR1|PRKCE|SELE|S1PR4|NMUR1|RASGRP4
GO:0030162	0.00260134	0.998386	56	715	regulation of proteolysis	BP	0.0505678	2|358|408|710|728|729|730|732|857|1285|1361|1473|1490|1601|2192|2264|2621|2719|2852|3491|3553|3569|3730|5023|5199|5468|5627|6590|6622|7078|7123|8425|8434|9314|9647|9806|10395|26577|27074|27151|51232|58189|58484|80760|83595|89780|90865|114769|120892|128488|144165|221476|255488|341676|641700|653145	A2M|AQP1|ARRB1|SERPING1|C5AR1|C6|C7|C8B|CAV1|COL4A3|CPB2|CST5|CTGF|DAB2|FBLN1|FGFR4|GAS6|GPC3|GPER1|CYR61|IL1B|IL6|ANOS1|P2RX1|CFP|PPARG|PROS1|SLPI|SNCA|TIMP3|CLEC3B|LTBP4|RECK|KLF4|PPM1F|SPOCK2|DLC1|PCOLCE2|LAMP3|CPAMD8|CRIM1|WFDC1|NLRC4|ITIH5|SOX7|WNT3A|IL33|CARD16|LRRK2|WFDC12|PRICKLE1|PI16|RNF144B|NEK5|ECSCR|ANXA8
GO:0030509	0.00260614	0.99894	18	148	BMP signaling pathway	BP	0.0505976	94|650|659|1958|2022|2627|2662|2719|3491|4091|4093|7044|7049|23090|25928|55273|91851|168667	ACVRL1|BMP2|BMPR2|EGR1|ENG|GATA6|GDF10|GPC3|CYR61|SMAD6|SMAD9|LEFTY2|TGFBR3|ZNF423|SOSTDC1|TMEM100|CHRDL1|BMPER
GO:0042044	0.00261569	0.999574	6	26	fluid transport	BP	0.0507195	358|361|366|1906|1910|6563	AQP1|AQP4|AQP9|EDN1|EDNRB|SLC14A1
GO:0060343	0.00264055	0.999569	6	26	trabecula formation	BP	0.0511375	5950|7010|7049|9510|23493|133522	RBP4|TEK|TGFBR3|ADAMTS1|HEY2|PPARGC1B
GO:0090051	0.00265363	0.999778	4	11	negative regulation of cell migration involved in sprouting angiogenesis	BP	0.0513266	4223|9314|79812|90627	MEOX2|KLF4|MMRN2|STARD13
GO:0050680	0.00266722	0.999018	15	116	negative regulation of epithelial cell proliferation	BP	0.0515252	94|687|857|858|1030|1361|2263|2697|2719|3851|7049|28984|55679|58189|84913	ACVRL1|KLF9|CAV1|CAV2|CDKN2B|CPB2|FGFR2|GJA1|GPC3|KRT4|TGFBR3|RGCC|LIMS2|WFDC1|ATOH8
GO:0032846	0.00270273	0.998779	22	207	positive regulation of homeostatic process	BP	0.0521028	186|408|845|857|1268|1906|1910|2624|2852|3071|3553|4881|5319|5588|6622|6886|8862|9002|57158|81501|133522|338442	AGTR2|ARRB1|CASQ2|CAV1|CNR1|EDN1|EDNRB|GATA2|GPER1|NCKAP1L|IL1B|NPR1|PLA2G1B|PRKCQ|SNCA|TAL1|APLN|F2RL3|JPH2|DCSTAMP|PPARGC1B|HCAR2
GO:0006633	0.00270384	0.999	15	124	fatty acid biosynthetic process	BP	0.0521028	32|33|246|341|1906|4023|5166|5319|5730|5740|9444|27306|79966|255189|401494	ACACB|ACADL|ALOX15|APOC1|EDN1|LPL|PDK4|PLA2G1B|PTGDS|PTGIS|QKI|HPGDS|SCD5|PLA2G4F|HACD4
GO:0071398	0.00273526	0.999307	9	52	cellular response to fatty acid	BP	0.0526426	1906|3949|5166|5468|5581|5734|5737|6347|55022	EDN1|LDLR|PDK4|PPARG|PRKCE|PTGER4|PTGFR|CCL2|PID1
GO:0045671	0.00276155	0.999548	6	25	negative regulation of osteoclast differentiation	BP	0.0530774	5295|7099|11025|51208|84959|130733	PIK3R1|TLR4|LILRB3|CLDN18|UBASH3B|TMEM178A
GO:0072503	0.0027647	0.998471	37	416	cellular divalent inorganic cation homeostasis	BP	0.0530774	185|477|728|845|857|948|1043|1901|1906|1910|2247|2357|2358|2624|2697|2828|2852|2890|3777|5028|5319|5581|5745|6347|6358|6368|6387|6556|6622|7466|8698|9002|51196|57158|64116|84959|130733	AGTR1|ATP1A2|C5AR1|CASQ2|CAV1|CD36|CD52|S1PR1|EDN1|EDNRB|FGF2|FPR1|FPR2|GATA2|GJA1|GPR4|GPER1|GRIA1|KCNK3|P2RY1|PLA2G1B|PRKCE|PTH1R|CCL2|CCL14|CCL23|CXCL12|SLC11A1|SNCA|WFS1|S1PR4|F2RL3|PLCE1|JPH2|SLC39A8|UBASH3B|TMEM178A
GO:0006909	0.00277375	0.998592	29	298	phagocytosis	BP	0.0531853	246|306|948|2207|2214|2219|2268|2621|2624|3055|3071|3553|3953|5175|5295|5468|5581|5806|6347|6441|6556|8547|8685|9936|22918|81035|146722|375033|653509	ALOX15|ANXA3|CD36|FCER1G|FCGR3A|FCN1|FGR|GAS6|GATA2|HCK|NCKAP1L|IL1B|LEPR|PECAM1|PIK3R1|PPARG|PRKCE|PTX3|CCL2|SFTPD|SLC11A1|FCN3|MARCO|CD302|CD93|COLEC12|CD300LF|PEAR1|SFTPA1
GO:0050830	0.0028049	0.999273	9	66	defense response to Gram-positive bacterium	BP	0.0537162	728|820|948|1511|2268|3133|3569|5319|5320	C5AR1|CAMP|CD36|CTSG|FGR|HLA-E|IL6|PLA2G1B|PLA2G2A
GO:0044710	0.00286509	0.997722	271	4234	single-organism metabolic process	BP	0.0548011	32|33|54|94|125|153|154|177|185|203|216|240|241|246|284|341|358|408|467|477|554|650|659|660|683|728|761|762|847|857|858|948|1036|1043|1268|1285|1305|1326|1410|1490|1536|1572|1580|1593|1634|1636|1839|1843|1850|1906|1910|1958|2022|2157|2167|2171|2192|2203|2207|2247|2262|2263|2264|2268|2327|2328|2357|2549|2621|2627|2662|2674|2690|2719|2819|2852|2878|2890|2949|2977|3036|3055|3084|3101|3340|3373|3491|…	ACACB|ACADL|ACP5|ACVRL1|ADH1B|ADRB1|ADRB2|AGER|AGTR1|AK1|ALDH1A1|ALOX5|ALOX5AP|ALOX15|ANGPT1|APOC1|AQP1|ARRB1|ATF3|ATP1A2|AVPR2|BMP2|BMPR2|BMX|BST1|C5AR1|CA3|CA4|CAT|CAV1|CAV2|CD36|CDO1|CD52|CNR1|COL4A3|COL13A1|MAP3K8|CRYAB|CTGF|CYBB|CYP2F1|CYP4B1|CYP27A1|DCN|ACE|HBEGF|DUSP1|DUSP8|EDN1|EDNRB|EGR1|ENG|F8|FABP4|FABP5|FBLN1|FBP1|FCER1G|FGF2|GPC5|FGFR2|FGFR4|FGR|FMO2|FMO3|FPR1|GAB1|GAS6|GATA6|GDF10|G…
GO:0009187	0.00288431	0.998717	21	197	cyclic nucleotide metabolic process	BP	0.0550281	153|154|358|554|1906|1910|2852|2977|4881|4883|5138|5153|5196|5739|7466|8622|8654|10203|10266|196883|283383	ADRB1|ADRB2|AQP1|AVPR2|EDN1|EDNRB|GPER1|GUCY1A2|NPR1|NPR3|PDE2A|PDE1B|PF4|PTGIR|WFS1|PDE8B|PDE5A|CALCRL|RAMP2|ADCY4|ADGRD1
GO:0032760	0.00288612	0.999257	9	57	positive regulation of tumor necrosis factor production	BP	0.0550281	948|1536|2207|3133|5196|5295|6347|6693|7099	CD36|CYBB|FCER1G|HLA-E|PF4|PIK3R1|CCL2|SPN|TLR4
GO:0010645	0.00289117	1	2	2	regulation of cell communication by chemical coupling	BP	0.0550281	2697|2702	GJA1|GJA5
GO:0010652	0.00289117	1	2	2	positive regulation of cell communication by chemical coupling	BP	0.0550281	2697|2702	GJA1|GJA5
GO:0007159	0.00290942	0.998462	32	349	leukocyte cell-cell adhesion	BP	0.0553076	177|857|1178|1326|1960|2615|3071|3133|3142|3553|3569|3575|5295|5588|6347|6387|6401|6403|6404|6441|6693|6935|7048|7356|7704|8013|8654|9308|9314|11326|51744|57864	AGER|CAV1|CLC|MAP3K8|EGR3|LRRC32|NCKAP1L|HLA-E|HLX|IL1B|IL6|IL7R|PIK3R1|PRKCQ|CCL2|CXCL12|SELE|SELP|SELPLG|SFTPD|SPN|ZEB1|TGFBR2|SCGB1A1|ZBTB16|NR4A3|PDE5A|CD83|KLF4|VSIG4|CD244|SLC46A2
GO:0046470	0.00292356	0.999112	11	79	phosphatidylcholine metabolic process	BP	0.0555083	341|2171|3949|5168|5319|5320|5322|10908|50487|84879|255189	APOC1|FABP5|LDLR|ENPP2|PLA2G1B|PLA2G2A|PLA2G5|PNPLA6|PLA2G3|MFSD2A|PLA2G4F
GO:0055001	0.00293862	0.99879	18	151	muscle cell development	BP	0.0556195	186|845|858|1073|1906|2022|4628|4629|6445|6926|7111|9254|10266|10529|23493|27063|58529|91624	AGTR2|CASQ2|CAV2|CFL2|EDN1|ENG|MYH10|MYH11|SGCG|TBX3|TMOD1|CACNA2D2|RAMP2|NEBL|HEY2|ANKRD1|MYOZ1|NEXN
GO:0090269	0.00294019	0.999874	3	6	fibroblast growth factor production	BP	0.0556195	28984|57493|140706	RGCC|HEG1|CCM2L
GO:0090270	0.00294019	0.999874	3	6	regulation of fibroblast growth factor production	BP	0.0556195	28984|57493|140706	RGCC|HEG1|CCM2L
GO:0045730	0.00295067	0.999502	6	28	respiratory burst	BP	0.0557497	1043|1536|3055|4688|6556|653361	CD52|CYBB|HCK|NCF2|SLC11A1|NCF1
GO:0006801	0.00296538	0.999232	9	58	superoxide metabolic process	BP	0.0558525	683|948|1536|1906|4688|10516|53905|57580|653361	BST1|CD36|CYBB|EDN1|NCF2|FBLN5|DUOX1|PREX1|NCF1
GO:1902930	0.0029672	0.999404	7	35	regulation of alcohol biosynthetic process	BP	0.0558525	2852|3553|5028|5745|6622|9619|51744	GPER1|IL1B|P2RY1|PTH1R|SNCA|ABCG1|CD244
GO:0007267	0.00296796	0.99787	113	1549	cell-cell signaling	BP	0.0558525	104|153|154|185|186|408|477|590|627|650|695|712|845|857|945|946|947|976|1268|1524|1601|1906|1958|1959|1960|2263|2697|2701|2702|2719|2852|2869|2890|3202|3553|3569|3762|3777|4900|4915|4919|5023|5028|5098|5155|5251|5334|5376|5581|5739|5800|5923|5950|6330|6347|6368|6369|6425|6505|6532|6622|6751|6910|6926|7010|7433|8322|8425|8613|8622|8676|8825|8839|8862|8994|9037|9254|9314|9839|11069|11197|11346|2323…	ADARB1|ADRB1|ADRB2|AGTR1|AGTR2|ARRB1|ATP1A2|BCHE|BDNF|BMP2|BTK|C1QA|CASQ2|CAV1|CD33|SIGLEC6|CD34|ADGRE5|CNR1|CX3CR1|DAB2|EDN1|EGR1|EGR2|EGR3|FGFR2|GJA1|GJA4|GJA5|GPC3|GPER1|GRK5|GRIA1|HOXA5|IL1B|IL6|KCNJ5|KCNK3|NRGN|NTRK2|ROR1|P2RX1|P2RY1|PCDHGC3|PDGFB|PHEX|PLCL1|PMP22|PRKCE|PTGIR|PTPRO|RASGRF1|RBP4|SCN4B|CCL2|CCL23|CCL24|SFRP5|SLC1A1|SLC6A4|SNCA|SSTR1|TBX5|TBX3|TEK|VIPR1|FZD4|LTBP4|PLPP3|PDE8B|S…
GO:0032412	0.00297053	0.998677	21	191	regulation of ion transmembrane transporter activity	BP	0.0558525	477|482|845|857|2040|2273|5243|5348|5581|5923|6330|6769|7402|7881|23237|53826|57158|79026|85358|255738|283518	ATP1A2|ATP1B2|CASQ2|CAV1|STOM|FHL1|ABCB1|FXYD1|PRKCE|RASGRF1|SCN4B|STAC|UTRN|KCNAB1|ARC|FXYD6|JPH2|AHNAK|SHANK3|PCSK9|KCNRG
GO:0048878	0.00299887	0.997979	79	1034	chemical homeostasis	BP	0.0563169	177|185|186|358|361|366|408|477|482|554|728|730|845|857|948|1043|1268|1318|1361|1634|1901|1906|1910|2034|2167|2247|2264|2273|2357|2358|2621|2624|2697|2702|2828|2852|2890|3101|3569|3777|3949|3953|4023|4881|5028|5166|5295|5319|5468|5581|5745|5950|6332|6347|6358|6368|6387|6441|6556|6622|7466|8698|9002|9365|9429|9619|51092|51196|57158|64116|79901|84959|120892|130733|196883|245972|255738|286133|338328	AGER|AGTR1|AGTR2|AQP1|AQP4|AQP9|ARRB1|ATP1A2|ATP1B2|AVPR2|C5AR1|C7|CASQ2|CAV1|CD36|CD52|CNR1|SLC31A2|CPB2|DCN|S1PR1|EDN1|EDNRB|EPAS1|FABP4|FGF2|FGFR4|FHL1|FPR1|FPR2|GAS6|GATA2|GJA1|GJA5|GPR4|GPER1|GRIA1|HK3|IL6|KCNK3|LDLR|LEPR|LPL|NPR1|P2RY1|PDK4|PIK3R1|PLA2G1B|PPARG|PRKCE|PTH1R|RBP4|SCN7A|CCL2|CCL14|CCL23|CXCL12|SFTPD|SLC11A1|SNCA|WFS1|S1PR4|F2RL3|KL|ABCG2|ABCG1|SIDT2|PLCE1|JPH2|SLC39A8|CYBRD1|U…
GO:0045779	0.00302285	0.99973	4	12	negative regulation of bone resorption	BP	0.0566985	3569|7128|51208|84959	IL6|TNFAIP3|CLDN18|UBASH3B
GO:0030799	0.00302809	0.998745	18	163	regulation of cyclic nucleotide metabolic process	BP	0.0567282	153|154|554|1906|1910|2852|2977|4881|4883|5138|5196|5739|7466|8654|10203|10266|196883|283383	ADRB1|ADRB2|AVPR2|EDN1|EDNRB|GPER1|GUCY1A2|NPR1|NPR3|PDE2A|PF4|PTGIR|WFS1|PDE5A|CALCRL|RAMP2|ADCY4|ADGRD1
GO:0043255	0.00305104	0.999014	12	82	regulation of carbohydrate biosynthetic process	BP	0.057089	2203|2852|3569|3953|5028|5155|5745|6622|8850|10580|51744|114898	FBP1|GPER1|IL6|LEPR|P2RY1|PDGFB|PTH1R|SNCA|KAT2B|SORBS1|CD244|C1QTNF2
GO:0043551	0.00308623	0.999289	8	41	regulation of phosphatidylinositol 3-kinase activity	BP	0.0576778	2247|2268|5155|5295|7010|9314|23533|388121	FGF2|FGR|PDGFB|PIK3R1|TEK|KLF4|PIK3R5|TNFAIP8L3
GO:0070664	0.00309284	0.999122	10	67	negative regulation of leukocyte proliferation	BP	0.0577184	695|2615|4332|6441|6693|7128|7356|7940|8654|11326	BTK|LRRC32|MNDA|SFTPD|SPN|TNFAIP3|SCGB1A1|LST1|PDE5A|VSIG4
GO:0051492	0.00309585	0.99906	11	71	regulation of stress fiber assembly	BP	0.0577184	395|1490|1901|5295|5734|9647|10174|10395|22899|28984|90102	ARHGAP6|CTGF|S1PR1|PIK3R1|PTGER4|PPM1F|SORBS3|DLC1|ARHGEF15|RGCC|PHLDB2
GO:1900371	0.00312073	0.998741	17	151	regulation of purine nucleotide biosynthetic process	BP	0.0579665	153|154|554|1906|1910|2852|2977|4881|4883|5138|5739|7466|10203|10266|55022|196883|283383	ADRB1|ADRB2|AVPR2|EDN1|EDNRB|GPER1|GUCY1A2|NPR1|NPR3|PDE2A|PTGIR|WFS1|CALCRL|RAMP2|PID1|ADCY4|ADGRD1
GO:0071375	0.0031223	0.998401	29	298	cellular response to peptide hormone stimulus	BP	0.0579665	185|186|857|858|1906|2549|2690|2791|2852|3164|3553|3569|5166|5295|5319|5468|5588|6347|8013|8835|8850|9021|9365|10580|55022|64397|196883|245972|255738	AGTR1|AGTR2|CAV1|CAV2|EDN1|GAB1|GHR|GNG11|GPER1|NR4A1|IL1B|IL6|PDK4|PIK3R1|PLA2G1B|PPARG|PRKCQ|CCL2|NR4A3|SOCS2|KAT2B|SOCS3|KL|SORBS1|PID1|ZNF106|ADCY4|ATP6V0D2|PCSK9
GO:2000043	0.00312634	1	2	2	regulation of cardiac cell fate specification	BP	0.0579665	64321|89780	SOX17|WNT3A
GO:0050482	0.00312786	0.999463	6	29	arachidonic acid secretion	BP	0.0579665	1636|5319|5320|5322|50487|255189	ACE|PLA2G1B|PLA2G2A|PLA2G5|PLA2G3|PLA2G4F
GO:1903963	0.00312786	0.999463	6	29	arachidonate transport	BP	0.0579665	1636|5319|5320|5322|50487|255189	ACE|PLA2G1B|PLA2G2A|PLA2G5|PLA2G3|PLA2G4F
GO:0002699	0.00313985	0.998694	18	164	positive regulation of immune effector process	BP	0.0580742	695|729|948|2207|2268|2294|2624|3133|3142|3553|3569|5950|6347|7099|8013|23705|51744|90865	BTK|C6|CD36|FCER1G|FGR|FOXF1|GATA2|HLA-E|HLX|IL1B|IL6|RBP4|CCL2|TLR4|NR4A3|CADM1|CD244|IL33
GO:0002864	0.00314117	0.99971	4	13	regulation of acute inflammatory response to antigenic stimulus	BP	0.0580742	695|1268|2207|6693	BTK|CNR1|FCER1G|SPN
GO:0055074	0.00315581	0.998255	36	405	calcium ion homeostasis	BP	0.0582404	185|477|728|845|857|948|1043|1901|1906|1910|2247|2357|2358|2624|2697|2828|2852|2890|3777|5028|5319|5581|5745|6347|6358|6368|6387|6622|7466|8698|9002|9365|51196|57158|84959|130733	AGTR1|ATP1A2|C5AR1|CASQ2|CAV1|CD36|CD52|S1PR1|EDN1|EDNRB|FGF2|FPR1|FPR2|GATA2|GJA1|GPR4|GPER1|GRIA1|KCNK3|P2RY1|PLA2G1B|PRKCE|PTH1R|CCL2|CCL14|CCL23|CXCL12|SNCA|WFS1|S1PR4|F2RL3|KL|PLCE1|JPH2|UBASH3B|TMEM178A
GO:0007266	0.00315768	0.998622	20	169	Rho protein signal transduction	BP	0.0582404	185|395|408|1012|2828|5923|9002|9411|9459|10395|22899|26084|57381|57580|64411|80243|152273|286205|345930|389337	AGTR1|ARHGAP6|ARRB1|CDH13|GPR4|RASGRF1|F2RL3|ARHGAP29|ARHGEF6|DLC1|ARHGEF15|ARHGEF26|RHOJ|PREX1|ARAP3|PREX2|FGD5|SCAI|ECT2L|ARHGEF37
GO:0006874	0.00318661	0.998253	35	392	cellular calcium ion homeostasis	BP	0.0586195	185|477|728|845|857|948|1043|1901|1906|1910|2247|2357|2358|2624|2697|2828|2852|2890|3777|5028|5319|5581|5745|6347|6358|6368|6387|6622|7466|8698|9002|51196|57158|84959|130733	AGTR1|ATP1A2|C5AR1|CASQ2|CAV1|CD36|CD52|S1PR1|EDN1|EDNRB|FGF2|FPR1|FPR2|GATA2|GJA1|GPR4|GPER1|GRIA1|KCNK3|P2RY1|PLA2G1B|PRKCE|PTH1R|CCL2|CCL14|CCL23|CXCL12|SNCA|WFS1|S1PR4|F2RL3|PLCE1|JPH2|UBASH3B|TMEM178A
GO:0060259	0.00318795	0.999568	5	21	regulation of feeding behavior	BP	0.0586195	181|1268|3953|8013|56729	AGRP|CNR1|LEPR|NR4A3|RETN
GO:0007229	0.003193	0.998905	13	92	integrin-mediated signaling pathway	BP	0.0586195	667|683|1490|2013|2207|2268|3055|4739|7305|8516|9510|55679|84106	DST|BST1|CTGF|EMP2|FCER1G|FGR|HCK|NEDD9|TYROBP|ITGA8|ADAMTS1|LIMS2|PRAM1
GO:0010863	0.00319735	0.999348	7	35	positive regulation of phospholipase C activity	BP	0.0586195	728|2247|5581|6401|8698|10316|115727	C5AR1|FGF2|PRKCE|SELE|S1PR4|NMUR1|RASGRP4
GO:0060405	0.00319909	0.999859	3	6	regulation of penile erection	BP	0.0586195	1268|1910|5028	CNR1|EDNRB|P2RY1
GO:0043406	0.00320094	0.998505	23	217	positive regulation of MAP kinase activity	BP	0.0586195	177|408|650|728|1906|2247|2357|2549|2690|3084|3553|5155|5319|6283|7099|8322|8654|9839|23328|23533|51196|114898|120892	AGER|ARRB1|BMP2|C5AR1|EDN1|FGF2|FPR1|GAB1|GHR|NRG1|IL1B|PDGFB|PLA2G1B|S100A12|TLR4|FZD4|PDE5A|ZEB2|SASH1|PIK3R5|PLCE1|C1QTNF2|LRRK2
GO:0050670	0.00323581	0.998577	20	194	regulation of lymphocyte proliferation	BP	0.0591882	177|695|1178|2615|3071|3133|3553|3569|4332|5588|6441|6693|7048|7099|7356|7940|8654|11326|51744|89780	AGER|BTK|CLC|LRRC32|NCKAP1L|HLA-E|IL1B|IL6|MNDA|PRKCQ|SFTPD|SPN|TGFBR2|TLR4|SCGB1A1|LST1|PDE5A|VSIG4|CD244|WNT3A
GO:0034104	0.00325464	0.999566	5	19	negative regulation of tissue remodeling	BP	0.0594625	177|3569|7128|51208|84959	AGER|IL6|TNFAIP3|CLDN18|UBASH3B
GO:1903725	0.00326134	0.999072	10	62	regulation of phospholipid metabolic process	BP	0.0595147	341|2247|2268|3949|5155|5295|7010|9314|23533|388121	APOC1|FGF2|FGR|LDLR|PDGFB|PIK3R1|TEK|KLF4|PIK3R5|TNFAIP8L3
GO:0045342	0.00327241	0.999694	4	13	MHC class II biosynthetic process	BP	0.0596464	5196|6556|6688|7099	PF4|SLC11A1|SPI1|TLR4
GO:2000021	0.00328384	0.998524	21	195	regulation of ion homeostasis	BP	0.0597843	185|186|477|554|845|857|1634|1906|1910|2247|2273|2702|2852|4881|5319|5581|6622|9002|57158|84959|120892	AGTR1|AGTR2|ATP1A2|AVPR2|CASQ2|CAV1|DCN|EDN1|EDNRB|FGF2|FHL1|GJA5|GPER1|NPR1|PLA2G1B|PRKCE|SNCA|F2RL3|JPH2|UBASH3B|LRRK2
GO:0030808	0.00329037	0.998666	17	152	regulation of nucleotide biosynthetic process	BP	0.0597843	153|154|554|1906|1910|2852|2977|4881|4883|5138|5739|7466|10203|10266|55022|196883|283383	ADRB1|ADRB2|AVPR2|EDN1|EDNRB|GPER1|GUCY1A2|NPR1|NPR3|PDE2A|PTGIR|WFS1|CALCRL|RAMP2|PID1|ADCY4|ADGRD1
GO:0002762	0.00329155	0.999228	8	44	negative regulation of myeloid leukocyte differentiation	BP	0.0597843	714|2624|5295|7099|11025|51208|84959|130733	C1QC|GATA2|PIK3R1|TLR4|LILRB3|CLDN18|UBASH3B|TMEM178A
GO:0002090	0.00330441	0.999325	7	34	regulation of receptor internalization	BP	0.0599475	284|408|6401|6456|89780|255738|284654	ANGPT1|ARRB1|SELE|SH3GL2|WNT3A|PCSK9|RSPO1
GO:0072008	0.00333138	0.999851	3	6	glomerular mesangial cell differentiation	BP	0.0603132	947|2828|5155	CD34|GPR4|PDGFB
GO:1904951	0.00333917	0.998032	44	515	positive regulation of establishment of protein localization	BP	0.0603132	186|322|408|947|1440|1601|2040|2219|2268|2621|2697|2852|3084|3133|3553|3569|4023|5295|5319|5581|5734|5950|6347|6711|7099|8809|9037|9173|10268|10316|10580|22885|23705|25924|26253|27063|28984|51311|51744|89780|90506|90865|123264|338442	AGTR2|APBB1|ARRB1|CD34|CSF3|DAB2|STOM|FCN1|FGR|GAS6|GJA1|GPER1|NRG1|HLA-E|IL1B|IL6|LPL|PIK3R1|PLA2G1B|PRKCE|PTGER4|RBP4|CCL2|SPTBN1|TLR4|IL18R1|SEMA5A|IL1RL1|RAMP3|NMUR1|SORBS1|ABLIM3|CADM1|MYRIP|CLEC4E|ANKRD1|RGCC|TLR8|CD244|WNT3A|LRRC46|IL33|SLC51B|HCAR2
GO:0071505	0.00334013	1	2	2	response to mycophenolic acid	BP	0.0603132	1958|5155	EGR1|PDGFB
GO:0071506	0.00334013	1	2	2	cellular response to mycophenolic acid	BP	0.0603132	1958|5155	EGR1|PDGFB
GO:0015718	0.00338561	0.998625	17	148	monocarboxylic acid transport	BP	0.0610631	32|186|366|948|1636|1906|3553|5319|5320|5322|5468|6578|9120|50487|84879|123264|255189	ACACB|AGTR2|AQP9|CD36|ACE|EDN1|IL1B|PLA2G1B|PLA2G2A|PLA2G5|PPARG|SLCO2A1|SLC16A6|PLA2G3|MFSD2A|SLC51B|PLA2G4F
GO:0030316	0.00342409	0.998874	12	86	osteoclast differentiation	BP	0.0615373	2353|2719|5295|7099|7305|9770|11025|51208|81501|84959|130733|133522	FOS|GPC3|PIK3R1|TLR4|TYROBP|RASSF2|LILRB3|CLDN18|DCSTAMP|UBASH3B|TMEM178A|PPARGC1B
GO:1903707	0.00343412	0.998693	15	131	negative regulation of hemopoiesis	BP	0.0615373	714|2624|3142|3202|4211|5196|5295|7099|7538|7704|11025|51208|51621|84959|130733	C1QC|GATA2|HLX|HOXA5|MEIS1|PF4|PIK3R1|TLR4|ZFP36|ZBTB16|LILRB3|CLDN18|KLF13|UBASH3B|TMEM178A
GO:0001868	0.00343507	1	2	2	regulation of complement activation, lectin pathway	BP	0.0615373	2|710	A2M|SERPING1
GO:0001869	0.00343507	1	2	2	negative regulation of complement activation, lectin pathway	BP	0.0615373	2|710	A2M|SERPING1
GO:0071354	0.00343529	0.999405	6	27	cellular response to interleukin-6	BP	0.0615373	2549|3569|5740|6347|6404|55022	GAB1|IL6|PTGIS|CCL2|SELPLG|PID1
GO:0035809	0.00343573	0.999531	5	20	regulation of urine volume	BP	0.0615373	554|1906|1910|4881|4883	AVPR2|EDN1|EDNRB|NPR1|NPR3
GO:0032944	0.00345264	0.998472	20	195	regulation of mononuclear cell proliferation	BP	0.0617139	177|695|1178|2615|3071|3133|3553|3569|4332|5588|6441|6693|7048|7099|7356|7940|8654|11326|51744|89780	AGER|BTK|CLC|LRRC32|NCKAP1L|HLA-E|IL1B|IL6|MNDA|PRKCQ|SFTPD|SPN|TGFBR2|TLR4|SCGB1A1|LST1|PDE5A|VSIG4|CD244|WNT3A
GO:0071396	0.00345356	0.997936	46	533	cellular response to lipid	BP	0.0617139	186|358|477|687|948|1440|1511|1524|1601|1906|1910|2852|3055|3164|3553|3569|3949|4360|5166|5251|5468|5581|5734|5737|6258|6347|6532|6751|6943|7099|7128|7538|8013|8322|9314|9450|10268|23328|25959|27063|55022|57088|57658|89780|133522|167465	AGTR2|AQP1|ATP1A2|KLF9|CD36|CSF3|CTSG|CX3CR1|DAB2|EDN1|EDNRB|GPER1|HCK|NR4A1|IL1B|IL6|LDLR|MRC1|PDK4|PHEX|PPARG|PRKCE|PTGER4|PTGFR|RXRG|CCL2|SLC6A4|SSTR1|TCF21|TLR4|TNFAIP3|ZFP36|NR4A3|FZD4|KLF4|LY86|RAMP3|SASH1|KANK2|ANKRD1|PID1|PLSCR4|CALCOCO1|WNT3A|PPARGC1B|ZNF366
GO:0032642	0.00346215	0.999	10	68	regulation of chemokine production	BP	0.0617962	177|1958|2532|3553|3569|4023|7099|9173|9314|90865	AGER|EGR1|ACKR1|IL1B|IL6|LPL|TLR4|IL1RL1|KLF4|IL33
GO:0042742	0.00349138	0.998348	23	264	defense response to bacterium	BP	0.0622462	306|728|820|948|1511|2207|2268|3133|3569|5199|5319|5320|5473|6283|6403|6441|6556|6590|6693|7099|26253|58484|128488	ANXA3|C5AR1|CAMP|CD36|CTSG|FCER1G|FGR|HLA-E|IL6|CFP|PLA2G1B|PLA2G2A|PPBP|S100A12|SELP|SFTPD|SLC11A1|SLPI|SPN|TLR4|CLEC4E|NLRC4|WFDC12
GO:0038112	0.00356767	1	2	2	interleukin-8-mediated signaling pathway	BP	0.0635333	3577|3579	CXCR1|CXCR2
GO:0019800	0.0035878	0.999835	3	6	peptide cross-linking via chondroitin 4-sulfate glycosaminoglycan	BP	0.0638184	1634|9806|79625	DCN|SPOCK2|NDNF
GO:0002002	0.00363694	0.999649	4	13	regulation of angiotensin levels in blood	BP	0.0645443	1359|1511|1636|4311	CPA3|CTSG|ACE|MME
GO:0060177	0.00363694	0.999649	4	13	regulation of angiotensin metabolic process	BP	0.0645443	1359|1511|1636|4311	CPA3|CTSG|ACE|MME
[truncated: 1,083 more rows]

## Sheet: Molecular Function
category	over_represented_pvalue	under_represented_pvalue	numDEInCat	numInCat	term	ontology	over_represented_FDR	gene_id	gene_name
[truncated: 218 more rows]

## Sheet: Cellular Component
category	over_represented_pvalue	under_represented_pvalue	numDEInCat	numInCat	term	ontology	over_represented_FDR	gene_id	gene_name
[truncated: 168 more rows]

## Sheet: KEGG Pathway
Term	Database	ID	Input number	Background number	P-Value	Corrected P-Value	Input_id	Input_name	Hyperlink
[truncated: 29 more rows]
